# Supplementary material for: Comparative Phenotypical and Molecular Analyses of Arabidopsis Grown under Fluorescent and LED Light
Source: Plants (Basel). 2017 Jun 13;6(2):24. doi: 10.3390/plants6020024 (PMC5489796; doi:10.3390/plants6020024)
Supplement: Supplementary File 2 [file plants-06-00024-s002.xlsx]

## Sheet: LED100- KK FC≥1
Up regulated genes in CC
Identifier	FC CC	log FC CC	BIN	Gene ID	annotation
249645_at	9.82059	-3.29581	20.1.2 stress.biotic.receptors	at5g36910	THI2.2 THI2.2 (THIONIN 2.2) toxin receptor binding
264147_at	5.16071	-2.36757	16.7 secondary metabolism.wax	at1g02205	CER1 CER1 (ECERIFERUM 1) octadecanal decarbonylase
265111_at	4.84557	-2.27667	26.21 misc.protease inhibitor/seed storage/lipid transfer protein (LTP) family protein	at1g62510	protease inhibitor/seed storage/lipid transfer protein (LTP) family protein
264146_at	4.32614	-2.11308	16.7 secondary metabolism.wax	at1g02205	CER1 CER1 (ECERIFERUM 1) octadecanal decarbonylase
261834_at	3.80264	-1.927	10.6.3 cell wall.degradation.pectate lyases and polygalacturonases	at1g10640	polygalacturonase
249383_at	3.75065	-1.90714	27.3.6 RNA.regulation of transcription.bHLH,Basic Helix-Loop-Helix family	at5g39860	PRE1 PRE1 (PACLOBUTRAZOL RESISTANCE1) DNA binding / transcription factor
253874_at	3.69043	-1.88379	17.2.3 hormone metabolism.auxin.induced-regulated-responsive-activated	at5g18060	auxin-responsive protein putative
255822_at	3.54397	-1.82537	10.7 cell wall.modification	at2g40610	ATHEXP ALPHA 1.11 ATEXPA8 (ARABIDOPSIS THALIANA EXPANSIN A8)
248912_at	3.49862	-1.80679	26.28 misc.GDSL-motif lipase	at5g45670	GDSL-motif lipase/hydrolase family protein
249923_at	3.40274	-1.7667	33.1 development.storage proteins	at5g19120	aspartic-type endopeptidase
259783_at	3.37262	-1.75387	17.2.3 hormone metabolism.auxin.induced-regulated-responsive-activated	at1g29510	SAUR68 SAUR68 (SMALL AUXIN UPREGULATED 68) 10322574-10323189 FORWARD
246114_at	3.26798	-1.7084	3.1.2.2 minor CHO metabolism.raffinose family.raffinose synthases.putative	at5g20250	DIN10 DIN10 (DARK INDUCIBLE 10) hydrolase
253309_at	3.064	-1.61542	11.9.4.13 lipid metabolism.lipid degradation.beta-oxidation.acyl CoA reductase	at4g33790	CER4 G7 FAR3 CER4 (ECERIFERUM 4) fatty acyl-CoA reductase (alcohol-forming)/ oxidoreductase
256245_at	3.05898	-1.61305	20.2.1 stress.abiotic.heat	at3g12580	HSP70 HSP70 (heat shock protein 70) ATP binding
247074_at	2.98541	-1.57793	20.2.99 stress.abiotic.unspecified	at5g66590	allergen V5/Tpx-1-related family protein
259751_at	2.85945	-1.51574	27.3.26 RNA.regulation of transcription.MYB-related transcription factor family	at1g71030	ATMYBL2 MYBL2 MYBL2 (ARABIDOPSIS MYB-LIKE 2) DNA binding / transcription factor
252983_at	2.73477	-1.45142	16.2.1.10 secondary metabolism.phenylpropanoids.lignin biosynthesis.CAD	at4g37980	ELI3-1 ELI3 ATCAD7 CAD7 ELI3-1 (ELICITOR-ACTIVATED GENE 3-1)
253061_at	2.66408	-1.41364	29.5.11.4.5.2 protein.degradation.ubiquitin.E3.BTB/POZ Cullin3.BTB/POZ	at4g37610	BT5 BT5 (BTB AND TAZ DOMAIN PROTEIN 5) protein binding / transcription regulator
260221_at	2.63944	-1.40023	17.6.3 hormone metabolism.gibberelin.induced-regulated-responsive-activated	at1g74670	gibberellin-responsive protein
254609_at	2.63798	-1.39943	26.28 misc.GDSL-motif lipase	at4g18970	GDSL-motif lipase/hydrolase family protein
267614_at	2.62836	-1.39416	17.3.1.1.5 hormone metabolism.brassinosteroid.synthesis-degradation.BRs.metabolic regulation	at2g26710	BAS1 CYP734A1 CYP72B1 BAS1 (PHYB ACTIVATION TAGGED SUPPRESSOR 1)
246195_at	2.62178	-1.39055	29.5.11.3 protein.degradation.ubiquitin.E2	at4g36410	UBC17 UBC17 (UBIQUITIN-CONJUGATING ENZYME 17) small conjugating protein ligase/ ubiquitin-protein ligase
258402_at	2.6076	-1.38272	17.2.3 hormone metabolism.auxin.induced-regulated-responsive-activated	at1g29440	molecular_function unknown INVOLVED IN response to auxin stimulus
245362_at	2.45056	-1.29311	27.3.22 RNA.regulation of transcription.HB,Homeobox transcription factor family	at4g17460	HAT1 HAT1 DNA binding / transcription factor
267238_at	2.44742	-1.29126	29.5.11.4.3.2 protein.degradation.ubiquitin.E3.SCF.FBOX	at2g44130	kelch repeat-containing F-box family protein
244965_at	2.42441	-1.27763	1.1.3 PS.lightreaction.cytochrome b6/f	atcg00590	ORF31 hypothetical protein chrC
259331_at	2.39647	-1.26091	17.2.3 hormone metabolism.auxin.induced-regulated-responsive-activated	at3g03840	auxin-responsive protein putative
259784_at	2.36633	-1.24265	17.2.3 hormone metabolism.auxin.induced-regulated-responsive-activated	at1g29450	auxin-responsive protein putative
259773_at	2.33996	-1.22648	17.2.3 hormone metabolism.auxin.induced-regulated-responsive-activated	at1g29500	auxin-responsive protein putative
258764_at	2.33409	-1.22286	10.8.1 cell wall.pectin*esterases.PME	at3g10720	pectinesterase
263595_at	2.29472	-1.19832	26.13 misc.acid and other phosphatases	at2g01890	PAP8 ATPAP8 PAP8 (PURPLE ACID PHOSPHATASE 8) acid phosphatase/ protein serine/threonine phosphatase
266168_at	2.28193	-1.19026	20.1 stress.biotic	at2g38870	protease inhibitor
264529_at	2.22844	-1.15603	23.1.1.10 nucleotide metabolism.synthesis.pyrimidine.CTP synthetase	at1g30820	CTP synthase putative / UTP--ammonia ligase putative
244969_at	2.15852	-1.11004	29.2.1.1.1.1.18 protein.synthesis.ribosomal protein.prokaryotic.chloroplast.30S subunit.S18	atcg00650	RPS18 chloroplast-encoded ribosomal protein S18 chrC
253423_at	2.1494	-1.10393	27.3.40 RNA.regulation of transcription.Aux/IAA family	at4g32280	IAA29 IAA29 (INDOLE-3-ACETIC ACID INDUCIBLE 29) transcription factor
246932_at	2.13914	-1.09703	17.5.2 hormone metabolism.ethylene.signal transduction	at5g25190	ethylene-responsive element-binding protein
251870_at	2.12747	-1.08914	20.2.3 stress.abiotic.drought/salt	at3g54510	early-responsive to dehydration protein-related / ERD protein-related
260152_at	2.11241	-1.07889	27.3.40 RNA.regulation of transcription.Aux/IAA family	at1g52830	IAA6 SHY1 IAA6 (INDOLE-3-ACETIC ACID 6) transcription factor
245264_at	2.0918	-1.06474	29.5.11.4.2 protein.degradation.ubiquitin.E3.RING	at4g17245	zinc finger (C3HC4-type RING finger) family protein
267101_at	2.08966	-1.06327	26.12 misc.peroxidases	at2g41480	electron carrier/ heme binding / peroxidase
262986_at	2.06517	-1.04626	29.5.11.4.3.2 protein.degradation.ubiquitin.E3.SCF.FBOX	at1g23390	kelch repeat-containing F-box family protein
264157_at	2.05274	-1.03755	10.7 cell wall.modification	at1g65310	XTH17 XTH17 (XYLOGLUCAN ENDOTRANSGLUCOSYLASE/HYDROLASE 17)
253207_at	2.04122	-1.02943	17.2.3 hormone metabolism.auxin.induced-regulated-responsive-activated	at4g34770	auxin-responsive family protein
251017_at	2.03451	-1.02468	29.4 protein.postranslational modification	at5g02760	protein phosphatase 2C family protein / PP2C family protein
250304_at	2.02466	-1.01768	29.2.4 protein.synthesis.elongation	at5g12110	elongation factor 1B alpha-subunit 1 (eEF1Balpha1)
261016_at	2.02355	-1.01689	26.3 misc.gluco-, galacto- and mannosidases	at1g26560	BGLU40 BGLU40 (BETA GLUCOSIDASE 40) catalytic/ cation binding / hydrolase hydrolyzing O-glycosyl compounds
248684_at	2.02267	-1.01626	26.21 misc.protease inhibitor/seed storage/lipid transfer protein (LTP) family protein	at5g48485	DIR1 DIR1 (DEFECTIVE IN INDUCED RESISTANCE 1) lipid binding / lipid transporter
252970_at	2.02158	-1.01548	17.2.3 hormone metabolism.auxin.induced-regulated-responsive-activated	at4g38850	SAUR_AC1 ATSAUR15 SAUR15 SAUR-AC1 SAUR15 (SMALL AUXIN UPREGULATED 15)
250478_at	2.00817	-1.00588	30.11 signalling.light	at5g10250	DOT3 DOT3 (DEFECTIVELY ORGANIZED TRIBUTARIES 3) protein binding / signal transducer
Down regulated genes in CC
Identifier	FC CC	log FC CC	BIN	Gene ID	annotation
249867_at	6.85548	2.77726	16.5.1.1.1.2 secondary metabolism.sulfur-containing.glucosinolates.synthesis.aliphatic.methylthioalkylmalate synthase (MAM)	at5g23020	MAM-L MAM3 IMS2 IMS2 (2-ISOPROPYLMALATE SYNTHASE 2)
258791_at	6.4841	2.69691	20.1 stress.biotic	at3g04720	PR4 HEL PR-4 PR4 (PATHOGENESIS-RELATED 4)
250942_at	6.1768	2.62686	26.16 misc.myrosinases-lectin-jacalin	at5g03350	legume lectin family protein
254232_at	5.81137	2.53888	13.1.3.4.2 amino acid metabolism.synthesis.aspartate family.methionine.cystathionine beta-lyase	at4g23600	CORI3 JR2 CORI3 (CORONATINE INDUCED 1) cystathionine beta-lyase/ transaminase
251625_at	5.81077	2.53873	26.4.1 misc.beta 1,3 glucan hydrolases.glucan endo-1,3-beta-glucosidase	at3g57260	BGL2 PR2 BG2
247013_at	5.79005	2.53358	27.3.72 RNA.regulation of transcription.Transcriptional Adaptor Zinc Bundle (TAZ) domain family	at5g67480	BT4 BT4 (BTB AND TAZ DOMAIN PROTEIN 4) protein binding / transcription regulator 26930940-26932756 REVERSE
256766_at	5.63032	2.49322	20.1 stress.biotic	at3g22231	PCC1 PCC1 (PATHOGEN AND CIRCADIAN CONTROLLED 1)
263548_at	5.14786	2.36397	27.4 RNA.RNA binding	at2g21660	ATGRP7 CCR2 GR-RBP7
265414_at	5.01003	2.32482	33.99 development.unspecified	at2g16660	nodulin family protein
257206_at	4.95439	2.30871	26.16 misc.myrosinases-lectin-jacalin	at3g16530	legume lectin family protein
249052_at	4.95266	2.3082	20.1.7.12 stress.biotic.PR-proteins.plant defensins	at5g44420	PDF1.2 PDF1.2A LCR77 PDF1.2
262119_s_at	4.84261	2.27579	26.9 misc.glutathione S transferases	MULTIPLE HITS (at1g02930 at1g02920). at1g02930	ATGSTF6 GST1 ERD11
253215_at	4.76412	2.25221	33.99 development.unspecified	at4g34950	nodulin family protein
257365_x_at	4.58921	2.19824	20.1.7.12 stress.biotic.PR-proteins.plant defensins	at2g26020	PDF1.2b PDF1.2b (plant defensin 1.2b)
264638_at	4.47035	2.16039	33.99 development.unspecified	at1g65480	FT FT (FLOWERING LOCUS T) phosphatidylethanolamine binding / protein binding
253627_at	4.45889	2.15668	20.2.3 stress.abiotic.drought/salt	at4g30650	hydrophobic protein putative / low temperature and salt responsive protein putative
257382_at	4.18198	2.06419	27.3.32 RNA.regulation of transcription.WRKY domain transcription factor family	at2g40750	WRKY54 ATWRKY54 WRKY54 transcription factor
259561_at	4.09487	2.03382	30.2.25 signalling.receptor kinases.wall associated kinase	at1g21250	WAK1 PRO25 WAK1 (CELL WALL-ASSOCIATED KINASE) kinase
249719_at	3.9301	1.97457	17.2.3 hormone metabolism.auxin.induced-regulated-responsive-activated	at5g35735	auxin-responsive family protein
256676_at	3.8845	1.95773	2.2.2.10 major CHO metabolism.degradation.starch.laforin like phosphoglucan phosphatase (SEX4)	at3g52180	ATPTPKIS1 DSP4 SEX4 SEX4 (STARCH-EXCESS 4)
264071_at	3.78694	1.92103	29.5 protein.degradation	at2g27920	SCPL51 SCPL51 (SERINE CARBOXYPEPTIDASE-LIKE 51) serine-type carboxypeptidase 11885571-11889176 REVERSE
266229_at	3.77166	1.9152	31.1 cell.organisation	at2g28840	ankyrin repeat family protein
248335_at	3.70859	1.89087	34.99 transport.misc	at5g52450	MATE efflux protein-related
246603_at	3.70046	1.8877	26.7 misc.oxidases - copper, flavone etc	at1g31690	amine oxidase/ copper ion binding / quinone binding
263497_at	3.65268	1.86896	20.2.2 stress.abiotic.cold	at2g42540	COR15A COR15 COR15A (COLD-REGULATED 15A)
247717_at	3.65219	1.86876	11.6 lipid metabolism.lipid transfer proteins etc	at5g59320	LTP3 LTP3 (LIPID TRANSFER PROTEIN 3) lipid binding
253268_s_at	3.64604	1.86633	16.8.4.2 secondary metabolism.flavonoids.flavonols.flavonol 3-O-glycosyltransferase AND 26.2 misc.UDP glucosyl and glucoronyl transferases	MULTIPLE HITS (at4g34131 at4g34135). At4g34131	UGT73B3 UGT73B3 (UDP-glucosyl transferase 73B3) UDP-glycosyltransferase/ abscisic acid glucosyltransferase/ quercetin 3-O-glucosyltransferase/ transferase transferring hexosyl groups
246573_at	3.50826	1.81075	26.7 misc.oxidases - copper, flavone etc	at1g31690	amine oxidase/ copper ion binding / quinone binding
245465_at	3.46267	1.79189	10.2 cell wall.cellulose synthesis	at4g16590	ATCSLA01 CSLA01 ATCSLA1 ATCSLA01
248551_at	3.42607	1.77656	34.4 transport.nitrate	at5g50200	WR3 WR3 (WOUND-RESPONSIVE 3) nitrate transmembrane transporter
245052_at	3.34734	1.74302	10.8.1 cell wall.pectin*esterases.PME	at2g26440	pectinesterase family protein
252468_at	3.32953	1.73532	2.2.2.2 major CHO metabolism.degradation.starch.starch phosphorylase	at3g46970	ATPHS2 PHS2 PHS2 (ALPHA-GLUCAN PHOSPHORYLASE 2) phosphorylase/ transferase
252117_at	3.25186	1.70127	16.4.1 secondary metabolism.N misc.alkaloid-like	at3g51430	YLS2 YLS2 strictosidine synthase
257641_s_at	3.18889	1.67306	17.7.1.4 hormone metabolism.jasmonate.synthesis-degradation.allene oxidase cyclase AND 20.2.3 stress.abiotic.drought/salt	MULTIPLE HITS (at3g25760 at3g25770). At3g25760	AOC1 ERD12 AOC1 (ALLENE OXIDE CYCLASE 1) allene-oxide cyclase
250533_at	3.15856	1.65927	16.8.4.1 secondary metabolism.flavonoids.flavonols.flavonol synthase (FLS)	at5g08640	FLS FLS (FLAVONOL SYNTHASE) flavonol synthase
266225_at	3.14027	1.65089	29.3.3 protein.targeting.chloroplast	at2g28900	OEP16 ATOEP16-L ATOEP16-1 ATOEP16-1 (OUTER PLASTID ENVELOPE PROTEIN 16-1)
251705_at	3.13104	1.64664	27.3.32 RNA.regulation of transcription.WRKY domain transcription factor family	at3g56400	WRKY70 ATWRKY70 WRKY70 transcription factor/ transcription repressor
259757_at	3.06794	1.61727	21.1.1 redox.thioredoxin.PDIL	at1g77510	ATPDIL1-2 PDI6 ATPDI6 ATPDIL1-2 (PDI-LIKE 1-2)
249754_at	3.05889	1.61301	16.8.3 secondary metabolism.flavonoids.dihydroflavonols	at5g24530	DMR6 DMR6 (DOWNY MILDEW RESISTANT 6) oxidoreductase/ oxidoreductase acting on paired donors
254389_s_at	3.03054	1.59958	34.99 transport.misc	MULTIPLE HITS (at4g21903 at4g21910). At4g21903	antiporter/ drug transporter MATE efflux family protein
245265_at	2.9743	1.57255	31.5.1 cell.cell death.plants	at4g14400	ACD6 ACD6 (ACCELERATED CELL DEATH 6) protein binding
263776_s_at	2.91523	1.54361	34.22 transport.cyclic nucleotide or calcium regulated channels	MULTIPLE HITS (at2g46440,at2g46430). At2g46440	ATCNGC11 CNGC11 ATCNGC11 (CYCLIC NUCLEOTIDE-GATED CHANNELS) calmodulin binding / cation channel/ cyclic nucleotide binding / ion channel
248943_s_at	2.9064	1.53923	20.1.7 stress.biotic.PR-proteins	MULTIPLE HITS (at5g45490 at5g45440). At5g45490	disease resistance protein-related disease resistance protein-related 18412308-18413555 REVERSE
252291_s_at	2.86681	1.51945	26.12 misc.peroxidases	MULTIPLE at3g49110). at3g49120HITS (at3g49120	ATPERX34 PERX34 PRXCB
246293_at	2.86464	1.51835	29.3.3 protein.targeting.chloroplast	at3g56710	SIB1 SIB1 (SIGMA FACTOR BINDING PROTEIN 1) binding / protein binding 21006750-21007565 REVERSE
249800_at	2.82939	1.50049	33.99 development.unspecified	at5g23660	MTN3 MTN3 (Arabidopsis homolog of Medicago truncatula MTN3)
265058_s_at	2.80511	1.48806	16.5.1.3.1 secondary metabolism.sulfur-containing.glucosinolates.degradation.myrosinase AND 26.16 misc.myrosinases-lectin-jacalin	MULTIPLE HITS (at1g52040 at5g23020	MBP1 ATMBP MBP1 (MYROSINASE-BINDING PROTEIN 1) protein binding
253879_s_at	2.7691	1.46942	16.8.1 secondary metabolism.flavonoids.anthocyanins AND 26.2 misc.UDP glucosyl and glucoronyl transferases	MUL at4g27570). at4g27560TIPLE HITS (at4g27560	glycosyltransferase family protein 13759841-13761559 REVERSE at4g27570 glycosyltransferase family protein
259507_at	2.71416	1.4405	29.5.9 protein.degradation.AAA type	at1g43910	AAA-type ATPase family protein 16655884-16657658 REVERSE
249346_at	2.71223	1.43948	34.3 transport.amino acids	at5g40780	LTH1 LHT1 amino acid transmembrane transporter
252629_at	2.69092	1.4281	26.10 misc.cytochrome P450	at3g44970	cytochrome P450 family protein
255479_at	2.61255	1.38546	33.2 development.late embryogenesis abundant	at4g02380	SAG21 AtLEA5 SAG21 (SENESCENCE-ASSOCIATED GENE 21)
263847_at	2.61145	1.38485	26.2 misc.UDP glucosyl and glucoronyl transferases	at2g36970	UDP-glucoronosyl/UDP-glucosyl transferase family protein
246055_at	2.60354	1.38047	3.8.2 minor CHO metabolism.galactose.alpha-galactosidases	at5g08380	AtAGAL1 AtAGAL1 (Arabidopsis thaliana ALPHA-GALACTOSIDASE 1) alpha-galactosidase/ catalytic/ hydrolase hydrolyzing O-glycosyl compounds
259928_at	2.60019	1.37862	28.1 DNA.synthesis/chromatin structure	at1g34380	5'-3' exonuclease family protein
250517_at	2.56187	1.3572	29.5.5 protein.degradation.serine protease	at5g08260	scpl35 scpl35 (serine carboxypeptidase-like 35) serine-type carboxypeptidase 2657151-2661416 FORWARD
247216_at	2.54028	1.34499	2.2.2.4 major CHO metabolism.degradation.starch.D enzyme	at5g64860	DPE1 DPE1 (DISPROPORTIONATING ENZYME) 4-alpha-glucanotransferase/ catalytic/ cation binding
248381_at	2.51936	1.33306	2.2.1.1 major CHO metabolism.degradation.sucrose.fructokinase	at5g51830	pfkB-type carbohydrate kinase family protein
250992_at	2.51107	1.3283	10.7 cell wall.modification	at5g02260	ATEXPA9 EXP9 ATEXP9
260955_at	2.48773	1.31483	16.8.8.2 secondary metabolism.flavonoids.flavonoid glycosylations.flavonol-3-O-glycoside-rhamnosyltransferase	at1g06000	UDP-glucoronosyl/UDP-glucosyl transferase family protein
245891_at	2.48306	1.31212	34.3 transport.amino acids	at5g09220	AAP2 AAP2 (AMINO ACID PERMEASE 2) amino acid transmembrane transporter
251221_at	2.48284	1.31199	17.5.3 hormone metabolism.ethylene.induced-regulated-responsive-activated	at3g62550	universal stress protein (USP) family protein
267181_at	2.45466	1.29552	3.5 minor CHO metabolism.others	at2g37760	aldo/keto reductase family protein
264000_at	2.44653	1.29074	34.9 transport.metabolite transporters at the mitochondrial membrane	at2g22500	UCP5 ATPUMP5 DIC1 UCP5 (UNCOUPLING PROTEIN 5)
259302_at	2.44653	1.29074	17.6.2 hormone metabolism.gibberelin.signal transduction	at3g05120	ATGID1A GID1A GID1A (GA INSENSITIVE DWARF1A) hydrolase
246371_at	2.44618	1.29053	30.2.21 signalling.receptor kinases.lysine motif	at1g51940	protein kinase family protein / peptidoglycan-binding LysM domain-containing protein
254248_at	2.4432	1.28877	30.2.17 signalling.receptor kinases.DUF 26	at4g23270	protein kinase family protein
262935_at	2.43904	1.28632	34.2 transport.sugars	at1g79410	AtOCT5 AtOCT5 (Arabidopsis thaliana ORGANIC CATION/CARNITINE TRANSPORTER5) carbohydrate transmembrane transporter/ sugarhydrogen symporter
252464_at	2.43729	1.28528	29.5.11.4.2 protein.degradation.ubiquitin.E3.RING	at3g47160	protein binding / zinc ion binding
262899_at	2.43053	1.28127	34.16 transport.ABC transporters and multidrug resistance systems	at1g59870	PEN3 PDR8 ATPDR8 PEN3 (PENETRATION 3)
255980_at	2.42383	1.27729	20.1 stress.biotic	at1g33970	avirulence-responsive protein putative / avirulence induced gene protein putative / AIG protein
258063_at	2.41426	1.27158	26.10 misc.cytochrome P450	at3g14620	CYP72A8 CYP72A8 electron carrier/ heme binding / iron ion binding / monooxygenase/ oxygen binding 4914914-4917078 FORWARD
253911_at	2.40826	1.26799	30.2.24 signalling.receptor kinases.S-locus glycoprotein like	at4g27300	S-locus protein kinase putative 13669308-13672348 REVERSE
256431_s_at	2.38069	1.25138	20.1.7 stress.biotic.PR-proteins	MULTIPLE HITS (at3g11010, at5g27060). At3g11010	AtRLP34 AtRLP34 (Receptor Like Protein 34) kinase/ protein binding Symbols
256091_at	2.37954	1.25068	27.3.62 RNA.regulation of transcription.Nucleosome/chromatin assembly factor group	at1g20693	HMGB2 HMG BETA 1 NFD2
260728_at	2.37874	1.25019	29.4.1.58 protein.postranslational modification.kinase.receptor like cytoplasmatic kinase VIII	at1g48210	serine/threonine protein kinase putative 17798431-17801987 FORWARD
264083_at	2.3763	1.24872	17.5.2 hormone metabolism.ethylene.signal transduction	at2g31230	ATERF15 ATERF15 (Ethylene-responsive element binding factor 15) DNA binding / transcription activator/ transcription factor
253981_at	2.37053	1.24521	29.3.2 protein.targeting.mitochondria	at4g26670	mitochondrial import inner membrane translocase subunit Tim17/Tim22/Tim23 family protein
246620_at	2.36138	1.23963	26.10 misc.cytochrome P450	at5g36220	CYP81D1 CYP91A1 CYP81D1 (CYTOCHROME P450 81D1) electron carrier/ heme binding / iron ion binding / monooxygenase/ oxygen binding
263986_at	2.34167	1.22754	6.1 gluconeogenesis / glyoxylate cycle.citrate synthase	at2g42790	CSY3 CSY3 (citrate synthase 3) citrate (SI)-synthase
254759_at	2.33939	1.22613	26.22 misc.short chain dehydrogenase/reductase (SDR)	at4g13180	short-chain dehydrogenase/reductase (SDR) family protein
267355_at	2.32584	1.21775	33.99 development.unspecified	at2g39900	LIM domain-containing protein
250580_at	2.31443	1.21065	12.3.1 N-metabolism.N-degradation.glutamate dehydrogenase	at5g07440	GDH2 GDH2 (GLUTAMATE DEHYDROGENASE 2) ATP binding / glutamate dehydrogenase [NAD(P)+]/ glutamate dehydrogenase/ oxidoreductase
263405_s_at	2.31121	1.20865	34.99 transport.misc	MULTIPLE HITS (at2g04080 at2g04066). At2g04080	MATE efflux family protein MATE efflux protein-related
263495_at	2.27795	1.18774	20.2.2 stress.abiotic.cold	at2g42530	COR15B COR15B (COLD REGULATED 15B)
253581_at	2.26844	1.1817	20.2.3 stress.abiotic.drought/salt	at4g30660	hydrophobic protein putative / low temperature and salt responsive protein putative
256765_at	2.25503	1.17315	13.1.1.1.2 amino acid metabolism.synthesis.central amino acid metabolism.GABA.GABA transaminase	at3g22200	POP2 GABA-T HER1 POP2 (POLLEN-PISTIL INCOMPATIBILITY 2)
263249_at	2.23626	1.16109	11.2.1 lipid metabolism.FA desaturation.desaturase	at2g31360	ADS2 ADS2 (160Delta9 Arabidopsis desaturase 2) oxidoreductase
261125_at	2.22443	1.15343	27.3.11 RNA.regulation of transcription.C2H2 zinc finger family	at1g04990	zinc finger (CCCH-type) family protein
256308_s_at	2.21776	1.1491	34.16 transport.ABC transporters and multidrug resistance systems	MULTIPLE HITS (at1g30420 at1g30410). At1g30420	ATMRP12 ATMRP12 ATPase coupled to transmembrane movement of substances
258369_at	2.21079	1.14456	10.8.1 cell wall.pectin*esterases.PME	at3g14310	ATPME3 ATPME3 pectinesterase
247768_at	2.20574	1.14126	27.3.26 RNA.regulation of transcription.MYB-related transcription factor family	at5g58900	myb family transcription factor
256489_at	2.20425	1.14029	26.28 misc.GDSL-motif lipase	at1g31550	GDSL-motif lipase putative 11295525-11297379 REVERSE
251642_at	2.19862	1.1366	3.1.2.2 minor CHO metabolism.raffinose family.raffinose synthases.putative	at3g57520	AtSIP2 AtSIP2 (Arabidopsis thaliana seed imbibition 2) hydrolase hydrolyzing O-glycosyl compounds
264261_at	2.19312	1.13298	15.2 metal handling.binding, chelation and storage	at1g09240	NAS3 ATNAS3 NAS3 (NICOTIANAMINE SYNTHASE 3) nicotianamine synthase
260592_at	2.1872	1.12909	10.2.1 cell wall.cellulose synthesis.cellulose synthase	at1g55850	ATCSLE1 CSLE1 ATCSLE1 cellulose synthase/ transferase
262644_at	2.1867	1.12875	29.5.3 protein.degradation.cysteine protease	at1g62710	BETA-VPE BETAVPE BETA-VPE (BETA VACUOLAR PROCESSING ENZYME) cysteine-type endopeptidase
262314_at	2.1746	1.12075	27.3.99 RNA.regulation of transcription.unclassified	at1g70810	C2 domain-containing protein
245392_at	2.17353	1.12004	21.4 redox.glutaredoxins	at4g15680	glutaredoxin family protein
260693_at	2.17113	1.11844	34.13 transport.peptides and oligopeptides	at1g32450	NRT1.5 NRT1.5 (NITRATE TRANSPORTER 1.5) nitrate transmembrane transporter/ transporter
260549_at	2.16923	1.11719	20.1.7.6.1 stress.biotic.PR-proteins.proteinase inhibitors.trypsin inhibitor	at2g43535	trypsin inhibitor putative
262082_s_at	2.16719	1.11583	30.2.8.2 signalling.receptor kinases.leucine rich repeat VIII.VIII-2	MULTIPLE HITS (at1g56140 at1g56130)	at1g56120). at1g56140
254432_at	2.16439	1.11396	26.8 misc.nitrilases, *nitrile lyases, berberine bridge enzymes, reticuline oxidases, troponine reductases	at4g20830	FAD-binding domain-containing protein
264211_at	2.159	1.11036	33.99 development.unspecified	at1g22770	GI FB GI (GIGANTEA)
254890_at	2.15634	1.10859	21.2.2 redox.ascorbate and glutathione.glutathione	at4g11600	ATGPX6 PHGPX LSC803 ATGPX6 (GLUTATHIONE PEROXIDASE 6)
258002_at	2.15613	1.10844	20.1.3 stress.biotic.signalling	at3g28930	AIG2 AIG2 (AVRRPT2-INDUCED GENE 2)
256922_at	2.15335	1.10658	21.2 redox.ascorbate and glutathione	at3g19010	oxidoreductase 2OG-Fe(II) oxygenase family protein
252527_at	2.1492	1.1038	10.1.5 cell wall.precursor synthesis.UXS	at3g46440	UXS5 UXS5 UDP-glucuronate decarboxylase/ catalytic
245352_at	2.1473	1.10252	26.2 misc.UDP glucosyl and glucoronyl transferases	at4g15490	UGT84A3 UGT84A3 UDP-glycosyltransferase/ sinapate 1-glucosyltransferase/ transferase transferring glycosyl groups
267076_at	2.14673	1.10214	30.3 signalling.calcium	at2g41090	calmodulin-like calcium-binding protein 22 kDa (CaBP-22) 17135721-17136852 FORWARD
262092_at	2.13499	1.09423	17.2.3 hormone metabolism.auxin.induced-regulated-responsive-activated	at1g56150	auxin-responsive family protein
246281_at	2.13107	1.09158	23.3.1 nucleotide metabolism.salvage.phosphoribosyltransferases	at4g36940	NAPRT1 NAPRT1 (NICOTINATE PHOSPHORIBOSYLTRANSFERASE 1) nicotinate phosphoribosyltransferase
261285_at	2.12565	1.0879	31.1 cell.organisation	at1g35720	ANNAT1 OXY5 ATOXY5 ANNAT1 (ANNEXIN ARABIDOPSIS 1)
250625_at	2.12255	1.0858	30.3 signalling.calcium	at5g07340	calnexin putative 2317213-2319649 FORWARD
253898_s_at	2.11701	1.08202	13.1.6.5.5 amino acid metabolism.synthesis.aromatic aa.tryptophan.tryptophan synthase	MULTIPLE HITS (at5g54810 at4g27070). At5g54810	ATTSB1 TSB1 (TRYPTOPHAN SYNTHASE BETA-SUBUNIT 1)
245046_at	2.10944	1.07686	34.99 transport.misc	at2g26510	PDE135 PDE135 (pigment defective embryo 135) transmembrane transporter
258151_at	2.10674	1.07501	26.3 misc.gluco-, galacto- and mannosidases	at3g18080	BGLU44 BGLU44 (B-S GLUCOSIDASE 44) (R)-amygdalin beta-glucosidase/ 4-methylumbelliferyl-beta-D-glucopyranoside beta-glucosidase/ beta-gentiobiose beta-glucosidase/ cellobiose glucosidase/ esculin beta-glucosidase/ hydrolase hydrolyzing O-glycosyl compounds
258970_at	2.09904	1.06973	29.5.5 protein.degradation.serine protease	at3g10410	scpl49 scpl49 (serine carboxypeptidase-like 49) serine-type carboxypeptidase 3235291-3238113 REVERSE
260412_at	2.09837	1.06927	2.2.2.1.1 major CHO metabolism.degradation.starch.starch cleavage.alpha amylase	at1g69830	ATAMY3 AMY3 AMY3 (ALPHA-AMYLASE-LIKE 3) alpha-amylase
254659_at	2.09307	1.06562	2.1.2.2 major CHO metabolism.synthesis.starch.starch synthase	at4g18240	ATSS4 SSIV SS4 ATSS4
264019_at	2.09215	1.06499	31.3.1 cell.cycle.peptidylprolyl isomerase	at2g21130	peptidyl-prolyl cis-trans isomerase / cyclophilin (CYP2) / rotamase
253871_at	2.08613	1.06083	19.14 tetrapyrrole synthesis.protochlorophyllide reductase	at4g27440	PORB PORB (PROTOCHLOROPHYLLIDE OXIDOREDUCTASE B) oxidoreductase/ protochlorophyllide reductase
252166_at	2.08577	1.06058	29.4 protein.postranslational modification	at3g50500	SPK-2-2 SNRK2-2 SNRK2.2
250339_at	2.07897	1.05587	8.2.10 TCA / org transformation.other organic acid transformatons.malic	at5g11670	ATNADP-ME2 ATNADP-ME2 (NADP-malic enzyme 2) malate dehydrogenase (oxaloacetate-decarboxylating) (NADP+)/ malic enzyme/ oxidoreductase acting on NADH or NADPH
259403_at	2.07857	1.05559	13.1.5.1.1 amino acid metabolism.synthesis.serine-glycine-cysteine group.serine.phosphoglycerate dehydrogenase	at1g17745	PGDH PGDH (3-PHOSPHOGLYCERATE DEHYDROGENASE) phosphoglycerate dehydrogenase
254952_at	2.07713	1.05459	10.1.2 cell wall.precursor synthesis.UGE AND 11.9.2.1 lipid metabolism.lipid degradation.lipases.triacylglycerol lipase	MULTIPLE HITS (at4g10960 at4g10955). At4g10960	UGE5 UGE5 (UDP-D-glucose/UDP-D-galactose 4-epimerase 5) UDP-glucose 4-epimerase/ protein dimerization
251541_at	2.07518	1.05324	6.1 gluconeogenesis / glyoxylate cycle.citrate synthase	at3g58750	CSY2 CSY2 (citrate synthase 2) citrate (SI)-synthase
257832_at	2.07517	1.05323	30.11 signalling.light	at3g26740	CCL CCL (CCR-LIKE)
246288_at	2.07497	1.05309	20.2.3 stress.abiotic.drought/salt	at1g31850	dehydration-responsive protein putative
266119_at	2.0688	1.0488	20.1 stress.biotic	at2g02100	LCR69 PDF2.2 LCR69 (LOW-MOLECULAR-WEIGHT CYSTEINE-RICH 69) peptidase inhibitor
263758_s_at	2.06666	1.0473	3.5 minor CHO metabolism.others	MULTIPat3g57520 at2g21250). at2g21260LE HITS (at2g21260	mannose 6-phosphate reductase (NADPH-dependent) putative 9105583-9107380 REVERSE at2g21250
259891_at	2.0616	1.04377	29.2.3 protein.synthesis.initiation	at1g72730	eukaryotic translation initiation factor 4A putative / eIF-4A putative
247348_at	2.05414	1.03853	26.3.2 misc.gluco-, galacto- and mannosidases.beta-galactosidase	at5g63810	BGAL10 BGAL10 (beta-galactosidase 10) beta-galactosidase/ catalytic/ cation binding 25537074-25541529 FORWARD
262381_at	2.05222	1.03719	20.1.7 stress.biotic.PR-proteins	at1g72900	disease resistance protein (TIR-NBS class) putative
262797_at	2.0519	1.03696	34.2 transport.sugars	at1g20840	TMT1 TMT1 (TONOPLAST MONOSACCHARIDE TRANSPORTER1) carbohydrate transmembrane transporter/ nucleoside transmembrane transporter/ sugarhydrogen symporter
264091_at	2.04975	1.03545	29.5.11.4.2 protein.degradation.ubiquitin.E3.RING	at1g79110	protein binding / zinc ion binding
247386_at	2.04744	1.03382	33.99 development.unspecified	at5g63420	emb2746 emb2746 (embryo defective 2746) DNA binding / catalytic/ hydrolase
267592_at	2.04121	1.02943	29.5.4 protein.degradation.aspartate protease	at2g39710	aspartyl protease family protein
246785_at	2.03451	1.02468	21.2.2 redox.ascorbate and glutathione.glutathione	at5g27380	GSH2 GSHB GSH2 (GLUTATHIONE SYNTHETASE 2) glutathione synthase
248001_at	2.03175	1.02272	30.3 signalling.calcium	at5g55990	CBL2 ATCBL2 CBL2 (CALCINEURIN B-LIKE 2) calcium ion binding
246829_at	2.03138	1.02246	2.2.2.3 major CHO metabolism.degradation.starch.glucan water dikinase	at5g26570	PWD OK1 ATGWD3 ATGWD3
249582_at	2.02887	1.02068	30.3 signalling.calcium	at5g37780	CAM1 TCH1 ACAM-1 CAM1 (CALMODULIN 1)
262892_at	2.02877	1.02061	8.2.99 TCA / org transformation.other organic acid transformatons.misc	at1g79440	ALDH5F1 SSADH1 SSADH ALDH5F1
261254_at	2.02839	1.02033	27.3.6 RNA.regulation of transcription.bHLH,Basic Helix-Loop-Helix family	at1g05805	basic helix-loop-helix (bHLH) family protein
253485_at	2.01444	1.01038	27.3.32 RNA.regulation of transcription.WRKY domain transcription factor family	at4g31800	WRKY18 ATWRKY18 WRKY18 transcription factor
246791_at	2.01293	1.0093	27.3.99 RNA.regulation of transcription.unclassified	at5g27280	zinc finger (DNL type) family protein
252060_at	2.01109	1.00798	20.1 stress.biotic	at3g52430	PAD4 ATPAD4 PAD4 (PHYTOALEXIN DEFICIENT 4) lipase/ protein binding / triacylglycerol lipase
248138_at	2.01065	1.00766	5.2 fermentation.PDC	at5g54960	PDC2 PDC2 (pyruvate decarboxylase-2) carboxy-lyase/ catalytic/ magnesium ion binding / pyruvate decarboxylase/ thiamin pyrophosphate binding

## Sheet: LED100_LED200_500
Up-regulated genes in LED 200/LED500
Identifier	FC LED 200	log FC LED 200	FC LED 500	log FC LED 500	BIN	Gene ID	Annotation
259970_at	1.32882	-0.410142	3.81836	-1.93295	1.1.1.1 PS.lightreaction.photosystem II.LHC-II	at1g76570	chlorophyll A-B binding family protein
265722_at	1.64151	-0.715027	1.99444	-0.995981	1.1.1.1 PS.lightreaction.photosystem II.LHC-II	at2g40100	LHCB4.3 (light harvesting complex PSII); chlorophyll binding
244963_at	1.37162	-0.455882	1.36498	-0.448885	1.1.1.2 PS.lightreaction.photosystem II.PSII polypeptide subunits	atcg00570	PSII cytochrome b559
260036_at	1.24317	-0.314023	1.93178	-0.949932	1.1.30 PS.lightreaction.state transition AND 29.4 protein.postranslational modification	at1g68830	STN7 (Stt7 homolog STN7); kinase/ protein kinase
254848_at	1.68857	-0.755798	4.43762	-2.14979	1.1.40 PS.lightreaction.cyclic electron flow-chlororespiration	at4g11960	PGRL1B (PGR5-Like B)
258223_at	1.76542	-0.82001	2.13647	-1.09523	1.1.40 PS.lightreaction.cyclic electron flow-chlororespiration	at3g15840	PIFI (post-illumination chlorophyll fluorescence increase)
253391_at	1.32828	-0.409554	1.40179	-0.487274	1.1.5.2 PS.lightreaction.other electron carrier (ox/red).ferredoxin	at4g32590	ferredoxin-related
251218_at	1.2748	-0.350276	1.49742	-0.582481	1.3 PS.calvin cycle	at3g62410	CP12-2; protein binding
261211_at	1.91965	-0.94084	2.22643	-1.15473	10.1.2 cell wall.precursor synthesis.UGE	at1g12780	UGE1 (UDP-D-glucose/UDP-D-galactose 4-epimerase 1); UDP-glucose 4-epimerase/ protein dimerization
245478_at	1.49502	-0.580166	1.79113	-0.840873	10.1.30.2 ell wall.precursor synthesis.sugar kinases.arabinose-1-kinase	at4g16130	ARA1 (ARABINOSE KINASE); ATP binding / L-arabinokinase/ galactokinase
254185_at	1.54008	-0.623001	12.1124	-3.59842	10.2.1 cell wall.cellulose synthesis.cellulose synthase	at4g23990	ATCSLG3; cellulose synthase/ transferase/ transferase, transferring glycosyl groups
247604_at	2.05477	-1.03897	1.88503	-0.914588	10.2.2 cell wall.cellulose synthesis.COBRA	at5g60950	COBL5 (COBRA-LIKE PROTEIN 5 PRECURSOR)
246682_at	2.19857	-1.13656	3.97388	-1.99055	10.4.4.1 cell wall.pectin synthesis.Xylogalacturonan.Xylose Transferase	at5g33290	XGD1 (XYLOGALACTURONAN DEFICIENT 1); UDP-xylosyltransferase/ catalytic
252323_at	1.52413	-0.607983	1.85544	-0.891761	10.5 cell wall.cell wall proteins	at3g48530	KING1 (SNF1-RELATED PROTEIN KINASE REGULATORY SUBUNIT GAMMA 1)
247266_at	1.59961	-0.677716	1.99501	-0.996396	10.6.2 cell wall.degradation.mannan-xylose-arabinose-fucose	at5g64570	XYL4; hydrolase, hydrolyzing O-glycosyl compounds / xylan 1,4-beta-xylosidase
249275_at	1.29431	-0.372182	1.40896	-0.49463	10.6.3 cell wall.degradation.pectate lyases and polygalacturonases	at5g41870	glycoside hydrolase family 28 protein / polygalacturonase (pectinase) family protein
266070_at	4.69984	-2.23261	6.47179	-2.69416	10.7 cell wall.modification	at2g18660	EXLB3 (EXPANSIN-LIKE B3 PRECURSOR)
245052_at	3.62638	-1.85853	3.18594	-1.67172	10.8.1 cell wall.pectin*esterases.PME	at2g26440	pectinesterase family protein
248263_at	1.36831	-0.452396	1.99767	-0.99832	10.8.1 cell wall.pectin*esterases.PME	at5g53370	PMEPCRF (PECTIN METHYLESTERASE PCR FRAGMENT F); pectinesterase
246403_at	3.76476	-1.91256	21.822	-4.44771	10.8.2 cell wall.pectin*esterases.acetyl esterase	at1g57590	carboxylesterase
254573_at	1.98487	-0.989047	3.40264	-1.76665	10.8.2 cell wall.pectin*esterases.acetyl esterase	at4g19420	pectinacetylesterase family protein
246267_at	1.31956	-0.400056	1.98034	-0.985752	11.1.13 lipid metabolism.FA synthesis and FA elongation.acyl-CoA binding protein	at1g31812	ACBP6 (acyl-CoA-binding protein 6); acyl-CoA binding / phosphatidylcholine binding
253840_at	1.45688	-0.542879	2.33484	-1.22332	11.1.13 lipid metabolism.FA synthesis and FA elongation.acyl-CoA binding protein	at4g27780	ACBP2 (ACYL-COA BINDING PROTEIN ACBP 2); acyl-CoA binding / lead ion binding
252293_at	1.40128	-0.486745	1.48955	-0.574874	11.1.8 lipid metabolism.FA synthesis and FA elongation.acyl coa ligase	at3g48990	AMP-dependent synthetase and ligase family protein
259545_at	1.62221	-0.697964	3.13319	-1.64763	11.1.8 lipid metabolism.FA synthesis and FA elongation.acyl coa ligase	at1g20560	AAE1 (ACYL ACTIVATING ENZYME 1); AMP binding
259568_at	1.60832	-0.685553	3.04462	-1.60626	11.1.8 lipid metabolism.FA synthesis and FA elongation.acyl coa ligase	at1g20490	AMP-dependent synthetase and ligase family protein
246789_at	2.35319	-1.23462	7.29153	-2.86622	11.1.9 lipid metabolism.FA synthesis and FA elongation.long chain fatty acid CoA ligase	at5g27600	LACS7 (LONG-CHAIN ACYL-COA SYNTHETASE 7); long-chain-fatty-acid-CoA ligase/ protein binding
254192_at	1.29809	-0.376392	1.86986	-0.902932	11.1.9 lipid metabolism.FA synthesis and FA elongation.long chain fatty acid CoA ligase	at4g23850	long-chain-fatty-acid--CoA ligase / long-chain acyl-CoA synthetase
246075_at	1.35237	-0.435486	1.94702	-0.961265	11.10.1 lipid metabolism.glycolipid synthesis.MGDG synthase	at5g20410	MGD2; 1,2-diacylglycerol 3-beta-galactosyltransferase/ UDP-galactosyltransferase/ transferase, transferring glycosyl gro
255681_at	1.33221	-0.413821	1.61044	-0.687451	11.10.2 lipid metabolism.glycolipid synthesis.DGDG synthase	at4g00550	DGD2; UDP-galactosyltransferase/ UDP-glycosyltransferase/ digalactosyldiacylglycerol synthase/ transferase, transferring glycosy
254998_at	3.11589	-1.63965	3.91004	-1.96718	11.3.2 lipid metabolism.Phospholipid synthesis.choline kinase	at4g09760	choline kinase, putative
261506_at	1.4518	-0.537843	1.58436	-0.663902	11.3.2 lipid metabolism.Phospholipid synthesis.choline kinase	at1g71697	ATCK1 (CHOLINE KINASE 1); choline kinase
266359_at	1.45924	-0.545218	2.38007	-1.251	11.3.6 lipid metabolism.Phospholipid synthesis.choline-phosphate cytidylyltransferase	at2g32260	cholinephosphate cytidylyltransferase, putative / phosphorylcholine transferase, putative / CTP
254035_at	1.31172	-0.391464	2.18066	-1.12476	11.3.8 lipid metabolism.Phospholipid synthesis.phosphatidylserine decarboxylase	at4g25970	PSD3 (phosphatidylserine decarboxylase 3); phosphatidylserine decarboxylase
253701_at	1.51436	-0.598708	1.67454	-0.743767	11.3.9 lipid metabolism.Phospholipid synthesis.choline monooxygenase	at4g29890	choline monooxygenase, putative (CMO-like)
260274_at	1.4979	-0.582942	1.65285	-0.724955	11.5.1 lipid metabolism.glyceral metabolism.glycerol kinase	at1g80460	NHO1 (nonhost resistance to P. s. phaseolicola 1); carbohydrate kinase/ glycerol kinase
247717_at	9.4087	-3.234	23.1057	-4.53018	11.6 lipid metabolism.lipid transfer proteins etc	at5g59320	LTP3 (LIPID TRANSFER PROTEIN 3); lipid binding
247718_at	11.6362	-3.54055	30.913	-4.95014	11.6 lipid metabolism.lipid transfer proteins etc	at5g59310	LTP4 (LIPID TRANSFER PROTEIN 4); lipid binding
258038_at	1.47341	-0.559163	1.93867	-0.955068	11.6 lipid metabolism.lipid transfer proteins etc	at3g21260	glycolipid transfer protein-related
255583_at	1.59038	-0.669371	1.8505	-0.887917	11.7 lipid metabolism.unassigned	at4g01510	ARV2
249178_at	1.51923	-0.60334	1.6935	-0.760005	11.8 lipid metabolism.'exotics'(steroids, squalene etc)	at5g42890	SCP2 (STEROL CARRIER PROTEIN 2); oxidoreductase/ sterol carrier
253909_at	1.42085	-0.506753	1.35761	-0.441065	11.8 lipid metabolism.'exotics'(steroids, squalene etc)	at4g27270	quinone reductase family protein
261771_at	1.53607	-0.619241	2.53414	-1.3415	11.8 lipid metabolism.'exotics'(steroids, squalene etc)	at1g76150	maoC-like dehydratase domain-containing protein
259598_at	2.25776	-1.17489	5.30467	-2.40726	11.8.1 lipid metabolism.'exotics' (steroids, squalene etc).sphingolipids	at1g27980	DPL1; carboxy-lyase/ catalytic/ pyridoxal phosphate binding
261071_at	1.49245	-0.577681	2.37516	-1.24802	11.8.1.1 lipid metabolism.'exotics' (steroids, squalene etc).sphingolipids.ceramidase	at1g07380	ceramidase family protein
250253_at	1.32296	-0.403773	1.73393	-0.794045	11.8.10 lipid metabolism.'exotics' (steroids, squalene etc).phosphatidylcholinesterol O-acyltransferase	at5g13640	ATPDAT; phosphatidylcholine-sterol O-acyltransferase
254547_at	1.71958	-0.782055	2.20859	-1.14313	11.8.10 lipid metabolism.'exotics' (steroids, squalene etc).phosphatidylcholinesterol O-acyltransferase	at4g19860	lecithin:cholesterol acyltransferase family protein / LACT family protein
248812_at	1.62562	-0.700992	3.47408	-1.79663	11.9.1 lipid metabolism.lipid degradation.palmitoyl[protein] hydrolase	at5g47330	palmitoyl protein thioesterase family protein
251191_at	1.43427	-0.520316	3.91198	-1.9679	11.9.2.1 lipid metabolism.lipid degradation.lipases.triacylglycerol lipase	at3g62590	lipase class 3 family protein
257006_at	1.40443	-0.489985	1.53715	-0.620258	11.9.2.1 lipid metabolism.lipid degradation.lipases.triacylglycerol lipase	at3g14075	lipase class 3 family protein
260491_at	1.55335	-0.635379	1.91265	-0.935572	11.9.2.1 lipid metabolism.lipid degradation.lipases.triacylglycerol lipase	at1g51440	lipase class 3 family protein
263359_at	1.43412	-0.520168	1.77738	-0.829753	11.9.2.1 lipid metabolism.lipid degradation.lipases.triacylglycerol lipase	at2g15230	ATLIP1 (Arabidopsis thaliana lipase 1); galactolipase/ hydrolase/ phospholipase/ triacylglycerol lipase
266983_at	2.31687	-1.21218	1.63699	-0.711048	11.9.2.2 lipid metabolism.lipid degradation.lipases.acylglycerol lipase	at2g39400	hydrolase, alpha/beta fold family protein
253220_s_at	1.58404	-0.663606	1.6384	-0.712287	11.9.3 lipid metabolism.lipid degradation.lysophospholipases	MULTIPLE HITS	ATARD1 (ACIREDUCTONE DIOXYGENASE 1); acireductone dioxygenase [iron(II)-requiring]/ metal
259708_at	1.58358	-0.663193	3.60074	-1.84829	11.9.3 lipid metabolism.lipid degradation.lysophospholipases	at1g77420	hydrolase, alpha/beta fold family protein
258270_at	2.16562	-1.11478	15.8471	-3.98614	11.9.3.2 lipid metabolism.lipid degradation.lysophospholipases.carboxylesterase	at3g15650	phospholipase/carboxylesterase family protein
260254_at	2.1798	-1.12419	6.8482	-2.77572	11.9.3.3 lipid metabolism.lipid degradation.lysophospholipases.glycerophosphodiester phosphodiesterase	at1g74210	glycerophosphoryl diester phosphodiesterase family protein
246304_at	1.25065	-0.322681	1.36542	-0.449345	11.9.4.2 lipid metabolism.lipid degradation.beta-oxidation.acyl CoA DH	at3g51840	ACX4 (ACYL-COA OXIDASE 4); acyl-CoA oxidase/ oxidoreductase
254776_at	1.34402	-0.426559	1.67951	-0.748042	11.9.4.3 lipid metabolism.lipid degradation.beta-oxidation.enoyl CoA hydratase AND 13.2.6.3 amino acid metabolism.degradation.aromatic aa.tryptophan	at4g13360	catalytic
245484_at	1.45317	-0.539207	2.98881	-1.57957	11.9.4.4 lipid metabolism.lipid degradation.beta-oxidation.hydroxybutyryl CoA DH AND 13.2.6.3 amino acid metabolism.degradation.aromatic aa.tryptophan	at4g16210	ECHIA (ENOYL-COA HYDRATASE/ISOMERASE A); catalytic
265699_at	1.71136	-0.775144	2.41381	-1.27131	11.9.4.5 lipid metabolism.lipid degradation.beta-oxidation.acyl-CoA thioesterase	at2g03550	hydrolase
253759_at	1.27235	-0.347501	2.19073	-1.13141	11.9.4.9 lipid metabolism.lipid degradation.beta-oxidation.multifunctional	at4g29010	AIM1 (ABNORMAL INFLORESCENCE MERISTEM); enoyl-CoA hydratase
258555_at	1.6495	-0.722032	3.32372	-1.7328	11.9.4.9 lipid metabolism.lipid degradation.beta-oxidation.multifunctional	at3g06860	MFP2 (MULTIFUNCTIONAL PROTEIN 2); 3-hydroxyacyl-CoA dehydrogenase/ enoyl-CoA hydratase
266365_at	1.77491	-0.827746	4.75316	-2.24889	12.2.1.1 N-metabolism.ammonia metabolism.glutamate synthase.ferredoxin dependent	at2g41220	GLU2 (GLUTAMATE SYNTHASE 2); glutamate synthase (ferredoxin)
249581_at	2.35358	-1.23485	8.17141	-3.03058	12.2.2 N-metabolism.ammonia metabolism.glutamine synthetase	at5g37600	ATGSR1; copper ion binding / glutamate-ammonia ligase
250100_at	2.02924	-1.02094	6.06921	-2.60151	12.2.2 N-metabolism.ammonia metabolism.glutamine synthetase	at5g16570	GLN1;4; glutamate-ammonia ligase
256524_at	1.40595	-0.491545	1.34714	-0.429903	12.2.2 N-metabolism.ammonia metabolism.glutamine synthetase	at1g66200	ATGSR2; copper ion binding / glutamate-ammonia ligase
250580_at	1.87173	-0.904371	4.015	-2.0054	12.3.1 N-metabolism.N-degradation.glutamate dehydrogenase	at5g07440	GDH2 (GLUTAMATE DEHYDROGENASE 2); ATP binding / glutamate dehydrogenase [NAD(P)+]/ glutamate dehydrogenase/ oxidoreductase
250861_at	1.3332	-0.414895	1.65595	-0.72766	13 amino acid metabolism	at5g04740	ACT domain-containing protein
250090_at	1.64667	-0.719552	4.78842	-2.25955	13.1.1.1.1 amino acid metabolism.synthesis.central amino acid metabolism.GABA.Glutamate decarboxylase	at5g17330	GAD; calmodulin binding / glutamate decarboxylase
245951_at	1.34155	-0.4239	1.7232	-0.785089	13.1.1.2.1 amino acid metabolism.synthesis.central amino acid metabolism.aspartate.aspartate aminotransferase	at5g19550	ASP2 (ASPARTATE AMINOTRANSFERASE 2); L-aspartate
262988_at	1.23838	-0.308454	1.20806	-0.27269	13.1.1.3.1 amino acid metabolism.synthesis.central amino acid metabolism.alanine.alanine aminotransferase	at1g23310	GGT1 (GLUTAMATE :GLYOXYLATE AMINOTRANSFERASE); L-alanine:2-oxoglutarate aminotransferase/ glycine:2-oxoglutarate aminotransferase
262582_at	1.55305	-0.6351	5.41863	-2.43793	13.1.2.3.31 amino acid metabolism.synthesis.glutamate family.arginine.aspartate racemase	at1g15410	aspartate-glutamate racemase family
252974_at	1.26271	-0.336522	1.46097	-0.546923	13.1.3.4 amino acid metabolism.synthesis.aspartate family.methionine	at4g38800	ATMTN1; catalytic/ methylthioadenosine nucleosidase
258417_at	1.55973	-0.641296	2.29902	-1.20102	13.1.3.4.12 amino acid metabolism.synthesis.aspartate family.methionine.homocysteine S-methyltransferase	at3g17365	catalytic/ methyltransferase
259403_at	1.70991	-0.773923	6.05123	-2.59723	13.1.5.1.1 amino acid metabolism.synthesis.serine-glycine-cysteine group.serine.phosphoglycerate dehydrogenase	at1g17745	PGDH (3-PHOSPHOGLYCERATE DEHYDROGENASE); phosphoglycerate dehydrogenase
247138_at	1.23209	-0.301112	1.57177	-0.652393	13.1.6.1.2 amino acid metabolism.synthesis.aromatic aa.chorismate.3-dehydroquinate synthase AND 18.5 Co-factor and vitamine metabolism.folate & vitamine K	at5g66120	3-dehydroquinate synthase, putative
263897_at	1.40609	-0.491693	2.8114	-1.49129	13.1.6.1.5 amino acid metabolism.synthesis.aromatic aa.chorismate.shikimate kinase	at2g21940	shikimate kinase, putative
260328_at	1.36785	-0.451913	2.03265	-1.02336	13.1.6.2 amino acid metabolism.synthesis.aromatic aa.phenylalanine and tyrosine	at1g80360	aminotransferase class I and II family protein
250407_at	1.39879	-0.484183	1.96655	-0.975663	13.1.6.2.1 amino acid metabolism.synthesis.aromatic aa.phenylalanine and tyrosine.chorismate mutase	at5g10870	ATCM2 (chorismate mutase 2); chorismate mutase
248879_at	1.73036	-0.791071	3.39002	-1.76129	13.2.2.3 amino acid metabolism.degradation.glutamate family.arginine	at5g46180	delta-OAT; ornithine-oxo-acid transaminase
260189_at	1.65122	-0.72353	1.51151	-0.595995	13.2.2.3 amino acid metabolism.degradation.glutamate family.arginine	at1g67550	URE (UREASE); urease
267001_at	1.40338	-0.488908	2.33043	-1.2206	13.2.2.3 amino acid metabolism.degradation.glutamate family.arginine	at2g34470	UREG (UREASE ACCESSORY PROTEIN G); ATP binding / metal ion binding / nickel ion binding / nucleotide binding
258338_at	2.24116	-1.16425	9.49959	-3.24787	13.2.3.1.1 amino acid metabolism.degradation.aspartate family.asparagine.L-asparaginase	at3g16150	L-asparaginase, putative / L-asparagine amidohydrolase, putative
245168_at	1.43532	-0.52137	2.17118	-1.11848	13.2.4.1 amino acid metabolism.degradation.branched chain group.shared	at2g33150	PKT3 (PEROXISOMAL 3-KETOACYL-COA THIOLASE 3); acetyl-CoA C-acyltransferase
263118_at	1.46332	-0.549248	1.56062	-0.642115	13.2.4.4 amino acid metabolism.degradation.branched chain group.leucine	at1g03090	MCCA; methylcrotonoyl-CoA carboxylase
248779_at	1.35771	-0.441176	2.15867	-1.11014	13.2.4.5 amino acid metabolism.degradation.branched chain group.isoleucine AND 13.2.6.3 amino acid metabolism.degradation.aromatic aa.tryptophan AND 16.1.2.1 secondary metabolism.isoprenoids.mevalonate pathway.acetyl-CoA C-acyltransferase	at5g47720	acetyl-CoA C-acyltransferase, putative / 3-ketoacyl-CoA thiolase, putative
248193_at	1.76325	-0.818238	4.69987	-2.23262	13.2.6.2 amino acid metabolism.degradation.aromatic aa.tyrosine	at5g54080	HGO (HOMOGENTISATE 1,2-DIOXYGENASE); homogentisate 1,2-dioxygenase
264396_at	1.44107	-0.527139	2.8843	-1.52822	13.2.6.2 amino acid metabolism.degradation.aromatic aa.tyrosine	at1g12050	fumarylacetoacetase, putative
259819_at	1.46359	-0.549512	2.81201	-1.4916	13.99 amino acid metabolism.misc	at1g49820	ATMTK (ARABIDOPSIS THALIANA S-METHYL-5-THIORIBOSE KINASE); S-methyl-5-thioribose kinase
247005_at	1.72969	-0.790512	3.71146	-1.89199	14.15 S-assimilation.AKN	at5g67520	adenylylsulfate kinase, putative
267112_at	1.77216	-0.825508	1.71703	-0.779914	14.15 S-assimilation.AKN	at2g14750	APK (APS KINASE); ATP binding / adenylylsulfate kinase/ kinase/ transferase, transferring phosphorus-containing gro
249922_at	1.86202	-0.896869	3.48722	-1.80208	15 metal handling	at5g19140	AILP1
261317_at	1.73967	-0.798813	1.95869	-0.969891	15.1 metal handling.acquisition	at1g53030	cytochrome c oxidase copper chaperone family protein
250991_at	1.28094	-0.357201	1.61446	-0.691051	15.2 metal handling.binding, chelation and storage	at5g02380	MT2B (METALLOTHIONEIN 2B); copper ion binding
251109_at	4.09065	-2.03233	3.69089	-1.88397	15.2 metal handling.binding, chelation and storage	at5g01600	ATFER1; ferric iron binding / iron ion binding
251733_at	1.49904	-0.584044	2.02803	-1.02008	15.2 metal handling.binding, chelation and storage	at3g56240	CCH (COPPER CHAPERONE); copper chaperone
252956_at	1.41215	-0.497895	2.5182	-1.3324	15.2 metal handling.binding, chelation and storage	at4g38580	ATFP6 (FARNESYLATED PROTEIN 6); metal ion binding
257054_at	1.76722	-0.821484	2.85638	-1.51419	15.2 metal handling.binding, chelation and storage	at3g15353	MT3 (METALLOTHIONEIN 3); copper ion binding
259008_at	2.25683	-1.1743	5.62837	-2.49272	15.2 metal handling.binding, chelation and storage	at3g09390	MT2A (METALLOTHIONEIN 2A); copper ion binding
259824_at	1.36116	-0.444834	2.22369	-1.15296	15.2 metal handling.binding, chelation and storage	at1g66240	ATX1 (ARABIDOPSIS HOMOLOG OF ANTI-OXIDANT 1); metal ion binding
264261_at	2.16762	-1.11611	2.32664	-1.21825	15.2 metal handling.binding, chelation and storage	at1g09240	NAS3 (NICOTIANAMINE SYNTHASE 3); nicotianamine synthase
261438_at	1.29729	-0.375499	1.42555	-0.511514	15.2 metal handling.binding, chelation and storage AND 27.3.67 RNA.regulation of transcription.putative transcription regulator	MULTIPLE HITS	ATARD1 (ACIREDUCTONE DIOXYGENASE 1); acireductone dioxygenase [iron(II)-requiring]/ metal
245373_s_at	1.60689	-0.684267	2.66654	-1.41497	15.3 metal handling.regulation	MULTIPLE HITS	ATARD1 (ACIREDUCTONE DIOXYGENASE 1); acireductone dioxygenase [iron(II)-requiring]/ metal
250313_at	1.29129	-0.368817	2.09344	-1.06588	16.1.1 secondary metabolism.isoprenoids.non-mevalonate pathway	at5g12210	geranylgeranyl transferase type II beta subunit, putative / RAB geranylgeranyltransferase beta subunit, putative
266985_at	1.32628	-0.407387	1.50611	-0.590823	16.1.1 secondary metabolism.isoprenoids.non-mevalonate pathway	at2g39550	PGGT-I; CAAX-protein geranylgeranyltransferase/ protein heterodimerization
252996_s_at	1.51031	-0.594844	2.23305	-1.15902	16.1.1.10 secondary metabolism.isoprenoids.non-mevalonate pathway.geranylgeranyl pyrophosphate synthase	at4g38460	GGR (geranylgeranyl reductase); farnesyltranstransferase
247637_at	1.27966	-0.355758	2.18199	-1.12565	16.1.1.6 secondary metabolism.isoprenoids.non-mevalonate pathway.HDS	at5g60600	HDS (4-HYDROXY-3-METHYLBUT-2-ENYL DIPHOSPHATE SYNTHASE); 4 iron, 4 sulfur cluster binding / 4-hydroxy-3-m
262875_at	1.36309	-0.446879	2.89155	-1.53184	16.1.3.5 secondary metabolism.isoprenoids.tocopherol biosynthesis.tocopherol methyltransferase	at1g64970	G-TMT (GAMMA-TOCOPHEROL METHYLTRANSFERASE); tocopherol O-methyltransferase
251146_at	1.28345	-0.360033	1.8007	-0.848557	16.1.4.10 secondary metabolism.isoprenoids.carotenoids.carotenoid cleavage dioxygenase	at3g63520	CCD1 (CAROTENOID CLEAVAGE DIOXYGENASE 1); 9-cis-epoxycarotenoid dioxygenase
264100_at	3.4208	-1.77433	1.85348	-0.890235	16.1.5 secondary metabolism.isoprenoids.terpenoids	at1g78970	LUP1 (LUPEOL SYNTHASE 1); beta-amyrin synthase/ lupeol synthase
247040_at	1.57217	-0.652759	1.81505	-0.86001	16.2 secondary metabolism.phenylpropanoids	at5g67150	transferase family protein
249849_at	1.62264	-0.698345	2.16407	-1.11375	16.2 secondary metabolism.phenylpropanoids	at5g23230	NIC2 (NICOTINAMIDASE 2); catalytic/ nicotinamidase
251144_at	1.66722	-0.737441	1.81729	-0.861791	16.2 secondary metabolism.phenylpropanoids	at5g01210	transferase family protein
259518_at	1.71879	-0.781391	2.92974	-1.55077	16.2 secondary metabolism.phenylpropanoids	at1g20510	OPCL1 (OPC-8
252183_at	1.5352	-0.618422	2.70206	-1.43406	16.2.1 secondary metabolism.phenylpropanoids.lignin biosynthesis	at3g50740	UGT72E1 (UDP-glucosyl transferase 72E1); UDP-glycosyltransferase/ coniferyl-alcohol glucosyltransferase/ transferase, transfe
258037_at	2.17514	-1.12111	3.59616	-1.84646	16.2.1.3 secondary metabolism.phenylpropanoids.lignin biosynthesis.4CL	at3g21230	4CL5 (4-coumarate
253276_at	1.22549	-0.293359	2.11179	-1.07846	16.2.1.6 secondary metabolism.phenylpropanoids.lignin biosynthesis.CCoAOMT	at4g34050	caffeoyl-CoA 3-O-methyltransferase, putative
245756_at	1.62395	-0.699506	3.89141	-1.96029	16.4.1 secondary metabolism.N misc.alkaloid-like	at1g35190	oxidoreductase, 2OG-Fe(II) oxygenase family protein
252068_at	1.96314	-0.973162	3.05561	-1.61146	16.4.1 secondary metabolism.N misc.alkaloid-like	at3g51440	strictosidine synthase family protein
252117_at	3.41806	-1.77318	6.08188	-2.60452	16.4.1 secondary metabolism.N misc.alkaloid-like	at3g51430	YLS2; strictosidine synthase
265122_at	1.89084	-0.919026	6.1961	-2.63136	16.5.1.1.1.10 secondary metabolism.sulfur-containing.glucosinolates.synthesis.aliphatic.flavin-containing monooxygenase AND 26.7 misc.oxidases - copper, flavone etc	at1g62540	FMO GS-OX2 (FLAVIN-MONOOXYGENASE GLUCOSINOLATE S-OXYGENASE 2); 3-methylthiopropyl glucosinolate S-oxygenase/ 4-methylthiop
267392_at	1.82308	-0.866375	1.84389	-0.882751	16.5.1.3.1 secondary metabolism.sulfur-containing.glucosinolates.degradation.myrosinase AND 20.1 stress.biotic	at2g44490	PEN2 (PENETRATION 2); hydrolase, hydrolyzing O-glycosyl compounds / thioglucosidase
249942_at	2.52903	-1.33859	4.77231	-2.25469	16.5.1.3.3 secondary metabolism.sulfur-containing.glucosinolates.degradation.nitrilase AND 26.8 misc.nitrilases, *nitrile lyases, berberine bridge enzymes, reticuline oxidases, troponine reductases	at5g22300	NIT4 (NITRILASE 4); 3-cyanoalanine hydratase/ cyanoalanine nitrilase/ indole-3-acetonitrile nitrilase/ nitrilase/ nitrile hydrat
256008_s_at	3.90621	-1.96577	54.1388	-5.75859	16.5.99.1 secondary metabolism.sulfur-containing.misc.alliinase	MULTIPLE HITS	ATARD1 (ACIREDUCTONE DIOXYGENASE 1); acireductone dioxygenase [iron(II)-requiring]/ metal
254283_s_at	3.06131	-1.61415	35.2929	-5.1413	16.8.1.1 secondary metabolism.flavonoids.anthocyanins.leucocyanidin dioxygenase	MULTIPLE HITS	ATARD1 (ACIREDUCTONE DIOXYGENASE 1); acireductone dioxygenase [iron(II)-requiring]/ metal
249754_at	2.73759	-1.45291	2.48755	-1.31473	16.8.3 secondary metabolism.flavonoids.dihydroflavonols	at5g24530	DMR6 (DOWNY MILDEW RESISTANT 6); oxidoreductase/ oxidoreductase, acting on paired donors, with incorporation or reduction of mol
261046_at	1.36299	-0.446777	1.71818	-0.78088	16.8.3 secondary metabolism.flavonoids.dihydroflavonols	at1g01390	UDP-glucoronosyl/UDP-glucosyl transferase family protein
263135_at	2.32887	-1.21963	1.81554	-0.860399	16.8.3 secondary metabolism.flavonoids.dihydroflavonols	at1g78550	oxidoreductase, 2OG-Fe(II) oxygenase family protein
249215_at	2.89105	-1.53159	51.6009	-5.68932	16.8.3.1 secondary metabolism.flavonoids.dihydroflavonols.dihydroflavonol 4-reductase	at5g42800	DFR (DIHYDROFLAVONOL 4-REDUCTASE); dihydrokaempferol 4-reductase
254834_at	1.50452	-0.589306	3.57402	-1.83755	16.8.3.3 secondary metabolism.flavonoids.dihydroflavonols.flavonoid 3''-monooxygenase	at4g12300	CYP706A4; electron carrier/ heme binding / iron ion binding / monooxygenase/ oxygen binding
248330_at	2.16378	-1.11356	3.16793	-1.66354	16.99 secondary metabolism.unspecified	at5g52810	ornithine cyclodeaminase/mu-crystallin family protein
254564_at	2.3709	-1.24543	2.33942	-1.22615	17.1.1.1.10 hormone metabolism.abscisic acid.synthesis-degradation.synthesis.9-cis-epoxycarotenoid dioxygenase	at4g19170	NCED4 (NINE-CIS-EPOXYCAROTENOID DIOXYGENASE 4)
251169_at	1.87351	-0.905743	2.78833	-1.4794	17.1.2 hormone metabolism.abscisic acid.signal transduction	at3g63210	MARD1
258610_at	1.6029	-0.680685	4.01086	-2.00391	17.2.1 hormone metabolism.auxin.synthesis-degradation	at3g02875	ILR1 (IAA-LEUCINE RESISTANT 1); IAA-Leu conjugate hydrolase/ IAA-Phe conjugate hydrolase/ metallopeptidase
251291_at	1.48494	-0.570408	2.2476	-1.16838	17.2.3 hormone metabolism.auxin.induced-regulated-responsive-activated	at3g61900	auxin-responsive family protein
253103_at	2.09591	-1.06758	2.5282	-1.33811	17.2.3 hormone metabolism.auxin.induced-regulated-responsive-activated	at4g36110	auxin-responsive protein, putative
253207_at	1.72974	-0.790558	0.676475	0.563892	17.2.3 hormone metabolism.auxin.induced-regulated-responsive-activated	at4g34770	auxin-responsive family protein
253874_at	3.37296	-1.75401	2.41486	-1.27194	17.2.3 hormone metabolism.auxin.induced-regulated-responsive-activated	at4g27450	unknown protein
255645_at	1.99476	-0.996218	2.1565	-1.10869	17.2.3 hormone metabolism.auxin.induced-regulated-responsive-activated	at4g00880	auxin-responsive family protein
264016_at	1.39734	-0.48268	0.629795	0.667045	17.2.3 hormone metabolism.auxin.induced-regulated-responsive-activated	at2g21220	auxin-responsive protein, putative
266322_at	1.47514	-0.560856	2.12535	-1.0877	17.2.3 hormone metabolism.auxin.induced-regulated-responsive-activated	at2g46690	auxin-responsive family protein
249774_at	1.54233	-0.625111	1.94401	-0.959036	17.3.1.2.99 hormone metabolism.brassinosteroid.synthesis-degradation.sterols.other	at5g24150	SQP1; squalene monooxygenase
261109_at	1.43695	-0.52301	1.97713	-0.983407	17.4.1 hormone metabolism.cytokinin.synthesis-degradation	at1g75450	CKX5 (CYTOKININ OXIDASE 5); cytokinin dehydrogenase
246098_at	1.66818	-0.738277	1.81079	-0.856616	17.5.1 hormone metabolism.ethylene.synthesis-degradation	at5g20400	oxidoreductase, 2OG-Fe(II) oxygenase family protein
249125_at	1.30507	-0.384128	2.7489	-1.45885	17.5.1 hormone metabolism.ethylene.synthesis-degradation	at5g43450	2-oxoglutarate-dependent dioxygenase, putative
262247_at	1.52869	-0.612294	2.12217	-1.08554	17.5.1 hormone metabolism.ethylene.synthesis-degradation	at1g48420	D-CDES (D-CYSTEINE DESULFHYDRASE); 1-aminocyclopropane-1-carboxylate deaminase/ D-cysteine desulfhydrase/ catalytic
264843_at	1.49845	-0.583468	1.79969	-0.847752	17.5.1 hormone metabolism.ethylene.synthesis-degradation	at1g03400	2-oxoglutarate-dependent dioxygenase, putative
260637_at	1.37136	-0.455611	1.77465	-0.827534	17.5.1.2 hormone metabolism.ethylene.synthesis-degradation.1-aminocyclopropane-1-carboxylate oxidase	at1g62380	ACO2 (ACC OXIDASE 2); 1-aminocyclopropane-1-carboxylate oxidase
245098_at	1.72136	-0.783546	1.49267	-0.577899	17.5.2 hormone metabolism.ethylene.signal transduction	at2g40940	ERS1 (ETHYLENE RESPONSE SENSOR 1); ethylene binding / protein histidine kinase/ receptor
264083_at	1.75711	-0.813206	2.13188	-1.09213	17.5.2 hormone metabolism.ethylene.signal transduction	at2g31230	ATERF15 (Ethylene-responsive element binding factor 15); DNA binding / transcription activator/ transcription factor
251221_at	4.4785	-2.16302	3.6865	-1.88225	17.5.3 hormone metabolism.ethylene.induced-regulated-responsive-activated	at3g62550	universal stress protein (USP) family protein
254434_at	1.51989	-0.603971	2.60817	-1.38304	17.5.3 hormone metabolism.ethylene.induced-regulated-responsive-activated	at4g20880	ethylene-responsive nuclear protein / ethylene-regulated nuclear protein (ERT2)
258133_at	1.67783	-0.746593	6.21602	-2.63599	17.5.3 hormone metabolism.ethylene.induced-regulated-responsive-activated	at3g24500	MBF1C (MULTIPROTEIN BRIDGING FACTOR 1C); DNA binding / transcription coactivator/ transcription factor
263978_at	1.48355	-0.569052	1.75918	-0.8149	17.5.3 hormone metabolism.ethylene.induced-regulated-responsive-activated	at2g42680	MBF1A (MULTIPROTEIN BRIDGING FACTOR 1A); DNA binding / transcription coactivator
245307_at	1.68609	-0.753682	2.62457	-1.39208	17.6.1 hormone metabolism.gibberelin.synthesis-degradation	at4g16770
264586_at	1.48787	-0.573246	1.27657	-0.352269	17.6.1.4 hormone metabolism.gibberelin.synthesis-degradation.ent-kaurenoic acid hydroxylase/oxygenase	at1g05160	CYP88A3 (CYTOCHROME P450 88 A3); ent-kaurenoate oxidase/ oxygen binding
266613_at	2.12035	-1.08431	1.82233	-0.865786	17.6.3 hormone metabolism.gibberelin.induced-regulated-responsive-activated	at2g14900	gibberellin-regulated family protein
256321_at	1.39583	-0.481125	1.85599	-0.892188	17.7.1.2 hormone metabolism.jasmonate.synthesis-degradation.lipoxygenase	at1g55020	LOX1; lipoxygenase
265530_at	2.02146	-1.0154	5.35621	-2.42121	17.7.1.5 hormone metabolism.jasmonate.synthesis-degradation.12-Oxo-PDA-reductase	at2g06050	OPR3 (OPDA-REDUCTASE 3); 12-oxophytodienoate reductase
265458_at	1.27599	-0.351613	1.52022	-0.604276	18 Co-factor and vitamine metabolism	at2g46580	pyridoxine 5'-phosphate oxidase-related
265738_at	1.25174	-0.323932	1.72439	-0.786085	18 Co-factor and vitamine metabolism	at2g01350	QPT (QUINOLINATE PHOSHORIBOSYLTRANSFERASE); nicotinate-nucleotide diphosphorylase (carboxylating)
255017_at	1.37885	-0.463466	1.99004	-0.992797	18.1 Co-factor and vitamine metabolism.molybdenum cofactor	at4g10100	CNX7; catalytic
258052_at	1.52293	-0.606846	2.7533	-1.46116	18.13 Co-factor and vitamine metabolism.isochorismatase	at3g16190	isochorismatase hydrolase family protein
264244_at	1.23049	-0.29923	1.79365	-0.842901	18.4.5 Co-factor and vitamine metabolism.pantothenate.pantothenate kinase (PANK)	at1g60440	ATPANK1 (PANTOTHENATE KINASE 1); pantothenate kinase
245193_at	1.86046	-0.895657	2.22488	-1.15373	18.7 Co-factor and vitamine metabolism.iron-sulphur clusters	at1g67810	SUFE2 (SULFUR E 2); enzyme activator
265358_at	1.44054	-0.526614	1.90967	-0.933324	18.7 Co-factor and vitamine metabolism.iron-sulphur clusters	at2g16710	hesB-like domain-containing protein
260396_at	2.53023	-1.33927	4.52799	-2.17887	19.21 tetrapyrrole synthesis.heme oxygenase	at1g69720	ho3 (HEME OXYGENASE 3); heme oxygenase (decyclizing)
249091_at	1.25603	-0.328867	1.47737	-0.563028	19.99 tetrapyrrole synthesis.unspecified	at5g43860	ATCLH2; chlorophyllase
267356_at	1.77477	-0.827634	1.71392	-0.777303	2.1.2.4 major CHO metabolism.synthesis.starch.debranching	at2g39930	ISA1 (ISOAMYLASE 1); alpha-amylase/ isoamylase
263250_at	1.45152	-0.537566	2.29466	-1.19828	2.2.1.1 major CHO metabolism.degradation.sucrose.fructokinase	at2g31390	pfkB-type carbohydrate kinase family protein
249898_at	1.27944	-0.35551	1.92526	-0.94505	2.2.1.3.1 major CHO metabolism.degradation.sucrose.invertases.neutral	at5g22510	beta-fructofuranosidase, putative / invertase, putative / saccharase, putative / beta-fructosidase, putative
258507_at	1.6798	-0.748288	2.52663	-1.33721	2.2.1.3.1 major CHO metabolism.degradation.sucrose.invertases.neutral	at3g06500	beta-fructofuranosidase, putative / invertase, putative / saccharase, putative / beta-fructosidase, putative
245998_at	1.4174	-0.503245	1.6769	-0.745793	2.2.1.5 major CHO metabolism.degradation.sucrose.Susy	at5g20830	SUS1 (SUCROSE SYNTHASE 1); UDP-glycosyltransferase/ sucrose synthase
245275_at	18.1989	-4.18578	157.86	-7.3025	2.2.2.1.2 major CHO metabolism.degradation.starch.starch cleavage.beta amylase	at4g15210	BAM5 (BETA-AMYLASE 5); beta-amylase
266357_at	2.79812	-1.48446	5.52029	-2.46474	2.2.2.1.2 major CHO metabolism.degradation.starch.starch cleavage.beta amylase	at2g32290	BAM6 (BETA-AMYLASE 6); beta-amylase/ catalytic/ cation binding
256676_at	1.58842	-0.667595	6.62992	-2.72899	2.2.2.10 major CHO metabolism.degradation.starch.laforin like phosphoglucan phosphatase (SEX4)	at3g52180	SEX4 (STARCH-EXCESS 4); polysaccharide binding / protein tyrosine/serine/threonine phosphatase
254153_at	1.6516	-0.723867	12.223	-3.61152	2.2.2.3 major CHO metabolism.degradation.starch.glucan water dikinase	at4g24450	PWD (PHOSPHOGLUCAN, WATER DIKINASE); ATP binding / kinase
245094_at	1.62783	-0.702952	3.44467	-1.78437	2.2.2.4 major CHO metabolism.degradation.starch.D enzyme	at2g40840	DPE2 (DISPROPORTIONATING ENZYME 2); 4-alpha-glucanotransferase/ heteroglycan binding
263875_at	1.59758	-0.675887	2.40283	-1.26473	20 stress	at2g21970	SEP2 (STRESS ENHANCED PROTEIN 2); chlorophyll binding
254247_at	1.82045	-0.864292	2.41088	-1.26956	20 stress AND 30.2.17 signalling.receptor kinases.DUF 26	at4g23260	ATP binding / protein kinase/ protein serine/threonine kinase/ protein tyrosine kinase
245566_at	1.62003	-0.696024	1.36711	-0.451126	20.1 stress.biotic	at4g14610	0
249439_at	1.56607	-0.647151	1.90629	-0.93077	20.1 stress.biotic	at5g40020	pathogenesis-related thaumatin family protein
249441_at	2.10289	-1.07237	2.58418	-1.36971	20.1 stress.biotic	at5g39730	avirulence-responsive protein-related / avirulence induced gene (AIG) protein-related
250829_at	1.46942	-0.555243	1.86791	-0.901422	20.1 stress.biotic	at5g04720	ADR1-L2 (ADR1-like 2); ATP binding / nucleoside-triphosphatase/ nucleotide binding / protein binding
252421_at	2.11395	-1.07994	2.23942	-1.16312	20.1 stress.biotic	at3g47540	chitinase, putative
253104_at	1.45806	-0.544048	3.23366	-1.69317	20.1 stress.biotic	at4g36010	pathogenesis-related thaumatin family protein
253377_at	1.73676	-0.796397	1.89287	-0.920572	20.1 stress.biotic	at4g33300	ADR1-L1 (ADR1-like 1); ATP binding / protein binding
255980_at	2.44196	-1.28804	5.19148	-2.37615	20.1 stress.biotic	at1g33970	avirulence-responsive protein, putative / avirulence induced gene protein, putative / AIG protein, putative
258000_at	1.55894	-0.640562	2.51109	-1.32831	20.1 stress.biotic	at3g28940	avirulence-responsive protein, putative / avirulence induced gene (AIG) protein, putative
258001_at	1.7493	-0.806777	2.74358	-1.45606	20.1 stress.biotic	at3g28950	avirulence-responsive protein-related / avirulence induced gene (AIG) protein-related
258791_at	2.95163	-1.56151	2.16819	-1.11649	20.1 stress.biotic	at3g04720	PR4 (PATHOGENESIS-RELATED 4); chitin binding
259102_at	1.7805	-0.832278	2.51236	-1.32905	20.1 stress.biotic	at3g11660	NHL1
260568_at	3.3432	-1.74123	4.0443	-2.01589	20.1 stress.biotic	at2g43570	chitinase, putative
266168_at	1.42325	-0.509194	1.6525	-0.724654	20.1 stress.biotic	at2g38870	protease inhibitor, putative
245218_s_at	1.45649	-0.542498	1.70918	-0.773306	20.1 stress.biotic AND 20.1.7 stress.biotic.PR-proteins	MULTIPLE HITS	ATARD1 (ACIREDUCTONE DIOXYGENASE 1); acireductone dioxygenase [iron(II)-requiring]/ metal
248719_at	1.55143	-0.633598	2.04424	-1.03156	20.1.1 stress.biotic.respiratory burst	at5g47910	RBOHD (RESPIRATORY BURST OXIDASE HOMOLOGUE D); NAD(P)H oxidase
262374_s_at	1.65804	-0.729478	1.69945	-0.765064	20.1.2 stress.biotic.receptors AND 20.1.7 stress.biotic.PR-proteins	MULTIPLE HITS	ATARD1 (ACIREDUCTONE DIOXYGENASE 1); acireductone dioxygenase [iron(II)-requiring]/ metal
250485_at	2.07371	-1.05221	4.59674	-2.20061	20.1.3 stress.biotic.signalling	at5g09990	PROPEP5 (Elicitor peptide 5 precursor)
252373_at	1.63255	-0.707129	1.49348	-0.578677	20.1.3 stress.biotic.signalling	at3g48090	EDS1 (enhanced disease susceptibility 1); lipase/ signal transducer/ triacylglycerol lipase
258207_at	1.9867	-0.990371	4.09902	-2.03528	20.1.5 stress.biotic.regulation of transcription	at3g14050	RSH2 (RELA-SPOT HOMOLOG 2); GTP diphosphokinase
263159_at	2.21792	-1.14921	5.0591	-2.33888	20.1.5 stress.biotic.regulation of transcription	at1g54130	RSH3 (RELA/SPOT HOMOLOG 3); GTP diphosphokinase
254852_at	1.46722	-0.553089	1.36784	-0.451902	20.1.5 stress.biotic.regulation of transcription AND 27.3.32 RNA.regulation of transcription.WRKY domain transcription factor family	at4g12020	WRKY19; transcription factor
245219_at	1.44391	-0.529981	1.5111	-0.595596	20.1.7 stress.biotic.PR-proteins	MULTIPLE HITS	ATARD1 (ACIREDUCTONE DIOXYGENASE 1); acireductone dioxygenase [iron(II)-requiring]/ metal
247848_at	1.38971	-0.474783	1.34407	-0.426611	20.1.7 stress.biotic.PR-proteins	at5g58120	disease resistance protein (TIR-NBS-LRR class), putative
252126_at	1.68836	-0.755625	1.58129	-0.661101	20.1.7 stress.biotic.PR-proteins	at3g50950	disease resistance protein (CC-NBS-LRR class), putative
253074_at	1.65836	-0.729754	1.38602	-0.47095	20.1.7 stress.biotic.PR-proteins	at4g36140	disease resistance protein (TIR-NBS-LRR class), putative
253075_at	1.55805	-0.63974	1.74695	-0.80484	20.1.7 stress.biotic.PR-proteins	at4g36150	disease resistance protein (TIR-NBS-LRR class), putative
256425_at	1.57477	-0.655137	2.20373	-1.13995	20.1.7 stress.biotic.PR-proteins	at1g33560	ADR1 (ACTIVATED DISEASE RESISTANCE 1); kinase
256431_s_at	2.75955	-1.46443	2.13417	-1.09367	20.1.7 stress.biotic.PR-proteins	MULTIPLE HITS	ATARD1 (ACIREDUCTONE DIOXYGENASE 1); acireductone dioxygenase [iron(II)-requiring]/ metal
260464_at	1.74817	-0.805848	1.95875	-0.969933	20.1.7 stress.biotic.PR-proteins	at1g10920	LOV1; ATP binding
260735_at	1.56822	-0.649131	1.71865	-0.781278	20.1.7 stress.biotic.PR-proteins	at1g17610	disease resistance protein-related
262366_at	1.96476	-0.974351	2.38118	-1.25168	20.1.7 stress.biotic.PR-proteins	at1g72890	disease resistance protein (TIR-NBS class), putative
260551_at	4.25027	-2.08755	14.6527	-3.8731	20.1.7.12 stress.biotic.PR-proteins.plant defensins	at2g43510	ATTI1; serine-type endopeptidase inhibitor
245736_at	2.40798	-1.26782	10.9794	-3.45673	20.1.7.6 stress.biotic.PR-proteins.proteinase inhibitors	at1g73330	ATDR4; peptidase inhibitor
247733_at	1.37563	-0.460091	1.57082	-0.651522	20.2.1 stress.abiotic.heat	at5g59610	DNAJ heat shock N-terminal domain-containing protein
248172_at	1.2793	-0.355359	1.58906	-0.668173	20.2.1 stress.abiotic.heat	at5g54660	heat shock protein-related
249850_at	1.78115	-0.832812	5.43006	-2.44097	20.2.1 stress.abiotic.heat	at5g23240	DNAJ heat shock N-terminal domain-containing protein
250017_at	1.30252	-0.3813	2.17433	-1.12057	20.2.1 stress.abiotic.heat	at5g18140	DNAJ heat shock N-terminal domain-containing protein
251089_at	1.30285	-0.381669	1.25985	-0.333253	20.2.1 stress.abiotic.heat	at5g01390	DNAJ heat shock protein, putative
253125_at	2.24589	-1.16729	8.31238	-3.05526	20.2.1 stress.abiotic.heat	at4g36040	DNAJ heat shock N-terminal domain-containing protein (J11)
254688_at	2.41796	-1.27379	4.06427	-2.023	20.2.1 stress.abiotic.heat	at4g13830	J20 (DNAJ-LIKE 20); heat shock protein binding
256221_at	1.88256	-0.912699	2.82018	-1.49579	20.2.1 stress.abiotic.heat	at1g56300	DNAJ heat shock N-terminal domain-containing protein
256245_at	1.87091	-0.903738	41.1933	-5.36434	20.2.1 stress.abiotic.heat	at3g12580	HSP70 (heat shock protein 70); ATP binding
261901_at	5.3612	-2.42256	7.47345	-2.90177	20.2.1 stress.abiotic.heat	at1g80920	J8; heat shock protein binding / unfolded protein binding
263384_at	1.50991	-0.59446	5.2887	-2.40291	20.2.1 stress.abiotic.heat	at2g40130	heat shock protein-related
263985_at	1.38919	-0.474243	2.43487	-1.28385	20.2.1 stress.abiotic.heat	at2g42750	DNAJ heat shock N-terminal domain-containing protein
264135_at	1.28029	-0.356474	1.28092	-0.357179	20.2.1 stress.abiotic.heat	at1g79030	DNAJ heat shock N-terminal domain-containing protein / S-locus protein, putative
265613_at	1.33879	-0.420934	1.40307	-0.488585	20.2.1 stress.abiotic.heat	at2g25560	DNAJ heat shock N-terminal domain-containing protein
265826_at	1.39839	-0.483762	2.0782	-1.05534	20.2.1 stress.abiotic.heat	at2g35795	DNAJ heat shock N-terminal domain-containing protein
257892_at	1.83017	-0.871978	3.4823	-1.80004	20.2.2 stress.abiotic.cold	at3g17020	universal stress protein (USP) family protein
246824_at	1.34556	-0.428211	1.41224	-0.497983	20.2.3 stress.abiotic.drought/salt	at5g26990	drought-responsive family protein
255504_at	1.3589	-0.44244	1.58287	-0.662542	20.2.3 stress.abiotic.drought/salt	at4g02200	drought-responsive family protein
256226_at	2.23735	-1.16179	3.54397	-1.82537	20.2.3 stress.abiotic.drought/salt	at1g56280	ATDI19
256294_at	2.69808	-1.43193	6.16193	-2.62338	20.2.3 stress.abiotic.drought/salt	at1g69450	LOCATED IN: endomembrane system, membrane; EXPRESSED IN: 23 plant structures; EXPRESSED DURING: 13 growth stages; CONTAINS InterPro DOMAIN/s: Pr
259318_at	1.37224	-0.456533	2.0654	-1.04642	20.2.3 stress.abiotic.drought/salt	at3g01100	HYP1 (HYPOTHETICAL PROTEIN 1)
262107_at	1.66693	-0.737198	2.01106	-1.00795	20.2.3 stress.abiotic.drought/salt	at1g02750	zinc ion binding
262609_at	1.5581	-0.63979	2.47333	-1.30646	20.2.3 stress.abiotic.drought/salt	at1g13930	Involved in response to salt stress. Knockout mutants are hypersensitive to salt stress.
266566_at	1.535	-0.618235	2.79526	-1.48298	20.2.3 stress.abiotic.drought/salt	at2g24040	hydrophobic protein, putative / low temperature and salt responsive protein, putative
253812_at	1.46215	-0.548087	1.58209	-0.661829	20.2.4 stress.abiotic.touch/wounding	at4g28240	wound-responsive protein-related
256433_at	1.378	-0.46258	2.89755	-1.53483	20.2.4 stress.abiotic.touch/wounding	at3g10985	SAG20 (SENESCENCE ASSOCIATED GENE 20)
261144_s_at	2.43897	-1.28627	4.02719	-2.00978	20.2.4 stress.abiotic.touch/wounding	MULTIPLE HITS	ATARD1 (ACIREDUCTONE DIOXYGENASE 1); acireductone dioxygenase [iron(II)-requiring]/ metal
262506_at	1.52089	-0.604911	1.94702	-0.961268	20.2.5 stress.abiotic.light	at1g21640	NADK2; NAD+ kinase/ calmodulin binding
247095_at	1.50763	-0.592286	4.50943	-2.17294	20.2.99 stress.abiotic.unspecified	at5g66400	RAB18 (RESPONSIVE TO ABA 18)
252102_at	1.30477	-0.383792	1.50647	-0.591172	20.2.99 stress.abiotic.unspecified	at3g50970	LTI30 (LOW TEMPERATURE-INDUCED 30)
254234_at	1.67035	-0.740153	4.30619	-2.10641	20.2.99 stress.abiotic.unspecified	at4g23680	major latex protein-related / MLP-related
259184_at	1.37471	-0.459128	1.70594	-0.770563	20.2.99 stress.abiotic.unspecified	at3g01520	universal stress protein (USP) family protein
260444_at	1.55547	-0.637352	2.54487	-1.34759	20.2.99 stress.abiotic.unspecified	at1g68300	universal stress protein (USP) family protein
262304_at	2.03687	-1.02635	3.05938	-1.61324	20.2.99 stress.abiotic.unspecified	at1g70890	MLP43 (MLP-LIKE PROTEIN 43)
264887_at	1.99734	-0.998078	1.90599	-0.930544	20.2.99 stress.abiotic.unspecified	at1g23120	major latex protein-related / MLP-related
264899_at	2.55311	-1.35225	5.27654	-2.39959	20.2.99 stress.abiotic.unspecified	at1g23130	Bet v I allergen family protein
266458_at	1.32486	-0.405836	2.67246	-1.41817	20.2.99 stress.abiotic.unspecified	at2g47710	universal stress protein (USP) family protein
249176_at	1.56807	-0.648987	1.96412	-0.973882	21.1 redox.thioredoxin	at5g42980	ATTRX3 (THIOREDOXIN 3); oxidoreductase, acting on sulfur group of donors, disulfide as acceptor
249385_at	1.59925	-0.677398	2.58168	-1.36831	21.1 redox.thioredoxin	at5g39950	ATTRX2 (THIOREDOXIN 2); oxidoreductase, acting on sulfur group of donors, disulfide as acceptor
250649_at	1.45102	-0.537066	0.574731	0.799041	21.1 redox.thioredoxin	at5g06690	WCRKC1 (WCRKC THIOREDOXIN 1)
258219_at	1.27983	-0.355947	2.10719	-1.07532	21.1 redox.thioredoxin	at3g17880	ATTDX (TETRATICOPEPTIDE DOMAIN-CONTAINING THIOREDOXIN); oxidoreductase, acting on sulfur group of donors, disulfid
260943_at	3.09559	-1.63021	6.90429	-2.78749	21.1 redox.thioredoxin	at1g45145	ATTRX5; oxidoreductase, acting on sulfur group of donors, disulfide as acceptor
261145_at	1.38683	-0.47179	1.44004	-0.526107	21.1 redox.thioredoxin	at1g19730	ATTRX4; oxidoreductase, acting on sulfur group of donors, disulfide as acceptor
261417_at	1.37713	-0.46167	1.30461	-0.383617	21.1 redox.thioredoxin	at1g07700	thioredoxin family protein
261751_at	1.33232	-0.413941	1.94373	-0.958826	21.1 redox.thioredoxin	at1g76080	CDSP32 (CHLOROPLASTIC DROUGHT-INDUCED STRESS PROTEIN OF 32 KD)
261821_at	1.53703	-0.620142	2.12573	-1.08796	21.1 redox.thioredoxin	at1g11530	ATCXXS1 (C-terminal cysteine residue is changed to a serine 1); protein disulfide isomerase
263624_at	1.19985	-0.26285	1.25306	-0.325455	21.1 redox.thioredoxin	at2g04700	ferredoxin thioredoxin reductase catalytic beta chain family protein
248682_at	1.61663	-0.692986	2.4882	-1.3151	21.2 redox.ascorbate and glutathione	at5g48810	CB5-D (CYTOCHROME B5 ISOFORM D); heme binding
252024_at	1.37088	-0.455099	1.74142	-0.80026	21.2 redox.ascorbate and glutathione	at3g52880	monodehydroascorbate reductase, putative
260545_at	1.36169	-0.4454	1.48496	-0.570427	21.2 redox.ascorbate and glutathione	at2g43350	ATGPX3 (GLUTATHIONE PEROXIDASE 3); glutathione peroxidase
262637_at	1.46249	-0.548427	2.59032	-1.37313	21.2 redox.ascorbate and glutathione	at1g06640	2-oxoglutarate-dependent dioxygenase, putative
264383_at	1.40144	-0.486913	0.765063	0.38635	21.2 redox.ascorbate and glutathione	at2g25080	ATGPX1 (GLUTATHIONE PEROXIDASE 1); glutathione peroxidase
250916_at	2.1111	-1.078	4.07901	-2.02822	21.2.1 redox.ascorbate and glutathione.ascorbate	at5g03630	ATMDAR2; monodehydroascorbate reductase (NADH)
261149_s_at	1.86825	-0.901685	5.32847	-2.41372	21.2.1 redox.ascorbate and glutathione.ascorbate	MULTIPLE HITS	ATARD1 (ACIREDUCTONE DIOXYGENASE 1); acireductone dioxygenase [iron(II)-requiring]/ metal
261412_at	1.43848	-0.524545	1.65871	-0.730065	21.2.1 redox.ascorbate and glutathione.ascorbate	at1g07890	APX1 (ascorbate peroxidase 1); L-ascorbate peroxidase
251205_at	1.40784	-0.493485	1.74733	-0.80515	21.2.2 redox.ascorbate and glutathione.glutathione	at3g63080	ATGPX5 (glutathione peroxidase 5); glutathione peroxidase
253496_at	3.16194	-1.66081	7.24051	-2.85609	21.2.2 redox.ascorbate and glutathione.glutathione	at4g31870	ATGPX7 (glutathione peroxidase 7); glutathione peroxidase
253708_at	1.80544	-0.85235	4.11082	-2.03943	21.2.2 redox.ascorbate and glutathione.glutathione	at4g29210	GGT4 (GAMMA-GLUTAMYL TRANSPEPTIDASE 4); gamma-glutamyltransferase/ glutathione gamma-glutamylcysteinyltransferase
254890_at	1.90631	-0.930783	3.75937	-1.91049	21.2.2 redox.ascorbate and glutathione.glutathione	at4g11600	ATGPX6 (GLUTATHIONE PEROXIDASE 6); glutathione peroxidase
253393_at	1.31812	-0.398485	1.89031	-0.91862	21.3 redox.heme	at4g32690	GLB3; oxygen transporter
246384_at	1.61367	-0.690349	3.69824	-1.88684	21.4 redox.glutaredoxins	at1g77370	glutaredoxin, putative
247418_at	1.45368	-0.539707	1.68735	-0.754759	21.4 redox.glutaredoxins	at5g63030	glutaredoxin, putative
249380_at	1.64915	-0.72172	2.34649	-1.2305	21.4 redox.glutaredoxins	at5g40370	glutaredoxin, putative
250260_at	1.47597	-0.561667	2.19782	-1.13607	21.4 redox.glutaredoxins	at5g13810	glutaredoxin family protein
250344_at	2.03236	-1.02316	17.0434	-4.09114	21.4 redox.glutaredoxins	at5g11930	glutaredoxin family protein
253382_at	2.12824	-1.08966	11.0554	-3.46668	21.4 redox.glutaredoxins	at4g33040	glutaredoxin family protein
261919_at	1.30188	-0.380602	2.15236	-1.10592	21.5 redox.peroxiredoxin	at1g65980	TPX1 (thioredoxin-dependent peroxidase 1); antioxidant/ oxidoreductase
259544_at	2.06533	-1.04637	3.98152	-1.99332	21.6 redox.dismutases and catalases	at1g20620	CAT3 (CATALASE 3); catalase
263703_at	1.75703	-0.813141	2.55975	-1.356	21.99 redox.misc	at1g31170	SRX (SULFIREDOXIN); DNA binding / oxidoreductase, acting on sulfur group of donors
248248_at	1.65706	-0.728625	3.92396	-1.97231	22.1.7 polyamine metabolism.synthesis.spermine synthase	at5g53120	SPDS3 (SPERMIDINE SYNTHASE 3); spermidine synthase/ spermine synthase
253606_at	1.68777	-0.755122	2.03974	-1.02839	23.1.99 nucleotide metabolism.synthesis.unspecified	at4g30530	defense-related protein, putative
253639_at	1.59916	-0.677315	2.57802	-1.36626	23.1.99 nucleotide metabolism.synthesis.unspecified	at4g30550	glutamine amidotransferase class-I domain-containing protein
247318_at	1.4702	-0.556015	1.99649	-0.997467	23.2 nucleotide metabolism.degradation	at5g63990	3'(2'),5'-bisphosphate nucleotidase, putative / inositol polyphosphate 1-phosphatase, putative
248155_at	1.57756	-0.657697	2.18868	-1.13006	23.2 nucleotide metabolism.degradation	at5g54390	AHL (ARABIDOPSIS HAL2-LIKE); 3'(2'),5'-bisphosphate nucleotidase/ inositol or phosphatidylinositol phosphatase
255310_at	1.38983	-0.474911	2.92438	-1.54813	23.2 nucleotide metabolism.degradation	at4g04955	ATALN (Arabidopsis allantoinase); allantoinase/ hydrolase
265943_at	1.52022	-0.60428	2.38398	-1.25337	23.2 nucleotide metabolism.degradation	at2g19570	CDA1 (CYTIDINE DEAMINASE 1); cytidine deaminase
258162_at	1.72339	-0.785245	3.53702	-1.82254	23.2.1.3 nucleotide metabolism.degradation.pyrimidine.dihydrouracil dehydrogenase	at3g17810	dihydrouracil dehydrogenase chr3:6094098-6096566 FORWARD
250318_at	1.76535	-0.819958	2.51941	-1.33309	23.2.1.4 nucleotide metabolism.degradation.pyrimidine.dihydropyrimidinase	at5g12200	dihydropyrimidinase / DHPase / dihydropyrimidine amidohydrolase / hydantoinase (PYD2)
247275_at	2.15643	-1.10865	3.20305	-1.67945	23.2.1.5 nucleotide metabolism.degradation.pyrimidine.beta-ureidopropionase	at5g64370	BETA-UP (beta-ureidopropionase); beta-ureidopropionase
261013_at	1.51307	-0.597476	2.28939	-1.19496	23.3 nucleotide metabolism.salvage	at1g26440	ATUPS5 (ARABIDOPSIS THALIANA UREIDE PERMEASE 5); allantoin uptake transmembrane transporter/ uracil transmembrane transporter/
248793_at	2.04815	-1.03432	6.86625	-2.77952	23.3.3 nucleotide metabolism.salvage.NUDIX hydrolases	at5g47240	atnudt8 (Arabidopsis thaliana Nudix hydrolase homolog 8); hydrolase
262746_at	1.37366	-0.458024	2.31732	-1.21246	23.3.3 nucleotide metabolism.salvage.NUDIX hydrolases	at1g28960	ATNUDX15 (ARABIDOPSIS THALIANA NUDIX HYDROLASE HOMOLOG 15); hydrolase
251426_at	1.66542	-0.735884	3.93082	-1.97483	23.4.3 nucleotide metabolism.phosphotransfer and pyrophosphatases.uridylate kinase	at3g60180	uridylate kinase, putative / uridine monophosphate kinase, putative / UMP kinase, putative
253697_at	1.39989	-0.485316	1.73105	-0.791645	23.4.99 nucleotide metabolism.phosphotransfer and pyrophosphatases.misc	at4g29700	type I phosphodiesterase/nucleotide pyrophosphatase family protein
255587_at	2.24018	-1.16362	6.23937	-2.6414	23.4.99 nucleotide metabolism.phosphotransfer and pyrophosphatases.misc	at4g01480	AtPPa5 (Arabidopsis thaliana pyrophosphorylase 5); inorganic diphosphatase/ pyrophosphatase
260986_at	1.32983	-0.411245	2.75234	-1.46066	24.1 Biodegradation of Xenobiotics.hydroxyacylglutathione hydrolase	at1g53580	GLY3 (GLYOXALASE II 3); hydrolase/ hydroxyacylglutathione hydrolase
247931_at	1.58714	-0.666426	2.81765	-1.49449	24.2 Biodegradation of Xenobiotics.lactoylglutathione lyase	at5g57040	lactoylglutathione lyase family protein / glyoxalase I family protein
264372_at	1.57418	-0.6546	2.92827	-1.55005	24.2 Biodegradation of Xenobiotics.lactoylglutathione lyase	at1g11840	ATGLX1 (GLYOXALASE I HOMOLOG); lactoylglutathione lyase/ metal ion binding
257052_at	1.2892	-0.366479	1.54139	-0.62423	24.3 Biodegradation of Xenobiotics.3-hydroxybutyryl-CoA dehydrogenase	at3g15290	3-hydroxybutyryl-CoA dehydrogenase, putative
250129_at	2.43677	-1.28497	4.47024	-2.16035	25 C1-metabolism	at5g16450	dimethylmenaquinone methyltransferase family protein
258614_at	1.67257	-0.742066	2.04817	-1.03433	25 C1-metabolism	at3g02770	dimethylmenaquinone methyltransferase family protein
246595_at	1.96036	-0.971119	3.1681	-1.66362	25.10 C1-metabolism.formate dehydrogenase	at5g14780	FDH (FORMATE DEHYDROGENASE); NAD or NADH binding / binding / catalytic/ cofactor binding / oxidoreductase, acting on the CH-OH gr
261864_s_at	1.34295	-0.425402	1.27445	-0.349877	25.2 C1-metabolism.formate-tetrahydrofolate ligase	MULTIPLE HITS	ATARD1 (ACIREDUCTONE DIOXYGENASE 1); acireductone dioxygenase [iron(II)-requiring]/ metal
247283_at	1.33005	-0.41148	2.64735	-1.40455	26.1 misc.misc2	at5g64250	2-nitropropane dioxygenase family / NPD family
252095_at	1.54152	-0.62435	2.99079	-1.58053	26.1 misc.misc2	at3g51000	epoxide hydrolase, putative
254393_at	1.49042	-0.575719	3.6815	-1.88029	26.1 misc.misc2	at4g21580	oxidoreductase, zinc-binding dehydrogenase family protein
258102_at	1.40307	-0.488585	2.54164	-1.34576	26.1 misc.misc2	at3g23600	dienelactone hydrolase family protein
258108_at	1.5965	-0.674917	1.95087	-0.964116	26.1 misc.misc2	at3g23570	dienelactone hydrolase family protein
267059_at	1.27336	-0.348637	1.61581	-0.69226	26.1 misc.misc2	at2g32520	dienelactone hydrolase family protein
267607_s_at	1.68459	-0.752393	3.02946	-1.59906	26.1 misc.misc2	MULTIPLE HITS	ATARD1 (ACIREDUCTONE DIOXYGENASE 1); acireductone dioxygenase [iron(II)-requiring]/ metal
246620_at	1.84124	-0.88068	3.36135	-1.74904	26.10 misc.cytochrome P450	at5g36220	CYP81D1 (CYTOCHROME P450 81D1); electron carrier/ heme binding / iron ion binding / monooxygenase/ oxygen binding
246947_at	1.41197	-0.497709	2.10819	-1.076	26.10 misc.cytochrome P450	at5g25120	CYP71B11; electron carrier/ heme binding / iron ion binding / monooxygenase/ oxygen binding
246949_at	2.33787	-1.2252	3.29325	-1.71951	26.10 misc.cytochrome P450	at5g25140	CYP71B13; electron carrier/ heme binding / iron ion binding / monooxygenase/ oxygen binding
250423_s_at	1.62037	-0.696319	2.36673	-1.24289	26.10 misc.cytochrome P450	MULTIPLE HITS	ATARD1 (ACIREDUCTONE DIOXYGENASE 1); acireductone dioxygenase [iron(II)-requiring]/ metal
251301_at	1.67538	-0.744487	2.26589	-1.18007	26.10 misc.cytochrome P450	at3g61880	CYP78A9 (CYTOCHROME P450 78A9); monooxygenase/ oxygen binding
252629_at	2.59176	-1.37393	4.52824	-2.17895	26.10 misc.cytochrome P450	at3g44970	cytochrome P450 family protein
253052_at	1.26302	-0.336877	1.9885	-0.991679	26.10 misc.cytochrome P450	at4g37310	CYP81H1; electron carrier/ heme binding / iron ion binding / monooxygenase/ oxygen binding
256386_at	2.00146	-1.00105	4.22718	-2.0797	26.10 misc.cytochrome P450	at1g66540	cytochrome P450, putative
256873_at	1.31438	-0.39438	1.87899	-0.909955	26.10 misc.cytochrome P450	at3g26310	CYP71B35; electron carrier/ heme binding / iron ion binding / monooxygenase/ oxygen binding
257129_at	1.85816	-0.893875	4.34783	-2.1203	26.10 misc.cytochrome P450	at3g20100	CYP705A19; electron carrier/ heme binding / iron ion binding / monooxygenase/ oxygen binding
257624_at	2.97794	-1.57432	3.05331	-1.61038	26.10 misc.cytochrome P450	at3g26220	CYP71B3; electron carrier/ heme binding / iron ion binding / monooxygenase/ oxygen binding
257625_at	2.82521	-1.49836	1.99605	-0.997151	26.10 misc.cytochrome P450	at3g26230	CYP71B24; electron carrier/ heme binding / iron ion binding / monooxygenase/ oxygen binding
257628_at	2.76204	-1.46573	6.75998	-2.75702	26.10 misc.cytochrome P450	at3g26290	CYP71B26; electron carrier/ heme binding / iron ion binding / monooxygenase/ oxygen binding
257634_s_at	2.3226	-1.21574	2.82157	-1.4965	26.10 misc.cytochrome P450	MULTIPLE HITS	ATARD1 (ACIREDUCTONE DIOXYGENASE 1); acireductone dioxygenase [iron(II)-requiring]/ metal
257635_at	3.63442	-1.86173	8.48559	-3.08502	26.10 misc.cytochrome P450	at3g26280	CYP71B4; electron carrier/ heme binding / iron ion binding / monooxygenase/ oxygen binding
258063_at	2.14939	-1.10393	4.14033	-2.04974	26.10 misc.cytochrome P450	at3g14620	CYP72A8; electron carrier/ heme binding / iron ion binding / monooxygenase/ oxygen binding
259058_at	4.44352	-2.1517	17.7177	-4.14712	26.10 misc.cytochrome P450	at3g03470	CYP89A9; electron carrier/ heme binding / iron ion binding / monooxygenase/ oxygen binding
262780_at	1.88243	-0.912593	2.36731	-1.24325	26.10 misc.cytochrome P450	at1g13090	CYP71B28; electron carrier/ heme binding / iron ion binding / monooxygenase/ oxygen binding
262882_at	1.60625	-0.683695	2.76751	-1.46859	26.10 misc.cytochrome P450	at1g64900	CYP89A2 (CYTOCHROME P450 89A2); electron carrier/ heme binding / iron ion binding / monooxygenase/ oxygen binding
266778_at	2.70485	-1.43555	4.61933	-2.20768	26.10 misc.cytochrome P450	at2g29090	CYP707A2; (+)-abscisic acid 8'-hydroxylase/ oxygen binding
267500_s_at	2.14551	-1.10132	4.60725	-2.20391	26.10 misc.cytochrome P450	MULTIPLE HITS	ATARD1 (ACIREDUCTONE DIOXYGENASE 1); acireductone dioxygenase [iron(II)-requiring]/ metal
249242_at	2.08984	-1.06339	4.14933	-2.05288	26.11 misc.alcohol dehydrogenases	at5g42250	alcohol dehydrogenase, putative
246042_at	1.5133	-0.597694	2.47683	-1.3085	26.11.1 misc.alcohol dehydrogenases.cinnamyl alcohol dehydrogenase	at5g19440	cinnamyl-alcohol dehydrogenase, putative (CAD)
264514_at	1.53833	-0.621363	11.1674	-3.48122	26.11.1 misc.alcohol dehydrogenases.cinnamyl alcohol dehydrogenase	at1g09500	cinnamyl-alcohol dehydrogenase family / CAD family
247812_at	1.71049	-0.774414	2.12748	-1.08914	26.12 misc.peroxidases	at5g58390	peroxidase, putative
254386_at	1.33804	-0.42012	1.89749	-0.924091	26.12 misc.peroxidases	at4g21960	PRXR1; electron carrier/ heme binding / peroxidase
245330_at	1.34561	-0.428256	1.54689	-0.629368	26.13 misc.acid and other phosphatases	at4g14930	acid phosphatase survival protein SurE, putative
250298_at	1.29566	-0.373687	2.18821	-1.12975	26.13 misc.acid and other phosphatases	at5g11860	NLI interacting factor (NIF) family protein
256100_at	1.75727	-0.813333	1.72461	-0.786272	26.13 misc.acid and other phosphatases	at1g13750	calcineurin-like phosphoesterase family protein
261413_at	1.57934	-0.659319	1.82786	-0.870154	26.13 misc.acid and other phosphatases	at1g07630	PLL5; catalytic/ protein serine/threonine phosphatase
267361_at	4.34593	-2.11967	2.95189	-1.56164	26.13 misc.acid and other phosphatases	at2g39920	acid phosphatase class B family protein
260060_at	1.6601	-0.731274	2.90522	-1.53865	26.14 misc.oxygenases	at1g73680	pathogen-responsive alpha-dioxygenase, putative
254551_at	1.59162	-0.670492	2.93093	-1.55136	26.16 misc.myrosinases-lectin-jacalin	at4g19840	ATPP2-A1; carbohydrate binding
262357_at	1.79309	-0.842447	28.0951	-4.81225	26.16 misc.myrosinases-lectin-jacalin	at1g73040	jacalin lectin family protein
266989_at	2.82898	-1.50028	8.5645	-3.09837	26.16 misc.myrosinases-lectin-jacalin	at2g39330	JAL23 (JACALIN-RELATED LECTIN 23)
245352_at	3.57003	-1.83594	15.664	-3.96938	26.2 misc.UDP glucosyl and glucoronyl transferases	at4g15490	UGT84A3; UDP-glycosyltransferase/ sinapate 1-glucosyltransferase/ transferase, transferring glycosyl groups
245442_at	1.79475	-0.84378	2.19194	-1.13221	26.2 misc.UDP glucosyl and glucoronyl transferases	at4g16710	glycosyltransferase family protein 28
250264_at	1.53184	-0.615268	2.76778	-1.46873	26.2 misc.UDP glucosyl and glucoronyl transferases	at5g12890	UDP-glucoronosyl/UDP-glucosyl transferase family protein
250381_at	1.49587	-0.580982	2.61679	-1.3878	26.2 misc.UDP glucosyl and glucoronyl transferases	at5g11610	exostosin family protein
251764_at	1.4781	-0.563747	1.78083	-0.832551	26.2 misc.UDP glucosyl and glucoronyl transferases	at3g55830	EPC1 (ECTOPICALLY PARTING CELLS); UDP-glucosyltransferase/ transferase, transferring glycosyl groups
253866_at	1.46028	-0.546245	1.80071	-0.848564	26.2 misc.UDP glucosyl and glucoronyl transferases	at4g27480	glycosyltransferase family 14 protein / core-2/I-branching enzyme family protein
254320_at	1.66985	-0.739718	1.70368	-0.768651	26.2 misc.UDP glucosyl and glucoronyl transferases	at4g22580	exostosin family protein
257940_at	1.60261	-0.680425	3.92149	-1.9714	26.2 misc.UDP glucosyl and glucoronyl transferases	at3g21790	UDP-glucoronosyl/UDP-glucosyl transferase family protein
257949_at	1.34104	-0.423351	2.84674	-1.50931	26.2 misc.UDP glucosyl and glucoronyl transferases	at3g21750	UGT71B1 (UDP-GLUCOSYL TRANSFERASE 71B1); UDP-glycosyltransferase/ quercetin 3-O-glucosyltransferase/ transferase, transferrin
260799_at	1.79822	-0.846569	1.93982	-0.955924	26.2 misc.UDP glucosyl and glucoronyl transferases	at1g78270	AtUGT85A4 (UDP-glucosyl transferase 85A4); UDP-glycosyltransferase/ glucuronosyltransferase/ transferase, transferring hexo
262155_at	1.29389	-0.37171	1.42163	-0.507549	26.2 misc.UDP glucosyl and glucoronyl transferases	at1g52420	glycosyl transferase family 1 protein
262223_at	1.53725	-0.620355	2.10488	-1.07374	26.2 misc.UDP glucosyl and glucoronyl transferases	at1g74680	exostosin family protein
263847_at	1.45942	-0.545398	3.0681	-1.61734	26.2 misc.UDP glucosyl and glucoronyl transferases	at2g36970	UDP-glucoronosyl/UDP-glucosyl transferase family protein
247178_at	1.50051	-0.585457	1.53928	-0.622255	26.22 misc.short chain dehydrogenase/reductase (SDR)	at5g65205	short-chain dehydrogenase/reductase (SDR) family protein
248484_at	1.50862	-0.593226	2.14744	-1.10262	26.22 misc.short chain dehydrogenase/reductase (SDR)	at5g51030	short-chain dehydrogenase/reductase (SDR) family protein
251309_at	1.5142	-0.598555	1.78485	-0.835804	26.22 misc.short chain dehydrogenase/reductase (SDR)	at3g61220	short-chain dehydrogenase/reductase (SDR) family protein
251780_s_at	1.7441	-0.802483	4.01306	-2.0047	26.22 misc.short chain dehydrogenase/reductase (SDR)	MULTIPLE HITS	ATARD1 (ACIREDUCTONE DIOXYGENASE 1); acireductone dioxygenase [iron(II)-requiring]/ metal
254759_at	1.52832	-0.611943	3.07046	-1.61846	26.22 misc.short chain dehydrogenase/reductase (SDR)	at4g13180	short-chain dehydrogenase/reductase (SDR) family protein
254764_at	1.32709	-0.408262	2.45377	-1.295	26.22 misc.short chain dehydrogenase/reductase (SDR)	at4g13250	short-chain dehydrogenase/reductase (SDR) family protein
254928_at	1.40537	-0.490947	1.82854	-0.870691	26.22 misc.short chain dehydrogenase/reductase (SDR)	at4g11410	short-chain dehydrogenase/reductase (SDR) family protein
261537_at	1.51638	-0.600635	2.3831	-1.25284	26.22 misc.short chain dehydrogenase/reductase (SDR)	at1g01800	short-chain dehydrogenase/reductase (SDR) family protein
266015_at	1.65176	-0.724008	2.76467	-1.46711	26.22 misc.short chain dehydrogenase/reductase (SDR)	at2g24190	short-chain dehydrogenase/reductase (SDR) family protein
266761_at	2.6194	-1.38924	4.46149	-2.15753	26.22 misc.short chain dehydrogenase/reductase (SDR)	at2g47130	short-chain dehydrogenase/reductase (SDR) family protein
267169_at	1.36095	-0.444618	1.70642	-0.770973	26.22 misc.short chain dehydrogenase/reductase (SDR)	at2g37540	short-chain dehydrogenase/reductase (SDR) family protein
250923_at	1.61532	-0.691818	3.26232	-1.7059	26.23 misc.rhodanese	at5g03455	CDC25; arsenate reductase/ protein tyrosine phosphatase
253823_at	1.27673	-0.352454	1.3766	-0.461114	26.24 misc.GCN5-related N-acetyltransferase	at4g28030	GCN5-related N-acetyltransferase (GNAT) family protein
255718_at	1.3842	-0.469051	1.91036	-0.933846	26.24 misc.GCN5-related N-acetyltransferase	at1g32070	ATNSI (NUCLEAR SHUTTLE INTERACTING); N-acetyltransferase
256336_at	1.55276	-0.634833	1.82543	-0.868235	26.24 misc.GCN5-related N-acetyltransferase	at1g72030	GCN5-related N-acetyltransferase (GNAT) family protein
266188_at	1.80375	-0.850997	2.99703	-1.58354	26.24 misc.GCN5-related N-acetyltransferase	at2g39000	GCN5-related N-acetyltransferase (GNAT) family protein
267145_at	1.45361	-0.539643	1.71912	-0.781669	26.24 misc.GCN5-related N-acetyltransferase	at2g38130	ATMAK3; N-acetyltransferase
248118_at	1.50475	-0.589525	2.15086	-1.10491	26.28 misc.GDSL-motif lipase	at5g55050	GDSL-motif lipase/hydrolase family protein
256489_at	2.0652	-1.04628	2.19168	-1.13204	26.28 misc.GDSL-motif lipase	at1g31550	GDSL-motif lipase, putative
267096_at	1.82017	-0.864077	1.54972	-0.632003	26.28 misc.GDSL-motif lipase	at2g38180	GDSL-motif lipase/hydrolase family protein
253841_at	1.65917	-0.730462	5.32473	-2.41271	26.3 misc.gluco-, galacto- and mannosidases	at4g27830	BGLU10 (BETA GLUCOSIDASE 10); catalytic/ cation binding / hydrolase, hydrolyzing O-glycosyl compounds
254371_at	1.50297	-0.587818	1.78121	-0.832857	26.3 misc.gluco-, galacto- and mannosidases	at4g21760	BGLU47 (Beta-glucosidase 47); catalytic/ cation binding / hydrolase, hydrolyzing O-glycosyl compounds
262118_at	1.88042	-0.911052	10.5125	-3.39404	26.3 misc.gluco-, galacto- and mannosidases	at1g02850	BGLU11 (BETA GLUCOSIDASE 11); catalytic/ cation binding / hydrolase, hydrolyzing O-glycosyl compounds
247356_at	1.65781	-0.729275	1.75975	-0.815373	26.3.2 misc.gluco-, galacto- and mannosidases.beta-galactosidase	at5g63800	MUM2 (MUCILAGE-MODIFIED 2); beta-galactosidase
254021_at	1.45112	-0.537166	2.05459	-1.03885	26.30 misc. other Ferredoxins and Rieske domain	at4g25650	ACD1-LIKE (ACD1-LIKE); 2 iron, 2 sulfur cluster binding / electron carrier/ oxidoreductase
251625_at	5.25925	-2.39486	6.60323	-2.72317	26.4.1 misc.beta 1,3 glucan hydrolases.glucan endo-1,3-beta-glucosidase	at3g57260	BGL2 (BETA-1,3-GLUCANASE 2); cellulase/ glucan 1,3-beta-glucosidase/ hydrolase, hydrolyzing O-glycosyl compounds
246985_at	1.2773	-0.353094	1.56469	-0.645878	26.7 misc.oxidases - copper, flavone etc	at5g67290	FAD-dependent oxidoreductase family protein
253321_at	1.4388	-0.524866	2.50715	-1.32605	26.7 misc.oxidases - copper, flavone etc	at4g33910	oxidoreductase, 2OG-Fe(II) oxygenase family protein
254833_s_at	3.77664	-1.9171	32.0013	-5.00006	26.7 misc.oxidases - copper, flavone etc	MULTIPLE HITS	ATARD1 (ACIREDUCTONE DIOXYGENASE 1); acireductone dioxygenase [iron(II)-requiring]/ metal
262667_at	1.99782	-0.99843	3.5522	-1.82871	26.7 misc.oxidases - copper, flavone etc	at1g62810	copper amine oxidase, putative
264592_at	1.71006	-0.774046	1.70503	-0.769801	26.7 misc.oxidases - copper, flavone etc	at2g17720	oxidoreductase, 2OG-Fe(II) oxygenase family protein
250483_at	1.34528	-0.427908	2.16311	-1.11311	26.8 misc.nitrilases, *nitrile lyases, berberine bridge enzymes, reticuline oxidases, troponine reductases	at5g10300	MES5 (METHYL ESTERASE 5); hydrolase
255983_at	1.32175	-0.402448	1.40276	-0.488267	26.8 misc.nitrilases, *nitrile lyases, berberine bridge enzymes, reticuline oxidases, troponine reductases	at1g33990	MES14 (METHYL ESTERASE 14); hydrolase
261084_at	1.57896	-0.658977	2.15541	-1.10796	26.8 misc.nitrilases, *nitrile lyases, berberine bridge enzymes, reticuline oxidases, troponine reductases	at1g07440	tropinone reductase, putative / tropine dehydrogenase, putative
261326_s_at	1.5137	-0.598081	1.68596	-0.753572	26.8 misc.nitrilases, *nitrile lyases, berberine bridge enzymes, reticuline oxidases, troponine reductases	MULTIPLE HITS	ATARD1 (ACIREDUCTONE DIOXYGENASE 1); acireductone dioxygenase [iron(II)-requiring]/ metal
266291_at	1.72013	-0.782519	1.68174	-0.749959	26.8 misc.nitrilases, *nitrile lyases, berberine bridge enzymes, reticuline oxidases, troponine reductases	at2g29320	tropinone reductase, putative / tropine dehydrogenase, putative
266292_at	2.38486	-1.2539	10.2619	-3.35922	26.8 misc.nitrilases, *nitrile lyases, berberine bridge enzymes, reticuline oxidases, troponine reductases	at2g29350	SAG13; alcohol dehydrogenase/ oxidoreductase
250083_at	2.54483	-1.34757	48.4085	-5.59719	26.9 misc.glutathione S transferases	at5g17220	ATGSTF12 (ARABIDOPSIS THALIANA GLUTATHIONE S-TRANSFERASE PHI 12); glutathione transferase
250967_at	1.4102	-0.495899	2.01709	-1.01227	26.9 misc.glutathione S transferases	at5g02790	In2-1 protein, putative
262916_at	1.60301	-0.680783	3.23283	-1.6928	26.9 misc.glutathione S transferases	at1g59700	ATGSTU16 (GLUTATHIONE S-TRANSFERASE TAU 16); glutathione transferase
262932_at	1.37315	-0.457494	2.71473	-1.44081	26.9 misc.glutathione S transferases	at1g65820	microsomal glutathione s-transferase, putative
266181_at	1.82437	-0.867397	4.7878	-2.25936	26.9 misc.glutathione S transferases	at2g02390	ATGSTZ1 (ARABIDOPSIS THALIANA GLUTATHIONE S-TRANSFERASE ZETA 1); catalytic/ glutathione transferase
267154_at	1.40412	-0.489669	1.42279	-0.50872	26.9 misc.glutathione S transferases	at2g30870	GSTF10 (HALIANA GLUTATHIONE S-TRANSFERASE PHI 10); copper ion binding / glutathione binding / glutat
264633_at	1.32966	-0.41106	1.94288	-0.958197	27.1.1 RNA.processing.splicing	at1g65660	SMP1 (SWELLMAP 1); nucleic acid binding / single-stranded RNA binding
265027_at	1.35958	-0.443161	1.88089	-0.911412	27.1.19 RNA.processing.ribonucleases	at1g24450	NFD2 (NUCLEAR FUSION DEFECTIVE 2); RNA binding / ribonuclease III
258863_at	1.42241	-0.508341	1.6768	-0.745707	27.1.20 RNA.processing.degradation dicer	at3g03300	DCL2 (DICER-LIKE 2); ATP binding / ATP-dependent helicase/ RNA binding / double-stranded RNA binding / helicase/ nucleic
250404_at	1.27449	-0.349916	1.72307	-0.784977	27.2 RNA.transcription	at5g10960	CCR4-NOT transcription complex protein, putative
251662_at	1.3586	-0.442119	1.25934	-0.332671	27.2 RNA.transcription	at3g57080	NRPE5; DNA binding / DNA-directed RNA polymerase
252261_at	1.37338	-0.457726	1.59867	-0.676868	27.2 RNA.transcription	at3g49500	RDR6 (RNA-DEPENDENT RNA POLYMERASE 6); RNA-directed RNA polymerase/ nucleic acid binding
261100_at	1.50156	-0.586461	1.52876	-0.612365	27.2 RNA.transcription	at1g63020	NRPD1A (NUCLEAR RNA POLYMERASE D 1A); DNA binding / DNA-directed RNA polymerase
262888_at	2.03755	-1.02684	3.48991	-1.80319	27.2 RNA.transcription	at1g14790	RDR1 (RNA-DEPENDENT RNA POLYMERASE 1); RNA-directed RNA polymerase/ nucleic acid binding
262950_at	1.30752	-0.386831	1.65837	-0.729769	27.2 RNA.transcription	at1g75510	transcription initiation factor IIF beta subunit (TFIIF-beta) family protein
250454_at	1.68876	-0.755964	1.64203	-0.715482	27.3 RNA.regulation of transcription	at5g09830	BolA-like family protein
250119_at	1.2764	-0.352083	1.34946	-0.432384	27.3.11 RNA.regulation of transcription.C2H2 zinc finger family	at5g16470	zinc finger (C2H2 type) family protein
251586_at	1.8166	-0.861244	3.60888	-1.85155	27.3.11 RNA.regulation of transcription.C2H2 zinc finger family	at3g58070	GIS (GLABROUS INFLORESCENCE STEMS); nucleic acid binding / transcription factor/ zinc ion binding
257022_at	1.76414	-0.818964	2.38541	-1.25424	27.3.11 RNA.regulation of transcription.C2H2 zinc finger family	at3g19580	AZF2 (ARABIDOPSIS ZINC-FINGER PROTEIN 2); DNA binding / nucleic acid binding / transcription factor/ transcription repressor/ zi
257610_at	1.4297	-0.515712	1.67285	-0.742305	27.3.11 RNA.regulation of transcription.C2H2 zinc finger family	at3g13810	AtIDD11 (Arabidopsis thaliana Indeterminate(ID)-Domain 11); nucleic acid binding / transcription factor/ zinc ion binding
259932_at	1.33572	-0.417622	1.28059	-0.356814	27.3.11 RNA.regulation of transcription.C2H2 zinc finger family	at1g34370	STOP1 (sensitive to proton rhizotoxicity 1); nucleic acid binding / transcription factor/ zinc ion binding
261125_at	1.47038	-0.556189	2.00986	-1.0071	27.3.11 RNA.regulation of transcription.C2H2 zinc finger family	at1g04990	zinc finger (CCCH-type) family protein
262291_at	1.73028	-0.791006	2.18602	-1.12831	27.3.11 RNA.regulation of transcription.C2H2 zinc finger family	at1g70790	C2 domain-containing protein
253722_at	1.84094	-0.880441	3.12925	-1.64582	27.3.12 RNA.regulation of transcription.C3H zinc finger family	at4g29190	zinc finger (CCCH-type) family protein
250688_at	1.37814	-0.462721	3.8155	-1.93187	27.3.14 RNA.regulation of transcription.CCAAT box binding factor family, HAP2	at5g06510	NF-YA10 (NUCLEAR FACTOR Y, SUBUNIT A10); transcription factor
261803_at	1.78709	-0.837616	7.07577	-2.82289	27.3.14 RNA.regulation of transcription.CCAAT box binding factor family, HAP2	at1g30500	NF-YA7 (NUCLEAR FACTOR Y, SUBUNIT A7); specific transcriptional repressor/ transcription factor
245302_at	1.65177	-0.724016	4.6173	-2.20705	27.3.20 RNA.regulation of transcription.G2-like transcription factor family, GARP	at4g17695	KAN3 (KANADI 3); DNA binding / transcription factor
246215_at	1.34211	-0.4245	1.6269	-0.702128	27.3.20 RNA.regulation of transcription.G2-like transcription factor family, GARP	at4g37180	myb family transcription factor
262203_at	1.24478	-0.315894	1.57664	-0.656853	27.3.20 RNA.regulation of transcription.G2-like transcription factor family, GARP	at2g01060	myb family transcription factor
267077_at	1.3421	-0.424489	2.12053	-1.08443	27.3.20 RNA.regulation of transcription.G2-like transcription factor family, GARP	at2g40970	myb family transcription factor
246724_at	1.42365	-0.5096	1.71056	-0.774473	27.3.20 RNA.regulation of transcription.G2-like transcription factor family, GARP AND 27.3.25 RNA.regulation of transcription.MYB domain transcription factor family	at5g29000	myb family transcription factor
258807_at	1.70956	-0.773627	3.64423	-1.86562	27.3.20 RNA.regulation of transcription.G2-like transcription factor family, GARP AND 27.3.25 RNA.regulation of transcription.MYB domain transcription factor family	at3g04030	myb family transcription factor
245276_at	1.53426	-0.617543	2.03665	-1.0262	27.3.22 RNA.regulation of transcription.HB,Homeobox transcription factor family	at4g16780	ATHB-2 (ARABIDOPSIS THALIANA HOMEOBOX PROTEIN 2); DNA binding / protein homodimerization/ sequence-specific DNA b
249309_at	1.50936	-0.593936	2.14534	-1.10121	27.3.22 RNA.regulation of transcription.HB,Homeobox transcription factor family	at5g41410	BEL1 (BELL 1); DNA binding / protein binding / transcription factor
261120_at	1.66406	-0.73471	1.66348	-0.734202	27.3.22 RNA.regulation of transcription.HB,Homeobox transcription factor family	at1g75410	BLH3 (BEL1-LIKE HOMEODOMAIN 3); DNA binding / transcription factor
263956_at	1.63822	-0.712128	2.9073	-1.53968	27.3.22 RNA.regulation of transcription.HB,Homeobox transcription factor family	at2g35940	BLH1 (BEL1-LIKE HOMEODOMAIN 1); DNA binding / protein heterodimerization/ protein homodimerization/ transcription factor
264006_at	1.56408	-0.645319	2.71733	-1.44219	27.3.22 RNA.regulation of transcription.HB,Homeobox transcription factor family	at2g22430	ATHB6; DNA binding / protein binding / sequence-specific DNA binding / transcription activator/ transcription factor
259992_at	1.97362	-0.980847	2.65451	-1.40844	27.3.23 RNA.regulation of transcription.HSF,Heat-shock transcription factor family	at1g67970	AT-HSFA8; DNA binding / transcription factor
264872_at	2.58908	-1.37244	2.68835	-1.42672	27.3.24 RNA.regulation of transcription.MADS box transcription factor family	at1g24260	SEP3 (SEPALLATA3); DNA binding / protein binding / transcription factor
267509_at	1.9618	-0.972176	2.30353	-1.20385	27.3.24 RNA.regulation of transcription.MADS box transcription factor family	at2g45660	AGL20 (AGAMOUS-LIKE 20); transcription factor
246531_at	2.66358	-1.41336	11.3698	-3.50714	27.3.24 RNA.regulation of transcription.MADS box transcription factor family AND 33.99 development.unspecified	at5g15800	SEP1 (SEPALLATA1); DNA binding / transcription factor
247696_at	2.30663	-1.20579	4.45716	-2.15612	27.3.25 RNA.regulation of transcription.MYB domain transcription factor family	at5g59780	MYB59 (MYB DOMAIN PROTEIN 59); DNA binding / transcription factor
255037_at	1.59555	-0.674058	1.6558	-0.727528	27.3.25 RNA.regulation of transcription.MYB domain transcription factor family	at4g09460	ATMYB6; DNA binding / transcription factor
248328_at	1.3182	-0.398573	1.58983	-0.66887	27.3.26 RNA.regulation of transcription.MYB-related transcription factor family	at5g52660	myb family transcription factor
250858_at	1.43935	-0.52542	4.00228	-2.00082	27.3.26 RNA.regulation of transcription.MYB-related transcription factor family	at5g04760	myb family transcription factor
259412_at	1.43303	-0.519072	1.70528	-0.770009	27.3.26 RNA.regulation of transcription.MYB-related transcription factor family AND 27.3.30 RNA.regulation of transcription.Trihelix, Triple-Helix transcription factor family	at1g13450	DNA binding protein GT-1
262096_at	1.78608	-0.836793	3.20801	-1.68168	27.3.27 RNA.regulation of transcription.NAC domain transcription factor family	at1g56010	NAC1; transcription factor
262028_at	1.3534	-0.436586	1.95715	-0.968753	27.3.29 RNA.regulation of transcription.TCP transcription factor family	at1g35560	TCP family transcription factor, putative
258434_at	2.66483	-1.41404	3.01099	-1.59024	27.3.3 RNA.regulation of transcription.AP2/EREBP, APETALA2/Ethylene-responsive element binding protein family	at3g16770	ATEBP (ETHYLENE-RESPONSIVE ELEMENT BINDING PROTEIN); DNA binding / protein binding / transcription activator/ tr
248008_at	1.65003	-0.72249	1.82165	-0.865249	27.3.32 RNA.regulation of transcription.WRKY domain transcription factor family	at5g56270	WRKY2; transcription factor
255596_at	1.7358	-0.795604	1.45715	-0.543148	27.3.32 RNA.regulation of transcription.WRKY domain transcription factor family	at4g01720	WRKY47; transcription factor
260337_at	1.59907	-0.677235	2.42083	-1.2755	27.3.32 RNA.regulation of transcription.WRKY domain transcription factor family	at1g69310	WRKY57; transcription factor
263536_at	2.05401	-1.03844	2.96718	-1.56909	27.3.32 RNA.regulation of transcription.WRKY domain transcription factor family	at2g25000	WRKY60; transcription factor
267246_at	1.97876	-0.984598	2.39131	-1.2578	27.3.32 RNA.regulation of transcription.WRKY domain transcription factor family	at2g30250	WRKY25; transcription factor
256427_at	1.55642	-0.63823	2.08053	-1.05695	27.3.37 RNA.regulation of transcription.AS2,Lateral Organ Boundaries Gene Family	at3g11090	LBD21 (LOB DOMAIN-CONTAINING PROTEIN 21)
263457_at	1.34671	-0.429437	1.91221	-0.935242	27.3.39 RNA.regulation of transcription.AtSR Transcription Factor family	at2g22300	SR1 (SIGNAL RESPONSIVE 1); calmodulin binding / transcription regulator
258797_at	1.43045	-0.516473	1.9199	-0.94103	27.3.40 RNA.regulation of transcription.Aux/IAA family	at3g04730	IAA16; transcription factor
264805_at	1.45541	-0.541426	1.48696	-0.572369	27.3.44 RNA.regulation of transcription.Chromatin Remodeling Factors	at1g08600	ATRX; ATP binding / DNA binding / helicase/ nucleic acid binding
253500_at	1.47261	-0.558376	1.72326	-0.785137	27.3.5 RNA.regulation of transcription.ARR	at4g31920	ARR10 (ARABIDOPSIS RESPONSE REGULATOR 10); transcription factor/ two-component response regulator
259164_at	1.51655	-0.600792	1.72049	-0.782821	27.3.52 RNA.regulation of transcription.Global transcription factor group	at3g01770	ATBET10 (Arabidopsis thaliana BROMODOMAIN AND EXTRATERMINAL DOMAIN PROTEIN 10); DNA binding
251849_at	1.48162	-0.567179	1.40785	-0.49349	27.3.54 RNA.regulation of transcription.Histone acetyltransferases	at3g54610	GCN5; DNA binding / H3 histone acetyltransferase/ histone acetyltransferase
261720_at	1.62854	-0.703576	2.7231	-1.44525	27.3.55 RNA.regulation of transcription.HDA	at1g08460	HDA08; histone deacetylase
258264_at	1.60886	-0.686042	1.86025	-0.8955	27.3.59 RNA.regulation of transcription.Methyl binding domain proteins	at3g15790	MBD11; DNA binding / methyl-CpG binding
245271_at	1.65262	-0.724758	2.44732	-1.2912	27.3.6 RNA.regulation of transcription.bHLH,Basic Helix-Loop-Helix family	at4g16430	basic helix-loop-helix (bHLH) family protein
245331_at	1.61303	-0.689778	1.42371	-0.509654	27.3.6 RNA.regulation of transcription.bHLH,Basic Helix-Loop-Helix family	at4g14410	basic helix-loop-helix (bHLH) family protein
247430_at	1.32987	-0.411282	1.59957	-0.677686	27.3.6 RNA.regulation of transcription.bHLH,Basic Helix-Loop-Helix family	at5g62610	basic helix-loop-helix (bHLH) family protein
258511_at	1.37806	-0.462644	2.29236	-1.19683	27.3.6 RNA.regulation of transcription.bHLH,Basic Helix-Loop-Helix family	at3g06590	transcription factor
259764_at	1.5766	-0.656816	1.68531	-0.753013	27.3.61 RNA.regulation of transcription.NPR1/NIM1	at1g64280	NPR1 (NONEXPRESSER OF PR GENES 1); protein binding / transcription activator
258787_at	2.5074	-1.32619	3.30992	-1.7268	27.3.64 RNA.regulation of transcription.PHOR1	at3g11840	PUB24 (PLANT U-BOX 24); binding / ubiquitin-protein ligase
247114_at	1.6845	-0.75232	1.63094	-0.705707	27.3.65 RNA.regulation of transcription.Polycomb Group (PcG)	at5g65910	BSD domain-containing protein
266720_s_at	1.49325	-0.578455	1.6642	-0.734827	27.3.66 RNA.regulation of transcription.Psudo ARR transcription factor family AND 27.3.99 RNA.regulation of transcription.unclassified	MULTIPLE HITS	ATARD1 (ACIREDUCTONE DIOXYGENASE 1); acireductone dioxygenase [iron(II)-requiring]/ metal
248067_at	1.49593	-0.581043	1.70302	-0.768096	27.3.67 RNA.regulation of transcription.putative transcription regulator	at5g55600	agenet domain-containing protein / bromo-adjacent homology (BAH) domain-containing protein
251644_at	2.18765	-1.12938	12.4092	-3.63334	27.3.67 RNA.regulation of transcription.putative transcription regulator	at3g57540	remorin family protein
261324_at	1.4973	-0.582366	2.08299	-1.05865	27.3.67 RNA.regulation of transcription.putative transcription regulator	at1g44770	unknown protein
261891_at	1.40617	-0.491774	1.47144	-0.557227	27.3.67 RNA.regulation of transcription.putative transcription regulator	at1g80790	XH/XS domain-containing protein / XS zinc finger domain-containing protein
264460_at	1.31794	-0.398283	1.41553	-0.501338	27.3.67 RNA.regulation of transcription.putative transcription regulator	at1g10170	ATNFXL1 (ARABIDOPSIS THALIANA NF-X-LIKE 1); protein binding / transcription factor/ zinc ion binding
265810_at	1.34838	-0.431222	1.43461	-0.520657	27.3.67 RNA.regulation of transcription.putative transcription regulator	at2g18090	PHD finger family protein / SWIB complex BAF60b domain-containing protein / GYF domain-containing protein
259336_at	1.39754	-0.482895	1.25834	-0.331521	27.3.69 RNA.regulation of transcription.SET-domain transcriptional regulator family	at3g03750	SET domain-containing protein
263537_at	1.29514	-0.373113	1.30345	-0.382339	27.3.7 RNA.regulation of transcription.C2C2(Zn) CO-like, Constans-like zinc finger family	at2g24790	COL3 (CONSTANS-LIKE 3); protein binding / transcription factor/ zinc ion binding
246953_at	1.53961	-0.622565	2.5344	-1.34164	27.3.71 RNA.regulation of transcription.SNF7	at5g04850	VPS60.2
247302_at	1.66159	-0.732562	2.8024	-1.48667	27.3.71 RNA.regulation of transcription.SNF7	at5g63880	VPS20.1
253735_at	1.90638	-0.930835	2.97675	-1.57374	27.3.71 RNA.regulation of transcription.SNF7	at4g29160	SNF7.1
265044_at	1.65006	-0.722519	2.5096	-1.32746	27.3.71 RNA.regulation of transcription.SNF7	at1g03950	VPS2.3 (VACUOLAR PROTEIN SORTING-ASSOCIATED PROTEIN 2.3)
265375_at	1.46389	-0.549804	2.17673	-1.12216	27.3.71 RNA.regulation of transcription.SNF7	at2g06530	VPS2.1
247601_at	1.35242	-0.435547	1.3228	-0.403598	27.3.8 RNA.regulation of transcription.C2C2(Zn) DOF zinc finger family	at5g60850	OBP4; DNA binding / transcription factor
265333_at	1.39463	-0.479878	1.60659	-0.684005	27.3.80 RNA.regulation of transcription.zf-HD	at2g18350	AtHB24 (ARABIDOPSIS THALIANA HOMEOBOX PROTEIN 24); DNA binding / transcription factor
263413_at	1.42173	-0.507647	1.3965	-0.48182	27.3.84 RNA.regulation of transcription.BBR/BPC	at2g21240	BPC4 (BASIC PENTACYSTEINE 4); DNA binding / transcription factor
245428_at	1.36339	-0.447195	1.54687	-0.629353	27.3.9 RNA.regulation of transcription.C2C2(Zn) GATA transcription factor family	at4g17570	zinc finger (GATA type) family protein
245087_at	1.3873	-0.472277	1.6199	-0.695906	27.3.99 RNA.regulation of transcription.unclassified	at2g39830	DAR2 (DA1-RELATED PROTEIN 2); zinc ion binding
246791_at	2.29519	-1.19862	4.55363	-2.18702	27.3.99 RNA.regulation of transcription.unclassified	at5g27280	zinc finger (DNL type) family protein
247554_at	2.30448	-1.20444	2.79962	-1.48523	27.3.99 RNA.regulation of transcription.unclassified	at5g61010	ATEXO70E2 (EXOCYST SUBUNIT EXO70 FAMILY PROTEIN E2); protein binding
247567_at	1.30746	-0.386769	1.65079	-0.723155	27.3.99 RNA.regulation of transcription.unclassified	at5g61190	zinc finger protein-related
247693_at	1.54198	-0.624781	1.64438	-0.717546	27.3.99 RNA.regulation of transcription.unclassified	at5g59730	ATEXO70H7 (EXOCYST SUBUNIT EXO70 FAMILY PROTEIN H7); protein binding
249843_at	1.49934	-0.584325	2.11193	-1.07856	27.3.99 RNA.regulation of transcription.unclassified	at5g23570	SGS3 (SUPPRESSOR OF GENE SILENCING 3)
250445_at	4.65431	-2.21857	4.71467	-2.23716	27.3.99 RNA.regulation of transcription.unclassified	at5g10760	aspartyl protease family protein
250446_at	1.85078	-0.888131	2.53376	-1.34128	27.3.99 RNA.regulation of transcription.unclassified	at5g10770	chloroplast nucleoid DNA-binding protein, putative
251634_at	1.37954	-0.46419	1.4536	-0.539632	27.3.99 RNA.regulation of transcription.unclassified	at3g57480	zinc finger (C2H2 type, AN1-like) family protein
254276_at	1.55228	-0.634388	3.07094	-1.61868	27.3.99 RNA.regulation of transcription.unclassified	at4g22820	zinc finger (AN1-like) family protein
254603_at	1.57549	-0.655801	1.74117	-0.800059	27.3.99 RNA.regulation of transcription.unclassified	at4g19045	protein binding
254861_at	1.43691	-0.522973	2.10381	-1.073	27.3.99 RNA.regulation of transcription.unclassified	at4g12040	zinc finger (AN1-like) family protein
256050_at	2.07315	-1.05183	2.28894	-1.19468	27.3.99 RNA.regulation of transcription.unclassified	at1g07000	ATEXO70B2 (exocyst subunit EXO70 family protein B2); protein binding
256231_at	1.38828	-0.473302	1.87277	-0.905176	27.3.99 RNA.regulation of transcription.unclassified	at3g12630	zinc finger (AN1-like) family protein
261711_at	2.28551	-1.19252	3.29943	-1.72222	27.3.99 RNA.regulation of transcription.unclassified	at1g32700	zinc-binding family protein
262194_at	1.40483	-0.490395	3.43546	-1.7805	27.3.99 RNA.regulation of transcription.unclassified	at1g77930	DNAJ heat shock N-terminal domain-containing protein
262314_at	2.6255	-1.39259	4.52414	-2.17764	27.3.99 RNA.regulation of transcription.unclassified	at1g70810	C2 domain-containing protein
262803_at	2.00347	-1.0025	6.58112	-2.71833	27.3.99 RNA.regulation of transcription.unclassified	at1g21000	zinc-binding family protein
263901_at	1.91832	-0.939847	1.43646	-0.522517	27.3.99 RNA.regulation of transcription.unclassified	at2g36320	zinc finger (AN1-like) family protein
264671_at	1.39692	-0.482245	1.77911	-0.831156	27.3.99 RNA.regulation of transcription.unclassified	at1g09920	TRAF-type zinc finger-related
265150_at	1.4251	-0.511061	2.30687	-1.20593	27.3.99 RNA.regulation of transcription.unclassified	at1g51200	zinc finger (AN1-like) family protein
265868_at	1.54037	-0.623273	2.25833	-1.17525	27.3.99 RNA.regulation of transcription.unclassified	at2g01650	PUX2 (PLANT UBX DOMAIN-CONTAINING PROTEIN 2); nucleic acid binding / zinc ion binding
266261_at	1.42413	-0.510081	2.13676	-1.09542	27.3.99 RNA.regulation of transcription.unclassified	at2g27580	zinc finger (AN1-like) family protein
245350_at	1.32974	-0.411149	2.23117	-1.1578	27.4 RNA.RNA binding	at4g16830	nuclear RNA-binding protein (RGGA)
248063_at	1.28864	-0.365851	1.29615	-0.374233	27.4 RNA.RNA binding	at5g55550	RNA recognition motif (RRM)-containing protein
248905_at	1.48389	-0.569389	1.71999	-0.782403	27.4 RNA.RNA binding	at5g46250	RNA recognition motif (RRM)-containing protein
251233_at	1.28952	-0.366831	1.91074	-0.934134	27.4 RNA.RNA binding	at3g62800	DRB4 (DOUBLE-STRANDED-RNA-BINDING PROTEIN 4); double-stranded RNA binding / protein binding
261487_at	1.49997	-0.584931	2.56548	-1.35923	27.4 RNA.RNA binding	at1g14340	RNA recognition motif (RRM)-containing protein
261709_at	1.39801	-0.483372	2.23024	-1.1572	27.4 RNA.RNA binding	at1g32790	RNA-binding protein, putative
264257_at	1.9257	-0.945383	1.51807	-0.602236	27.4 RNA.RNA binding	at1g09230	RNA recognition motif (RRM)-containing protein
265266_at	2.10178	-1.07161	4.05806	-2.02079	27.4 RNA.RNA binding	at2g42890	AML2 (ARABIDOPSIS-MEI2-LIKE 2); RNA binding / nucleic acid binding / nucleotide binding
260180_at	1.47117	-0.556966	1.59771	-0.676007	27.4 RNA.RNA binding AND 29.5.11.3 protein.degradation.ubiquitin.E2	MULTIPLE HITS	ATARD1 (ACIREDUCTONE DIOXYGENASE 1); acireductone dioxygenase [iron(II)-requiring]/ metal
259769_at	1.6913	-0.758133	2.90053	-1.53632	27.4 RNA.RNA binding AND 33.99 development.unspecified	at1g29400	AML5 (ARABIDOPSIS MEI2-LIKE PROTEIN 5); RNA binding / nucleic acid binding / nucleotide binding
246171_at	1.56471	-0.645895	2.15581	-1.10823	28.1 DNA.synthesis/chromatin structure	at5g32440	LOCATED IN: chloroplast; EXPRESSED IN: 24 plant structures; EXPRESSED DURING: 15 growth stages; CONTAINS InterPro DOMAIN/s: Ubiquitin system com
247225_at	1.6388	-0.712638	2.19402	-1.13358	28.1 DNA.synthesis/chromatin structure	at5g65090	BST1 (BRISTLED 1); hydrolase/ inositol or phosphatidylinositol phosphatase
250675_at	1.28198	-0.358373	1.77208	-0.82544	28.1 DNA.synthesis/chromatin structure	at5g06260	nucleolar protein-related
252593_at	1.39738	-0.48272	1.82939	-0.871359	28.1 DNA.synthesis/chromatin structure	at3g45590	ATSEN1 (SPLICING ENDONUCLEASE 1); nuclease/ nucleic acid binding / tRNA-intron endonuclease
264683_at	1.31905	-0.399503	1.73589	-0.795675	28.1 DNA.synthesis/chromatin structure	at1g65580	FRA3 (FRAGILE FIBER3); inositol or phosphatidylinositol phosphatase
265088_at	1.27339	-0.34867	1.30113	-0.37976	28.1 DNA.synthesis/chromatin structure	at1g03750	SWI2 (SWITCH 2); ATP binding / DNA binding / helicase/ nucleic acid binding
266511_at	1.54673	-0.629224	1.33273	-0.414386	28.1 DNA.synthesis/chromatin structure	at2g47680	zinc finger (CCCH type) helicase family protein
266572_at	2.34581	-1.23009	5.40383	-2.43398	28.1 DNA.synthesis/chromatin structure	at2g23840	HNH endonuclease domain-containing protein
255600_s_at	1.42025	-0.506146	2.23626	-1.16109	28.1 DNA.synthesis/chromatin structure AND 29.5.11.4.2 protein.degradation.ubiquitin.E3.RING	MULTIPLE HITS	ATARD1 (ACIREDUCTONE DIOXYGENASE 1); acireductone dioxygenase [iron(II)-requiring]/ metal
252754_at	1.45126	-0.537309	1.4168	-0.502636	28.1.1.3 DNA.synthesis/chromatin structure.retrotransposon/transposase.copia-like retrotransposon	at3g43510	transposable element gene
251011_at	1.48077	-0.566348	3.17677	-1.66756	28.1.3.2.1 DNA.synthesis/chromatin structure.histone.core.H2A	at5g02560	HTA12; DNA binding
263412_at	1.74944	-0.806895	1.7545	-0.811063	28.1.3.2.2 DNA.synthesis/chromatin structure.histone.core.H2B	at2g28720	histone H2B, putative
248555_at	1.47445	-0.560175	1.68481	-0.752582	28.2 DNA.repair	at5g50340	ATP binding / damaged DNA binding / nucleoside-triphosphatase/ nucleotide binding
259434_at	1.51424	-0.598591	1.52594	-0.609703	28.2 DNA.repair	at1g01490	heavy-metal-associated domain-containing protein
247374_at	1.62411	-0.699645	2.07224	-1.05119	28.99 DNA.unspecified	at5g63190	MA3 domain-containing protein
253183_at	1.26477	-0.338874	1.68097	-0.74929	28.99 DNA.unspecified	at4g35220	cyclase family protein
253273_at	1.52608	-0.609832	2.48352	-1.31239	28.99 DNA.unspecified	at4g34180	cyclase family protein
266306_at	1.59454	-0.67314	1.75824	-0.814129	28.99 DNA.unspecified	at2g26970	exonuclease family protein
250754_at	1.33729	-0.419315	1.92372	-0.943899	29.1.19 protein.aa activation.arginine-tRNA ligase	at5g05700	ATE1 (ARGININE-TRNA PROTEIN TRANSFERASE 1); arginyltransferase
262287_at	1.62264	-0.69834	2.93592	-1.55381	29.2.1.1.3.2.1712 protein.synthesis.ribosomal protein.prokaryotic.unknown organellar.50S subunit.L7/L12	at1g68660	FUNCTIONS IN: molecular_function unknown; INVOLVED IN: protein catabolic process; EXPRESSED IN: 23 plant structures; EXPRESSED DURING: 14 growth
248126_at	1.40294	-0.488451	2.03856	-1.02755	29.2.3 protein.synthesis.initiation	at5g54760	eukaryotic translation initiation factor SUI1, putative
248146_at	1.84906	-0.886792	2.84817	-1.51003	29.2.3 protein.synthesis.initiation	at5g54940	eukaryotic translation initiation factor SUI1, putative
249711_at	1.46087	-0.546828	1.91724	-0.939031	29.2.3 protein.synthesis.initiation	at5g35680	eukaryotic translation initiation factor 1A, putative / eIF-1A, putative / eIF-4C, putative
254664_at	1.56409	-0.645321	1.83255	-0.873852	29.2.3 protein.synthesis.initiation	at4g18300	eIF4-gamma/eIF5/eIF2-epsilon domain-containing protein
260350_at	1.60721	-0.684562	2.56416	-1.35848	29.2.3 protein.synthesis.initiation	at1g69410	ELF5A-3 (EUKARYOTIC ELONGATION FACTOR 5A-3); translation initiation factor
263110_at	1.3067	-0.385933	1.5919	-0.670752	29.2.3 protein.synthesis.initiation	at1g65220	eIF4-gamma/eIF5/eIF2-epsilon domain-containing protein
262669_at	1.34719	-0.429952	1.53822	-0.621261	29.2.5 protein.synthesis.release	at1g62850	translation release factor
253882_at	1.31013	-0.38971	1.63323	-0.707726	29.2.99 protein.synthesis.misc	at4g27650	PEL1 (PELOTA); translation release factor
255941_at	1.87206	-0.904624	3.37055	-1.75298	29.3.2 protein.targeting.mitochondria	at1g20350	ATTIM17-1; P-P-bond-hydrolysis-driven protein transmembrane transporter/ protein transporter
260687_at	1.50304	-0.587888	1.97493	-0.981804	29.3.2 protein.targeting.mitochondria	at1g17530	ATTIM23-1 (TRANSLOCASE OF INNER MITOCHONDRIAL MEMBRANE 23); P-P-bond-hydrolysis-driven protein transmembrane transporter
255430_at	1.57978	-0.659726	6.02497	-2.59095	29.3.3 protein.targeting.chloroplast	at4g03320	tic20-IV (TRANSLOCON AT THE INNER ENVELOPE MEMBRANE OF CHLOROPLASTS 20-IV)
265325_at	1.52812	-0.611758	2.55243	-1.35187	29.3.4.1 protein.targeting.secretory pathway.ER	at2g18240	RER1 protein, putative
248221_at	1.28833	-0.365507	1.63635	-0.710478	29.3.4.3 protein.targeting.secretory pathway.vacuole	at5g53530	VPS26A (VACUOLAR PROTEIN SORTING 26A)
250831_at	1.52449	-0.608324	1.44575	-0.531822	29.3.4.3 protein.targeting.secretory pathway.vacuole	at5g04920	vacuolar protein sorting 36 family protein / VPS36 family protein
253358_at	3.44014	-1.78247	14.9213	-3.8993	29.3.4.3 protein.targeting.secretory pathway.vacuole	at4g32940	GAMMA-VPE (GAMMA VACUOLAR PROCESSING ENZYME); cysteine-type endopeptidase
254500_at	4.47675	-2.16245	10.449	-3.3853	29.3.4.3 protein.targeting.secretory pathway.vacuole	at4g20110	vacuolar sorting receptor, putative
262695_at	1.39583	-0.481121	2.0775	-1.05485	29.3.4.3 protein.targeting.secretory pathway.vacuole	at1g75850	VPS35B (VPS35 HOMOLOG B)
267412_at	1.74408	-0.802462	1.49517	-0.580314	29.3.4.3 protein.targeting.secretory pathway.vacuole	at2g34940	vacuolar sorting receptor, putative
251257_at	1.31774	-0.398061	1.61546	-0.691945	29.3.4.99 protein.targeting.secretory pathway.unspecified	at3g62290	ATARFA1E (ADP-ribosylation factor A1E); GTP binding / phospholipase activator/ protein binding
252937_at	1.58335	-0.662978	2.62307	-1.39126	29.3.4.99 protein.targeting.secretory pathway.unspecified	at4g39180	SEC14; phosphatidylinositol transporter
253625_at	1.33246	-0.414089	2.15736	-1.10927	29.3.4.99 protein.targeting.secretory pathway.unspecified	at4g30600	signal recognition particle receptor alpha subunit family protein
254476_at	1.45405	-0.540081	1.78461	-0.835608	29.3.4.99 protein.targeting.secretory pathway.unspecified	at4g20410	GSNAP (GAMMA-SOLUBLE NSF ATTACHMENT PROTEIN); binding / transporter
259804_at	1.61703	-0.693343	1.74334	-0.801855	29.3.4.99 protein.targeting.secretory pathway.unspecified	at1g72160	SEC14 cytosolic factor family protein / phosphoglyceride transfer family protein
261116_at	1.44799	-0.534048	1.57606	-0.656321	29.3.4.99 protein.targeting.secretory pathway.unspecified	at1g75370	SEC14 cytosolic factor, putative / phosphatidylinositol transfer-like protein, putative
266694_at	1.32862	-0.409927	1.49618	-0.581281	29.3.4.99 protein.targeting.secretory pathway.unspecified	at2g19790	clathrin adaptor complex small chain family protein
260844_at	1.27663	-0.352341	1.49597	-0.58108	29.3.5 protein.targeting.peroxisomes	at1g29260	PEX7; peroxisome matrix targeting signal-2 binding / protein binding
266925_at	1.2826	-0.359076	1.93622	-0.953246	29.3.5 protein.targeting.peroxisomes	at2g45740	PEX11D
245775_at	1.46713	-0.552996	2.63331	-1.39688	29.4 protein.postranslational modification	at1g30270	CIPK23 (CBL-INTERACTING PROTEIN KINASE 23); kinase/ protein binding / protein serine/threonine kinas
246009_at	1.43459	-0.520634	1.54126	-0.624112	29.4 protein.postranslational modification	at5g08335	ATSTE14B; protein-S-isoprenylcysteine O-methyltransferase
246756_at	1.58801	-0.667223	4.28478	-2.09922	29.4 protein.postranslational modification	at5g27930	protein phosphatase 2C, putative / PP2C, putative
247514_at	1.64536	-0.718401	4.37212	-2.12833	29.4 protein.postranslational modification	at5g61640	PMSR1 (PEPTIDEMETHIONINE SULFOXIDE REDUCTASE 1); oxidoreductase, acting on sulfur group of donors, disulfide as accept
247602_at	2.08674	-1.06125	1.9441	-0.9591	29.4 protein.postranslational modification	at5g60900	RLK1 (RECEPTOR-LIKE PROTEIN KINASE 1); ATP binding / carbohydrate binding / kinase/ protein kinase/ protein serine/threonine kin
247829_at	1.35952	-0.443099	1.45686	-0.542859	29.4 protein.postranslational modification	at5g58520	protein kinase family protein
247867_at	1.48386	-0.56935	1.45874	-0.544726	29.4 protein.postranslational modification	at5g57630	CIPK21 (CBL-interacting protein kinase 21); ATP binding / kinase/ protein kinase/ protein serine/threonine kinase
248270_at	1.3355	-0.41738	1.98095	-0.986192	29.4 protein.postranslational modification	at5g53450	ORG1 (OBP3-responsive gene 1); ATP binding / kinase/ protein kinase
248826_at	1.36316	-0.446955	1.87701	-0.908438	29.4 protein.postranslational modification	at5g47080	CKB1; protein kinase regulator
250021_at	1.20174	-0.265129	1.65099	-0.723329	29.4 protein.postranslational modification	at5g18190	protein kinase family protein
250400_at	1.8813	-0.911729	4.65707	-2.21942	29.4 protein.postranslational modification	at5g10740	protein phosphatase 2C-related / PP2C-related
250408_at	1.64167	-0.715163	3.18663	-1.67203	29.4 protein.postranslational modification	at5g10930	CIPK5 (CBL-INTERACTING PROTEIN KINASE 5); ATP binding / kinase/ protein kinase/ protein serine/threonine kinase
250609_at	1.28924	-0.366519	2.21579	-1.14782	29.4 protein.postranslational modification	at5g07470	PMSR3 (PEPTIDEMETHIONINE SULFOXIDE REDUCTASE 3); oxidoreductase, acting on sulfur group of donors, disulfide as accept
250644_at	1.65545	-0.727222	1.85433	-0.890896	29.4 protein.postranslational modification	at5g06750	protein phosphatase 2C family protein / PP2C family protein
250911_at	1.52159	-0.605579	1.65824	-0.729654	29.4 protein.postranslational modification	at5g03730	CTR1 (CONSTITUTIVE TRIPLE RESPONSE 1); kinase/ protein binding / protein serine/threonine kinase/ protein serine/threonine
251273_at	1.56546	-0.64659	2.19552	-1.13456	29.4 protein.postranslational modification	at3g61960	protein kinase family protein
251621_at	2.17522	-1.12116	1.67463	-0.74384	29.4 protein.postranslational modification	at3g57700	protein kinase, putative
252067_at	1.4366	-0.52266	1.77373	-0.826784	29.4 protein.postranslational modification	at3g51370	protein phosphatase 2C, putative / PP2C, putative
252166_at	1.62216	-0.697913	1.6814	-0.749664	29.4 protein.postranslational modification	at3g50500	SNRK2.2 (SNF1-RELATED PROTEIN KINASE 2.2); kinase/ protein kinase
253550_at	1.67855	-0.747213	3.13118	-1.64671	29.4 protein.postranslational modification	at4g30960	SIP3 (SOS3-INTERACTING PROTEIN 3); ATP binding / kinase/ protein kinase/ protein serine/threonine kina
253564_at	1.29599	-0.374052	1.91274	-0.935644	29.4 protein.postranslational modification	at4g31170	protein kinase family protein
253714_at	1.64977	-0.722261	2.09541	-1.06723	29.4 protein.postranslational modification	at4g29380	protein kinase family protein / WD-40 repeat family protein
253834_at	1.44452	-0.530586	1.90641	-0.930856	29.4 protein.postranslational modification	at4g27800	protein phosphatase 2C PPH1 / PP2C PPH1 (PPH1)
255148_at	2.71319	-1.43999	3.15462	-1.65747	29.4 protein.postranslational modification	at4g08470	MAPKKK10; ATP binding / kinase/ protein kinase/ protein serine/threonine kinase
255301_at	1.41364	-0.499417	1.78435	-0.8354	29.4 protein.postranslational modification	at4g04800	methionine sulfoxide reductase domain-containing protein / SeIR domain-containing protein
255302_at	1.95965	-0.970598	6.71329	-2.74702	29.4 protein.postranslational modification	at4g04830	methionine sulfoxide reductase domain-containing protein / SeIR domain-containing protein
255631_at	1.26328	-0.337176	1.86892	-0.902203	29.4 protein.postranslational modification	at4g00710	BSK3 (BR-SIGNALING KINASE 3); ATP binding / binding / kinase/ protein kinase/ protein tyrosine kinase
256995_at	1.49391	-0.579091	1.70927	-0.773384	29.4 protein.postranslational modification	at3g25840	protein kinase family protein
257771_at	1.57061	-0.651329	2.41634	-1.27282	29.4 protein.postranslational modification	at3g23000	CIPK7 (CBL-INTERACTING PROTEIN KINASE 7); ATP binding / kinase/ protein kinase/ protein serine/
259965_at	1.35933	-0.4429	1.94311	-0.958368	29.4 protein.postranslational modification	at1g53670	MSRB1 (methionine sulfoxide reductase B 1); peptide-methionine-(S)-S-oxide reductase
260774_at	1.58244	-0.662146	1.89602	-0.922978	29.4 protein.postranslational modification	at1g78290	serine/threonine protein kinase, putative
262408_at	1.98784	-0.991204	1.99741	-0.99813	29.4 protein.postranslational modification	at1g34750	protein phosphatase 2C, putative / PP2C, putative
262507_at	1.92281	-0.943213	1.89332	-0.920922	29.4 protein.postranslational modification	at1g11330	S-locus lectin protein kinase family protein
263297_at	1.5983	-0.676539	3.49035	-1.80337	29.4 protein.postranslational modification	at2g15310	ATARFB1A (ADP-ribosylation factor B1A); GTP binding
263461_at	1.85082	-0.888163	2.26285	-1.17814	29.4 protein.postranslational modification	at2g31800	ankyrin protein kinase, putative
264376_at	1.29753	-0.375768	1.37051	-0.454716	29.4 protein.postranslational modification	at2g25070	protein phosphatase 2C, putative / PP2C, putative
265855_at	1.46749	-0.553351	1.54227	-0.625055	29.4 protein.postranslational modification	at2g42390	protein kinase C substrate, heavy chain-related
267490_at	1.38569	-0.470601	1.67904	-0.747634	29.4 protein.postranslational modification	at2g19130	S-locus lectin protein kinase family protein
253646_at	1.85129	-0.888529	1.96002	-0.970867	29.4.1 protein.postranslational modification.kinase AND 30.6 signalling.MAP kinases	at4g29810	ATMKK2 (ARABIDOPSIS THALIANA MAP KINASE KINASE 2); MAP kinase kinase/ kinase
250365_at	1.86824	-0.901678	1.99898	-0.999261	29.4.1.52 protein.postranslational modification.kinase.receptor like cytoplasmatic kinase II	at5g11410	protein kinase family protein
247740_at	1.64271	-0.716078	2.53091	-1.33966	29.4.1.54 protein.postranslational modification.kinase.receptor like cytoplasmatic kinase IV	at5g58940	CRCK1 (CALMODULIN-BINDING RECEPTOR-LIKE CYTOPLASMIC KINASE 1); ATP binding / kinase/ protein kinase/ protein serine/threonine k
250990_at	1.61527	-0.691774	2.142	-1.09896	29.4.1.57 protein.postranslational modification.kinase.receptor like cytoplasmatic kinase VII	at5g02290	NAK; ATP binding / kinase/ protein kinase/ protein serine/threonine kinase/ protein tyrosine kinase
251789_at	1.71739	-0.780218	1.72284	-0.784791	29.4.1.57 protein.postranslational modification.kinase.receptor like cytoplasmatic kinase VII	at3g55450	protein kinase, putative
259887_at	1.41125	-0.496978	2.197	-1.13554	29.4.1.57 protein.postranslational modification.kinase.receptor like cytoplasmatic kinase VII	at1g76360	protein kinase, putative
261526_at	2.2304	-1.15731	3.82505	-1.93548	29.4.1.57 protein.postranslational modification.kinase.receptor like cytoplasmatic kinase VII	at1g14370	APK2A (PROTEIN KINASE 2A); ATP binding / kinase/ protein kinase/ protein serine/threonine kinase
266428_at	1.75311	-0.80992	1.61202	-0.688871	29.4.1.57 protein.postranslational modification.kinase.receptor like cytoplasmatic kinase VII	at2g07180	protein kinase, putative
266781_at	1.49154	-0.576804	2.11966	-1.08384	29.4.1.57 protein.postranslational modification.kinase.receptor like cytoplasmatic kinase VII	at2g28940	protein kinase family protein
254063_at	1.50219	-0.587065	2.0714	-1.05061	29.4.1.61 protein.postranslational modification.kinase.receptor like cytoplasmatic kinase X	at4g25390	protein kinase family protein
245626_at	1.58836	-0.667534	3.1591	-1.65951	29.5 protein.degradation	at1g56700	pyrrolidone-carboxylate peptidase family protein
247156_at	1.38297	-0.467766	1.74948	-0.806923	29.5 protein.degradation	at5g65760	serine carboxypeptidase S28 family protein
248615_at	1.6606	-0.731706	2.00426	-1.00307	29.5 protein.degradation	at5g49570	AtPNG1 (Arabidopsis thaliana peptide-N-glycanase 1); catalytic/ peptide-N4-(N-acetyl-beta-glucosaminyl)asparagine amidase
251038_at	1.20742	-0.271922	1.5517	-0.633847	29.5 protein.degradation	at5g02240	binding / catalytic/ coenzyme binding
251327_at	1.3141	-0.39407	1.68463	-0.752429	29.5 protein.degradation	at3g61540	peptidase family protein
253704_at	1.4459	-0.531967	2.41948	-1.27469	29.5 protein.degradation	at4g29490	aminopeptidase/ manganese ion binding
254690_at	1.39959	-0.485009	1.82949	-0.871444	29.5 protein.degradation	at4g17830	peptidase M20/M25/M40 family protein
255036_at	1.43297	-0.519011	1.64353	-0.716797	29.5 protein.degradation	at4g09560	peptidase/ protein binding / zinc ion binding
257791_at	1.49286	-0.578083	4.01415	-2.00509	29.5 protein.degradation	at3g27110	peptidase M48 family protein
258105_at	1.67136	-0.741025	2.01373	-1.00987	29.5 protein.degradation	at3g23605	UBX domain-containing protein
258923_at	1.7188	-0.781398	4.0323	-2.0116	29.5 protein.degradation	at3g10450	SCPL7 (SERINE CARBOXYPEPTIDASE-LIKE 7); serine-type carboxypeptidase
264250_at	1.39486	-0.480117	2.82153	-1.49648	29.5 protein.degradation	at1g78680	ATGGH2 (gamma-glutamyl hydrolase 2); omega peptidase
264300_at	2.90963	-1.54084	8.27496	-3.04875	29.5 protein.degradation	at1g78670	ATGGH3 (gamma-glutamyl hydrolase 3); catalytic/ hydrolase/ omega peptidase
265926_at	1.3872	-0.472172	2.11205	-1.07864	29.5 protein.degradation	at2g18600	RUB1-conjugating enzyme, putative
265996_at	1.34701	-0.429762	1.46225	-0.548193	29.5 protein.degradation	at2g24200	cytosol aminopeptidase
245088_at	1.64802	-0.720733	2.70279	-1.43445	29.5.1 protein.degradation.subtilases	at2g39850	identical protein binding / serine-type endopeptidase
247760_at	2.47362	-1.30662	4.84982	-2.27793	29.5.1 protein.degradation.subtilases	at5g59130	subtilase family protein
250126_at	1.35419	-0.437428	1.35064	-0.433647	29.5.11 protein.degradation.ubiquitin	at5g16310	UCH1; ubiquitin thiolesterase
251042_at	1.33631	-0.418252	1.49287	-0.578092	29.5.11 protein.degradation.ubiquitin	at5g02310	PRT6 (PROTEOLYSIS 6); ubiquitin-protein ligase
254144_at	1.32266	-0.403442	2.03536	-1.02528	29.5.11 protein.degradation.ubiquitin	at4g24690	ubiquitin-associated (UBA)/TS-N domain-containing protein / octicosapeptide/Phox/Bemp1 (PB1) domain-containing protein
255951_at	1.38492	-0.469801	1.50403	-0.588835	29.5.11 protein.degradation.ubiquitin	at1g22050	MUB6 (MEMBRANE-ANCHORED UBIQUITIN-FOLD PROTEIN 6 PRECURSOR)
256013_at	1.56715	-0.648141	1.95943	-0.970437	29.5.11 protein.degradation.ubiquitin	at1g19270	DA1 (DA 1); ubiquitin binding
248092_at	2.25899	-1.17568	2.51197	-1.32882	29.5.11.1 protein.degradation.ubiquitin.ubiquitin	at5g55170	SUMO3 (SMALL UBIQUITIN-LIKE MODIFIER 3); protein binding / protein tag
249217_at	1.54542	-0.628001	2.00763	-1.0055	29.5.11.1 protein.degradation.ubiquitin.ubiquitin	at5g42300	UBL5 (UBIQUITIN-LIKE PROTEIN 5)
254106_at	1.53242	-0.615814	2.70832	-1.4374	29.5.11.1 protein.degradation.ubiquitin.ubiquitin	at4g24990	ATGP4
255459_at	1.50148	-0.58639	1.59628	-0.674711	29.5.11.1 protein.degradation.ubiquitin.ubiquitin	at4g02890	UBQ14; protein binding
251917_at	1.39326	-0.478463	2.61304	-1.38573	29.5.11.20 protein.degradation.ubiquitin.proteasom	at3g53970	proteasome inhibitor-related
264657_at	1.48197	-0.567516	2.54489	-1.3476	29.5.11.20 protein.degradation.ubiquitin.proteasom	at1g09100	RPT5B (26S proteasome AAA-ATPase subunit RPT5B); ATPase/ calmodulin binding
264967_at	1.31746	-0.39776	1.45224	-0.538284	29.5.11.20 protein.degradation.ubiquitin.proteasom	at1g67250	proteasome maturation factor UMP1 family protein
247433_at	1.2842	-0.36087	1.69003	-0.757046	29.5.11.3 protein.degradation.ubiquitin.E2	at5g62540	UBC3 (ubiquitin-conjugating enzyme 3); ubiquitin-protein ligase
247999_at	1.45322	-0.539256	2.34748	-1.23111	29.5.11.3 protein.degradation.ubiquitin.E2	at5g56150	UBC30 (ubiquitin-conjugating enzyme 30); ubiquitin-protein ligase
249265_at	1.38797	-0.472972	2.2051	-1.14084	29.5.11.3 protein.degradation.ubiquitin.E2	at5g41700	UBC8 (UBIQUITIN CONJUGATING ENZYME 8); protein binding / ubiquitin-protein ligase
249299_at	1.37244	-0.456741	2.3781	-1.24981	29.5.11.3 protein.degradation.ubiquitin.E2	at5g41340	UBC4 (UBIQUITIN CONJUGATING ENZYME 4); ubiquitin-protein ligase
251561_at	1.36083	-0.444482	1.20153	-0.264875	29.5.11.3 protein.degradation.ubiquitin.E2	at3g57870	SCE1 (SUMO CONJUGATION ENZYME 1); SUMO ligase
257893_at	1.34788	-0.430692	2.09961	-1.07012	29.5.11.3 protein.degradation.ubiquitin.E2	at3g17000	UBC32 (ubiquitin-conjugating enzyme 32); ubiquitin-protein ligase
258382_at	1.29541	-0.373412	1.27063	-0.345541	29.5.11.3 protein.degradation.ubiquitin.E2	at3g15355	UBC25 (UBIQUITIN-CONJUGATING ENZYME 25); small conjugating protein ligase
258678_at	1.70311	-0.768172	3.73114	-1.89962	29.5.11.3 protein.degradation.ubiquitin.E2	at3g08690	UBC11 (UBIQUITIN-CONJUGATING ENZYME 11); ubiquitin-protein ligase
260317_at	2.28303	-1.19095	3.60855	-1.85142	29.5.11.3 protein.degradation.ubiquitin.E2	at1g63800	UBC5 (ubiquitin-conjugating enzyme 5); ubiquitin-protein ligase
262990_at	1.67417	-0.743449	1.92328	-0.94357	29.5.11.3 protein.degradation.ubiquitin.E2	at1g23260	MMZ1 (MMS ZWEI HOMOLOGUE 1); protein binding / ubiquitin-protein ligase
263949_at	1.45793	-0.54392	1.84877	-0.886567	29.5.11.3 protein.degradation.ubiquitin.E2	at2g36060	ubiquitin-conjugating enzyme family protein
265357_at	1.48699	-0.572392	3.31049	-1.72704	29.5.11.3 protein.degradation.ubiquitin.E2	at2g16740	UBC29 (ubiquitin-conjugating enzyme 29); ubiquitin-protein ligase
267484_at	1.36197	-0.445696	2.44533	-1.29003	29.5.11.3 protein.degradation.ubiquitin.E2	at2g02760	ATUBC2 (UBIQUITING-CONJUGATING ENZYME 2); ubiquitin-protein ligase
250988_at	1.35096	-0.433986	2.02512	-1.01801	29.5.11.4.1 protein.degradation.ubiquitin.E3.HECT	at5g02880	UPL4; ubiquitin-protein ligase
245781_at	1.2898	-0.367151	2.03493	-1.02498	29.5.11.4.2 protein.degradation.ubiquitin.E3.RING	at1g45976	SBP1 (s-ribonuclease binding protein 1); protein binding / zinc ion binding
246233_at	1.57866	-0.658696	1.39684	-0.482167	29.5.11.4.2 protein.degradation.ubiquitin.E3.RING	at4g36550	binding / ubiquitin-protein ligase
246968_at	1.54832	-0.630699	3.36264	-1.74959	29.5.11.4.2 protein.degradation.ubiquitin.E3.RING	at5g24870	zinc finger (C3HC4-type RING finger) family protein
246988_at	1.68344	-0.751415	2.1422	-1.0991	29.5.11.4.2 protein.degradation.ubiquitin.E3.RING	at5g67340	armadillo/beta-catenin repeat family protein / U-box domain-containing protein
247312_at	1.41069	-0.4964	1.77819	-0.830406	29.5.11.4.2 protein.degradation.ubiquitin.E3.RING	at5g63970	copine-related
247792_at	1.56339	-0.64468	2.41812	-1.27388	29.5.11.4.2 protein.degradation.ubiquitin.E3.RING	at5g58787	zinc finger (C3HC4-type RING finger) family protein
249308_at	1.37254	-0.45685	2.14778	-1.10285	29.5.11.4.2 protein.degradation.ubiquitin.E3.RING	at5g41350	zinc finger (C3HC4-type RING finger) family protein
249483_at	1.55434	-0.636303	3.22167	-1.68781	29.5.11.4.2 protein.degradation.ubiquitin.E3.RING	at5g38895	zinc finger (C3HC4-type RING finger) family protein
250435_at	3.19752	-1.67695	4.50348	-2.17104	29.5.11.4.2 protein.degradation.ubiquitin.E3.RING	at5g10380	RING1; protein binding / ubiquitin-protein ligase/ zinc ion binding
250931_at	1.52271	-0.606638	2.83472	-1.5032	29.5.11.4.2 protein.degradation.ubiquitin.E3.RING	at5g03200	zinc finger (C3HC4-type RING finger) family protein
251066_at	1.42781	-0.513809	3.92471	-1.97258	29.5.11.4.2 protein.degradation.ubiquitin.E3.RING	at5g01880	zinc finger (C3HC4-type RING finger) family protein
251084_at	1.52962	-0.613171	2.53607	-1.3426	29.5.11.4.2 protein.degradation.ubiquitin.E3.RING	at5g01520	zinc finger (C3HC4-type RING finger) family protein
251403_at	1.4357	-0.521753	1.66312	-0.733894	29.5.11.4.2 protein.degradation.ubiquitin.E3.RING	at3g60300	RWD domain-containing protein
252464_at	2.17792	-1.12295	3.51664	-1.8142	29.5.11.4.2 protein.degradation.ubiquitin.E3.RING	at3g47160	protein binding / zinc ion binding
253236_at	1.48497	-0.570431	1.69169	-0.758462	29.5.11.4.2 protein.degradation.ubiquitin.E3.RING	at4g34370	ARI1 (ARIADNE); protein binding / zinc ion binding
253539_at	1.65452	-0.726412	2.51001	-1.32769	29.5.11.4.2 protein.degradation.ubiquitin.E3.RING	at4g31450	zinc finger (C3HC4-type RING finger) family protein
253806_at	2.49594	-1.31959	5.12278	-2.35693	29.5.11.4.2 protein.degradation.ubiquitin.E3.RING	at4g28270	zinc finger (C3HC4-type RING finger) family protein
253865_at	1.62075	-0.69666	1.75306	-0.809877	29.5.11.4.2 protein.degradation.ubiquitin.E3.RING	at4g27470	zinc finger (C3HC4-type RING finger) family protein
254210_at	1.5449	-0.627517	1.38799	-0.472999	29.5.11.4.2 protein.degradation.ubiquitin.E3.RING	at4g23450	zinc finger (C3HC4-type RING finger) family protein
254533_at	1.35362	-0.436828	2.17272	-1.1195	29.5.11.4.2 protein.degradation.ubiquitin.E3.RING	at4g19670	zinc finger (C3HC4-type RING finger) family protein
254919_at	1.69141	-0.758226	2.04477	-1.03194	29.5.11.4.2 protein.degradation.ubiquitin.E3.RING	at4g11360	RHA1B; protein binding / zinc ion binding
256958_at	1.4569	-0.542899	1.69114	-0.758	29.5.11.4.2 protein.degradation.ubiquitin.E3.RING	at3g13430	zinc finger (C3HC4-type RING finger) family protein
258714_at	1.4242	-0.51015	2.09438	-1.06652	29.5.11.4.2 protein.degradation.ubiquitin.E3.RING	at3g09770	zinc finger (C3HC4-type RING finger) family protein
259019_at	1.37777	-0.46233	1.62225	-0.697999	29.5.11.4.2 protein.degradation.ubiquitin.E3.RING	at3g07370	CHIP (CARBOXYL TERMINUS OF HSC70-INTERACTING PROTEIN); ubiquitin-protein ligase
259356_at	1.53637	-0.619526	2.34999	-1.23266	29.5.11.4.2 protein.degradation.ubiquitin.E3.RING	at3g05250	zinc finger (C3HC4-type RING finger) family protein
260231_at	1.70801	-0.772312	3.67847	-1.87911	29.5.11.4.2 protein.degradation.ubiquitin.E3.RING	at1g74410	zinc finger (C3HC4-type RING finger) family protein
260330_at	1.334	-0.41576	1.39616	-0.481461	29.5.11.4.2 protein.degradation.ubiquitin.E3.RING	at1g80400	zinc finger (C3HC4-type RING finger) family protein
260648_at	2.12079	-1.0846	1.90515	-0.929906	29.5.11.4.2 protein.degradation.ubiquitin.E3.RING	at1g08050	zinc finger (C3HC4-type RING finger) family protein
260690_at	1.73981	-0.798928	2.39511	-1.26009	29.5.11.4.2 protein.degradation.ubiquitin.E3.RING	at1g32340	NHL8; protein binding / zinc ion binding
260753_at	1.4724	-0.558166	1.79068	-0.840507	29.5.11.4.2 protein.degradation.ubiquitin.E3.RING	at1g49230	zinc finger (C3HC4-type RING finger) family protein
261677_at	1.4107	-0.496415	2.33517	-1.22353	29.5.11.4.2 protein.degradation.ubiquitin.E3.RING	at1g18470	zinc finger (C3HC4-type RING finger) family protein
261852_at	1.69033	-0.757307	2.19445	-1.13386	29.5.11.4.2 protein.degradation.ubiquitin.E3.RING	at1g50440	zinc finger (C3HC4-type RING finger) family protein
261927_at	2.11011	-1.07731	1.58927	-0.668362	29.5.11.4.2 protein.degradation.ubiquitin.E3.RING	at1g22500	zinc finger (C3HC4-type RING finger) family protein
262782_at	1.48564	-0.571088	2.40157	-1.26398	29.5.11.4.2 protein.degradation.ubiquitin.E3.RING	at1g13195	zinc finger (C3HC4-type RING finger) family protein
263325_at	1.43267	-0.518704	2.88525	-1.52869	29.5.11.4.2 protein.degradation.ubiquitin.E3.RING	at2g04240	XERICO; protein binding / zinc ion binding
263424_at	1.4219	-0.507823	1.95217	-0.965078	29.5.11.4.2 protein.degradation.ubiquitin.E3.RING	at2g31510	IBR domain-containing protein / ARIADNE-like protein ARI7 (ARI7)
264091_at	1.39917	-0.484567	2.69943	-1.43265	29.5.11.4.2 protein.degradation.ubiquitin.E3.RING	at1g79110	protein binding / zinc ion binding
265472_at	1.39976	-0.485184	1.7819	-0.833418	29.5.11.4.2 protein.degradation.ubiquitin.E3.RING	at2g15580	zinc finger (C3HC4-type RING finger) family protein
247721_at	1.32472	-0.405691	1.89457	-0.921871	29.5.11.4.3.1 protein.degradation.ubiquitin.E3.SCF.SKP	at5g59140	SKP1 family protein
247863_at	1.9274	-0.946653	4.57435	-2.19357	29.5.11.4.3.1 protein.degradation.ubiquitin.E3.SCF.SKP	at5g57900	SKIP1 (SKP1 INTERACTING PARTNER 1); protein binding
248289_at	1.34693	-0.429673	1.59839	-0.676619	29.5.11.4.3.2 protein.degradation.ubiquitin.E3.SCF.FBOX	at5g52880	F-box family protein
249974_at	1.39713	-0.48247	2.41612	-1.27269	29.5.11.4.3.2 protein.degradation.ubiquitin.E3.SCF.FBOX	at5g18780	F-box family protein
255469_at	1.79018	-0.840101	2.85157	-1.51176	29.5.11.4.3.2 protein.degradation.ubiquitin.E3.SCF.FBOX	at4g03030	kelch repeat-containing F-box family protein
255947_at	1.52252	-0.606466	2.24845	-1.16893	29.5.11.4.3.2 protein.degradation.ubiquitin.E3.SCF.FBOX	at1g22040	kelch repeat-containing F-box family protein
256161_at	1.45746	-0.543456	2.02595	-1.0186	29.5.11.4.3.2 protein.degradation.ubiquitin.E3.SCF.FBOX	at1g30090	kelch repeat-containing F-box family protein
256353_at	1.30974	-0.389281	1.51115	-0.595647	29.5.11.4.3.2 protein.degradation.ubiquitin.E3.SCF.FBOX	at1g55000	peptidoglycan-binding LysM domain-containing protein
256399_at	1.41952	-0.505404	1.79837	-0.846689	29.5.11.4.3.2 protein.degradation.ubiquitin.E3.SCF.FBOX	at3g06240	F-box family protein
260310_at	1.45842	-0.544403	1.73856	-0.797891	29.5.11.4.3.2 protein.degradation.ubiquitin.E3.SCF.FBOX	at1g70590	F-box family protein
260486_at	1.55021	-0.632466	3.02523	-1.59704	29.5.11.4.3.2 protein.degradation.ubiquitin.E3.SCF.FBOX	at1g51550	F-box family protein
260502_at	1.33807	-0.42015	1.70468	-0.769502	29.5.11.4.3.2 protein.degradation.ubiquitin.E3.SCF.FBOX	at1g47270	AtTLP6 (TUBBY LIKE PROTEIN 6); phosphoric diester hydrolase/ transcription factor
260588_at	1.47193	-0.557706	1.96494	-0.974483	29.5.11.4.3.2 protein.degradation.ubiquitin.E3.SCF.FBOX	at1g53320	AtTLP7 (TUBBY LIKE PROTEIN 7); phosphoric diester hydrolase/ transcription factor
260875_at	1.4793	-0.564917	3.03027	-1.59945	29.5.11.4.3.2 protein.degradation.ubiquitin.E3.SCF.FBOX	at1g21410	SKP2A
262500_at	1.39901	-0.484407	2.48466	-1.31305	29.5.11.4.3.2 protein.degradation.ubiquitin.E3.SCF.FBOX	at1g21760	FBP7 (F-BOX PROTEIN 7)
264957_at	2.19832	-1.1364	3.33574	-1.73801	29.5.11.4.3.2 protein.degradation.ubiquitin.E3.SCF.FBOX	at1g77000	SKP2B; ubiquitin-protein ligase
266235_at	2.28471	-1.19201	4.66121	-2.2207	29.5.11.4.3.2 protein.degradation.ubiquitin.E3.SCF.FBOX	at2g02360	AtPP2-B10 (Phloem protein 2-B10); carbohydrate binding
266426_x_at	1.441	-0.527071	2.35386	-1.23503	29.5.11.4.3.2 protein.degradation.ubiquitin.E3.SCF.FBOX	MULTIPLE HITS	ATARD1 (ACIREDUCTONE DIOXYGENASE 1); acireductone dioxygenase [iron(II)-requiring]/ metal
252587_at	1.98789	-0.991235	2.78947	-1.47999	29.5.11.4.99 protein.degradation.ubiquitin.E3.unspecified	at3g45620	transducin family protein / WD-40 repeat family protein
245391_at	1.9445	-0.959402	2.36419	-1.24135	29.5.2 protein.degradation.autophagy	at4g16520	ATG8F (autophagy 8f); microtubule binding
251393_at	1.73498	-0.794921	3.4105	-1.76998	29.5.2 protein.degradation.autophagy	at3g60640	ATG8G (AUTOPHAGY 8G); microtubule binding
251439_at	1.24682	-0.318258	1.48541	-0.570857	29.5.2 protein.degradation.autophagy	at3g59950	autophagy 4b (APG4b)
254346_at	1.92128	-0.942068	2.56256	-1.35759	29.5.2 protein.degradation.autophagy	at4g21980	APG8A (AUTOPHAGY 8A); APG8 activating enzyme/ APG8-specific protease/ Atg8 ligase
255283_at	1.81496	-0.859936	3.55936	-1.83162	29.5.2 protein.degradation.autophagy	at4g04620	ATG8B (autophagy 8b); microtubule binding
257293_at	1.91743	-0.939175	3.33942	-1.7396	29.5.2 protein.degradation.autophagy	at3g15580	APG8H (AUTOPHAGY 8H); APG8 activating enzyme/ APG8-specific protease/ Atg8 ligase/ microtubule binding
264285_at	1.60635	-0.683782	1.66553	-0.735985	29.5.2 protein.degradation.autophagy	at1g62040	ATG8C (autophagy 8c); microtubule binding
264828_at	1.68604	-0.753637	2.1344	-1.09383	29.5.2 protein.degradation.autophagy	at1g03380	AtATG18g
245096_at	1.74411	-0.802492	1.68454	-0.752356	29.5.3 protein.degradation.cysteine protease	at2g40880	ATCYSA (CYSTATIN A); cysteine-type endopeptidase inhibitor
245483_at	2.19298	-1.13289	4.83044	-2.27215	29.5.3 protein.degradation.cysteine protease	at4g16190	cysteine proteinase, putative
245803_at	1.97814	-0.984147	3.49153	-1.80386	29.5.3 protein.degradation.cysteine protease	at1g47128	RD21 (responsive to dehydration 21); cysteine-type endopeptidase/ cysteine-type peptidase
247627_at	1.85878	-0.894356	3.565	-1.8339	29.5.3 protein.degradation.cysteine protease	at5g60360	AALP (Arabidopsis aleurain-like protease); cysteine-type peptidase
250316_at	1.40657	-0.492182	1.74911	-0.806618	29.5.3 protein.degradation.cysteine protease	at5g12140	ATCYS1 (A. thaliana cystatin-1); cysteine-type endopeptidase inhibitor
250811_at	1.93251	-0.950473	4.64756	-2.21647	29.5.3 protein.degradation.cysteine protease	at5g05110	cysteine protease inhibitor, putative / cystatin, putative
252622_at	1.42571	-0.511679	1.80568	-0.852539	29.5.3 protein.degradation.cysteine protease	at3g45310	cysteine proteinase, putative
252927_at	2.26184	-1.1775	3.41449	-1.77167	29.5.3 protein.degradation.cysteine protease	at4g39090	RD19 (RESPONSIVE TO DEHYDRATION 19); cysteine-type endopeptidase/ cysteine-type peptidase
255590_at	2.05031	-1.03584	5.29227	-2.40389	29.5.3 protein.degradation.cysteine protease	at4g01610	cathepsin B-like cysteine protease, putative
258855_at	1.42749	-0.513485	1.78369	-0.834863	29.5.3 protein.degradation.cysteine protease	at3g02070	OTU-like cysteine protease family protein
259416_at	1.5238	-0.607674	2.52377	-1.33558	29.5.3 protein.degradation.cysteine protease	at1g02305	cathepsin B-like cysteine protease, putative
259441_at	2.20889	-1.14332	3.96101	-1.98587	29.5.3 protein.degradation.cysteine protease	at1g02300	cathepsin B-like cysteine protease, putative
247624_at	1.37236	-0.456662	2.00713	-1.00513	29.5.4 protein.degradation.aspartate protease	at5g60160	aspartyl aminopeptidase, putative
252098_at	2.3805	-1.25126	2.01606	-1.01154	29.5.4 protein.degradation.aspartate protease	at3g51330	aspartyl protease family protein
260772_at	1.81978	-0.863767	2.30369	-1.20395	29.5.4 protein.degradation.aspartate protease	at1g49050	aspartyl protease family protein
248255_at	1.73261	-0.792948	3.61478	-1.85391	29.5.5 protein.degradation.serine protease	at5g53350	CLPX; ATP binding / ATPase/ nucleoside-triphosphatase/ nucleotide binding / protein binding
249510_at	1.27847	-0.354422	1.37732	-0.461865	29.5.5 protein.degradation.serine protease	at5g38510	rhomboid family protein
250621_at	1.28402	-0.360662	2.25143	-1.17084	29.5.5 protein.degradation.serine protease	at5g07250	ATRBL3 (ARABIDOPSIS RHOMBOID-LIKE PROTEIN 3)
251930_at	1.37445	-0.458859	2.02554	-1.01831	29.5.5 protein.degradation.serine protease	at3g53780	rhomboid family protein
255842_at	1.2593	-0.332623	1.19631	-0.258597	29.5.5 protein.degradation.serine protease	at2g33530	scpl46 (serine carboxypeptidase-like 46); serine-type carboxypeptidase
257222_at	1.33684	-0.418823	1.8857	-0.915101	29.5.5 protein.degradation.serine protease	at3g27925	DEGP1 (DegP protease 1); serine-type endopeptidase/ serine-type peptidase
267265_at	1.62125	-0.697108	0.463463	1.10947	29.5.5 protein.degradation.serine protease	at2g22980	serine-type carboxypeptidase
257646_at	1.70503	-0.769795	1.90606	-0.930594	29.5.7 protein.degradation.metalloprotease	at3g25740	MAP1B (METHIONINE AMINOPEPTIDASE 1C); aminopeptidase/ metalloexopeptidase
267189_at	1.96512	-0.974614	2.25743	-1.17468	29.5.7 protein.degradation.metalloprotease	at2g44180	MAP2A (METHIONINE AMINOPEPTIDASE 2A); aminopeptidase/ metalloexopeptidase
250062_at	2.13561	-1.09465	3.20188	-1.67892	29.5.9 protein.degradation.AAA type	at5g17760	AAA-type ATPase family protein
256596_at	2.38383	-1.25328	2.73889	-1.45359	29.5.9 protein.degradation.AAA type	at3g28540	AAA-type ATPase family protein
259507_at	2.7415	-1.45496	6.83998	-2.77399	29.5.9 protein.degradation.AAA type	at1g43910	AAA-type ATPase family protein
265450_at	1.71198	-0.775669	2.69181	-1.42858	29.5.9 protein.degradation.AAA type	at2g46620	AAA-type ATPase family protein
267499_at	1.5586	-0.640252	2.0648	-1.046	29.5.9 protein.degradation.AAA type	at2g45500	ATP binding / nucleoside-triphosphatase/ nucleotide binding
247281_at	1.51549	-0.599786	1.80082	-0.848658	29.6 protein.folding	at5g64350	FKBP12 (FK506-BINDING PROTEIN); FK506 binding / peptidyl-prolyl cis-trans isomerase
266090_at	1.3735	-0.457857	1.75098	-0.808159	29.6 protein.folding	at2g38000	chaperone protein dnaJ-related
261612_at	1.41036	-0.496063	1.64795	-0.720674	29.7.10 protein.glycosylation.alpha-1,3-fucosyltransferase(alpha-1,3-FucT)	at1g49710	FUT12 (FUCOSYLTRANSFERASE 12); fucosyltransferase/ transferase, transferring glycosyl groups
263105_at	1.48723	-0.572626	1.78099	-0.832676	29.7.8 protein.glycosylation.alpha-1,6-mannosyl-glycoprotein-beta-1,2-N-acetylglucosaminyltransferase(GnTII)	at2g05320	beta-1,2-N-acetylglucosaminyltransferase II
250073_at	1.29339	-0.371156	1.24503	-0.316175	29.8 protein.assembly and cofactor ligation	at5g17170	ENH1 (enhancer of sos3-1); electron carrier/ metal ion binding / protein binding
262860_at	1.46737	-0.553228	3.66265	-1.87289	29.8 protein.assembly and cofactor ligation	at1g64810	APO1 (ACCUMULATION OF PHOTOSYSTEM ONE 1)
260059_at	1.72399	-0.78575	0.773783	0.369999	3.2.2 minor CHO metabolism.trehalose.TPP	at1g78090	ATTPPB (TREHALOSE-6-PHOSPHATE PHOSPHATASE); trehalose-phosphatase
264246_at	1.86868	-0.902021	2.43411	-1.28339	3.2.3 minor CHO metabolism.trehalose.potential TPS/TPP	at1g60140	ATTPS10 (trehalose phosphate synthase); transferase, transferring glycosyl groups / trehalose-phosphatase
254197_at	1.46273	-0.548663	2.00177	-1.00128	3.2.4 minor CHO metabolism.trehalose.trehalase	at4g24040	TRE1 (TREHALASE 1); alpha,alpha-trehalase/ trehalase
248398_at	1.64975	-0.722244	1.68976	-0.756819	3.3 minor CHO metabolism.sugar alcohols	at5g51970	sorbitol dehydrogenase, putative / L-iditol 2-dehydrogenase, putative
254707_at	1.5002	-0.585153	2.06446	-1.04576	3.4.1 minor CHO metabolism.myo-inositol.poly-phosphatases	at4g18010	AT5PTASE2 (MYO-INOSITOL POLYPHOSPHATE 5-PHOSPHATASE 2); inositol-polyphosphate 5-phosphatase
255984_at	1.6019	-0.679781	1.60369	-0.681393	3.4.1 minor CHO metabolism.myo-inositol.poly-phosphatases	at1g34120	IP5PI (INOSITOL POLYPHOSPHATE 5-PHOSPHATASE I); inositol trisphosphate phosphatase/ inositol-polyphosphate 5-ph
250471_at	1.64617	-0.719112	1.77571	-0.828398	3.4.3 minor CHO metabolism.myo-inositol.InsP Synthases	at5g10170	MIPS3 (MYO-INOSITOL-1-PHOSTPATE SYNTHASE 3); binding / catalytic/ inositol-3-phosphate synthase
263433_at	1.56183	-0.643236	5.41916	-2.43807	3.4.3 minor CHO metabolism.myo-inositol.InsP Synthases	at2g22240	MIPS2 (MYO-INOSITOL-1-PHOSTPATE SYNTHASE 2); binding / catalytic/ inositol-3-phosphate synthase
247788_at	1.28794	-0.36507	1.78096	-0.832655	3.5 minor CHO metabolism.others	at5g58730	pfkB-type carbohydrate kinase family protein
250186_at	1.53166	-0.615095	2.38246	-1.25245	3.5 minor CHO metabolism.others	at5g14500	aldose 1-epimerase family protein
250302_at	3.18144	-1.66968	5.60573	-2.4869	3.5 minor CHO metabolism.others	at5g11920	AtcwINV6 (6-&1-fructan exohydrolase); hydrolase, hydrolyzing O-glycosyl compounds / inulinase/ levanase
261294_at	1.64234	-0.715757	3.52329	-1.81692	3.5 minor CHO metabolism.others	at1g48430	dihydroxyacetone kinase family protein
262519_at	1.34849	-0.431342	1.9817	-0.986739	3.5 minor CHO metabolism.others	at1g17160	pfkB-type carbohydrate kinase family protein
263758_s_at	1.47687	-0.562544	2.03513	-1.02512	3.5 minor CHO metabolism.others	MULTIPLE HITS	ATARD1 (ACIREDUCTONE DIOXYGENASE 1); acireductone dioxygenase [iron(II)-requiring]/ metal
267168_at	3.00998	-1.58976	18.3969	-4.20139	3.5 minor CHO metabolism.others	at2g37770	aldo/keto reductase family protein
267181_at	3.5934	-1.84535	11.2453	-3.49125	3.5 minor CHO metabolism.others	at2g37760	aldo/keto reductase family protein
263183_at	3.08919	-1.62723	3.9035	-1.96477	3.6 minor CHO metabolism.callose	at1g05570	CALS1 (CALLOSE SYNTHASE 1); 1,3-beta-glucan synthase/ transferase, transferring glycosyl groups
248591_at	1.24609	-0.31741	1.37016	-0.45434	3.7 minor CHO metabolism.sugar kinases	at5g49650	xylulose kinase, putative
251729_at	1.46065	-0.54661	2.32879	-1.21958	3.8.2 minor CHO metabolism.galactose.alpha-galactosidases	at3g56310	alpha-galactosidase, putative / melibiase, putative / alpha-D-galactoside galactohydrolase, putative
249425_at	1.42249	-0.508416	2.45012	-1.29285	30.1 signalling.in sugar and nutrient physiology	at5g39790	5'-AMP-activated protein kinase beta-1 subunit-related
258566_at	2.04319	-1.03082	2.92538	-1.54862	30.1 signalling.in sugar and nutrient physiology	at3g04110	GLR1.1 (GLUTAMATE RECEPTOR 1.1); cation channel/ intracellular ligand-gated ion channel
266337_at	1.42155	-0.507463	1.89861	-0.924941	30.1 signalling.in sugar and nutrient physiology	at2g32390	ATGLR3.5 (GLUTAMATE RECEPTOR 3.5); intracellular ligand-gated ion channel
266782_at	2.50453	-1.32454	2.92295	-1.54742	30.1 signalling.in sugar and nutrient physiology	at2g29120	ATGLR2.7; intracellular ligand-gated ion channel
245306_at	2.48851	-1.31528	17.8373	-4.15682	30.11 signalling.light	at4g14690	ELIP2 (EARLY LIGHT-INDUCIBLE PROTEIN 2); chlorophyll binding
248689_at	1.33018	-0.41162	1.93622	-0.953245	30.11 signalling.light	at5g48150	PAT1 (phytochrome a signal transduction 1); signal transducer/ transcription factor
257832_at	2.93237	-1.55207	4.80694	-2.26512	30.11 signalling.light	at3g26740	CCL (CCR-LIKE)
258321_at	4.13665	-2.04846	46.9075	-5.55175	30.11 signalling.light	at3g22840	ELIP1 (EARLY LIGHT-INDUCABLE PROTEIN); chlorophyll binding
263669_at	1.33836	-0.420467	1.47846	-0.564097	30.11 signalling.light	at1g04400	CRY2 (CRYPTOCHROME 2); blue light photoreceptor/ protein homodimerization
264999_at	1.40977	-0.495459	2.0844	-1.05963	30.11 signalling.light	at1g67310	calmodulin binding / transcription regulator
267477_at	1.83787	-0.878031	2.33659	-1.2244	30.11 signalling.light	at2g02710	PLPB (PAS/LOV PROTEIN B); signal transducer/ two-component sensor
247685_at	2.38271	-1.2526	3.11351	-1.63854	30.2.1 signalling.receptor kinases.leucine rich repeat I	at5g59680	leucine-rich repeat protein kinase, putative
248698_at	2.00694	-1.005	2.12218	-1.08555	30.2.10 signalling.receptor kinases.leucine rich repeat X	at5g48380	leucine-rich repeat family protein / protein kinase family protein
249221_at	1.32381	-0.404701	1.4312	-0.517224	30.2.10 signalling.receptor kinases.leucine rich repeat X	at5g42440	protein kinase family protein
257902_at	1.41059	-0.4963	1.66169	-0.732651	30.2.10 signalling.receptor kinases.leucine rich repeat X	at3g28450	leucine-rich repeat transmembrane protein kinase, putative
261161_at	1.51659	-0.600828	1.98636	-0.990129	30.2.10 signalling.receptor kinases.leucine rich repeat X	at1g34420	leucine-rich repeat family protein / protein kinase family protein
248590_at	1.38652	-0.471472	1.84732	-0.885432	30.2.11 signalling.receptor kinases.leucine rich repeat XI	at5g49660	leucine-rich repeat transmembrane protein kinase, putative
253779_at	1.8729	-0.90527	4.46354	-2.15819	30.2.11 signalling.receptor kinases.leucine rich repeat XI	at4g28490	HAE (HAESA); ATP binding / kinase/ protein kinase/ protein serine/threonine kinase
263478_at	2.55671	-1.35429	2.88043	-1.52628	30.2.11 signalling.receptor kinases.leucine rich repeat XI	at2g31880	leucine-rich repeat transmembrane protein kinase, putative
247686_at	1.39121	-0.476345	3.04675	-1.60727	30.2.16 signalling.receptor kinases.Catharanthus roseus-like RLK1	at5g59700	protein kinase, putative
249486_at	2.14984	-1.10423	2.62779	-1.39385	30.2.16 signalling.receptor kinases.Catharanthus roseus-like RLK1	at5g39030	protein kinase family protein
252549_at	3.94048	-1.97837	3.53389	-1.82126	30.2.17 signalling.receptor kinases.DUF 26	at3g45860	receptor-like protein kinase, putative
254248_at	1.99057	-0.993181	2.08612	-1.06082	30.2.17 signalling.receptor kinases.DUF 26	at4g23270	protein kinase family protein
254252_at	1.46695	-0.552819	1.32774	-0.408968	30.2.17 signalling.receptor kinases.DUF 26	at4g23310	receptor-like protein kinase, putative
254253_at	1.71269	-0.776261	2.24069	-1.16395	30.2.17 signalling.receptor kinases.DUF 26	at4g23320	protein kinase family protein
254256_at	1.91082	-0.934195	1.72152	-0.783681	30.2.17 signalling.receptor kinases.DUF 26	at4g23180	CRK10 (CYSTEINE-RICH RLK10); ATP binding / kinase/ protein kinase/ protein serine/threonine kinase/ protein tyrosine kina
254265_s_at	3.22698	-1.69018	2.60617	-1.38193	30.2.17 signalling.receptor kinases.DUF 26	MULTIPLE HITS	ATARD1 (ACIREDUCTONE DIOXYGENASE 1); acireductone dioxygenase [iron(II)-requiring]/ metal
254266_at	2.42177	-1.27606	1.97252	-0.980043	30.2.17 signalling.receptor kinases.DUF 26	at4g23130	CRK5 (CYSTEINE-RICH RLK5); kinase
255502_at	1.69367	-0.760151	2.41437	-1.27165	30.2.19 signalling.receptor kinases.legume-lectin	at4g02410	lectin protein kinase family protein
258982_at	2.2853	-1.19238	4.5795	-2.19519	30.2.19 signalling.receptor kinases.legume-lectin	at3g08870	lectin protein kinase, putative
264107_s_at	1.61499	-0.691524	2.01052	-1.00757	30.2.2 signalling.receptor kinases.leucine rich repeat II	MULTIPLE HITS	ATARD1 (ACIREDUCTONE DIOXYGENASE 1); acireductone dioxygenase [iron(II)-requiring]/ metal
245760_s_at	1.75471	-0.81123	1.85048	-0.887901	30.2.20 signalling.receptor kinases.wheat LRK10 like	MULTIPLE HITS	ATARD1 (ACIREDUCTONE DIOXYGENASE 1); acireductone dioxygenase [iron(II)-requiring]/ metal
249550_at	1.7122	-0.775853	1.5629	-0.644223	30.2.20 signalling.receptor kinases.wheat LRK10 like	at5g38210	serine/threonine protein kinase family protein
256366_at	2.12772	-1.08931	2.10771	-1.07568	30.2.20 signalling.receptor kinases.wheat LRK10 like	at1g66880	serine/threonine protein kinase family protein
258173_at	1.67963	-0.748147	1.87167	-0.904323	30.2.21 signalling.receptor kinases.lysine motif	at3g21630	CERK1 (CHITIN ELICITOR RECEPTOR KINASE 1); kinase/ receptor signaling protein/ transmembrane receptor protein kinase
260477_at	1.28666	-0.363626	2.08764	-1.06187	30.2.23 signalling.receptor kinases.RKF3 like	at1g11050	protein kinase family protein
253911_at	2.07805	-1.05523	3.48106	-1.79952	30.2.24 signalling.receptor kinases.S-locus glycoprotein like	at4g27300	S-locus protein kinase, putative
254416_at	3.55811	-1.83111	2.63809	-1.3995	30.2.24 signalling.receptor kinases.S-locus glycoprotein like	at4g21380	ARK3 (A. THALIANA RECEPTOR KINASE 3); kinase/ transmembrane receptor protein serine/threonine kinase
262926_s_at	2.59587	-1.37622	2.81874	-1.49505	30.2.24 signalling.receptor kinases.S-locus glycoprotein like	MULTIPLE HITS	ATARD1 (ACIREDUCTONE DIOXYGENASE 1); acireductone dioxygenase [iron(II)-requiring]/ metal
259561_at	3.10363	-1.63396	3.80422	-1.9276	30.2.25 signalling.receptor kinases.wall associated kinase	at1g21250	WAK1 (CELL WALL-ASSOCIATED KINASE); kinase
260419_at	1.6411	-0.714667	1.98761	-0.991034	30.2.25 signalling.receptor kinases.wall associated kinase	at1g69730	protein kinase family protein
262705_at	2.2275	-1.15543	2.04797	-1.0342	30.2.25 signalling.receptor kinases.wall associated kinase	at1g16260	protein kinase family protein
267134_at	1.43438	-0.520424	1.50795	-0.592593	30.2.25 signalling.receptor kinases.wall associated kinase	at2g23450	protein kinase family protein
248916_at	2.41033	-1.26923	2.85607	-1.51403	30.2.6 signalling.receptor kinases.leucine rich repeat VI	at5g45840	leucine-rich repeat transmembrane protein kinase, putative
248908_at	1.53462	-0.61788	2.72798	-1.44783	30.2.7 signalling.receptor kinases.leucine rich repeat VII	at5g45800	MEE62 (maternal effect embryo arrest 62); ATP binding / protein binding / protein kinase/ protein serine/threonine kinase/ prot
246327_at	1.67534	-0.744456	1.58607	-0.665452	30.2.8.2 signalling.receptor kinases.leucine rich repeat VIII.VIII-2	at1g16670	protein kinase family protein
245201_at	1.28591	-0.362784	1.62871	-0.703725	30.2.99 signalling.receptor kinases.misc	at1g67840	CSK (CHLOROPLAST SENSOR KINASE); ATP binding / kinase
249473_at	1.51703	-0.601253	1.75506	-0.811521	30.2.99 signalling.receptor kinases.misc	at5g39340	AHP3 (HISTIDINE-CONTAINING PHOSPHOTRANSMITTER 3); histidine phosphotransfer kinase
260345_at	1.64394	-0.717154	2.37943	-1.25062	30.2.99 signalling.receptor kinases.misc	at1g69270	RPK1 (RECEPTOR-LIKE PROTEIN KINASE 1); kinase/ protein binding / receptor signaling protein serine/threonine kinase
264838_at	1.90006	-0.926048	3.22624	-1.68985	30.2.99 signalling.receptor kinases.misc	at1g03430	AHP5 (HISTIDINE-CONTAINING PHOSPHOTRANSFER FACTOR 5); histidine phosphotransfer kinase
245732_at	1.38533	-0.470234	1.7735	-0.826601	30.3 signalling.calcium	at1g73440	calmodulin-related
248001_at	1.46126	-0.547214	1.4533	-0.539334	30.3 signalling.calcium	at5g55990	CBL2 (CALCINEURIN B-LIKE 2); calcium ion binding
249582_at	1.37301	-0.457343	2.20055	-1.13787	30.3 signalling.calcium	at5g37780	CAM1 (CALMODULIN 1); calcium ion binding
252417_at	2.56866	-1.36102	2.36152	-1.23971	30.3 signalling.calcium	at3g47480	calcium-binding EF hand family protein
252915_at	1.53354	-0.616865	1.81215	-0.857703	30.3 signalling.calcium	at4g38810	calcium-binding EF hand family protein
253457_at	1.38221	-0.466979	1.40198	-0.487465	30.3 signalling.calcium	at4g32060	calcium-binding EF hand family protein
253702_at	1.43331	-0.519353	1.93624	-0.953256	30.3 signalling.calcium	at4g29900	ACA10 (AUTOINHIBITED CA(2+)-ATPASE 10); calcium-transporting ATPase/ calmodulin binding
255795_at	2.09518	-1.06707	6.88694	-2.78386	30.3 signalling.calcium	at2g33380	RD20 (RESPONSIVE TO DESSICATION 20); calcium ion binding
261692_at	2.15373	-1.10684	2.47259	-1.30602	30.3 signalling.calcium	at1g08450	CRT3 (CALRETICULIN 3); calcium ion binding / unfolded protein binding
262639_at	1.42233	-0.508259	1.78092	-0.832623	30.3 signalling.calcium	at1g62820	calmodulin, putative
262877_at	1.50018	-0.585134	1.94158	-0.957232	30.3 signalling.calcium	at1g64850	calcium-binding EF hand family protein
263296_at	1.66329	-0.73404	3.31826	-1.73043	30.3 signalling.calcium	at2g38800	calmodulin-binding protein-related
264123_at	1.66587	-0.736274	2.72008	-1.44365	30.3 signalling.calcium	at1g02270	endonuclease/exonuclease/phosphatase family protein / calcium-binding EF hand family protein
265116_at	1.83743	-0.877688	1.68469	-0.752485	30.3 signalling.calcium	at1g62480	vacuolar calcium-binding protein-related
265460_at	2.39657	-1.26097	4.13672	-2.04849	30.3 signalling.calcium	at2g46600	calcium-binding protein, putative
262003_at	1.25473	-0.327375	1.39416	-0.479399	30.4 signalling.phosphinositides	at1g64460	phosphatidylinositol 3- and 4-kinase family protein
262540_at	1.48328	-0.568794	1.68145	-0.749707	30.4.1 signalling.phosphinositides.phosphatidylinositol-4-phosphate 5-kinase	at1g34260	phosphatidylinositol-4-phosphate 5-kinase family protein
247794_at	2.05075	-1.03615	2.19907	-1.13689	30.4.4 signalling.phosphinositides.phosphoinositide phospholipase C	at5g58670	PLC1 (PHOSPHOLIPASE C 1); phospholipase C
247545_at	1.5441	-0.626765	2.52006	-1.33346	30.5 signalling.G-proteins	at5g61530	small G protein family protein / RhoGAP family protein
248983_at	1.35372	-0.436931	2.2399	-1.16343	30.5 signalling.G-proteins	at5g45130	RHA1 (RAB HOMOLOG 1); GTP binding
250901_at	1.5589	-0.640527	1.51615	-0.600412	30.5 signalling.G-proteins	at5g03530	RABC2A (RAB GTPASE HOMOLOG C2A); GTP binding / GTP-dependent protein binding / myosin
251121_at	1.39097	-0.476093	1.7362	-0.795929	30.5 signalling.G-proteins	at3g63420	AGG1 (Arabidopsis Ggamma-subunit 1); GTP binding
251217_at	1.37763	-0.462188	1.90951	-0.933205	30.5 signalling.G-proteins	at3g62560	GTP-binding protein, putative
251817_at	1.35959	-0.443174	2.08979	-1.06336	30.5 signalling.G-proteins	at3g54840	ARA6; GTP binding / GTPase
253163_at	1.58984	-0.668884	2.77857	-1.47434	30.5 signalling.G-proteins	at4g35750	Rho-GTPase-activating protein-related
253204_at	1.24527	-0.316462	1.79924	-0.847389	30.5 signalling.G-proteins	at4g34460	AGB1 (GTP BINDING PROTEIN BETA 1); GTPase/ nucleotide binding / protein binding
253225_at	1.33965	-0.421859	1.68706	-0.754511	30.5 signalling.G-proteins	at4g35020	ARAC3 (ARABIDOPSIS RAC-LIKE 3); GTP binding / GTPase
254530_at	1.44843	-0.534493	2.9308	-1.55129	30.5 signalling.G-proteins	at4g19640	ARA7; GTP binding
254641_at	1.50311	-0.587951	1.49274	-0.577963	30.5 signalling.G-proteins	at4g18800	ATRABA1D (ARABIDOPSIS RAB GTPASE HOMOLOG A1D); GTP binding
259395_at	1.37382	-0.458194	2.19192	-1.13219	30.5 signalling.G-proteins	at1g06400	ARA-2; GTP binding
262401_at	1.52385	-0.60772	2.11991	-1.084	30.5 signalling.G-proteins	at1g49300	RABG3E (RAB GTPASE HOMOLOG G3E); GTP binding
264252_at	1.4026	-0.488109	2.24017	-1.16361	30.5 signalling.G-proteins	at1g09180	ATSARA1A (ARABIDOPSIS THALIANA SECRETION-ASSOCIATED RAS SUPER FAMILY 1); GTP binding
253993_at	1.59027	-0.669272	1.56891	-0.649762	30.6 signalling.MAP kinases	at4g26070	MEK1 (MAP KINASE/ ERK KINASE 1); MAP kinase kinase/ kinase/ protein binding
256183_at	1.41477	-0.500572	1.85846	-0.894109	30.6 signalling.MAP kinases	at1g51660	ATMKK4 (ARABIDOPSIS THALIANA MITOGEN-ACTIVATED PROTEIN KINASE KINASE 4); MAP kinase kinase/ kinase
262076_at	1.55674	-0.638533	2.31444	-1.21067	30.6 signalling.MAP kinases	at1g59580	ATMPK2 (ARABIDOPSIS THALIANA MITOGEN-ACTIVATED PROTEIN KINASE HOMOLOG 2); MAP kinase/ kinase/ protein kinase
264405_at	1.54539	-0.627969	2.25583	-1.17366	30.6 signalling.MAP kinases	at1g10210	ATMPK1 (MITOGEN-ACTIVATED PROTEIN KINASE 1); MAP kinase/ kinase
263494_at	1.27109	-0.346064	1.23199	-0.300991	30.7 signalling.14-3-3 proteins	at2g42590	GRF9 (GENERAL REGULATORY FACTOR 9); calcium ion binding / protein binding / protein phosphorylated amino acid binding
245525_at	1.39273	-0.47792	1.84118	-0.880632	31.1 cell.organisation	at4g15930	microtubule motor
246144_at	1.63298	-0.707504	1.71559	-0.778704	31.1 cell.organisation	at5g20110	dynein light chain, putative
246759_at	1.58561	-0.665038	1.82705	-0.869513	31.1 cell.organisation	at5g27950	kinesin motor protein-related
247656_at	1.58435	-0.663891	1.62206	-0.697824	31.1 cell.organisation	at5g59890	ADF4 (ACTIN DEPOLYMERIZING FACTOR 4); actin binding
247997_at	1.38891	-0.473953	1.74519	-0.803386	31.1 cell.organisation	at5g56180	ATARP8 (ACTIN-RELATED PROTEIN 8); structural constituent of cytoskeleton
248169_at	3.63841	-1.86331	4.44224	-2.15129	31.1 cell.organisation	at5g54610	ANK (ankyrin); protein binding
248395_at	1.37603	-0.460517	2.14641	-1.10193	31.1 cell.organisation	at5g52120	AtPP2-A14 (Phloem protein 2-A14); carbohydrate binding
250548_at	1.38866	-0.473691	1.31915	-0.399613	31.1 cell.organisation	at5g08120	MBP2C (MICROTUBULE BINDING PROTEIN 2C); protein binding
250998_at	1.66484	-0.735382	2.45045	-1.29305	31.1 cell.organisation	at5g02620	ankyrin repeat family protein
252411_at	1.32067	-0.401274	1.7859	-0.836653	31.1 cell.organisation	at3g47430	PEX11B
252564_at	1.26321	-0.337095	1.57269	-0.653236	31.1 cell.organisation	at3g46010	ADF1 (ACTIN DEPOLYMERIZING FACTOR 1); actin binding
253727_at	1.24754	-0.319082	1.59548	-0.673992	31.1 cell.organisation	at4g29350	PFN2 (PROFILIN 2); actin binding / protein binding
255364_s_at	1.67635	-0.745322	4.70558	-2.23437	31.1 cell.organisation	MULTIPLE HITS	ATARD1 (ACIREDUCTONE DIOXYGENASE 1); acireductone dioxygenase [iron(II)-requiring]/ metal
255377_at	2.23925	-1.16302	2.50558	-1.32514	31.1 cell.organisation	at4g03500	ankyrin repeat family protein
255539_at	1.39806	-0.483428	1.57495	-0.655308	31.1 cell.organisation	at4g01710	CRK (CROOKED); actin binding
255710_at	1.28207	-0.35848	1.52008	-0.604147	31.1 cell.organisation	at4g00030	plastid-lipid associated protein PAP / fibrillin family protein
256233_at	1.44633	-0.532393	2.13106	-1.09157	31.1 cell.organisation	at3g12360	ITN1 (INCREASED TOLERANCE TO NACL); protein binding
258071_s_at	1.30925	-0.388738	1.31342	-0.393334	31.1 cell.organisation	MULTIPLE HITS	ATARD1 (ACIREDUCTONE DIOXYGENASE 1); acireductone dioxygenase [iron(II)-requiring]/ metal
258295_at	1.37888	-0.463495	1.65494	-0.726783	31.1 cell.organisation	at3g23400	plastid-lipid associated protein PAP / fibrillin family protein
259685_at	2.31636	-1.21186	2.38294	-1.25274	31.1 cell.organisation	at1g63090	AtPP2-A11 (Phloem protein 2-A11); carbohydrate binding
260813_at	1.33248	-0.414109	1.9821	-0.987027	31.1 cell.organisation	at1g43700	VIP1 (VIRE2-INTERACTING PROTEIN 1); protein binding / transcription factor
264434_at	2.08773	-1.06194	1.70647	-0.771016	31.1 cell.organisation	at1g10340	ankyrin repeat family protein
265059_at	1.58258	-0.662277	2.97228	-1.57157	31.1 cell.organisation	at1g52080	AR791; actin binding
266229_at	1.84177	-0.881091	2.89057	-1.53135	31.1 cell.organisation	at2g28840	ankyrin repeat family protein
267401_at	1.31491	-0.39496	1.59323	-0.671954	31.1 cell.organisation	at2g26210	ankyrin repeat family protein
251659_at	1.30967	-0.389198	2.39228	-1.25839	31.2 cell.division	at3g57090	BIGYIN; binding
251975_at	2.18633	-1.12851	9.02154	-3.17337	31.2 cell.division	at3g53230	cell division cycle protein 48, putative / CDC48, putative
258085_at	1.33079	-0.412282	2.27414	-1.18532	31.2 cell.division	at3g26100	regulator of chromosome condensation (RCC1) family protein
258401_at	1.32462	-0.40558	1.96284	-0.972941	31.2 cell.division	at3g15430	regulator of chromosome condensation (RCC1) family protein
260356_at	1.26084	-0.334382	1.66744	-0.737634	31.2.5 cell.division.plastid	at1g69390	ATMINE1 (Arabidopsis homologue of bacterial MinE 1); protein binding
248657_at	2.12175	-1.08526	11.5632	-3.53147	31.3.1 cell.cycle.peptidylprolyl isomerase	at5g48570	peptidyl-prolyl cis-trans isomerase, putative / FK506-binding protein, putative
251932_at	1.39622	-0.481526	2.10142	-1.07136	31.3.1 cell.cycle.peptidylprolyl isomerase	at3g54010	PAS1 (PASTICCINO 1); FK506 binding / binding / peptidyl-prolyl cis-trans isomerase
252973_s_at	1.3972	-0.482541	2.22522	-1.15395	31.3.1 cell.cycle.peptidylprolyl isomerase	at4g38740	ROC1 (ROTAMASE CYP 1); peptidyl-prolyl cis-trans isomerase
260530_at	1.3023	-0.381062	1.38492	-0.469804	31.3.1 cell.cycle.peptidylprolyl isomerase	at2g47320	peptidyl-prolyl cis-trans isomerase cyclophilin-type family protein
261018_at	1.30843	-0.387834	1.97514	-0.981954	31.3.1 cell.cycle.peptidylprolyl isomerase	at1g26550	peptidyl-prolyl cis-trans isomerase PPIC-type family protein
265352_at	1.60551	-0.683028	1.595	-0.673559	31.3.1 cell.cycle.peptidylprolyl isomerase	at2g16600	ROC3; peptidyl-prolyl cis-trans isomerase
245678_at	1.65596	-0.727667	2.40352	-1.26515	31.4 cell.vesicle transport	at1g56610	syntaxin-related family protein
246421_at	1.41802	-0.503877	1.73162	-0.792122	31.4 cell.vesicle transport	at5g16880	VHS domain-containing protein / GAT domain-containing protein
247571_at	1.64207	-0.715517	2.04932	-1.03514	31.4 cell.vesicle transport	at5g61210	SNAP33 (SOLUBLE N-ETHYLMALEIMIDE-SENSITIVE FACTOR ADAPTOR PROTEIN 33); SNAP receptor/ protein bind
249453_at	1.24518	-0.316358	1.83545	-0.876136	31.4 cell.vesicle transport	at5g39510	SGR4 (SHOOT GRAVITROPSIM 4); receptor
250740_at	1.34214	-0.424534	2.45892	-1.29802	31.4 cell.vesicle transport	at5g05760	SYP31 (SYNTAXIN OF PLANTS 31); SNAP receptor
253462_at	1.40307	-0.488583	2.25105	-1.1706	31.4 cell.vesicle transport	at4g32150	ATVAMP711 (ARABIDOPSIS THALIANA VESICLE-ASSOCIATED MEMBRANE PROTEIN 711)
254891_at	1.48513	-0.570588	1.84399	-0.882833	31.4 cell.vesicle transport	at4g11740	SAY1
258345_at	1.36533	-0.44925	1.70978	-0.773808	31.4 cell.vesicle transport	at3g22845	emp24/gp25L/p24 protein-related
261276_at	1.93308	-0.9509	2.90866	-1.54035	31.4 cell.vesicle transport	at1g26670	VTI1B; SNARE binding / receptor/ soluble NSF attachment protein
264951_at	1.52553	-0.60931	2.04063	-1.02901	31.4 cell.vesicle transport	at1g76970	VHS domain-containing protein / GAT domain-containing protein
267428_at	1.46283	-0.548767	2.04453	-1.03177	31.4 cell.vesicle transport	at2g34840	coatomer protein epsilon subunit family protein / COPE family protein
246335_at	1.53514	-0.61837	3.00438	-1.58707	31.5.1 cell.cell death.plants	at3g44880	ACD1 (ACCELERATED CELL DEATH 1); iron-sulfur cluster binding / pheophorbide a oxygenase
267340_at	1.2888	-0.366027	1.83408	-0.87506	31.5.1 cell.cell death.plants	at2g34690	ACD11 (ACCELERATED CELL DEATH 11); sphingosine transmembrane transporter
256534_at	1.33474	-0.416563	2.21229	-1.14554	33.1 development.storage proteins	at1g33270	patatin-related
259426_at	1.60574	-0.683239	2.58518	-1.37027	33.2 development.late embryogenesis abundant	at1g01470	LEA14 (LATE EMBRYOGENESIS ABUNDANT 14)
261375_at	2.49623	-1.31975	7.4413	-2.89555	33.3 development.squamosa promoter binding like (SPL)	at1g53160	SPL4 (SQUAMOSA PROMOTER BINDING PROTEIN-LIKE 4); DNA binding / transcription factor
267460_at	2.66827	-1.41591	4.59423	-2.19982	33.3 development.squamosa promoter binding like (SPL)	at2g33810	SPL3 (SQUAMOSA PROMOTER BINDING PROTEIN-LIKE 3); DNA binding / transcription factor
245401_at	1.89473	-0.921991	6.47712	-2.69535	33.99 development.unspecified	at4g17670	senescence-associated protein-related
245993_at	1.6738	-0.743124	2.10526	-1.074	33.99 development.unspecified	at5g20700	senescence-associated protein-related
246006_at	1.26055	-0.33405	1.64463	-0.717761	33.99 development.unspecified	at5g08290	YLS8; catalytic
246515_at	1.30615	-0.385323	1.38722	-0.472201	33.99 development.unspecified	at5g15710	F-box family protein
247109_at	2.25677	-1.17426	3.26102	-1.70532	33.99 development.unspecified	at5g65870	ATPSK5 (PHYTOSULFOKINE 5 PRECURSOR); growth factor
247553_at	1.59305	-0.671793	3.57725	-1.83885	33.99 development.unspecified	at5g60910	AGL8 (agamous-like 8); transcription factor
248000_at	1.44102	-0.52709	1.88345	-0.913375	33.99 development.unspecified	at5g56190	WD-40 repeat family protein
248366_at	1.3424	-0.424811	2.08221	-1.05812	33.99 development.unspecified	at5g52510	scarecrow-like transcription factor 8 (SCL8)
248531_at	1.26714	-0.341575	2.00688	-1.00495	33.99 development.unspecified	at5g49950	embryogenesis-associated protein-related
248820_at	1.821	-0.864731	3.9796	-1.99262	33.99 development.unspecified	at5g47060	senescence-associated protein-related
249467_at	1.8476	-0.885649	3.07209	-1.61922	33.99 development.unspecified	at5g39610	ATNAC6 (ARABIDOPSIS NAC DOMAIN CONTAINING PROTEIN 6); protein heterodimerization/ protein homodimerizat
250372_at	1.73517	-0.79508	2.25985	-1.17623	33.99 development.unspecified	at5g11460	senescence-associated protein-related
250449_at	1.43472	-0.520766	1.81488	-0.859874	33.99 development.unspecified	at5g10830	embryo-abundant protein-related
252591_at	1.51545	-0.599743	2.00081	-1.00059	33.99 development.unspecified	at3g45600	TET3 (TETRASPANIN3)
253113_at	1.54548	-0.628054	2.85131	-1.51162	33.99 development.unspecified	at4g35985	senescence/dehydration-associated protein-related
253161_at	2.82445	-1.49797	3.02508	-1.59697	33.99 development.unspecified	at4g35770	SEN1 (SENESCENCE 1)
253466_at	1.32538	-0.406405	1.77685	-0.829323	33.99 development.unspecified	at4g32040	KNAT5 (KNOTTED1-LIKE HOMEOBOX GENE 5); transcription activator/ transcription factor
255575_at	4.20248	-2.07124	2.35263	-1.23427	33.99 development.unspecified	at4g01430	nodulin MtN21 family protein
255578_at	1.60006	-0.678126	1.97842	-0.984352	33.99 development.unspecified	at4g01450	nodulin MtN21 family protein
255585_at	1.54239	-0.625169	1.84413	-0.882944	33.99 development.unspecified	at4g01550	anac069 (Arabidopsis NAC domain containing protein 69); transcription factor
255957_at	2.66105	-1.412	11.0215	-3.46225	33.99 development.unspecified	at1g22160	senescence-associated protein-related
256293_at	1.49566	-0.580778	1.74103	-0.799942	33.99 development.unspecified	at1g69440	AGO7 (ARGONAUTE7); nucleic acid binding
256300_at	4.57061	-2.19239	7.3291	-2.87364	33.99 development.unspecified	at1g69490	NAP (NAC-like, activated by AP3/PI); transcription factor
256789_at	2.62786	-1.39389	6.54495	-2.71038	33.99 development.unspecified	at3g13672	seven in absentia (SINA) family protein
256927_at	1.76148	-0.816788	3.09795	-1.63132	33.99 development.unspecified	at3g22550	senescence-associated protein-related
257299_at	1.52991	-0.613444	2.88163	-1.52689	33.99 development.unspecified	at3g28050	nodulin MtN21 family protein
257300_at	1.58721	-0.666492	1.92475	-0.944673	33.99 development.unspecified	at3g28080	nodulin MtN21 family protein
258059_at	1.9696	-0.977899	2.18291	-1.12625	33.99 development.unspecified	at3g29035	ATNAC3 (ARABIDOPSIS NAC DOMAIN CONTAINING PROTEIN 3); protein heterodimerization/ transcription factor
258921_at	1.62384	-0.699413	2.42125	-1.27575	33.99 development.unspecified	at3g10500	anac053 (Arabidopsis NAC domain containing protein 53); transcription factor
259440_at	1.30263	-0.381428	1.78498	-0.835907	33.99 development.unspecified	at1g01550	BPS1 (BYPASS 1)
259462_at	1.76984	-0.823619	1.53355	-0.616873	33.99 development.unspecified	at1g18940	nodulin family protein
259871_at	2.78792	-1.47919	2.75267	-1.46083	33.99 development.unspecified	at1g76800	nodulin, putative
260156_at	2.21675	-1.14845	6.29353	-2.65387	33.99 development.unspecified	at1g52880	NAM (NO APICAL MERISTEM); transcription factor
260878_at	1.53768	-0.620758	1.50791	-0.592549	33.99 development.unspecified	at1g21450	SCL1 (SCARECROW-LIKE 1); transcription factor
261335_at	2.77647	-1.47325	2.89237	-1.53225	33.99 development.unspecified	at1g44800	nodulin MtN21 family protein
261448_at	2.46236	-1.30004	3.70529	-1.88959	33.99 development.unspecified	at1g21140	nodulin, putative
261576_at	3.04444	-1.60618	2.37916	-1.25045	33.99 development.unspecified	at1g01070	nodulin MtN21 family protein
262162_at	1.45707	-0.543073	2.01045	-1.00752	33.99 development.unspecified	at1g78020	senescence-associated protein-related
262170_at	1.85189	-0.889002	2.08856	-1.06251	33.99 development.unspecified	at1g74940	senescence-associated protein-related
262514_at	1.39089	-0.476005	1.48295	-0.56847	33.99 development.unspecified	at1g34190	anac017 (Arabidopsis NAC domain containing protein 17); transcription factor
263584_at	2.49916	-1.32145	4.78235	-2.25772	33.99 development.unspecified	at2g17040	anac036 (Arabidopsis NAC domain containing protein 36); transcription factor
263633_at	1.51323	-0.597635	1.91723	-0.939023	33.99 development.unspecified	at2g04890	SCL21 (SCARECROW-LIKE 21); transcription factor
264054_at	1.42536	-0.511328	1.70121	-0.766564	33.99 development.unspecified	at2g22540	SVP (SHORT VEGETATIVE PHASE); transcription factor/ translation repressor, nucleic acid binding
264211_at	1.41548	-0.501288	1.82023	-0.864123	33.99 development.unspecified	at1g22770	GI (GIGANTEA)
264638_at	2.5372	-1.34324	3.99376	-1.99775	33.99 development.unspecified	at1g65480	FT (FLOWERING LOCUS T); phosphatidylethanolamine binding / protein binding
264693_at	1.81308	-0.85844	2.65816	-1.41043	33.99 development.unspecified	at1g69970	CLE26 (CLAVATA3/ESR-RELATED 26); protein binding / receptor binding
266993_at	2.18616	-1.1284	2.38462	-1.25376	33.99 development.unspecified	at2g39210	nodulin family protein
267591_at	1.4672	-0.553069	2.2783	-1.18796	33.99 development.unspecified	at2g39705	RTFL8 (ROTUNDIFOLIA LIKE 8)
257700_at	1.58046	-0.660341	2.27202	-1.18398	34.1 transport.p- and v-ATPases	at3g12740	ALIS1 (ALA-INTERACTING SUBUNIT 1); phospholipid transporter
250863_at	1.80721	-0.853765	2.58403	-1.36962	34.1.3 transport.p- and v-ATPases.inhibitor	at5g04750	F1F0-ATPase inhibitor protein, putative
261322_at	1.39215	-0.477315	2.31073	-1.20835	34.10 transport.nucleotides	at1g44750	ATPUP11; purine transmembrane transporter
254291_at	1.72491	-0.786523	3.27635	-1.71209	34.11 transport.NDP-sugars at the ER	at4g23010	UDP-galactose transporter-related
261485_at	1.44973	-0.535786	1.94686	-0.961147	34.11 transport.NDP-sugars at the ER	at1g14360	UTR3 (UDP-GALACTOSE TRANSPORTER 3); pyrimidine nucleotide sugar transmembrane transporter
245127_at	1.32628	-0.40738	1.90912	-0.932909	34.12 transport.metal	at2g47600	ATMHX (ARABIDOPSIS THALIANA MAGNESIUM/PROTON EXCHANGER); calcium
248276_at	1.65387	-0.725849	1.70927	-0.773382	34.12 transport.metal	at5g53550	YSL3 (YELLOW STRIPE LIKE 3); oligopeptide transporter
249027_at	1.46164	-0.547589	1.93594	-0.953032	34.12 transport.metal	at5g44790	RAN1 (RESPONSIVE-TO-ANTAGONIST 1); ATPase, coupled to transmembrane movement of ions, phosphorylative mechanism / copper i
251906_at	1.61149	-0.688397	2.5132	-1.32953	34.12 transport.metal	at3g53720	ATCHX20 (CATION/H+ EXCHANGER 20); monovalent cation
253657_at	1.45097	-0.53702	1.63798	-0.711915	34.12 transport.metal	at4g30110	HMA2; cadmium-transporting ATPase
254174_at	1.34787	-0.430685	2.39274	-1.25866	34.12 transport.metal	at4g24120	YSL1 (YELLOW STRIPE LIKE 1); oligopeptide transporter
257715_at	1.31543	-0.395535	2.21902	-1.14992	34.12 transport.metal	at3g12750	ZIP1 (ZINC TRANSPORTER 1 PRECURSOR); zinc ion transmembrane transporter
259723_at	1.68126	-0.749546	2.26074	-1.1768	34.12 transport.metal	at1g60960	IRT3; cation transmembrane transporter/ metal ion transmembrane transporter
260462_at	1.45635	-0.542354	3.28991	-1.71805	34.12 transport.metal	at1g10970	ZIP4 (ZINC TRANSPORTER 4 PRECURSOR); cation transmembrane transporter/ copper ion transmembrane transporter
260601_at	1.45491	-0.54093	1.94005	-0.956094	34.12 transport.metal	at1g55910	ZIP11 (ZINC TRANSPORTER 11 PRECURSOR); cation transmembrane transporter/ metal ion transmembrane transporter
261895_at	2.03201	-1.02291	3.04371	-1.60583	34.12 transport.metal	at1g80830	NRAMP1 (NATURAL RESISTANCE-ASSOCIATED MACROPHAGE PROTEIN 1); inorganic anion transmembrane transporter/ manga
267488_at	1.40769	-0.493331	1.4835	-0.569005	34.12 transport.metal	at2g19110	HMA4; cadmium ion transmembrane transporter/ cadmium-transporting ATPase/ zinc ion transmembrane transporter
246302_at	2.72839	-1.44805	2.98736	-1.57887	34.12 transport.metal AND 34.21 transport.calcium	at3g51860	CAX3 (CATION EXCHANGER 3); calcium
247440_at	1.35237	-0.435491	1.73204	-0.792471	34.13 transport.peptides and oligopeptides	at5g62680	proton-dependent oligopeptide transport (POT) family protein
248037_at	1.86289	-0.897543	2.96869	-1.56983	34.13 transport.peptides and oligopeptides	at5g55930	OPT1 (OLIGOPEPTIDE TRANSPORTER 1); oligopeptide transporter
248932_at	2.07061	-1.05006	2.3916	-1.25797	34.13 transport.peptides and oligopeptides	at5g46050	PTR3 (PEPTIDE TRANSPORTER 3); dipeptide transporter/ transporter/ tripeptide transporter
255877_at	1.51336	-0.597759	3.18173	-1.66981	34.13 transport.peptides and oligopeptides	at2g40460	proton-dependent oligopeptide transport (POT) family protein
260693_at	2.38173	-1.25201	4.19086	-2.06725	34.13 transport.peptides and oligopeptides	at1g32450	NRT1.5 (NITRATE TRANSPORTER 1.5); nitrate transmembrane transporter/ transporter
261425_at	1.67308	-0.742508	3.28285	-1.71495	34.13 transport.peptides and oligopeptides	at1g18880	proton-dependent oligopeptide transport (POT) family protein
248970_at	2.17487	-1.12093	8.84672	-3.14514	34.14 transport.unspecified cations	at5g45380	sodium
251508_at	1.32154	-0.402223	1.53541	-0.618624	34.14 transport.unspecified cations	at3g58970	magnesium transporter CorA-like family protein
257019_at	1.47251	-0.558277	2.433	-1.28274	34.14 transport.unspecified cations	at3g19640	magnesium transporter CorA-like family protein (MRS2-3)
261336_at	1.27492	-0.350407	1.58581	-0.665216	34.14 transport.unspecified cations	at1g44790	ChaC-like family protein
263171_at	1.29818	-0.37649	1.75249	-0.809403	34.14 transport.unspecified cations	at1g54115	CCX4 (CATION CALCIUM EXCHANGER 4); cation
248117_at	1.66345	-0.734182	2.4635	-1.30071	34.15 transport.potassium	at5g55000	FIP2; protein binding / voltage-gated potassium channel
248888_at	2.30912	-1.20734	1.80462	-0.851696	34.15 transport.potassium	at5g46240	KAT1 (POTASSIUM CHANNEL IN ARABIDOPSIS THALIANA 1); cyclic nucleotide binding / inward rectifier potassium channel
264607_at	1.48269	-0.568216	2.54247	-1.34623	34.15 transport.potassium	at1g04690	KAB1 (POTASSIUM CHANNEL BETA SUBUNIT); oxidoreductase/ potassium channel
249487_at	1.48332	-0.568826	1.63937	-0.713145	34.16 transport.ABC transporters and multidrug resistance systems	at5g39040	ATTAP2; ATPase, coupled to transmembrane movement of substances / transporter
252379_at	1.31547	-0.39558	1.50641	-0.591116	34.16 transport.ABC transporters and multidrug resistance systems	at3g47730	ATATH1; ATPase, coupled to transmembrane movement of substances / transporter
260002_at	1.89387	-0.921338	5.95884	-2.57503	34.16 transport.ABC transporters and multidrug resistance systems	at1g67940	ATNAP3; transporter
266464_at	1.49031	-0.575616	2.71142	-1.43905	34.16 transport.ABC transporters and multidrug resistance systems	at2g47800	ATMRP4 (ARABIDOPSIS THALIANA MULTIDRUG RESISTANCE-ASSOCIATED PROTEIN 4); ATPase, coupled to transmembrane movement of su
267363_at	1.38451	-0.469373	1.83893	-0.878868	34.17 transport.peroxisomes	at2g39970	peroxisomal membrane protein (PMP36)
248580_at	1.54455	-0.627182	2.28646	-1.19311	34.18 transport.unspecified anions	at5g49890	CLC-C (CHLORIDE CHANNEL C); anion channel/ voltage-gated chloride channel
258913_at	1.53254	-0.615923	2.21213	-1.14543	34.18 transport.unspecified anions	at3g06450	anion exchange family protein
245399_at	1.49871	-0.583717	1.80744	-0.853946	34.19.2 transport.Major Intrinsic Proteins.TIP	at4g17340	TIP2;2 (TONOPLAST INTRINSIC PROTEIN 2;2); water channel
254971_at	1.88074	-0.911302	2.94758	-1.55953	34.19.3 transport.Major Intrinsic Proteins.NIP	at4g10380	NIP5;1; arsenite transmembrane transporter/ boron transporter/ water channel
261881_at	2.03532	-1.02526	2.81332	-1.49227	34.19.3 transport.Major Intrinsic Proteins.NIP	at1g80760	NIP6;1 (NOD26-LIKE INTRINSIC PROTEIN 6;1); boron transporter/ glycerol transmembrane transporter/ urea transmembra
251661_at	1.44118	-0.527255	3.35089	-1.74455	34.19.4 transport.Major Intrinsic Proteins.SIP	at3g56950	SIP2;1; transporter
246831_at	2.13492	-1.09418	3.40323	-1.7669	34.2 transport.sugars	at5g26340	MSS1; carbohydrate transmembrane transporter/ hexose
257805_at	1.81504	-0.860004	4.81447	-2.26738	34.2 transport.sugars	at3g18830	ATPLT5 (POLYOL TRANSPORTER 5); D-ribose transmembrane transporter/ D-xylose transmembrane transporter/ carbohydrate transmembr
250054_at	1.90201	-0.927525	13.8888	-3.79585	34.21 transport.calcium	at5g17860	CAX7 (calcium exchanger 7); calcium
255599_at	1.67909	-0.747683	1.95664	-0.968377	34.22 transport.cyclic nucleotide or calcium regulated channels	at4g01010	ATCNGC13; calmodulin binding / cyclic nucleotide binding / ion channel
263776_s_at	2.29721	-1.19989	2.45335	-1.29475	34.22 transport.cyclic nucleotide or calcium regulated channels	MULTIPLE HITS	ATARD1 (ACIREDUCTONE DIOXYGENASE 1); acireductone dioxygenase [iron(II)-requiring]/ metal
245868_at	1.43545	-0.521501	1.99678	-0.997676	34.3 transport.amino acids	at1g58030	CAT2 (CATIONIC AMINO ACID TRANSPORTER 2); amino acid transmembrane transporter
245891_at	1.97696	-0.983281	4.08051	-2.02875	34.3 transport.amino acids	at5g09220	AAP2 (AMINO ACID PERMEASE 2); amino acid transmembrane transporter
246259_at	1.39048	-0.475581	1.84789	-0.885881	34.3 transport.amino acids	at1g31830	amino acid permease family protein
246260_at	3.53382	-1.82123	7.77606	-2.95904	34.3 transport.amino acids	at1g31820	amino acid permease family protein
247304_at	1.9314	-0.94965	3.56722	-1.8348	34.3 transport.amino acids	at5g63850	AAP4; acidic amino acid transmembrane transporter/ amino acid transmembrane transporter/ neutral amino acid transmembrane transp
248619_at	1.51558	-0.599874	1.5532	-0.635243	34.3 transport.amino acids	at5g49630	AAP6 (AMINO ACID PERMEASE 6); acidic amino acid transmembrane transporter/ amino acid transmembrane transporter/ neutral amino a
249346_at	2.59124	-1.37364	3.16405	-1.66177	34.3 transport.amino acids	at5g40780	LHT1; amino acid transmembrane transporter
255726_at	1.86262	-0.897335	3.07518	-1.62067	34.3 transport.amino acids	at1g25530	lysine and histidine specific transporter, putative
256711_at	1.27519	-0.350708	1.50116	-0.586078	34.3 transport.amino acids	at3g30390	amino acid transporter family protein
259337_at	1.33436	-0.416148	1.94654	-0.96091	34.3 transport.amino acids	at3g03720	CAT4 (CATIONIC AMINO ACID TRANSPORTER 4); cationic amino acid transmembrane transporter
263827_at	1.3177	-0.398022	1.55108	-0.633272	34.3 transport.amino acids	at2g40420	amino acid transporter family protein
267358_at	1.64664	-0.719523	3.05789	-1.61254	34.3 transport.amino acids	at2g39890	PROT1 (PROLINE TRANSPORTER 1); L-proline transmembrane transporter/ amino acid transmembrane transporter
254723_at	1.49867	-0.583679	1.74951	-0.806951	34.5 transport.ammonium	at4g13510	AMT1;1 (AMMONIUM TRANSPORTER 1;1); ammonium transmembrane transporter
246310_at	1.73695	-0.796557	3.35069	-1.74446	34.6 transport.sulphate	at3g51895	SULTR3;1 (SULFATE TRANSPORTER 3;1); secondary active sulfate transmembrane transporter/ sulfate transmembrane transpo
262134_at	1.50331	-0.588141	3.14983	-1.65528	34.6 transport.sulphate	at1g77990	AST56; sulfate transmembrane transporter
246779_at	1.571	-0.651686	2.18253	-1.126	34.9 transport.metabolite transporters at the mitochondrial membrane	at5g27520	PNC2 (PEROXISOMAL ADENINE NUCLEOTIDE CARRIER 2); ADP transmembrane transporter/ ATP transmembrane transporter/ binding
251189_at	1.52741	-0.611087	2.39021	-1.25714	34.9 transport.metabolite transporters at the mitochondrial membrane	at3g62650	unknown protein
251757_at	1.47676	-0.562437	2.48433	-1.31286	34.9 transport.metabolite transporters at the mitochondrial membrane	at3g55640	mitochondrial substrate carrier family protein
253776_at	1.88809	-0.916925	3.73429	-1.90083	34.9 transport.metabolite transporters at the mitochondrial membrane	at4g28390	AAC3 (ADP/ATP CARRIER 3); ATP
246239_at	1.32559	-0.406635	1.62032	-0.696282	34.99 transport.misc	at4g36790	transporter-related
247851_at	1.28459	-0.361305	2.94704	-1.55927	34.99 transport.misc	at5g58070	TIL (TEMPERATURE-INDUCED LIPOCALIN); binding / transporter
254301_at	1.57577	-0.65606	1.98492	-0.989078	34.99 transport.misc	at4g22790	MATE efflux family protein
254683_at	1.44164	-0.527709	3.19012	-1.67361	34.99 transport.misc	at4g13800	permease-related
258107_at	1.61636	-0.692749	2.0942	-1.0664	34.99 transport.misc	at3g23560	ALF5 (ABERRANT LATERAL ROOT FORMATION 5); antiporter/ drug transporter/ transporter
259980_at	1.79135	-0.841045	5.00023	-2.32199	34.99 transport.misc	at1g76520	auxin efflux carrier family protein
260852_at	1.47457	-0.560296	1.93364	-0.951322	34.99 transport.misc	at1g21900	emp24/gp25L/p24 family protein
262309_at	2.31032	-1.20809	1.68539	-0.75308	4.2.2 glycolysis.plastid branch.phosphoglucomutase (PGM)	at1g70820	phosphoglucomutase, putative / glucose phosphomutase, putative
264044_at	1.39502	-0.480285	1.94448	-0.959385	4.2.4 glycolysis.plastid branch.phosphofructokinase (PFK)	at2g22480	PFK5 (PHOSPHOFRUCTOKINASE 5); 6-phosphofructokinase
247983_at	1.26557	-0.339787	2.34279	-1.22823	4.3.4 glycolysis.unclear/dually targeted.phosphofructokinase (PFK)	at5g56630	PFK7 (PHOSPHOFRUCTOKINASE 7); 6-phosphofructokinase
263157_at	2.17815	-1.1231	11.0335	-3.46382	5.10 fermentation.aldehyde dehydrogenase	at1g54100	ALDH7B4 (Aldehyde Dehydrogenase 7B4); 3-chloroallyl aldehyde dehydrogenase/ oxidoreductase
248138_at	1.66348	-0.7342	6.00722	-2.5867	5.2 fermentation.PDC	at5g54960	PDC2 (pyruvate decarboxylase-2); carboxy-lyase/ catalytic/ magnesium ion binding / pyruvate decarboxylase/ thiamin pyrophosphate
263986_at	1.66815	-0.738247	3.21779	-1.68607	6.1 gluconeogenesis / glyoxylate cycle.citrate synthase	at2g42790	CSY3 (citrate synthase 3); citrate (SI)-synthase
250498_at	1.28609	-0.362987	1.40046	-0.485905	6.3 gluconeogenesis / glyoxylate cycle.Malate DH	at5g09660	PMDH2 (peroxisomal NAD-malate dehydrogenase 2); malate dehydrogenase
253041_at	1.3127	-0.392533	1.81132	-0.85704	6.4 gluconeogenesis / glyoxylate cycle.PEPCK	at4g37870	PCK1 (PHOSPHOENOLPYRUVATE CARBOXYKINASE 1); ATP binding / phosphoenolpyruvate carboxykinase (ATP)/ phosphoenolpyruvate ca
245528_at	2.75653	-1.46285	7.57694	-2.92162	6.5 gluconeogenesis / glyoxylate cycle.pyruvate dikinase	at4g15530	PPDK (pyruvate orthophosphate dikinase); kinase/ pyruvate, phosphate dikinase
245977_at	1.33062	-0.412099	1.62224	-0.697987	7.1.1 OPP.oxidative PP.G6PD	at5g13110	G6PD2 (GLUCOSE-6-PHOSPHATE DEHYDROGENASE 2); glucose-6-phosphate dehydrogenase
249372_at	1.73347	-0.793659	2.89748	-1.5348	7.1.1 OPP.oxidative PP.G6PD	at5g40760	G6PD6 (GLUCOSE-6-PHOSPHATE DEHYDROGENASE 6); glucose-6-phosphate dehydrogenase
258999_at	1.33977	-0.421984	2.00944	-1.00679	7.2.3 OPP.non-reductive PP.ribulose-phosphate 3-epimerase	at3g01850	ribulose-phosphate 3-epimerase, cytosolic, putative / pentose-5-phosphate 3-epimerase, putative
261806_at	1.57113	-0.651802	1.41671	-0.502549	7.3 OPP.electron transfer	at1g30510	ATRFNR2 (ROOT FNR 2); FAD binding / NADP or NADPH binding / electron carrier/ ferredoxin-NADP+ reductase/ oxidoreductase
262962_at	1.29798	-0.376267	2.7237	-1.44557	8.1.4 TCA / org transformation.TCA.IDH	at1g54340	ICDH (ISOCITRATE DEHYDROGENASE); isocitrate dehydrogenase (NADP+)/ oxidoreductase, acting on the CH-OH group of donors, NAD or N
250339_at	1.64592	-0.718898	2.68784	-1.42645	8.2.10 TCA / org transformation.other organic acid transformatons.malic	at5g11670	ATNADP-ME2 (NADP-malic enzyme 2); malate dehydrogenase (oxaloacetate-decarboxylating) (NADP+)/ malic enzyme/ oxidoreductas
263717_at	1.42096	-0.506867	1.7085	-0.772726	8.2.10 TCA / org transformation.other organic acid transformatons.malic	at2g13560	malate oxidoreductase, putative
264504_at	1.41975	-0.505634	1.66872	-0.738743	8.2.11 TCA / org transformation.other organic acid transformatons.atp-citrate lyase	at1g09430	ACLA-3; ATP citrate synthase
246396_at	1.83495	-0.875739	3.10231	-1.63334	8.3 TCA / org transformation.carbonic anhydrases	at1g58180	carbonic anhydrase family protein / carbonate dehydratase family protein
244920_s_at	1.54797	-0.630374	1.67025	-0.740068	9.1.2 mitochondrial electron transport / ATP synthesis.NADH-DH.localisation not clear	MULTIPLE HITS	ATARD1 (ACIREDUCTONE DIOXYGENASE 1); acireductone dioxygenase [iron(II)-requiring]/ metal
255259_at	1.54098	-0.623849	3.31408	-1.72861	9.2.1.2 mitochondrial electron transport / ATP synthesis.NADH-DH.type II.external	at4g05020	NDB2 (NAD(P)H dehydrogenase B2); FAD binding / disulfide oxidoreductase/ oxidoreductase
266835_at	1.56316	-0.644462	3.72511	-1.89728	9.2.1.4 mitochondrial electron transport / ATP synthesis.NADH-DH.type II.internal matrix	at2g29990	NDA2 (ALTERNATIVE NAD(P)H DEHYDROGENASE 2); FAD binding / NADH dehydrogenase/ oxidoreductase
249158_at	1.30436	-0.38334	2.17058	-1.11808	9.3 mitochondrial electron transport / ATP synthesis.electron transfer flavoprotein	at5g43430	ETFBETA; electron carrier
256209_at	1.65315	-0.725214	3.3918	-1.76205	9.3 mitochondrial electron transport / ATP synthesis.electron transfer flavoprotein	at1g50940	ETFALPHA (electron transfer flavoprotein alpha); FAD binding / electron carrier
258452_at	1.65543	-0.727204	4.1921	-2.06767	9.4 mitochondrial electron transport / ATP synthesis.alternative oxidase	at3g22370	AOX1A (ALTERNATIVE OXIDASE 1A); alternative oxidase
253436_at	1.20752	-0.272049	1.65205	-0.724257	9.5 mitochondrial electron transport / ATP synthesis.cytochrome c reductase	at4g32470	ubiquinol-cytochrome C reductase complex 14 kDa protein, putative
258772_at	1.35592	-0.439267	1.41043	-0.49613	9.5 mitochondrial electron transport / ATP synthesis.cytochrome c reductase	at3g10860	ubiquinol-cytochrome C reductase complex ubiquinone-binding protein, putative / ubiquinol-cytochrome C reductase complex 8.2 kDa protein, putati
257333_at	1.6236	-0.699194	2.04145	-1.02959	9.7 mitochondrial electron transport / ATP synthesis.cytochrome c oxidase	atmg01360	cytochrome c oxidase subunit 1
259446_at	1.29068	-0.368134	1.44331	-0.529382	9.7 mitochondrial electron transport / ATP synthesis.cytochrome c oxidase	at1g02410	cytochrome c oxidase assembly protein CtaG / Cox11 family
260579_at	1.3156	-0.395724	1.42751	-0.513502	9.7 mitochondrial electron transport / ATP synthesis.cytochrome c oxidase	at2g47380	cytochrome c oxidase subunit Vc family protein / COX5C family protein
264038_at	1.31805	-0.398403	1.76608	-0.820551	9.99 mitochondrial electron transport / ATP synthesis.unspecified	at2g03690	coenzyme Q biosynthesis Coq4 family protein / ubiquinone biosynthesis Coq4 family protein
Down-regulated genes in LED200/LED500
probe set	FC LED 200	log FC LED 200	FC LED 500	log FC LED 500	BIN	AGI ID	Annotation
245368_at	1.65043	0.722841	5.06403	2.34029	1.1.1.2 PS.lightreaction.photosystem II.PSII polypeptide subunits	at4g15510	photosystem II reaction center PsbP family protein
262572_at	1.42934	0.515353	2.68168	1.42313	1.1.5.4 PS.lightreaction.other electron carrier (ox/red).ferredoxin oxireductase	at1g15140	oxidoreductase NAD-binding domain-containing protein
253438_at	1.35071	0.433721	1.48608	0.571512	1.2.5 PS.photorespiration.serine hydroxymethyltransferase AND 25.1 C1-metabolism.glycine hydroxymethyltransferase	at4g32520	SHM3 (SERINE HYDROXYMETHYLTRANSFERASE 3); catalytic/ glycine hydroxymethyltransferase/ pyridoxal phosphate binding
254501_at	1.9448	0.959624	3.44827	1.78587	1.3.13 PS.calvin cycle.rubisco interacting	at4g20130	PTAC14 (PLASTID TRANSCRIPTIONALLY ACTIVE14)
254502_at	1.84632	0.884654	3.45339	1.78801	1.3.13 PS.calvin cycle.rubisco interacting	at4g20130	PTAC14 (PLASTID TRANSCRIPTIONALLY ACTIVE14)
262648_at	1.48108	0.566645	2.58096	1.36791	1.3.13 PS.calvin cycle.rubisco interacting	at1g14030	ribulose-1,5 bisphosphate carboxylase oxygenase large subunit N-methyltransferase, putative
264069_at	1.56749	0.648454	5.14549	2.36331	1.3.13 PS.calvin cycle.rubisco interacting	at2g28000	CPN60A (CHAPERONIN-60ALPHA); ATP binding / protein binding
256575_at	1.36106	0.444732	1.69339	0.759914	10.1.10 cell wall.precursor synthesis.UDP-glucose 4,6-dehydratase	at3g14790	RHM3 (RHAMNOSE BIOSYNTHESIS 3); UDP-L-rhamnose synthase/ catalytic
263134_at	1.65357	0.725588	1.37329	0.457639	10.1.10 cell wall.precursor synthesis.UDP-glucose 4,6-dehydratase	at1g78570	RHM1 (RHAMNOSE BIOSYNTHESIS 1); UDP-L-rhamnose synthase/ UDP-glucose 4,6-dehydratase/ catalytic
251855_at	1.54446	0.627103	1.79889	0.847105	10.1.12.1 cell wall.precursor synthesis.KDO pathway.arabinose-5-phosphate isomerase	at3g54690	sugar isomerase (SIS) domain-containing protein / CBS domain-containing protein
258483_at	1.59665	0.67505	1.3394	0.421591	10.1.20 cell wall.precursor synthesis.phosphomannose isomerase	at3g02570	MEE31 (MATERNAL EFFECT EMBRYO ARREST 31); mannose-6-phosphate isomerase
258766_at	1.60069	0.678695	1.81245	0.857943	10.1.30.1 cell wall.precursor synthesis.sugar kinases.galacturonic acid kinase	at3g10700	GHMP kinase family protein
246511_at	1.46242	0.548358	1.68993	0.756959	10.1.4 cell wall.precursor synthesis.UDP-Glc dehydrogenase (UGD)	at5g15490	UDP-glucose 6-dehydrogenase, putative
249469_at	1.74248	0.801145	3.40336	1.76696	10.1.4 cell wall.precursor synthesis.UDP-Glc dehydrogenase (UGD)	at5g39320	UDP-glucose 6-dehydrogenase, putative
245133_at	1.35159	0.434657	1.78228	0.833726	10.1.6 cell wall.precursor synthesis.GAE	at2g45310	GAE4 (UDP-D-GLUCURONATE 4-EPIMERASE 4); binding / catalytic/ coenzyme binding / racemase and epimerase, acting on carbohydrates
250892_at	1.52893	0.612525	2.22001	1.15057	10.2 cell wall.cellulose synthesis	at5g03760	ATCSLA09; mannan synthase/ transferase, transferring glycosyl groups
257071_at	1.33529	0.417148	2.19713	1.13562	10.2 cell wall.cellulose synthesis	at3g28180	ATCSLC04 (CELLULOSE-SYNTHASE LIKE C4); cellulose synthase/ transferase, transferring glycosyl groups
247251_at	1.58517	0.66464	2.04353	1.03106	10.2.1 cell wall.cellulose synthesis.cellulose synthase	at5g64740	CESA6 (CELLULOSE SYNTHASE 6); cellulose synthase/ transferase, transferring glycosyl groups
250505_at	1.511	0.595502	1.39081	0.475927	10.2.1 cell wall.cellulose synthesis.cellulose synthase	at5g09870	CESA5 (CELLULOSE SYNTHASE 5); cellulose synthase/ transferase, transferring glycosyl groups
262109_at	1.39144	0.476579	2.65574	1.40912	10.2.1 cell wall.cellulose synthesis.cellulose synthase	at1g02730	ATCSLD5; 1,4-beta-D-xylan synthase/ cellulose synthase
265175_at	1.517	0.601217	6.25261	2.64446	10.2.1 cell wall.cellulose synthesis.cellulose synthase	at1g23480	ATCSLA03 (CELLULOSE SYNTHASE-LIKE A3); cellulose synthase/ transferase, transferring glycosyl groups
248074_at	2.24249	1.1651	3.45448	1.78847	10.5.1.1 cell wall.cell wall proteins.AGPs.AGP	at5g55730	FLA1 (FASCICLIN-LIKE ARAB INOGALACTAN 1)
250437_at	2.03595	1.0257	2.16174	1.1122	10.5.1.1 cell wall.cell wall proteins.AGPs.AGP	at5g10430	AGP4 (ARABINOGALACTAN PROTEIN 4)
251395_at	2.26482	1.1794	10.9678	3.4552	10.5.1.1 cell wall.cell wall proteins.AGPs.AGP	at2g45470	FLA8 (FASCICLIN-LIKE ARABINOGALACTAN PROTEIN 8)
253050_at	1.72851	0.789528	3.41056	1.77001	10.5.1.1 cell wall.cell wall proteins.AGPs.AGP	at4g37450	AGP18 (ARABINOGALACTAN PROTEIN 18)
254785_at	2.20599	1.14143	6.56224	2.71419	10.5.1.1 cell wall.cell wall proteins.AGPs.AGP	at4g12730	FLA2 (FASCICLIN-LIKE ARABINOGALACTAN 2)
255080_at	1.48747	0.572857	1.28798	0.365106	10.5.1.1 cell wall.cell wall proteins.AGPs.AGP	at4g09030	AGP10 (ARABINOGALACTAN PROTEIN 10)
256673_at	1.52421	0.608063	1.49062	0.575913	10.5.1.1 cell wall.cell wall proteins.AGPs.AGP	at3g52370	FLA15 (FASCICLIN-LIKE ARABINOGALACTAN PROTEIN 15 PRECURSOR)
256964_at	1.69271	0.759332	2.666	1.41468	10.5.1.1 cell wall.cell wall proteins.AGPs.AGP	at3g13520	AGP12 (ARABINOGALACTAN PROTEIN 12)
263628_at	2.10888	1.07648	4.78893	2.2597	10.5.1.1 cell wall.cell wall proteins.AGPs.AGP	at2g04780	FLA7 (FASCICLIN-LIKE ARABINOOGALACTAN 7)
264005_at	1.49468	0.579835	1.35467	0.437946	10.5.1.1 cell wall.cell wall proteins.AGPs.AGP	at2g22470	AGP2 (ARABINOGALACTAN PROTEIN 2)
265066_at	2.2155	1.14763	10.4003	3.37855	10.5.1.1 cell wall.cell wall proteins.AGPs.AGP	at1g03870	FLA9 (FASCICLIN-LIKE ARABINOOGALACTAN 9)
266460_at	1.73539	0.795263	3.03094	1.59977	10.5.1.1 cell wall.cell wall proteins.AGPs.AGP	at2g47930	AGP26 (ARABINOGALACTAN PROTEIN 26)
266552_at	1.68361	0.751558	4.63251	2.21179	10.5.1.1 cell wall.cell wall proteins.AGPs.AGP	at2g46330	AGP16 (ARABINOGALACTAN PROTEIN 16)
266588_at	1.65101	0.723349	4.4058	2.1394	10.5.1.1 cell wall.cell wall proteins.AGPs.AGP	at2g14890	AGP9 (ARABINOGALACTAN PROTEIN 9)
252971_at	2.03979	1.02842	6.52339	2.70562	10.5.2 cell wall.cell wall proteins.proline rich proteins	at4g38770	PRP4 (PROLINE-RICH PROTEIN 4)
254635_at	1.73035	0.791061	1.91085	0.934217	10.5.3 cell wall.cell wall proteins.LRR	at4g18670	protein binding / structural constituent of cell wall
259077_s_at	1.52868	0.612291	1.37405	0.458436	10.5.5 cell wall.cell wall proteins.RGP	MULTIPLE HITS	ATARD1 (ACIREDUCTONE DIOXYGENASE 1); acireductone dioxygenase [iron(II)-requiring]/ metal
246184_at	1.37465	0.459061	2.31039	1.20814	10.6.1 cell wall.degradation.cellulases and beta -1,4-glucanases	at5g20950	glycosyl hydrolase family 3 protein
255756_at	1.33891	0.421063	1.56954	0.65034	10.6.1 cell wall.degradation.cellulases and beta -1,4-glucanases	at1g19940	AtGH9B5 (Arabidopsis thaliana Glycosyl Hydrolase 9B5); catalytic/ hydrolase, hydrolyzing O-glycosyl compounds
250499_at	1.64781	0.720554	3.28048	1.71391	10.6.2 cell wall.degradation.mannan-xylose-arabinose-fucose	at5g09730	BXL3 (beta-xylosidase 3); hydrolase, hydrolyzing O-glycosyl compounds
262181_at	1.28192	0.35831	1.76611	0.820572	10.6.2 cell wall.degradation.mannan-xylose-arabinose-fucose	at1g78060	glycosyl hydrolase family 3 protein
254221_at	1.82021	0.864106	15.5035	3.95452	10.6.3 cell wall.degradation.pectate lyases and polygalacturonases	at4g23820	glycoside hydrolase family 28 protein / polygalacturonase (pectinase) family protein
258528_at	1.74269	0.801318	4.86469	2.28235	10.6.3 cell wall.degradation.pectate lyases and polygalacturonases	at3g06770	glycoside hydrolase family 28 protein / polygalacturonase (pectinase) family protein
264315_at	1.4724	0.558173	3.38717	1.76008	10.6.3 cell wall.degradation.pectate lyases and polygalacturonases	at1g70370	BURP domain-containing protein / polygalacturonase, putative
264611_at	1.87161	0.90428	2.14688	1.10224	10.6.3 cell wall.degradation.pectate lyases and polygalacturonases	at1g04680	pectate lyase family protein
247162_at	1.60621	0.683661	6.16235	2.62348	10.7 cell wall.modification	at5g65730	xyloglucan:xyloglucosyl transferase, putative / xyloglucan endotransglycosylase, putative / endo-xyloglucan transferase, putative
250992_at	2.06405	1.04547	2.40853	1.26815	10.7 cell wall.modification	at5g02260	ATEXPA9 (ARABIDOPSIS THALIANA EXPANSIN A9)
252997_at	1.81637	0.861055	2.66436	1.41379	10.7 cell wall.modification	at4g38400	ATEXLA2 (ARABIDOPSIS THALIANA EXPANSIN-LIKE A2)
257203_at	2.44209	1.28812	5.70765	2.5129	10.7 cell wall.modification	at3g23730	xyloglucan:xyloglucosyl transferase, putative / xyloglucan endotransglycosylase, putative / endo-xyloglucan transferase, putative
258003_at	1.64363	0.716887	3.5732	1.83722	10.7 cell wall.modification	at3g29030	EXPA5 (EXPANSIN A5)
258877_at	1.5292	0.612774	1.61337	0.690077	10.7 cell wall.modification	at3g03220	ATEXPA13 (ARABIDOPSIS THALIANA EXPANSIN A13)
261825_at	2.35576	1.23619	6.969	2.80095	10.7 cell wall.modification	at1g11545	xyloglucan:xyloglucosyl transferase, putative / xyloglucan endotransglycosylase, putative / endo-xyloglucan transferase, putative
263207_at	1.91026	0.933771	2.65583	1.40916	10.7 cell wall.modification	at1g10550	XTH33; hydrolase, acting on glycosyl bonds / hydrolase, hydrolyzing O-glycosyl compounds / xyloglucan
265443_at	2.29902	1.20102	6.72325	2.74916	10.7 cell wall.modification	at2g20750	ATEXPB1 (ARABIDOPSIS THALIANA EXPANSIN B1)
266215_at	1.68825	0.755529	10.9764	3.45634	10.7 cell wall.modification	at2g06850	EXGT-A1 (ENDOXYLOGLUCAN TRANSFERASE); hydrolase, acting on glycosyl bonds / xyloglucan
248593_at	1.39831	0.483689	1.36857	0.452674	10.8.1 cell wall.pectin*esterases.PME	at5g49180	pectinesterase family protein
258764_at	1.70004	0.765566	5.50367	2.46039	10.8.1 cell wall.pectin*esterases.PME	at3g10720	pectinesterase, putative
261363_at	1.40278	0.488289	2.20569	1.14123	10.8.1 cell wall.pectin*esterases.PME	at1g41830	SKS6 (SKU5-SIMILAR 6); pectinesterase
248704_at	1.39332	0.478524	1.67088	0.74061	10.8.99 cell wall.pectin*esterases.misc	at5g48450	sks3 (SKU5 Similar 3); copper ion binding / oxidoreductase
251736_at	1.61946	0.695513	2.93377	1.55275	11.1.1 lipid metabolism.FA synthesis and FA elongation.Acetyl CoA Carboxylation	at3g56130	biotin/lipoyl attachment domain-containing protein
266099_at	1.28225	0.358681	1.5512	0.633383	11.1.1.2.1 lipid metabolism.FA synthesis and FA elongation.Acetyl CoA Carboxylation.heteromeric Complex.alpha Carboxyltransferase	at2g38040	CAC3; acetyl-CoA carboxylase
250125_at	1.58885	0.667981	2.86385	1.51795	11.1.1.2.3 lipid metabolism.FA synthesis and FA elongation.Acetyl CoA Carboxylation.heteromeric Complex.Biotin Carboxyl Carrier Protein	at5g16390	CAC1 (CHLOROPLASTIC ACETYLCOENZYME A CARBOXYLASE 1); acetyl-CoA carboxylase/ biotin binding
249123_at	1.29281	0.370507	2.23252	1.15868	11.1.10 lipid metabolism.FA synthesis and FA elongation.beta ketoacyl CoA synthase	at5g43760	KCS20 (3-KETOACYL-COA SYNTHASE 20); fatty acid elongase
261420_at	1.70749	0.771881	1.34763	0.430422	11.1.10 lipid metabolism.FA synthesis and FA elongation.beta ketoacyl CoA synthase	at1g07720	KCS3 (3-KETOACYL-COA SYNTHASE 3); acyltransferase/ catalytic/ transferase, transferring acyl groups other than amino-acyl groups
261570_at	1.59418	0.672819	3.00967	1.58961	11.1.10 lipid metabolism.FA synthesis and FA elongation.beta ketoacyl CoA synthase	at1g01120	KCS1 (3-KETOACYL-COA SYNTHASE 1); acyltransferase/ fatty acid elongase
253285_at	1.4007	0.486146	1.91982	0.940975	11.1.11 lipid metabolism.FA synthesis and FA elongation.fatty acid elongase	at4g34250	KCS16 (3-KETOACYL-COA SYNTHASE 16); acyltransferase/ catalytic/ transferase, transferring acyl groups other than amino-acyl gro
265918_at	1.75144	0.808542	2.1685	1.11669	11.1.11 lipid metabolism.FA synthesis and FA elongation.fatty acid elongase	at2g15090	KCS8 (3-KETOACYL-COA SYNTHASE 8); acyltransferase/ catalytic/ transferase, transferring acyl groups other than amino-acyl groups
267308_at	1.87351	0.905747	4.35079	2.12128	11.1.2 lipid metabolism.FA synthesis and FA elongation.Acetyl CoA Transacylase	at2g30200	[acyl-carrier-protein] S-malonyltransferase/ binding / catalytic/ transferase
248903_at	1.44977	0.535822	2.93172	1.55175	11.1.3 lipid metabolism.FA synthesis and FA elongation.ketoacyl ACP synthase	at5g46290	KAS I (3-KETOACYL-ACYL CARRIER PROTEIN SYNTHASE I); catalytic/ fatty-acid synthase/ transferase, transferring acyl groups other
265120_at	1.61067	0.687659	2.20539	1.14103	11.1.3 lipid metabolism.FA synthesis and FA elongation.ketoacyl ACP synthase	at1g62640	KAS III (3-KETOACYL-ACYL CARRIER PROTEIN SYNTHASE III); 3-oxoacyl-[acyl-carrier-protein] synthase/ catalytic/ transferase, tr
245291_at	1.32639	0.407505	2.76468	1.46711	11.1.31 lipid metabolism.FA synthesis and FA elongation.pyruvate DH	at4g16155	dihydrolipoyl dehydrogenase
258086_at	1.51266	0.597084	2.51171	1.32867	11.1.31 lipid metabolism.FA synthesis and FA elongation.pyruvate DH	at3g25860	LTA2; dihydrolipoyllysine-residue acetyltransferase
265026_at	1.42633	0.512304	1.79498	0.843965	11.1.4 lipid metabolism.FA synthesis and FA elongation.ACP oxoacyl reductase	at1g24360	3-oxoacyl-(acyl-carrier protein) reductase, chloroplast / 3-ketoacyl-acyl carrier protein reductase
250470_at	1.33187	0.41345	1.98025	0.985681	11.1.5 lipid metabolism.FA synthesis and FA elongation.beta hydroxyacyl ACP dehydratase	at5g10160	beta-hydroxyacyl-ACP dehydratase, putative
266035_at	1.71448	0.77777	4.68672	2.22858	11.1.6 lipid metabolism.FA synthesis and FA elongation.enoyl ACP reductase	at2g05990	MOD1 (MOSAIC DEATH 1); enoyl-[acyl-carrier-protein] reductase (NADH)/ enoyl-[acyl-carrier-protein] reductase/ oxidoreducta
262414_at	1.40859	0.494249	2.32575	1.21769	11.1.9 lipid metabolism.FA synthesis and FA elongation.long chain fatty acid CoA ligase	at1g49430	LACS2 (LONG-CHAIN ACYL-COA SYNTHETASE 2); long-chain-fatty-acid-CoA ligase
259391_s_at	2.48071	1.31076	7.11651	2.83117	11.2.1 lipid metabolism.FA desaturation.desaturase	MULTIPLE HITS	ATARD1 (ACIREDUCTONE DIOXYGENASE 1); acireductone dioxygenase [iron(II)-requiring]/ metal
254448_at	1.39564	0.480922	1.72387	0.785654	11.2.2 lipid metabolism.FA desaturation.a hydroxylase	at4g20870	FAH2 (FATTY ACID HYDROXYLASE 2); catalytic/ fatty acid alpha-hydroxylase
267318_at	1.3992	0.484606	1.61033	0.687354	11.2.2 lipid metabolism.FA desaturation.a hydroxylase	at2g34770	FAH1 (FATTY ACID HYDROXYLASE 1); catalytic/ fatty acid alpha-hydroxylase
266865_at	1.60992	0.686989	2.68753	1.42628	11.2.3 lipid metabolism.FA desaturation.omega 3 desaturase	at2g29980	FAD3 (FATTY ACID DESATURASE 3); omega-3 fatty acid desaturase
255549_at	2.00765	1.00551	4.45313	2.15482	11.3 lipid metabolism.Phospholipid synthesis	at4g01950	GPAT3 (GLYCEROL-3-PHOSPHATE ACYLTRANSFERASE 3); acyltransferase
255662_at	1.86609	0.900018	3.5463	1.82632	11.3 lipid metabolism.Phospholipid synthesis	at4g00400	GPAT8 (glycerol-3-phosphate acyltransferase 8); acyltransferase/ glycerol-3-phosphate O-acyltransferase
255692_at	1.57928	0.65927	3.33739	1.73872	11.3 lipid metabolism.Phospholipid synthesis	at4g00400	GPAT8 (glycerol-3-phosphate acyltransferase 8); acyltransferase/ glycerol-3-phosphate O-acyltransferase
259430_at	1.63642	0.710542	2.64591	1.40376	11.3 lipid metabolism.Phospholipid synthesis	at1g01610	GPAT4 (GLYCEROL-3-PHOSPHATE ACYLTRANSFERASE 4); 1-acylglycerol-3-phosphate O-acyltransferase/ acyltransferase
253362_s_at	1.39616	0.481465	2.34758	1.23118	11.3.10 lipid metabolism.Phospholipid synthesis.(S)-coclaurine-N-methyltransferase	MULTIPLE HITS	ATARD1 (ACIREDUCTONE DIOXYGENASE 1); acireductone dioxygenase [iron(II)-requiring]/ metal
251343_at	1.35367	0.43688	1.73503	0.79496	11.3.3 lipid metabolism.Phospholipid synthesis.phosphatidate cytidylyltransferase	at3g60620	phosphatidate cytidylyltransferase family protein
248050_at	2.02869	1.02055	4.33912	2.1174	11.4 lipid metabolism.TAG synthesis	at5g56100	glycine-rich protein / oleosin
245112_at	1.68709	0.754536	2.87504	1.52358	11.5.2 lipid metabolism.glyceral metabolism.Glycerol-3-phosphate dehydrogenase (NAD+)	at2g41540	GPDHC1; NAD or NADH binding / glycerol-3-phosphate dehydrogenase (NAD+)
249366_at	1.54874	0.631094	2.57353	1.36375	11.5.2 lipid metabolism.glyceral metabolism.Glycerol-3-phosphate dehydrogenase (NAD+)	at5g40610	glycerol-3-phosphate dehydrogenase (NAD+) / GPDH
258675_at	1.69561	0.761804	0.543586	-0.879419	11.6 lipid metabolism.lipid transfer proteins etc	at3g08770	LTP6; lipid binding
259592_at	1.98299	0.987681	4.4005	2.13767	11.6 lipid metabolism.lipid transfer proteins etc	at1g27950	LTPG1 (GLYCOSYLPHOSPHATIDYLINOSITOL-ANCHORED LIPID PROTEIN TRANSFER 1)
267382_at	1.33946	0.42165	2.02761	1.01978	11.6 lipid metabolism.lipid transfer proteins etc	at2g44300	lipid transfer protein-related
264523_at	1.36371	0.447532	1.94435	0.959291	11.8 lipid metabolism.'exotics'(steroids, squalene etc)	at1g10030	ERG28 (Arabidopsis homolog of yeast ergosterol28)
258467_at	1.36199	0.44572	2.27104	1.18335	11.8.1 lipid metabolism.'exotics' (steroids, squalene etc).sphingolipids	at3g06060	short-chain dehydrogenase/reductase (SDR) family protein
261492_at	1.2859	0.362782	2.757	1.4631	11.8.1 lipid metabolism.'exotics' (steroids, squalene etc).sphingolipids	at1g14290	SBH2 (SPHINGOID BASE HYDROXYLASE 2); catalytic/ sphingosine hydroxylase
266703_at	1.67933	0.747888	2.22763	1.15551	11.8.1.3 lipid metabolism.''exotics'' (steroids, squalene etc).sphingolipids.ceramide glucosyltransferase	at2g19880	ceramide glucosyltransferase, putative
251796_at	1.52357	0.60746	3.18373	1.67072	11.8.7 lipid metabolism.'exotics' (steroids, squalene etc).trans-2-enoyl-CoA reductase (NADPH)	at3g55360	CER10; 3-oxo-5-alpha-steroid 4-dehydrogenase/ fatty acid elongase/ trans-2-enoyl-CoA reductase (NADPH)
253254_at	1.36534	0.44926	1.72628	0.787667	11.8.8 lipid metabolism.'exotics' (steroids, squalene etc).squalene synthase	at4g34650	SQS2 (SQUALENE SYNTHASE 2); farnesyl-diphosphate farnesyltransferase
246124_at	1.35259	0.435726	1.88369	0.913558	11.9.3.2 lipid metabolism.lipid degradation.lysophospholipases.carboxylesterase	at5g20060	phospholipase/carboxylesterase family protein
261608_at	1.88776	0.916679	3.50437	1.80916	11.9.3.2 lipid metabolism.lipid degradation.lysophospholipases.carboxylesterase	at1g49650	cell death associated protein-related
248085_at	2.14128	1.09847	6.09577	2.60781	11.9.3.3 lipid metabolism.lipid degradation.lysophospholipases.glycerophosphodiester phosphodiesterase	at5g55480	SVL1 (SHV3-LIKE 1); glycerophosphodiester phosphodiesterase/ phosphoric diester hydrolase
250561_at	3.22718	1.69027	4.22931	2.08042	11.9.3.3 lipid metabolism.lipid degradation.lysophospholipases.glycerophosphodiester phosphodiesterase	at5g08030	glycerophosphoryl diester phosphodiesterase family protein
253925_at	1.93391	0.951523	5.56204	2.47561	11.9.3.3 lipid metabolism.lipid degradation.lysophospholipases.glycerophosphodiester phosphodiesterase	at4g26690	SHV3 (SHAVEN 3); glycerophosphodiester phosphodiesterase/ kinase
253492_at	1.81801	0.862358	2.03379	1.02417	11.9.4.3 lipid metabolism.lipid degradation.beta-oxidation.enoyl CoA hydratase AND 13.2.4.3 amino acid metabolism.degradation.branched chain group.valine	at4g31810	enoyl-CoA hydratase/isomerase family protein
245612_at	1.82506	0.867941	2.27962	1.18879	11.9.4.3 lipid metabolism.lipid degradation.beta-oxidation.enoyl CoA hydratase AND 13.2.6.3 amino acid metabolism.degradation.aromatic aa.tryptophan	at4g14440	HCD1 (3-HYDROXYACYL-COA DEHYDRATASE 1); carnitine racemase/ catalytic/ dodecenoyl-CoA delta-isomerase
247042_at	1.31938	0.399856	1.52371	0.607586	12.4 N-metabolism.misc	at5g67220	nitrogen regulation family protein
267151_at	1.32495	0.405933	1.97859	0.984473	13.1.1.2.1 amino acid metabolism.synthesis.central amino acid metabolism.aspartate.aspartate aminotransferase	at2g30970	ASP1 (ASPARTATE AMINOTRANSFERASE 1); L-aspartate
265965_at	1.35537	0.438683	1.84871	0.886516	13.1.2.3.2 amino acid metabolism.synthesis.glutamate family.arginine.acetylglutamate kinase	at2g37500	arginine biosynthesis protein ArgJ family
254134_at	1.30028	0.378823	2.13003	1.09087	13.1.2.3.22 amino acid metabolism.synthesis.glutamate family.arginine.arginosuccinate synthase	at4g24830	arginosuccinate synthase family
250403_at	1.44857	0.534626	3.44015	1.78247	13.1.2.3.23 amino acid metabolism.synthesis.glutamate family.arginine.argininosuccinate lyase	at5g10920	argininosuccinate lyase, putative / arginosuccinase, putative
250484_at	1.46577	0.551661	2.20199	1.13881	13.1.3.1.1 amino acid metabolism.synthesis.aspartate family.asparagine.asparagine synthetase	at5g10240	ASN3 (ASPARAGINE SYNTHETASE 3); asparagine synthase (glutamine-hydrolyzing)
253700_at	1.57962	0.659576	2.15943	1.11065	13.1.3.2.1 amino acid metabolism.synthesis.aspartate family.threonine.threonine synthase	at4g29840	MTO2 (METHIONINE OVER-ACCUMULATOR 2); threonine synthase
263838_at	1.31967	0.40018	1.49124	0.57651	13.1.3.4 amino acid metabolism.synthesis.aspartate family.methionine AND 15.2 metal handling.binding, chelation and storage	at2g36880	MAT3 (methionine adenosyltransferase 3); copper ion binding / methionine adenosyltransferase
245145_at	1.73509	0.795009	2.53022	1.33926	13.1.3.5.1 amino acid metabolism.synthesis.aspartate family.lysine.dihydrodipicolinate synthase	at2g45440	DHDPS2 (DIHYDRODIPICOLINATE SYNTHASE); catalytic/ dihydrodipicolinate synthase/ lyase
267237_s_at	2.25302	1.17186	8.08157	3.01464	13.1.3.5.2 amino acid metabolism.synthesis.aspartate family.lysine.dihydrodipicolinate reductase	MULTIPLE HITS	ATARD1 (ACIREDUCTONE DIOXYGENASE 1); acireductone dioxygenase [iron(II)-requiring]/ metal
253308_at	1.37425	0.458644	2.24729	1.16819	13.1.3.5.3 amino acid metabolism.synthesis.aspartate family.lysine.LL-diaminopimelic acid aminotransferase	at4g33680	AGD2 (ABERRANT GROWTH AND DEATH 2); L,L-diaminopimelate aminotransferase/ transaminase
251948_at	1.32703	0.408205	1.82611	0.86877	13.1.3.5.4 amino acid metabolism.synthesis.aspartate family.lysine.diaminopimelate epimerase	at3g53580	diaminopimelate epimerase family protein
258365_s_at	1.55221	0.634324	2.139	1.09694	13.1.3.5.5 amino acid metabolism.synthesis.aspartate family.lysine.diaminopimelate decarboxylase	MULTIPLE HITS	ATARD1 (ACIREDUCTONE DIOXYGENASE 1); acireductone dioxygenase [iron(II)-requiring]/ metal
254535_at	1.52092	0.604942	3.0778	1.6219	13.1.3.6.1.10 amino acid metabolism.synthesis.aspartate family.misc.homoserine.bifunctional aspartate kinase/homoserine dehydrogenase	at4g19710	bifunctional aspartate kinase/homoserine dehydrogenase, putative / AK-HSDH, putative
262841_at	1.51573	0.600012	5.2858	2.40212	13.1.3.6.1.2 amino acid metabolism.synthesis.aspartate family.misc.homoserine.aspartate semialdehyde dehydrogenase	at1g14810	semialdehyde dehydrogenase family protein
250111_at	1.47707	0.562739	1.80906	0.855243	13.1.4.1.1 amino acid metabolism.synthesis.branched chain group.common.acetolactate synthase	at5g16290	acetolactate synthase small subunit, putative
251536_at	1.32819	0.409465	2.7549	1.462	13.1.4.1.2 amino acid metabolism.synthesis.branched chain group.common.ketol-acid reductoisomerase	at3g58610	ketol-acid reductoisomerase
261668_at	1.34305	0.425517	1.8717	0.904349	13.1.4.4.1 amino acid metabolism.synthesis.branched chain group.leucine specific.2-isopropylmalate synthase	at1g18500	MAML-4 (METHYLTHIOALKYLMALATE SYNTHASE-LIKE 4); 2-isopropylmalate synthase
260285_at	1.44398	0.530049	4.04152	2.0149	13.1.4.4.3 amino acid metabolism.synthesis.branched chain group.leucine specific.3-isopropylmalate dehydrogenase AND 16.5.1.1.1.5 secondary metabolism.sulfur-containing.glucosinolates.synthesis.aliphatic.methylthioalkylmalate dehydrogenase (MAM-D)	at1g80560	3-isopropylmalate dehydrogenase, chloroplast, putative
263047_at	1.47767	0.563326	2.47251	1.30598	13.1.5.1.2 amino acid metabolism.synthesis.serine-glycine-cysteine group.serine.phosphoserine aminotransferase	at2g17630	phosphoserine aminotransferase, putative
259172_at	2.40452	1.26575	4.77529	2.25559	13.1.5.3.1 amino acid metabolism.synthesis.serine-glycine-cysteine group.cysteine.OASTL	at3g03630	CS26; cysteine synthase
266608_at	1.41521	0.50102	2.80397	1.48747	13.1.6.1.5 amino acid metabolism.synthesis.aromatic aa.chorismate.shikimate kinase	at2g35500	shikimate kinase-related
246627_s_at	1.31331	0.393204	1.91961	0.940811	13.1.6.1.6 amino acid metabolism.synthesis.aromatic aa.chorismate.5-enolpyruvylshikimate-3-phosphate synthase	MULTIPLE HITS	ATARD1 (ACIREDUCTONE DIOXYGENASE 1); acireductone dioxygenase [iron(II)-requiring]/ metal
245832_at	1.3345	0.416295	1.5213	0.605308	13.1.6.1.7 amino acid metabolism.synthesis.aromatic aa.chorismate.chorismate synthase	at1g48850	EMB1144 (embryo defective 1144); chorismate synthase
262825_at	1.32275	0.403543	1.49098	0.57626	13.1.6.3.1 amino acid metabolism.synthesis.aromatic aa.phenylalanine.arogenate dehydratase / prephenate dehydratase	at1g11790	ADT1 (arogenate dehydratase 1); arogenate dehydratase/ prephenate dehydratase
259486_at	1.30085	0.379452	1.69848	0.764244	13.1.6.4.2 amino acid metabolism.synthesis.aromatic aa.tyrosine.prephenate dehydrogenase	at1g15710	prephenate dehydrogenase family protein
259770_s_at	1.34147	0.423814	2.08477	1.05989	13.1.6.5.3 amino acid metabolism.synthesis.aromatic aa.tryptophan.phosphoribosyanthranilate isomerase	MULTIPLE HITS	ATARD1 (ACIREDUCTONE DIOXYGENASE 1); acireductone dioxygenase [iron(II)-requiring]/ metal
264673_at	1.41249	0.498239	2.30603	1.20541	13.1.7.1 amino acid metabolism.synthesis.histidine.ATP phosphoribosyl transferase	at1g09795	ATATP-PRT2 (ATP PHOSPHORIBOSYL TRANSFERASE 2); ATP phosphoribosyltransferase
246265_at	1.95521	0.967325	5.63617	2.49472	13.1.7.2 amino acid metabolism.synthesis.histidine.bifunctional phosphoribosyl-ATP diphosphatase and phosphoribosyl-AMP cyclohydrolase	at1g31860	AT-IE; phosphoribosyl-AMP cyclohydrolase/ phosphoribosyl-ATP diphosphatase
263902_at	1.58163	0.661414	2.52805	1.33803	13.1.7.3 amino acid metabolism.synthesis.histidine.phosphoribosyl-AMP cyclohydrolase	at2g36230	APG10 (ALBINO AND PALE GREEN 10); 1-(5-phosphoribosyl)-5-[(5-phosphoribosylamino)methylideneamino]imidazole-4-carboxamid
250226_at	1.39256	0.477738	1.57062	0.651333	13.2.2.1 amino acid metabolism.degradation.glutamate family.glutamine	at5g13780	GCN5-related N-acetyltransferase, putative
246594_at	1.34892	0.431802	1.48785	0.573233	13.2.2.3 amino acid metabolism.degradation.glutamate family.arginine	at5g14800	P5CR (PYRROLINE-5- CARBOXYLATE (P5C) REDUCTASE); pyrroline-5-carboxylate reductase
245356_at	1.43591	0.521964	1.48523	0.570682	13.2.3.4 amino acid metabolism.degradation.aspartate family.methionine	at4g13940	MEE58 (MATERNAL EFFECT EMBRYO ARREST 58); adenosylhomocysteinase/ copper ion binding
256361_at	1.73459	0.794595	2.44239	1.28829	13.2.3.4 amino acid metabolism.degradation.aspartate family.methionine	at1g66520	pde194 (pigment defective 194); catalytic/ formyltetrahydrofolate deformylase/ hydroxymethyl-, formyl- and related transferase
257173_at	2.05422	1.03859	4.32936	2.11415	13.2.3.4 amino acid metabolism.degradation.aspartate family.methionine	at3g23810	SAHH2 (S-ADENOSYL-L-HOMOCYSTEINE (SAH) HYDROLASE 2); adenosylhomocysteinase/ binding / catalytic
248526_at	1.76975	0.823544	4.21413	2.07524	15.2 metal handling.binding, chelation and storage	at5g50740	metal ion binding
248527_at	2.13305	1.09292	5.05954	2.33901	15.2 metal handling.binding, chelation and storage	at5g50740	metal ion binding
257058_at	1.35574	0.439085	1.5172	0.601407	15.2 metal handling.binding, chelation and storage	at3g15352	ATCOX17; copper chaperone
267377_at	1.7284	0.789435	2.65449	1.40843	16.1 secondary metabolism.isoprenoids	at2g26250	KCS10 (3-KETOACYL-COA SYNTHASE 10); acyltransferase/ catalytic/ transferase, transferring acyl groups other than amino-acy
246778_at	1.50726	0.591929	2.72085	1.44406	16.1.2.4 secondary metabolism.isoprenoids.mevalonate pathway.mevalonate kinase	at5g27450	MK (MEVALONATE KINASE); mevalonate kinase
245301_at	1.53323	0.616575	2.35337	1.23473	16.1.2.9 secondary metabolism.isoprenoids.mevalonate pathway.farnesyl pyrophosphate synthetase	at4g17190	FPS2 (FARNESYL DIPHOSPHATE SYNTHASE 2); dimethylallyltranstransferase/ geranyltranstransferase
248718_at	1.28019	0.356354	1.4544	0.540422	16.1.2.9 secondary metabolism.isoprenoids.mevalonate pathway.farnesyl pyrophosphate synthetase	at5g47770	FPS1 (FARNESYL DIPHOSPHATE SYNTHASE 1); dimethylallyltranstransferase/ geranyltranstransferase
252199_at	1.33877	0.420913	1.27083	0.345766	16.2 secondary metabolism.phenylpropanoids	at3g50270	transferase family protein
256186_at	1.46421	0.550122	1.99575	0.996934	16.2.1.3 secondary metabolism.phenylpropanoids.lignin biosynthesis.4CL	at1g51680	4CL1 (4-COUMARATE
261907_at	1.53126	0.614718	0.622743	-0.683292	16.2.1.3 secondary metabolism.phenylpropanoids.lignin biosynthesis.4CL	at1g65060	4CL3; 4-coumarate-CoA ligase
248639_at	1.54655	0.62905	2.24324	1.16559	16.2.1.4 secondary metabolism.phenylpropanoids.lignin biosynthesis.HCT	at5g48930	HCT (HYDROXYCINNAMOYL-COA SHIKIMATE/QUINATE HYDROXYCINNAMOYL TRANSFERASE); quinate O-hydroxycinnamoyltransferase/ shikimate O-hyd
253088_at	1.7303	0.791025	1.32755	0.408766	16.2.1.8 secondary metabolism.phenylpropanoids.lignin biosynthesis.F5H	at4g36220	FAH1 (FERULIC ACID 5-HYDROXYLASE 1); ferulate 5-hydroxylase/ monooxygenase
265058_s_at	2.75321	1.46111	1.76794	0.822071	16.5.1.3.1 secondary metabolism.sulfur-containing.glucosinolates.degradation.myrosinase AND 26.16 misc.myrosinases-lectin-jacalin	MULTIPLE HITS	ATARD1 (ACIREDUCTONE DIOXYGENASE 1); acireductone dioxygenase [iron(II)-requiring]/ metal
250794_at	1.76411	0.818937	0.344334	-1.53812	16.8.2 secondary metabolism.flavonoids.chalcones	at5g05270	chalcone-flavanone isomerase family protein
250207_at	1.5957	0.674186	0.480598	-1.0571	16.8.2.1 secondary metabolism.flavonoids.chalcones.naringenin-chalcone synthase	at5g13930	TT4 (TRANSPARENT TESTA 4); naringenin-chalcone synthase
245141_at	1.51971	0.6038	1.83729	0.877577	16.8.3.1 secondary metabolism.flavonoids.dihydroflavonols.dihydroflavonol 4-reductase	at2g45400	BEN1; binding / catalytic/ coenzyme binding / oxidoreductase, acting on CH-OH group of donors
253195_at	1.40909	0.494764	1.92311	0.943441	16.8.3.1 secondary metabolism.flavonoids.dihydroflavonols.dihydroflavonol 4-reductase	at4g35420	dihydroflavonol 4-reductase family / dihydrokaempferol 4-reductase family
250533_at	1.41217	0.497913	1.34556	0.428207	16.8.4.1 secondary metabolism.flavonoids.flavonols.flavonol synthase (FLS)	at5g08640	FLS (FLAVONOL SYNTHASE); flavonol synthase
261804_at	1.57224	0.652825	1.63412	0.708512	16.8.4.3 secondary metabolism.flavonoids.flavonols.flavonol-3-O-rhamnosyltransferase	at1g30530	UGT78D1 (UDP-GLUCOSYL TRANSFERASE 78D1); UDP-glycosyltransferase/ quercetin 3-O-glucosyltransferase/ transferase, transferrin
260955_at	1.71544	0.778581	1.57011	0.650866	16.8.8.2 secondary metabolism.flavonoids.flavonoid glycosylations.flavonol-3-O-glycoside-rhamnosyltransferase	at1g06000	UDP-glucoronosyl/UDP-glucosyl transferase family protein
246034_at	1.39107	0.476195	1.61331	0.690024	17.1.3 hormone metabolism.abscisic acid.induced-regulated-responsive-activated	at5g08350	GRAM domain-containing protein / ABA-responsive protein-related
249702_at	1.37185	0.456121	1.53782	0.620887	17.2.2 hormone metabolism.auxin.signal transduction	at5g35570	unknown protein
262263_at	1.6083	0.685535	1.91175	0.934897	17.2.2 hormone metabolism.auxin.signal transduction	at1g70940	PIN3 (PIN-FORMED 3); auxin
266300_at	1.81675	0.861363	4.37762	2.13015	17.2.2 hormone metabolism.auxin.signal transduction	at2g01420	PIN4 (PIN-FORMED 4); auxin
247186_at	1.38705	0.472016	1.44864	0.534694	17.2.3 hormone metabolism.auxin.induced-regulated-responsive-activated	at5g65470	unknown protein
248163_at	2.25676	1.17425	2.77938	1.47476	17.2.3 hormone metabolism.auxin.induced-regulated-responsive-activated	at5g54510	DFL1 (DWARF IN LIGHT 1); indole-3-acetic acid amido synthetase
259773_at	1.79727	0.845811	4.18014	2.06355	17.2.3 hormone metabolism.auxin.induced-regulated-responsive-activated	at1g29500	auxin-responsive protein, putative
266465_at	2.03787	1.02706	6.35167	2.66714	17.2.3 hormone metabolism.auxin.induced-regulated-responsive-activated	at2g47750	GH3.9 (PUTATIVE INDOLE-3-ACETIC ACID-AMIDO SYNTHETASE GH3.9)
252184_at	1.5355	0.618706	2.63736	1.3991	17.3.1.1.2 hormone metabolism.brassinosteroid.synthesis-degradation.BRs.DWF4	at3g50660	DWF4 (DWARF 4); steroid 22-alpha hydroxylase
250752_at	1.3687	0.452808	2.00524	1.00377	17.3.1.1.3 hormone metabolism.brassinosteroid.synthesis-degradation.BRs.CPD	at5g05690	CPD (CONSTITUTIVE PHOTOMORPHOGENIC DWARF); electron carrier/ heme binding / iron ion binding
255885_at	1.73401	0.794111	2.7316	1.44974	17.3.1.2.2 hormone metabolism.brassinosteroid.synthesis-degradation.sterols.SMT2	at1g20330	SMT2 (STEROL METHYLTRANSFERASE 2); S-adenosylmethionine-dependent methyltransferase
261727_at	2.61338	1.38592	2.24033	1.16371	17.3.1.2.2 hormone metabolism.brassinosteroid.synthesis-degradation.sterols.SMT2	at1g76090	SMT3 (STEROL METHYLTRANSFERASE 3); S-adenosylmethionine-dependent methyltransferase/ sterol 24-C-methyltransferase
257938_at	1.52608	0.609826	2.57489	1.36451	17.3.1.2.8 hormone metabolism.brassinosteroid.synthesis-degradation.sterols.DWF1	at3g19820	DWF1 (DWARF 1); calmodulin binding / catalytic
252890_at	1.43351	0.519554	1.51396	0.59833	17.3.2.1 hormone metabolism.brassinosteroid.signal transduction.BRI	at4g39400	BRI1 (BRASSINOSTEROID INSENSITIVE 1); kinase/ protein binding / protein heterodimerization/ protein ho
253579_at	2.26141	1.17722	12.1407	3.60178	17.3.2.99 hormone metabolism.brassinosteroid.signal transduction.other	at4g30610	BRS1 (BRI1 SUPPRESSOR 1); serine-type carboxypeptidase
263421_at	1.52662	0.61034	2.65017	1.40609	17.3.2.99 hormone metabolism.brassinosteroid.signal transduction.other AND 33.99 development.unspecified	at2g17230	EXL5 (EXORDIUM LIKE 5)
250753_at	1.44302	0.529089	4.30631	2.10645	17.4.1 hormone metabolism.cytokinin.synthesis-degradation	at5g05860	UGT76C2; UDP-glycosyltransferase/ cis-zeatin O-beta-D-glucosyltransferase/ cytokinin 7-beta-glucosyltransferase/ cytokinin 9-
246390_at	1.38416	0.469006	1.37184	0.456112	17.5.1.2 hormone metabolism.ethylene.synthesis-degradation.1-aminocyclopropane-1-carboxylate oxidase	at1g77330	1-aminocyclopropane-1-carboxylate oxidase, putative / ACC oxidase, putative
263467_at	1.41122	0.496948	2.0137	1.00985	17.5.3 hormone metabolism.ethylene.induced-regulated-responsive-activated	at2g31730	ethylene-responsive protein, putative
250358_at	1.39112	0.476242	1.64031	0.713971	17.6.3 hormone metabolism.gibberelin.induced-regulated-responsive-activated	at5g11740	AGP15 (ARABINOGALACTAN PROTEIN 15)
265389_at	1.50155	0.586456	2.17756	1.12271	18.3.2 Co-factor and vitamine metabolism.riboflavin.riboflavin synthase	at2g20690	lumazine-binding family protein
260548_at	1.44979	0.535845	3.07096	1.61869	18.6.1 Co-factor and vitamine metabolism.biotin.biotin synthase	at2g43360	BIO2 (BIOTIN AUXOTROPH 2); biotin synthase
256728_at	1.63944	0.713206	2.89189	1.53201	19.1 tetrapyrrole synthesis.glu-tRNA synthetase	at3g25660	glutamyl-tRNA(Gln) amidotransferase, putative
248920_at	1.5894	0.668478	7.05346	2.81833	19.10 tetrapyrrole synthesis.magnesium chelatase	at5g45930	CHLI2 (MAGNESIUM CHELATASE I2); ATPase/ magnesium chelatase
253871_at	1.33599	0.417906	7.47066	2.90124	19.14 tetrapyrrole synthesis.protochlorophyllide reductase	at4g27440	PORB (PROTOCHLOROPHYLLIDE OXIDOREDUCTASE B); oxidoreductase/ protochlorophyllide reductase
247392_at	1.33241	0.414034	2.67524	1.41967	19.3 tetrapyrrole synthesis.GSA	at5g63570	GSA1 (GLUTAMATE-1-SEMIALDEHYDE-2,1-AMINOMUTASE); glutamate-1-semialdehyde 2,1-aminomutase
257003_at	1.43012	0.516139	2.33285	1.22209	19.40 tetrapyrrole synthesis.regulation	at3g14110	FLU (FLUORESCENT IN BLUE LIGHT); binding
246033_at	1.70389	0.768833	6.41004	2.68033	19.5 tetrapyrrole synthesis.porphobilinogen deaminase	at5g08280	HEMC (HYDROXYMETHYLBILANE SYNTHASE); hydroxymethylbilane synthase
255826_at	1.44944	0.535494	5.20968	2.38119	19.7 tetrapyrrole synthesis.uroporphyrinogen decarboxylase	at2g40490	HEME2; uroporphyrinogen decarboxylase
257219_at	1.77796	0.830222	6.00401	2.58593	19.7 tetrapyrrole synthesis.uroporphyrinogen decarboxylase	at3g14930	HEME1; uroporphyrinogen decarboxylase
251935_at	1.75857	0.814406	3.07264	1.61948	2.2.1.1 major CHO metabolism.degradation.sucrose.fructokinase	at3g54090	pfkB-type carbohydrate kinase family protein
260343_at	3.03843	1.60333	6.09583	2.60782	2.2.1.1 major CHO metabolism.degradation.sucrose.fructokinase	at1g69200	kinase
259519_at	1.52366	0.60754	1.79948	0.847583	20 stress	at1g12270	stress-inducible protein, putative
252954_at	1.94547	0.960119	3.07037	1.61841	20.1 stress.biotic	at4g38660	thaumatin, putative
254024_at	2.19428	1.13375	2.03844	1.02746	20.1 stress.biotic	at4g25780	pathogenesis-related protein, putative
259987_at	1.982	0.986959	3.34527	1.74212	20.1 stress.biotic	at1g75030	ATLP-3
260560_at	1.76694	0.821252	2.12583	1.08802	20.1 stress.biotic	at2g43590	chitinase, putative
261279_at	1.3183	0.398674	1.5927	0.671476	20.1 stress.biotic	at1g05850	POM1 (POM-POM1); chitinase
266119_at	2.1622	1.1125	5.01971	2.3276	20.1 stress.biotic	at2g02100	LCR69 (LOW-MOLECULAR-WEIGHT CYSTEINE-RICH 69); peptidase inhibitor
247116_at	1.36746	0.451499	1.62906	0.704041	20.1.3.1 stress.biotic.signalling.MLO-like	at5g65970	MLO10 (MILDEW RESISTANCE LOCUS O 10); calmodulin binding
255059_at	1.4075	0.493135	1.56421	0.645436	20.1.7 stress.biotic.PR-proteins	at4g09420	disease resistance protein (TIR-NBS class), putative
260455_at	1.32322	0.404052	1.22304	0.290472	20.1.7.6.1 stress.biotic.PR-proteins.proteinase inhibitors.trypsin inhibitor	at1g72500	inter-alpha-trypsin inhibitor heavy chain-related
245176_at	1.70484	0.769637	3.10287	1.6336	20.2.1 stress.abiotic.heat	at2g47440	DNAJ heat shock N-terminal domain-containing protein
248045_at	1.43092	0.516947	1.69167	0.758445	20.2.1 stress.abiotic.heat	at5g56030	HSP81-2 (HEAT SHOCK PROTEIN 81-2); ATP binding
248582_at	1.36969	0.453852	2.74666	1.45768	20.2.1 stress.abiotic.heat	at5g49910	CPHSC70-2EAT SHOCK PROTEIN 70-2 (CHLOROPLAST HEAT SHOCK PROTEIN 70-2); ATP binding / unfolde
249193_at	1.25335	0.325784	1.42019	0.506079	20.2.1 stress.abiotic.heat	at5g42480	ARC6 (ACCUMULATION AND REPLICATION OF CHLOROPLASTS 6); protein binding
252828_at	1.62958	0.7045	2.14688	1.10224	20.2.1 stress.abiotic.heat	at4g39960	DNAJ heat shock family protein
253013_at	1.51669	0.600923	1.57083	0.651525	20.2.1 stress.abiotic.heat	at4g37910	mtHsc70-1 (mitochondrial heat shock protein 70-1); ATP binding
258220_at	1.48971	0.575028	1.59958	0.677694	20.2.1 stress.abiotic.heat	at3g17830	DNAJ heat shock family protein
262054_s_at	1.7063	0.77087	1.33676	0.418745	20.2.1 stress.abiotic.heat	MULTIPLE HITS	ATARD1 (ACIREDUCTONE DIOXYGENASE 1); acireductone dioxygenase [iron(II)-requiring]/ metal
263150_at	1.50956	0.594131	1.89647	0.923314	20.2.1 stress.abiotic.heat	at1g54050	17.4 kDa class III heat shock protein (HSP17.4-CIII)
263483_at	1.77001	0.823762	1.73608	0.795834	20.2.1 stress.abiotic.heat	at2g04030	CR88; ATP binding
264427_at	1.26494	0.339068	1.69822	0.764025	20.2.1 stress.abiotic.heat	at1g61770	DNAJ heat shock N-terminal domain-containing protein
252957_at	1.514	0.598369	2.69419	1.42985	20.2.2 stress.abiotic.cold	at4g38680	GRP2 (GLYCINE RICH PROTEIN 2); double-stranded DNA binding / mRNA binding / nucleic acid binding / single-s
253129_at	1.69972	0.765293	2.21451	1.14699	20.2.2 stress.abiotic.cold	at4g36020	CSDP1 (cold shock domain protein 1); RNA binding / double-stranded DNA binding / nucleic acid binding / single-stranded DNA bin
263495_at	1.95987	0.970759	2.55286	1.35211	20.2.2 stress.abiotic.cold	at2g42530	COR15B (COLD REGULATED 15B)
265480_at	1.3966	0.481919	1.48899	0.574339	20.2.2 stress.abiotic.cold	at2g15970	COR413-PM1
245274_at	1.28208	0.358488	1.82631	0.868934	20.2.3 stress.abiotic.drought/salt	at4g14360	dehydration-responsive protein-related
256310_at	1.4518	0.537843	1.92473	0.944655	20.2.3 stress.abiotic.drought/salt	at1g30360	ERD4 (early-responsive to dehydration 4)
258735_at	1.84478	0.883446	2.37969	1.25077	20.2.3 stress.abiotic.drought/salt	at3g05880	RCI2A (RARE-COLD-INDUCIBLE 2A)
258751_at	2.72196	1.44465	2.80619	1.48861	20.2.3 stress.abiotic.drought/salt	at3g05890	RCI2B (RARE-COLD-INDUCIBLE 2B)
263662_at	1.77739	0.829758	2.46163	1.29961	20.2.3 stress.abiotic.drought/salt	at1g04430	dehydration-responsive protein-related
263692_at	1.35508	0.438378	1.56222	0.643594	20.2.3 stress.abiotic.drought/salt	at1g26850	dehydration-responsive family protein
267040_at	1.35662	0.440021	2.08537	1.0603	20.2.3 stress.abiotic.drought/salt	at2g34300	dehydration-responsive protein-related
247075_at	1.33731	0.419335	1.99957	0.999688	21.1 redox.thioredoxin	at5g66410	PLP3b (Phosducin-like protein 3 homolog); beta-tubulin binding
258534_at	1.43627	0.522332	2.53372	1.34126	21.1 redox.thioredoxin	at3g06730	thioredoxin family protein
253899_at	1.67859	0.747251	2.93919	1.55542	21.1.1 redox.thioredoxin.PDIL	at4g27080	thioredoxin family protein
245392_at	2.11357	1.07968	11.9271	3.57617	21.4 redox.glutaredoxins	at4g15680	glutaredoxin family protein
260831_at	1.91703	0.938872	5.74958	2.52346	21.4 redox.glutaredoxins	at1g06830	glutaredoxin family protein
248493_at	1.7666	0.820976	4.20197	2.07106	21.6 redox.dismutases and catalases	at5g51100	FSD2 (FE SUPEROXIDE DISMUTASE 2); superoxide dismutase
249826_at	1.76141	0.816732	3.43954	1.78221	21.6 redox.dismutases and catalases	at5g23310	FSD3 (FE SUPEROXIDE DISMUTASE 3); superoxide dismutase
256002_at	1.55493	0.636849	1.76043	0.815926	23.1.1.1 nucleotide metabolism.synthesis.pyrimidine.carbamoyl phosphate synthetase	at1g29900	CARB (CARBAMOYL PHOSPHATE SYNTHETASE B); ATP binding / carbamoyl-phosphate synthase/ catalytic
258243_at	1.66498	0.735507	2.62579	1.39275	23.1.1.1 nucleotide metabolism.synthesis.pyrimidine.carbamoyl phosphate synthetase	at3g27740	CARA (CARBAMOYL PHOSPHATE SYNTHETASE A); carbamoyl-phosphate synthase (glutamine-hydrolyzing)/ carbamoyl-phosphate synthase/ cat
257702_at	1.64324	0.716544	2.09318	1.0657	23.1.1.10 nucleotide metabolism.synthesis.pyrimidine.CTP synthetase	at3g12670	emb2742 (embryo defective 2742); CTP synthase/ catalytic
249830_at	1.81507	0.860028	1.77294	0.82614	23.1.1.4 nucleotide metabolism.synthesis.pyrimidine.dihydroorotate dehydrogenase	at5g23300	PYRD (pyrimidine d); dihydroorotate dehydrogenase
253252_at	1.42293	0.508869	2.31872	1.21333	23.1.2.1 nucleotide metabolism.synthesis.purine.amidophosphoribosyltransferase	at4g34740	ATASE2 (GLN PHOSPHORIBOSYL PYROPHOSPHATE AMIDOTRANSFERASE 2); amidophosphoribosyltransferase
251599_at	1.31297	0.392835	1.93418	0.951725	23.1.2.20 nucleotide metabolism.synthesis.purine.adenylosuccinate synthase	at3g57610	ADSS (ADENYLOSUCCINATE SYNTHASE); adenylosuccinate synthase
262754_at	1.34205	0.424436	1.94942	0.963043	23.1.2.30 nucleotide metabolism.synthesis.purine.IMP dehydrogenase	at1g16350	inosine-5'-monophosphate dehydrogenase, putative
260294_at	1.97535	0.982105	2.39323	1.25896	23.1.2.31 nucleotide metabolism.synthesis.purine.GMP synthetase	at1g63660	GMP synthase (glutamine-hydrolyzing), putative / glutamine amidotransferase, putative
260250_at	1.4902	0.575511	1.96988	0.978111	23.1.2.4 nucleotide metabolism.synthesis.purine.FGAR amidotransferase	at1g74260	PUR4 (purine biosynthesis 4); ATP binding / catalytic/ phosphoribosylformylglycinamidine synthase
251830_at	1.65579	0.72752	2.36482	1.24173	23.1.2.5 nucleotide metabolism.synthesis.purine.AIR synthase	at3g55010	PUR5; ATP binding / phosphoribosylformylglycinamidine cyclo-ligase
267162_s_at	2.41072	1.26946	2.8914	1.53177	23.1.2.6 nucleotide metabolism.synthesis.purine.AIR carboxylase	MULTIPLE HITS	ATARD1 (ACIREDUCTONE DIOXYGENASE 1); acireductone dioxygenase [iron(II)-requiring]/ metal
256978_at	1.48604	0.571476	1.40589	0.491484	23.1.2.7 nucleotide metabolism.synthesis.purine.SAICAR synthetase	at3g21110	PUR7 (PURIN 7); phosphoribosylaminoimidazolesuccinocarboxamide synthase
267421_at	2.23974	1.16333	3.81051	1.92999	23.1.2.9 nucleotide metabolism.synthesis.purine.AICAR transformylase	at2g35040	AICARFT/IMPCHase bienzyme family protein
249979_s_at	1.44306	0.529136	1.51916	0.603272	23.2 nucleotide metabolism.degradation	MULTIPLE HITS	ATARD1 (ACIREDUCTONE DIOXYGENASE 1); acireductone dioxygenase [iron(II)-requiring]/ metal
250034_at	1.59949	0.677612	1.88627	0.915537	23.2 nucleotide metabolism.degradation	at5g18280	ATAPY2 (ARABIDOPSIS THALIANA APYRASE 2); ATPase/ nucleotide diphosphatase
256341_at	1.84871	0.88652	2.10374	1.07296	23.3 nucleotide metabolism.salvage	at1g72040	deoxynucleoside kinase family
250413_at	2.46162	1.29961	4.62574	2.20968	23.3.1.1 nucleotide metabolism.salvage.phosphoribosyltransferases.aprt	at5g11160	APT5 (Adenine phosphoribosyltransferase 5); adenine phosphoribosyltransferase
251920_at	1.71339	0.77685	4.54664	2.1848	23.3.1.3 nucleotide metabolism.salvage.phosphoribosyltransferases.upp	at3g53900	uracil phosphoribosyltransferase, putative / UMP pyrophosphorylase, putative / UPRTase, putative
258658_at	1.51544	0.599737	3.35272	1.74533	23.3.2.1 nucleotide metabolism.salvage.nucleoside kinases.adenosine kinase	at3g09820	ADK1 (adenosine kinase 1); adenosine kinase/ copper ion binding
249874_at	1.78016	0.832006	2.20323	1.13962	23.3.2.3 nucleotide metabolism.salvage.nucleoside kinases.thymidine kinase	at5g23070	thymidine kinase, putative
247382_at	1.25663	0.329558	2.38542	1.25424	23.4.1 nucleotide metabolism.phosphotransfer and pyrophosphatases.adenylate kinase	at5g63400	ADK1 (ADENYLATE KINASE 1); ATP binding / adenylate kinase/ nucleobase, nucleoside, nucleotide kinase/ nucleotide kinase/ phospho
258998_at	1.55225	0.634358	1.76279	0.817858	23.4.1 nucleotide metabolism.phosphotransfer and pyrophosphatases.adenylate kinase	at3g01820	adenylate kinase family protein
265958_at	1.42856	0.514565	1.7605	0.815985	23.4.1 nucleotide metabolism.phosphotransfer and pyrophosphatases.adenylate kinase	at2g37250	ADK (ADENOSINE KINASE); adenylate kinase/ nucleotide kinase
257756_at	1.67499	0.744151	3.60029	1.84811	23.4.3 nucleotide metabolism.phosphotransfer and pyrophosphatases.uridylate kinase	at3g18680	aspartate/glutamate/uridylate kinase family protein
251639_at	1.52038	0.60443	2.80044	1.48565	23.4.99 nucleotide metabolism.phosphotransfer and pyrophosphatases.misc	at3g57560	aspartate/glutamate/uridylate kinase family protein
250181_at	1.27455	0.349991	1.29549	0.373497	23.5.2 nucleotide metabolism.deoxynucleotide metabolism.pseudouridine synthase AND 29.1.30 protein.aa activation.pseudouridylate synthase	at5g14460	pseudouridine synthase/ transporter
263882_at	1.62485	0.700304	6.00158	2.58534	23.5.4 nucleotide metabolism.deoxynucleotide metabolism.ribonucleoside-diphosphate reductase	at2g21790	RNR1 (RIBONUCLEOTIDE REDUCTASE 1); ATP binding / protein binding / ribonucleoside-diphosphate reductase
252442_at	1.6737	0.743039	3.80134	1.92651	23.5.5 nucleotide metabolism.deoxynucleotide metabolism.dUTP diphosphatase	at3g46940	deoxyuridine 5'-triphosphate nucleotidohydrolase family
262338_at	1.27927	0.355324	1.28478	0.361516	24.2 Biodegradation of Xenobiotics.lactoylglutathione lyase	at1g64185	lactoylglutathione lyase family protein / glyoxalase I family protein
253558_at	1.61842	0.694587	1.4783	0.563937	25 C1-metabolism	at4g31120	SKB1 (SHK1 BINDING PROTEIN 1); protein methyltransferase
254740_s_at	1.57111	0.651786	2.79136	1.48097	25.1 C1-metabolism.glycine hydroxymethyltransferase	MULTIPLE HITS	ATARD1 (ACIREDUCTONE DIOXYGENASE 1); acireductone dioxygenase [iron(II)-requiring]/ metal
255685_s_at	1.7889	0.839069	2.44915	1.29228	25.5 C1-metabolism.Methylenetetrahydrofolate dehydrogenase & Methenyltetrahydrofolate cyclohydrolase	MULTIPLE HITS	ATARD1 (ACIREDUCTONE DIOXYGENASE 1); acireductone dioxygenase [iron(II)-requiring]/ metal
250146_at	1.35391	0.437133	2.03247	1.02324	26.1 misc.misc2	at5g14660	PDF1B (PEPTIDE DEFORMYLASE 1B); iron ion binding / peptide deformylase
256134_at	1.32158	0.402268	1.32592	0.40699	26.1 misc.misc2	at1g13560	AAPT1 (AMINOALCOHOLPHOSPHOTRANSFERASE 1); phosphatidyltransferase/ phosphotransferase, for other substituted phosphate
262573_at	1.44348	0.529551	2.58074	1.36779	26.1 misc.misc2	at1g15390	PDF1A (PEPTIDE DEFORMYLASE 1A); peptide deformylase
255690_at	1.73004	0.790809	1.86777	0.901319	26.10 misc.cytochrome P450	at4g00360	CYP86A2 (CYTOCHROME P450 86 A2); fatty acid (omega-1)-hydroxylase/ oxygen binding
261574_at	1.92627	0.945814	7.53138	2.91291	26.10 misc.cytochrome P450	at1g01190	CYP78A8; electron carrier/ heme binding / iron ion binding / monooxygenase/ oxygen binding
266921_at	1.65155	0.723825	2.79847	1.48464	26.10 misc.cytochrome P450	at2g45970	CYP86A8; fatty acid (omega-1)-hydroxylase/ oxygen binding
256578_at	1.79108	0.84083	3.82822	1.93667	26.12 misc.peroxidases	at3g28200	peroxidase, putative
262830_at	1.75226	0.809215	3.63443	1.86173	26.13 misc.acid and other phosphatases	at1g14700	PAP3 (PURPLE ACID PHOSPHATASE 3); acid phosphatase/ protein serine/threonine phosphatase
265042_at	2.4835	1.31237	11.4469	3.51689	26.13 misc.acid and other phosphatases	at1g04040	acid phosphatase class B family protein
264299_s_at	2.0997	1.07018	4.49195	2.16734	26.16 misc.myrosinases-lectin-jacalin	MULTIPLE HITS	ATARD1 (ACIREDUCTONE DIOXYGENASE 1); acireductone dioxygenase [iron(II)-requiring]/ metal
257045_at	1.46542	0.551311	1.62639	0.701671	26.17 misc.dynamin	at3g19720	ARC5 (ACCUMULATION AND REPLICATION OF CHLOROPLAST 5); GTP binding / GTPase
247246_at	1.66801	0.738127	2.76828	1.46899	26.18 misc.invertase/pectin methylesterase inhibitor family protein	at5g64620	C/VIF2 (CELL WALL / VACUOLAR INHIBITOR OF FRUCTOSIDASE 2); enzyme inhibitor/ pectinesterase/ pectinesterase inhibito
254110_at	1.45623	0.542237	1.91968	0.940867	26.18 misc.invertase/pectin methylesterase inhibitor family protein	at4g25260	invertase/pectin methylesterase inhibitor family protein
264898_at	1.79045	0.840324	4.07029	2.02513	26.18 misc.invertase/pectin methylesterase inhibitor family protein	at1g23205	invertase/pectin methylesterase inhibitor family protein
250110_at	1.81098	0.856773	8.66603	3.11537	26.19 misc.plastocyanin-like	at5g15350	plastocyanin-like domain-containing protein
253875_at	1.78619	0.836884	4.62698	2.21007	26.19 misc.plastocyanin-like	at4g27520	plastocyanin-like domain-containing protein
257093_at	1.47213	0.557905	1.4275	0.513486	26.19 misc.plastocyanin-like	at3g20570	plastocyanin-like domain-containing protein
261975_at	1.34293	0.425389	2.40209	1.26429	26.19 misc.plastocyanin-like	at1g64640	plastocyanin-like domain-containing protein
247470_at	1.6044	0.682036	1.9086	0.932514	26.2 misc.UDP glucosyl and glucoronyl transferases	at5g62220	exostosin family protein
260222_at	1.34603	0.428711	1.28771	0.364804	26.2 misc.UDP glucosyl and glucoronyl transferases	at1g74380	XXT5 (XYLOGLUCAN XYLOSYLTRANSFERASE 5); transferase/ transferase, transferring glycosyl groups / xyloglucan 6-xylosyltransferase
264704_at	1.70579	0.770436	4.88621	2.28872	26.2 misc.UDP glucosyl and glucoronyl transferases	at1g70090	LGT8 (GLUCOSYL TRANSFERASE FAMILY 8); polygalacturonate 4-alpha-galacturonosyltransferase/ transferase, transferring glyc
264857_at	1.53425	0.617534	3.18614	1.67181	26.2 misc.UDP glucosyl and glucoronyl transferases	at1g24170	LGT9; polygalacturonate 4-alpha-galacturonosyltransferase/ transferase, transferring glycosyl groups / transferase, trans
247268_at	1.65409	0.726042	2.20795	1.14271	26.21 misc.protease inhibitor/seed storage/lipid transfer protein (LTP) family protein	at5g64080	protease inhibitor/seed storage/lipid transfer protein (LTP) family protein
248683_at	4.73812	2.24431	30.7054	4.94042	26.21 misc.protease inhibitor/seed storage/lipid transfer protein (LTP) family protein	at5g48490	protease inhibitor/seed storage/lipid transfer protein (LTP) family protein
252711_at	1.49503	0.580176	2.86002	1.51603	26.21 misc.protease inhibitor/seed storage/lipid transfer protein (LTP) family protein	at3g43720	protease inhibitor/seed storage/lipid transfer protein (LTP) family protein
264371_at	1.30048	0.379041	8.412	3.07245	26.21 misc.protease inhibitor/seed storage/lipid transfer protein (LTP) family protein	at1g12090	ELP (EXTENSIN-LIKE PROTEIN); lipid binding
265656_at	1.50003	0.584993	4.14794	2.05239	26.21 misc.protease inhibitor/seed storage/lipid transfer protein (LTP) family protein	at2g13820	protease inhibitor/seed storage/lipid transfer protein (LTP) family protein
253860_at	1.29653	0.374658	2.21841	1.14953	26.23 misc.rhodanese	at4g27700	rhodanese-like domain-containing protein
257909_at	1.65186	0.724095	3.4037	1.7671	26.23 misc.rhodanese	at3g25480	rhodanese-like domain-containing protein
248921_at	2.20297	1.13945	8.15597	3.02786	26.28 misc.GDSL-motif lipase	at5g45950	GDSL-motif lipase/hydrolase family protein
253736_at	4.09504	2.03388	11.7857	3.55896	26.28 misc.GDSL-motif lipase	at4g28780	GDSL-motif lipase/hydrolase family protein
259375_at	1.96326	0.973253	6.5041	2.70135	26.28 misc.GDSL-motif lipase	at3g16370	GDSL-motif lipase/hydrolase family protein
259786_at	1.88461	0.914265	6.11914	2.61333	26.28 misc.GDSL-motif lipase	at1g29660	GDSL-motif lipase/hydrolase family protein
259788_at	1.57433	0.654735	4.31632	2.1098	26.28 misc.GDSL-motif lipase	at1g29670	GDSL-motif lipase/hydrolase family protein
246324_at	1.36384	0.447672	1.33738	0.419406	26.3 misc.gluco-, galacto- and mannosidases	at1g16610	SR45; RNA binding / protein binding
262230_at	1.39788	0.483241	2.46867	1.30373	26.3.1 misc.gluco-, galacto- and mannosidases.alpha-galactosidase	at1g68560	XYL1 (ALPHA-XYLOSIDASE 1); alpha-N-arabinofuranosidase/ hydrolase, hydrolyzing O-glycosyl compounds / xylan 1,4-beta-xyl
247348_at	1.48107	0.566641	2.73067	1.44926	26.3.2 misc.gluco-, galacto- and mannosidases.beta-galactosidase	at5g63810	BGAL10 (beta-galactosidase 10); beta-galactosidase/ catalytic/ cation binding
253090_at	1.51964	0.603729	1.82153	0.86515	26.3.2 misc.gluco-, galacto- and mannosidases.beta-galactosidase	at4g36360	BGAL3 (beta-galactosidase 3); beta-galactosidase/ catalytic/ cation binding / sugar binding
259736_at	1.46042	0.546383	1.5391	0.622084	26.3.4 misc.gluco-, galacto- and mannosidases.endoglucanase	at1g64390	AtGH9C2 (Arabidopsis thaliana glycosyl hydrolase 9C2); carbohydrate binding / catalytic/ hydrolase, hydrolyzing O-glycosyl co
260181_at	1.42321	0.509147	1.9404	0.956352	26.3.4 misc.gluco-, galacto- and mannosidases.endoglucanase	at1g70710	ATGH9B1 (ARABIDOPSIS THALIANA GLYCOSYL HYDROLASE 9B1); cellulase/ hydrolase, hydrolyzing O-glycosyl compounds
247826_at	1.32563	0.406675	1.81524	0.860157	26.4 misc.beta 1,3 glucan hydrolases	at5g58480	glycosyl hydrolase family 17 protein
249718_at	1.50358	0.5884	6.11379	2.61207	26.4 misc.beta 1,3 glucan hydrolases	at5g35740	glycosyl hydrolase family protein 17
255779_at	1.47765	0.563308	2.51009	1.32774	26.4 misc.beta 1,3 glucan hydrolases	at1g18650	PDCB3 (PLASMODESMATA CALLOSE-BINDING PROTEIN 3); callose binding / polysaccharide binding
247845_at	1.65985	0.731056	1.32618	0.407274	26.4.1 misc.beta 1,3 glucan hydrolases.glucan endo-1,3-beta-glucosidase	at5g58090	glycosyl hydrolase family 17 protein
247963_at	1.35576	0.439106	1.35205	0.435146	26.4.1 misc.beta 1,3 glucan hydrolases.glucan endo-1,3-beta-glucosidase	at5g56590	glycosyl hydrolase family 17 protein
249235_at	1.48751	0.5729	2.08027	1.05677	26.4.1 misc.beta 1,3 glucan hydrolases.glucan endo-1,3-beta-glucosidase	at5g42100	ATBG_PAP; glucan endo-1,3-beta-D-glucosidase/ hydrolase, hydrolyzing O-glycosyl compounds
259014_at	1.59981	0.677898	2.97626	1.5735	26.4.1 misc.beta 1,3 glucan hydrolases.glucan endo-1,3-beta-glucosidase	at3g07320	glycosyl hydrolase family 17 protein
260282_at	1.60584	0.683325	2.71381	1.44032	26.5 misc.acyl transferases	at1g80410	EMB2753 (EMBRYO DEFECTIVE 2753); binding
253490_at	1.62913	0.704101	1.64431	0.717485	26.6 misc.O-methyl transferases	at4g31790	diphthine synthase, putative (DPH5)
253695_at	1.41674	0.502574	1.46213	0.548067	26.6 misc.O-methyl transferases	at4g29510	PRMT11 (ARGININE METHYLTRANSFERASE 11); protein-arginine N-methyltransferase
256288_at	1.99008	0.99283	2.99836	1.58417	26.6 misc.O-methyl transferases	at3g12270	PRMT3 (PROTEIN ARGININE METHYLTRANSFERASE 3); methyltransferase/ zinc ion binding
261130_at	1.42607	0.512041	2.31987	1.21404	26.6 misc.O-methyl transferases	at1g04870	PRMT10; [myelin basic protein]-arginine N-methyltransferase/ histone-arginine N-methyltransferase/ methyltransferase
266687_at	2.07989	1.05651	2.51203	1.32886	26.6 misc.O-methyl transferases	at2g19670	PRMT1A (PROTEIN ARGININE METHYLTRANSFERASE 1A); protein-arginine N-methyltransferase
246573_at	3.53421	1.82139	7.17812	2.84361	26.7 misc.oxidases - copper, flavone etc	at1g31690	amine oxidase/ copper ion binding / quinone binding
246603_at	2.879	1.52557	11.3075	3.49921	26.7 misc.oxidases - copper, flavone etc	at1g31690	amine oxidase/ copper ion binding / quinone binding
247069_at	1.52446	0.608299	2.7249	1.4462	26.7 misc.oxidases - copper, flavone etc	at5g66920	sks17 (SKU5 Similar 17); copper ion binding / oxidoreductase
254363_at	1.97018	0.978325	5.31088	2.40895	26.7 misc.oxidases - copper, flavone etc	at4g22010	sks4 (SKU5 Similar 4); copper ion binding / oxidoreductase
262376_at	1.76806	0.822167	4.80197	2.26363	26.8 misc.nitrilases, *nitrile lyases, berberine bridge enzymes, reticuline oxidases, troponine reductases	at1g72970	HTH (HOTHEAD); FAD binding / aldehyde-lyase/ mandelonitrile lyase
266280_at	1.67591	0.744944	1.82884	0.870926	26.8 misc.nitrilases, *nitrile lyases, berberine bridge enzymes, reticuline oxidases, troponine reductases	at2g29260	tropinone reductase, putative / tropine dehydrogenase, putative
264436_at	1.61865	0.694791	1.94081	0.956662	26.9 misc.glutathione S transferases	at1g10370	ERD9 (EARLY-RESPONSIVE TO DEHYDRATION 9); glutathione transferase
245085_at	1.90404	0.929063	5.24018	2.38962	27.1 RNA.processing	at2g23350	PAB4 (POLY(A) BINDING PROTEIN 4); RNA binding / translation initiation factor
245578_at	1.37671	0.46123	1.51635	0.600602	27.1 RNA.processing	at4g14790	ATSUV3; ATP-dependent RNA helicase
246152_at	1.61952	0.695568	3.00177	1.58581	27.1 RNA.processing	at5g20040	ATIPT9; ATP binding / tRNA isopentenyltransferase
246852_at	1.40394	0.489481	1.73731	0.796859	27.1 RNA.processing	at5g26880	tRNA/rRNA methyltransferase (SpoU) family protein
250137_at	1.36412	0.447972	1.63805	0.711978	27.1 RNA.processing	at5g15390	tRNA/rRNA methyltransferase (SpoU) family protein
250410_at	1.34119	0.423517	1.28222	0.35864	27.1 RNA.processing	at5g11010	pre-mRNA cleavage complex-related
253668_at	1.34788	0.430697	1.76941	0.823266	27.1 RNA.processing	at4g30220	RUXF (SMALL NUCLEAR RIBONUCLEOPROTEIN F)
253777_at	1.69179	0.758549	1.54504	0.627647	27.1 RNA.processing	at4g28450	nucleotide binding / protein binding
254475_at	1.79516	0.844113	2.39943	1.26269	27.1 RNA.processing	at4g20440	smB (small nuclear ribonucleoprotein associated protein B)
259344_at	1.86034	0.895567	3.71128	1.89192	27.1 RNA.processing	at3g03710	RIF10 (resistant to inhibition with FSM 10); 3'-5'-exoribonuclease/ RNA binding / nucleic acid binding / polyribonucleotide nuc
261614_at	2.18612	1.12837	4.91764	2.29797	27.1 RNA.processing	at1g49760	PAB8 (POLY(A) BINDING PROTEIN 8); RNA binding / translation initiation factor
261652_at	1.27524	0.350772	1.68295	0.750995	27.1 RNA.processing	at1g01860	PFC1 (PALEFACE 1); mRNA (2'-O-methyladenosine-N6-)-methyltransferase
264418_at	1.36359	0.447406	1.89278	0.920505	27.1 RNA.processing	at1g43190	polypyrimidine tract-binding protein, putative / heterogeneous nuclear ribonucleoprotein, putative
266074_at	1.71681	0.779733	2.45924	1.29821	27.1 RNA.processing	at2g18740	small nuclear ribonucleoprotein E, putative / snRNP-E, putative / Sm protein E, putative
267312_at	1.53307	0.616422	1.6904	0.757365	27.1 RNA.processing	at2g34750	RNA polymerase I specific transcription initiation factor RRN3 family protein
248362_at	1.44452	0.530593	1.69785	0.763707	27.1 RNA.processing AND 29.2.2.3.3 protein.synthesis.ribosome biogenesis.Pre-rRNA processing and modifications.methylotransferases	at5g52470	FIB1 (FIBRILLARIN 1); snoRNA binding
252256_at	1.5004	0.58535	1.65396	0.725924	27.1.1 RNA.processing.splicing	at3g49430	SRp34a (Ser/Arg-rich protein 34a); RNA binding / nucleic acid binding / nucleotide binding
253536_at	1.54893	0.631272	1.31174	0.391482	27.1.1 RNA.processing.splicing	at4g31580	SRZ-22; protein binding
254073_at	1.36034	0.443972	1.3321	0.413703	27.1.1 RNA.processing.splicing	at4g25500	ATRSP35; RNA binding / nucleic acid binding / nucleotide binding
255501_at	1.97435	0.981381	2.46799	1.30334	27.1.1 RNA.processing.splicing	at4g02400
256649_at	1.5351	0.618335	1.57537	0.655692	27.1.1 RNA.processing.splicing	at3g13570	SCL30a; RNA binding / nucleic acid binding / nucleotide binding
262110_at	1.29508	0.373041	1.33784	0.419909	27.1.1 RNA.processing.splicing	at1g02840	SR1; RNA binding / nucleic acid binding / nucleotide binding
266283_at	1.32652	0.407646	1.3329	0.41457	27.1.1 RNA.processing.splicing	at2g29210	splicing factor PWI domain-containing protein
252508_at	1.61512	0.691645	1.66561	0.736048	27.1.19 RNA.processing.ribonucleases	at3g46210	3' exoribonuclease family domain 1-containing protein
253095_at	1.36291	0.446685	1.81447	0.859548	27.1.19 RNA.processing.ribonucleases	at4g37510	ribonuclease III family protein
259227_at	1.71227	0.77591	1.61279	0.689558	27.1.19 RNA.processing.ribonucleases	at3g07750	3' exoribonuclease family domain 1-containing protein
263864_at	1.6207	0.69662	1.79817	0.84653	27.1.19 RNA.processing.ribonucleases	at2g04530	CPZ; 3'-tRNA processing endoribonuclease
264357_at	1.783	0.834309	1.9686	0.977167	27.1.19 RNA.processing.ribonucleases	at1g03360	ATRRP4 (ARABIDOPSIS THALIANA RIBOSOMAL RNA PROCESSING 4); RNA binding / exonuclease
247465_at	2.17761	1.12274	2.98249	1.57652	27.1.2 RNA.processing.RNA helicase	at5g62190	PRH75; ATP-dependent helicase/ DEAD/H-box RNA helicase binding
248816_at	1.30695	0.386203	1.47921	0.564823	27.1.2 RNA.processing.RNA helicase	at5g47010	LBA1 (LOW-LEVEL BETA-AMYLASE 1); ATP binding / DNA binding / RNA helicase/ hydrolase
250529_at	2.59812	1.37747	5.81032	2.53862	27.1.2 RNA.processing.RNA helicase	at5g08610	DEAD box RNA helicase (RH26)
250538_at	2.03739	1.02673	2.543	1.34653	27.1.2 RNA.processing.RNA helicase	at5g08620	STRS2 (STRESS RESPONSE SUPPRESSOR 2); ATP-dependent helicase/ RNA binding
260525_at	1.52158	0.605567	1.6449	0.717997	27.1.2 RNA.processing.RNA helicase	at2g47250	RNA helicase, putative
258034_at	2.7542	1.46163	4.21444	2.07534	27.1.21 RNA.processing.siRNA methyltransferase	at3g21300	RNA methyltransferase family protein
249816_at	1.59324	0.671964	1.68778	0.755126	27.1.3.3 RNA.processing.3' end processing.CPSF100	at5g23880	CPSF100 (CLEAVAGE AND POLYADENYLATION SPECIFICITY FACTOR 100); DNA binding / protein binding
251593_at	2.37835	1.24996	2.91827	1.54511	27.2 RNA.transcription	at3g57660	NRPA1; DNA binding / DNA-directed RNA polymerase/ zinc ion binding
254615_at	1.23174	0.3007	1.41079	0.496506	27.2 RNA.transcription	at4g19210	ATRLI2; transporter
258928_at	1.50764	0.592296	1.44775	0.533808	27.2 RNA.transcription	at3g10070	TAF12 (TBP-ASSOCIATED FACTOR 12); DNA binding / transcription initiation factor
260049_at	1.63362	0.708069	1.41701	0.502847	27.2 RNA.transcription	at1g29940	NRPA2; DNA binding / DNA-directed RNA polymerase/ ribonucleoside binding
260283_at	1.92334	0.943611	3.467	1.79369	27.2 RNA.transcription	at1g80480	PTAC17 (PLASTID TRANSCRIPTIONALLY ACTIVE17)
265991_at	2.0215	1.01542	2.37394	1.24728	27.2 RNA.transcription	at2g24120	SCA3 (SCABRA 3); DNA binding / DNA-directed RNA polymerase
266510_at	2.0609	1.04328	2.32749	1.21877	27.2 RNA.transcription AND 29.2.2.3.4 protein.synthesis.ribosome biogenesis.Pre-rRNA processing and modifications.WD-repeat proteins AND 33.99 development.unspecified	at2g47990	SWA1 (SLOW WALKER1); nucleotide binding
262207_at	1.90022	0.926169	2.39037	1.25723	27.3 RNA.regulation of transcription	at1g74850	PTAC2 (PLASTID TRANSCRIPTIONALLY ACTIVE2)
262502_at	1.69622	0.762324	3.2673	1.7081	27.3 RNA.regulation of transcription	at1g21600	PTAC6 (PLASTID TRANSCRIPTIONALLY ACTIVE6)
266957_at	2.09765	1.06877	4.84692	2.27707	27.3 RNA.regulation of transcription	at2g34640	PTAC12 (PLASTID TRANSCRIPTIONALLY ACTIVE12)
245383_at	1.50506	0.589819	3.69197	1.88439	27.3.11 RNA.regulation of transcription.C2H2 zinc finger family	at4g17810	nucleic acid binding / transcription factor/ zinc ion binding
256344_at	1.45621	0.542218	1.87534	0.907155	27.3.11 RNA.regulation of transcription.C2H2 zinc finger family	at1g72050	TFIIIA (TRANSCRIPTION FACTOR IIIA); 5S rDNA binding / 5S rRNA binding / nucleic acid binding / transcription factor/ zinc ion
258089_at	1.54651	0.629015	1.83467	0.875522	27.3.11 RNA.regulation of transcription.C2H2 zinc finger family	at3g14740	PHD finger family protein
260776_at	1.57764	0.657772	2.44313	1.28873	27.3.11 RNA.regulation of transcription.C2H2 zinc finger family	at1g14580	zinc finger (C2H2 type) family protein
265662_at	1.46212	0.54806	1.62396	0.699518	27.3.11 RNA.regulation of transcription.C2H2 zinc finger family	at2g24500	FZF; transcription factor
267309_at	1.63803	0.71196	1.53891	0.621913	27.3.11 RNA.regulation of transcription.C2H2 zinc finger family	at2g19385	zinc ion binding
250647_at	1.49784	0.582886	1.46844	0.554287	27.3.12 RNA.regulation of transcription.C3H zinc finger family	at5g06770	KH domain-containing protein / zinc finger (CCCH type) family protein
258024_at	1.50895	0.593548	1.77385	0.826888	27.3.12 RNA.regulation of transcription.C3H zinc finger family	at3g19360	zinc finger (CCCH-type) family protein
260425_at	2.36685	1.24297	3.24043	1.69619	27.3.13 RNA.regulation of transcription.CCAAT box binding factor family, DR1	at1g72440	EDA25 (embryo sac development arrest 25)
262098_at	1.41084	0.49655	0.535903	-0.899956	27.3.16 RNA.regulation of transcription.CCAAT box binding factor family, HAP5	at1g56170	NF-YC2 (NUCLEAR FACTOR Y, SUBUNIT C2); DNA binding / transcription activator/ transcription factor
245576_at	1.43115	0.517177	1.74812	0.805803	27.3.17 RNA.regulation of transcription.CPP(Zn),CPP1-related transcription factor family	at4g14770	TCX2 (TESMIN/TSO1-LIKE CXC 2); transcription factor
263955_at	1.33894	0.421094	1.78623	0.836917	27.3.18 RNA.regulation of transcription.E2F/DP transcription factor family	at2g36010	E2F3 (E2F TRANSCRIPTION FACTOR 3); DNA binding / transcription factor
254370_at	1.51453	0.598868	1.75261	0.809501	27.3.22 RNA.regulation of transcription.HB,Homeobox transcription factor family	at4g21750	ATML1 (MERISTEM LAYER 1); DNA binding / sequence-specific DNA binding / transcription factor
255277_at	1.64236	0.715771	2.31827	1.21305	27.3.22 RNA.regulation of transcription.HB,Homeobox transcription factor family	at4g04890	PDF2 (PROTODERMAL FACTOR 2); DNA binding / transcription factor
264974_at	1.31091	0.390565	1.64515	0.718221	27.3.22 RNA.regulation of transcription.HB,Homeobox transcription factor family	at1g27050	ATHB54 (ARABIDOPSIS THALIANA HOMEOBOX PROTEIN 54); nucleic acid binding / transcription factor
250476_at	2.00699	1.00503	2.63973	1.40039	27.3.24 RNA.regulation of transcription.MADS box transcription factor family	at5g10140	FLC (FLOWERING LOCUS C); specific transcriptional repressor/ transcription factor
250386_at	1.48699	0.5724	1.61777	0.694008	27.3.25 RNA.regulation of transcription.MYB domain transcription factor family	at5g11510	MYB3R-4 (myb domain protein 3R-4); DNA binding / transcription coactivator/ transcription factor
261491_at	1.48807	0.573443	1.35686	0.44027	27.3.25 RNA.regulation of transcription.MYB domain transcription factor family	at1g14350	FLP (FOUR LIPS); DNA binding / transcription factor
250099_at	1.34249	0.424916	4.07345	2.02625	27.3.26 RNA.regulation of transcription.MYB-related transcription factor family	at5g17300	myb family transcription factor
258724_at	1.85758	0.893428	1.87379	0.905957	27.3.26 RNA.regulation of transcription.MYB-related transcription factor family	at3g09600	myb family transcription factor
261569_at	1.65492	0.726758	2.24809	1.1687	27.3.26 RNA.regulation of transcription.MYB-related transcription factor family	at1g01060	LHY (LATE ELONGATED HYPOCOTYL); DNA binding / transcription factor
266719_at	1.62135	0.697198	1.72422	0.785945	27.3.26 RNA.regulation of transcription.MYB-related transcription factor family	at2g46830	CCA1 (CIRCADIAN CLOCK ASSOCIATED 1); DNA binding / transcription activator/ transcription factor/ transcription repressor
257547_at	1.61832	0.694496	1.84834	0.886229	27.3.27 RNA.regulation of transcription.NAC domain transcription factor family	at3g13000	transcription factor
257267_at	1.73091	0.791527	2.22657	1.15482	27.3.29 RNA.regulation of transcription.TCP transcription factor family	at3g15030	TCP4 (TCP family transcription factor 4); transcription factor
250379_at	1.40561	0.491191	1.37904	0.463664	27.3.3 RNA.regulation of transcription.AP2/EREBP, APETALA2/Ethylene-responsive element binding protein family	at5g11590	TINY2 (TINY2); DNA binding / transcription factor
254235_at	1.88569	0.915094	3.11002	1.63692	27.3.3 RNA.regulation of transcription.AP2/EREBP, APETALA2/Ethylene-responsive element binding protein family	at4g23750	CRF2 (CYTOKININ RESPONSE FACTOR 2); DNA binding / transcription factor
267010_at	1.7136	0.777027	2.63937	1.40019	27.3.3 RNA.regulation of transcription.AP2/EREBP, APETALA2/Ethylene-responsive element binding protein family	at2g39250	SNZ (SCHNARCHZAPFEN); DNA binding / transcription factor
260528_at	1.4792	0.564821	1.34873	0.431599	27.3.32 RNA.regulation of transcription.WRKY domain transcription factor family	at2g47260	WRKY23; transcription factor
263797_at	1.69112	0.757982	4.71768	2.23808	27.3.32 RNA.regulation of transcription.WRKY domain transcription factor family	at2g24570	WRKY17; calmodulin binding / transcription factor
266314_at	1.41631	0.502136	1.65563	0.727384	27.3.36 RNA.regulation of transcription.Argonaute	at2g27040	AGO4 (ARGONAUTE 4); nucleic acid binding
253043_at	1.53523	0.618454	7.95528	2.99191	27.3.37 RNA.regulation of transcription.AS2,Lateral Organ Boundaries Gene Family	at4g37540	LBD39 (LOB DOMAIN-CONTAINING PROTEIN 39)
257766_at	1.80975	0.855792	2.37393	1.24728	27.3.40 RNA.regulation of transcription.Aux/IAA family	at3g23030	IAA2 (INDOLE-3-ACETIC ACID INDUCIBLE 2); transcription factor
257769_at	1.51572	0.600001	3.00264	1.58623	27.3.40 RNA.regulation of transcription.Aux/IAA family	at3g23050	IAA7 (INDOLE-3-ACETIC ACID 7); transcription factor
256078_at	1.34722	0.429985	1.52067	0.604708	27.3.42 RNA.regulation of transcription.Bromodomain proteins	at1g20670	DNA-binding bromodomain-containing protein
247056_at	1.50854	0.593153	2.55636	1.35409	27.3.44 RNA.regulation of transcription.Chromatin Remodeling Factors	at5g66750	DDM1, CHR01, CHR1, CHA1, SOM4, SOM1, ATDDM1
255902_at	1.37469	0.459103	2.73727	1.45274	27.3.50 RNA.regulation of transcription.General Transcription	at1g17880	nascent polypeptide-associated complex (NAC) domain-containing protein / BTF3b-like transcription factor, putative
258079_at	1.51809	0.602261	1.97817	0.984164	27.3.50 RNA.regulation of transcription.General Transcription	at3g25940	transcription factor S-II (TFIIS) domain-containing protein
249901_at	1.84401	0.882843	2.69997	1.43295	27.3.55 RNA.regulation of transcription.HDA	at5g22650	HD2B (HISTONE DEACETYLASE 2B); histone deacetylase
252625_at	3.16252	1.66108	5.97105	2.57798	27.3.55 RNA.regulation of transcription.HDA	at3g44750	HDA3 (HISTONE DEACETYLASE 3); histone deacetylase/ nucleic acid binding / zinc ion binding
266253_at	2.63256	1.39646	6.92485	2.79178	27.3.55 RNA.regulation of transcription.HDA	at2g27840	HDT4; histone deacetylase
248460_at	1.61826	0.694447	4.77763	2.25629	27.3.6 RNA.regulation of transcription.bHLH,Basic Helix-Loop-Helix family	at5g50915	basic helix-loop-helix (bHLH) family protein
248839_at	2.08096	1.05725	3.94045	1.97836	27.3.6 RNA.regulation of transcription.bHLH,Basic Helix-Loop-Helix family	at5g46690	bHLH071 (beta HLH protein 71); DNA binding / transcription factor
249383_at	1.5848	0.664298	4.95357	2.30847	27.3.6 RNA.regulation of transcription.bHLH,Basic Helix-Loop-Helix family	at5g39860	PRE1 (PACLOBUTRAZOL RESISTANCE1); DNA binding / transcription factor
261196_at	1.38589	0.470811	2.20445	1.14042	27.3.6 RNA.regulation of transcription.bHLH,Basic Helix-Loop-Helix family	at1g12860	SCRM2 (SCREAM 2); DNA binding / transcription factor
246809_s_at	1.71768	0.780463	2.10432	1.07336	27.3.67 RNA.regulation of transcription.putative transcription regulator	MULTIPLE HITS	ATARD1 (ACIREDUCTONE DIOXYGENASE 1); acireductone dioxygenase [iron(II)-requiring]/ metal
251365_at	1.32883	0.410153	1.5427	0.625458	27.3.67 RNA.regulation of transcription.putative transcription regulator	at3g61310	DNA-binding family protein
251537_at	1.42525	0.511216	1.72812	0.789203	27.3.67 RNA.regulation of transcription.putative transcription regulator	at3g58470	methyltransferase/ nucleic acid binding
256675_at	1.8782	0.909351	2.99299	1.58159	27.3.67 RNA.regulation of transcription.putative transcription regulator	at3g52170	DNA binding
260095_at	1.69261	0.759251	3.82726	1.93631	27.3.67 RNA.regulation of transcription.putative transcription regulator	at1g73230	nascent polypeptide-associated complex (NAC) domain-containing protein
260331_at	2.21877	1.14976	1.93922	0.955475	27.3.67 RNA.regulation of transcription.putative transcription regulator	at1g80270	DNA-binding protein, putative
261232_at	1.31161	0.391344	1.72316	0.785059	27.3.67 RNA.regulation of transcription.putative transcription regulator	at1g20220	nucleic acid binding
261493_at	1.47624	0.561931	2.02422	1.01737	27.3.67 RNA.regulation of transcription.putative transcription regulator	at1g14410	WHY1 (WHIRLY 1); DNA binding / telomeric DNA binding
262094_at	2.46641	1.30241	3.52788	1.8188	27.3.67 RNA.regulation of transcription.putative transcription regulator	at1g56110	NOP56 (Arabidopsis homolog of nucleolar protein Nop56)
264177_at	1.29013	0.367519	2.65498	1.4087	27.3.67 RNA.regulation of transcription.putative transcription regulator	at1g02150	pentatricopeptide (PPR) repeat-containing protein
264913_at	1.50298	0.587822	2.85009	1.51101	27.3.67 RNA.regulation of transcription.putative transcription regulator	at1g60770	pentatricopeptide (PPR) repeat-containing protein
248744_at	1.57259	0.653143	1.29512	0.373089	27.3.7 RNA.regulation of transcription.C2C2(Zn) CO-like, Constans-like zinc finger family	at5g48250	zinc finger (B-box type) family protein
247517_at	1.35615	0.439518	1.69016	0.757157	27.3.73 RNA.regulation of transcription.Zn-finger(CCHC)	at5g61780	tudor domain-containing protein / nuclease family protein
247452_at	1.28176	0.358121	2.26564	1.17992	27.3.8 RNA.regulation of transcription.C2C2(Zn) DOF zinc finger family	at5g62430	CDF1 (CYCLING DOF FACTOR 1); DNA binding / protein binding / transcription factor
255652_at	1.62829	0.703361	3.56755	1.83493	27.3.8 RNA.regulation of transcription.C2C2(Zn) DOF zinc finger family	at4g00950	MEE47 (maternal effect embryo arrest 47); transcription factor
260887_at	1.42069	0.506591	1.37076	0.454973	27.3.8 RNA.regulation of transcription.C2C2(Zn) DOF zinc finger family	at1g29160	Dof-type zinc finger domain-containing protein
261502_at	1.47397	0.559711	2.21051	1.14438	27.3.80 RNA.regulation of transcription.zf-HD	at1g14440	AtHB31 (ARABIDOPSIS THALIANA HOMEOBOX PROTEIN 31); DNA binding / transcription factor
267474_at	2.07228	1.05122	4.58607	2.19726	27.3.82 RNA.regulation of transcription.plant TF (pbf2)	at2g02740	WHY3 (WHIRLY 3); DNA binding
251373_at	1.37507	0.459506	1.40193	0.487419	27.3.9 RNA.regulation of transcription.C2C2(Zn) GATA transcription factor family	at3g60530	zinc finger (GATA type) family protein
251861_at	1.49491	0.580054	1.59943	0.677561	27.3.9 RNA.regulation of transcription.C2C2(Zn) GATA transcription factor family	at3g54810	zinc finger (GATA type) family protein
245183_at	1.35465	0.437915	1.48643	0.571854	27.3.99 RNA.regulation of transcription.unclassified	at5g12440	nucleic acid binding / nucleotide binding / zinc ion binding
246521_at	1.64904	0.721631	1.67637	0.745345	27.3.99 RNA.regulation of transcription.unclassified	at5g15810	N2,N2-dimethylguanosine tRNA methyltransferase family protein
248065_at	1.7333	0.793525	2.71048	1.43855	27.3.99 RNA.regulation of transcription.unclassified	at5g55580	mitochondrial transcription termination factor family protein / mTERF family protein
248201_at	1.61646	0.692838	3.12338	1.64311	27.3.99 RNA.regulation of transcription.unclassified	at5g54180	PTAC15 (PLASTID TRANSCRIPTIONALLY ACTIVE15)
249290_at	1.54851	0.630876	1.955	0.967167	27.3.99 RNA.regulation of transcription.unclassified	at5g41060	zinc finger (DHHC type) family protein
250270_at	1.34499	0.427599	1.50376	0.588572	27.3.99 RNA.regulation of transcription.unclassified	at5g12980	rcd1-like cell differentiation protein, putative
250554_at	1.56136	0.642805	2.12923	1.09033	27.3.99 RNA.regulation of transcription.unclassified	at5g07900	mitochondrial transcription termination factor family protein / mTERF family protein
251832_at	1.38526	0.470155	1.39518	0.480453	27.3.99 RNA.regulation of transcription.unclassified	at3g55150	ATEXO70H1 (exocyst subunit EXO70 family protein H1); protein binding
251899_at	2.43749	1.2854	6.85122	2.77636	27.3.99 RNA.regulation of transcription.unclassified	at3g54400	aspartyl protease family protein
253396_at	1.69461	0.760951	1.73693	0.796538	27.3.99 RNA.regulation of transcription.unclassified	at4g32720	AtLa1 (Arabidopsis thaliana La protein 1); RNA binding
260347_at	1.49682	0.581903	3.16779	1.66348	27.3.99 RNA.regulation of transcription.unclassified	at1g69420	zinc finger (DHHC type) family protein
261603_at	1.83018	0.871986	2.76489	1.46722	27.3.99 RNA.regulation of transcription.unclassified	at1g49600	ATRBP47A (Arabidopsis thaliana RNA-binding protein 47a); RNA binding
263039_at	1.4388	0.524863	1.85582	0.892057	27.3.99 RNA.regulation of transcription.unclassified	at1g23280	MAK16 protein-related
263844_at	1.39271	0.4779	1.95165	0.964693	27.3.99 RNA.regulation of transcription.unclassified	at2g36930	zinc finger (C2H2 type) family protein
264672_at	1.83652	0.876977	14.4046	3.84846	27.3.99 RNA.regulation of transcription.unclassified	at1g09750	chloroplast nucleoid DNA-binding protein-related
265274_at	1.94295	0.958248	2.8992	1.53565	27.3.99 RNA.regulation of transcription.unclassified	at2g28450	zinc finger (CCCH-type) family protein
251956_at	4.04804	2.01722	16.8167	4.07182	27.3.99 RNA.regulation of transcription.unclassified AND 27.4 RNA.RNA binding	at3g53460	CP29; RNA binding / poly(U) binding
245387_at	1.53853	0.621554	2.18384	1.12687	27.4 RNA.RNA binding	at4g17520	nuclear RNA-binding protein, putative
245778_at	1.40186	0.487339	2.11555	1.08103	27.4 RNA.RNA binding	at1g73530	RNA recognition motif (RRM)-containing protein
246170_at	1.26717	0.341605	2.06481	1.04601	27.4 RNA.RNA binding	at5g32450	RNA recognition motif (RRM)-containing protein
248552_at	1.32509	0.406088	1.88505	0.9146	27.4 RNA.RNA binding	at5g50250	31 kDa ribonucleoprotein, chloroplast, putative / RNA-binding protein RNP-T, putative / RNA-binding protein 1/2/3, putative / RNA-binding protein cp31, putative
248797_at	1.57521	0.655542	2.87715	1.52464	27.4 RNA.RNA binding	at5g47210	nuclear RNA-binding protein, putative
250843_at	1.5302	0.613721	2.64942	1.40568	27.4 RNA.RNA binding	at5g04430	BTR1L (BINDING TO TOMV RNA 1L (LONG FORM)); nucleic acid binding
250845_at	1.76725	0.821506	2.2202	1.15069	27.4 RNA.RNA binding	at5g04600	RNA recognition motif (RRM)-containing protein
251442_at	1.3186	0.399007	3.46835	1.79425	27.4 RNA.RNA binding	at3g59980	tRNA-binding region domain-containing protein
253926_at	1.44615	0.532222	1.9968	0.997692	27.4 RNA.RNA binding	at4g26650	RNA recognition motif (RRM)-containing protein
253964_at	1.32026	0.400817	1.64712	0.719948	27.4 RNA.RNA binding	at4g26480	KH domain-containing protein
254527_at	1.40934	0.495015	1.33998	0.422213	27.4 RNA.RNA binding	at4g19610	RNA binding / nucleic acid binding / nucleotide binding
254684_at	1.62184	0.697634	1.66767	0.737834	27.4 RNA.RNA binding	at4g13850	GR-RBP2 (GLYCINE-RICH RNA-BINDING PROTEIN 2); ATP binding / RNA binding / double-stranded DNA binding / single-
255411_at	1.47338	0.559128	3.15302	1.65673	27.4 RNA.RNA binding	at4g03110	RNA-binding protein, putative
255962_at	1.561	0.642468	2.271	1.18333	27.4 RNA.RNA binding	at1g22330	RNA binding / nucleic acid binding / nucleotide binding
255969_at	2.23441	1.15989	3.75549	1.909	27.4 RNA.RNA binding	at1g22330	RNA binding / nucleic acid binding / nucleotide binding
256678_at	1.37791	0.462487	4.50928	2.1729	27.4 RNA.RNA binding	at3g52380	CP33; RNA binding
256890_at	2.23552	1.16061	5.38018	2.42765	27.4 RNA.RNA binding	at3g23830	GRP4 (GLYCINE-RICH RNA-BINDING PROTEIN 4); RNA binding / double-stranded DNA binding / single-stranded DNA binding
256980_at	1.50012	0.585081	1.50552	0.590261	27.4 RNA.RNA binding	at3g26932	DRB3 (dsRNA-binding protein 3); RNA binding / double-stranded RNA binding
257180_at	1.82994	0.871793	4.16253	2.05746	27.4 RNA.RNA binding	at3g13180	NOL1/NOP2/sun family protein / antitermination NusB domain-containing protein
263548_at	1.38684	0.471804	1.48495	0.570417	27.4 RNA.RNA binding	at2g21660	CCR2 (COLD, CIRCADIAN RHYTHM, AND RNA BINDING 2); RNA binding / double-stranded DNA binding / single-stra
263766_at	1.80474	0.851792	2.55635	1.35408	27.4 RNA.RNA binding	at2g21440	RNA recognition motif (RRM)-containing protein
264664_at	1.56689	0.647901	1.69841	0.764184	27.4 RNA.RNA binding	at1g09660	KH domain-containing quaking protein, putative
264665_at	1.38914	0.474189	1.39214	0.477299	27.4 RNA.RNA binding	at1g09660	KH domain-containing quaking protein, putative
264698_at	1.78215	0.833619	4.18763	2.06614	27.4 RNA.RNA binding	at1g70200	RNA recognition motif (RRM)-containing protein
265966_at	1.34793	0.430741	2.98584	1.57814	27.4 RNA.RNA binding	at2g37220	29 kDa ribonucleoprotein, chloroplast, putative / RNA-binding protein cp29, putative
266534_at	1.32096	0.401587	1.3163	0.396491	27.4 RNA.RNA binding	at2g16940	RNA recognition motif (RRM)-containing protein
247726_at	1.35636	0.439743	2.63294	1.39667	28.1 DNA.synthesis/chromatin structure	at5g59430	TRP1 (TELOMERIC REPEAT BINDING PROTEIN 1); DNA binding / double-stranded telomeric DNA binding
247955_at	1.75674	0.812904	2.10083	1.07096	28.1 DNA.synthesis/chromatin structure	at5g56950	NAP1;3 (NUCLEOSOME ASSEMBLY PROTEIN 1;3); DNA binding
248854_at	1.51448	0.598825	2.25636	1.174	28.1 DNA.synthesis/chromatin structure	at5g46580	pentatricopeptide (PPR) repeat-containing protein
249672_at	1.36069	0.444342	1.38291	0.467703	28.1 DNA.synthesis/chromatin structure	at5g35910	3'-5' exonuclease domain-containing protein / helicase and RNase D C-terminal domain-containing protein / HRDC domain-containing protein
250078_at	1.31946	0.399942	1.49504	0.580187	28.1 DNA.synthesis/chromatin structure	at5g16690	ORC3 (ORIGIN RECOGNITION COMPLEX SUBUNIT 3); protein binding
250367_s_at	1.39627	0.481573	2.19304	1.13293	28.1 DNA.synthesis/chromatin structure	MULTIPLE HITS	ATARD1 (ACIREDUCTONE DIOXYGENASE 1); acireductone dioxygenase [iron(II)-requiring]/ metal
250560_at	1.6002	0.678255	2.70423	1.43522	28.1 DNA.synthesis/chromatin structure	at5g08020	RPA70B (RPA70-KDA SUBUNIT B); DNA binding / nucleic acid binding
250974_at	1.68949	0.75659	1.88935	0.917889	28.1 DNA.synthesis/chromatin structure	at5g02820	RHL2 (ROOT HAIRLESS 2); ATP binding / DNA binding / DNA topoisomerase (ATP-hydrolyzing)/ identical protein binding / prote
253996_at	2.02101	1.01508	2.92582	1.54884	28.1 DNA.synthesis/chromatin structure	at4g26110	NAP1;1 (NUCLEOSOME ASSEMBLY PROTEIN1;1); DNA binding
255053_at	1.85855	0.894178	2.23219	1.15846	28.1 DNA.synthesis/chromatin structure	at4g09730	DEAD/DEAH box helicase, putative
255333_at	1.41698	0.502823	1.56738	0.648355	28.1 DNA.synthesis/chromatin structure	at4g04410	transposable element gene
255513_at	1.52477	0.608594	3.00347	1.58663	28.1 DNA.synthesis/chromatin structure	at4g02060	PRL (PROLIFERA); ATP binding / DNA binding / DNA-dependent ATPase/ nucleoside-triphosphatase/ nucleotide binding
256797_at	2.47818	1.30928	3.05169	1.60961	28.1 DNA.synthesis/chromatin structure	at3g18600	DEAD/DEAH box helicase, putative
256864_at	1.58378	0.663376	2.48352	1.31238	28.1 DNA.synthesis/chromatin structure	at3g23890	TOPII (TOPOISOMERASE II); ATP binding / DNA binding / DNA topoisomerase (ATP-hydrolyzing)/ DNA topoisomerase/ DNA-depe
258554_at	1.65002	0.722482	3.29894	1.722	28.1 DNA.synthesis/chromatin structure	at3g06980	DEAD/DEAH box helicase, putative
258573_at	1.67365	0.742999	2.89184	1.53199	28.1 DNA.synthesis/chromatin structure	at3g04260	PTAC3 (PLASTID TRANSCRIPTIONALLY ACTIVE3); DNA binding / nucleic acid binding
258966_at	2.11093	1.07788	4.43011	2.14734	28.1 DNA.synthesis/chromatin structure	at3g10690	DNA gyrase subunit A family protein
259690_at	1.38961	0.474682	1.45925	0.545229	28.1 DNA.synthesis/chromatin structure	at1g63160	replication factor C 40 kDa, putative
260235_at	2.00684	1.00492	1.99706	0.997879	28.1 DNA.synthesis/chromatin structure	at1g74560	NRP1 (NAP1-RELATED PROTEIN 1); DNA binding / chromatin binding / histone binding
261406_at	1.53716	0.620267	1.71674	0.779669	28.1 DNA.synthesis/chromatin structure	at1g18800	NRP2 (NAP1-RELATED PROTEIN 2); DNA binding / chromatin binding / histone binding
261810_at	1.53744	0.620534	1.83691	0.87728	28.1 DNA.synthesis/chromatin structure	at1g08130	ATLIG1 (ARABIDOPSIS THALIANA DNA LIGASE 1); ATP binding / DNA binding / DNA ligase (ATP)
263679_at	1.83513	0.875881	1.97823	0.984212	28.1 DNA.synthesis/chromatin structure	at1g59990	DEAD/DEAH box helicase, putative (RH22)
265940_at	1.32628	0.40739	1.54595	0.628492	28.1 DNA.synthesis/chromatin structure	at2g19480	NAP1;2 (NUCLEOSOME ASSEMBLY PROTEIN 1;2); DNA binding
259138_s_at	1.44743	0.533493	1.5969	0.675278	28.1 DNA.synthesis/chromatin structure AND 28.2 DNA.repair	MULTIPLE HITS	ATARD1 (ACIREDUCTONE DIOXYGENASE 1); acireductone dioxygenase [iron(II)-requiring]/ metal
247651_at	1.51176	0.596233	5.52402	2.46572	28.1.3.2.1 DNA.synthesis/chromatin structure.histone.core.H2A	at5g59870	HTA6; DNA binding
249916_at	1.6245	0.699994	4.08604	2.0307	28.1.3.2.1 DNA.synthesis/chromatin structure.histone.core.H2A	at5g22880	HTB2; DNA binding
261411_at	1.31363	0.393564	1.79548	0.844367	28.1.3.2.2 DNA.synthesis/chromatin structure.histone.core.H2B	at1g07790	HTB1; DNA binding
245147_at	1.29074	0.368195	1.63046	0.705278	28.2 DNA.repair	at2g45280	ATRAD51C; ATP binding / damaged DNA binding / protein binding / recombinase/ single-stranded DNA binding
247277_at	1.75759	0.813598	1.96553	0.97492	28.2 DNA.repair	at5g64420	DNA polymerase V family
261352_at	1.40585	0.491447	1.50352	0.58834	28.2 DNA.repair	at1g79650	RAD23; damaged DNA binding
265695_at	1.48107	0.56664	2.72422	1.44584	28.2 DNA.repair	at2g24490	RPA2 (REPLICON PROTEIN A2); protein binding
247032_at	1.99883	0.999157	3.01225	1.59084	28.99 DNA.unspecified	at5g67240	SDN3 (SMALL RNA DEGRADING NUCLEASE 3); exonuclease/ nucleic acid binding
251288_at	1.55435	0.636309	1.567	0.648003	28.99 DNA.unspecified	at3g61620	RRP41; 3'-5'-exoribonuclease/ RNA binding
252847_at	1.41975	0.505635	1.7066	0.771121	28.99 DNA.unspecified	at3g42170	DNA binding
256077_at	1.55181	0.633949	2.05651	1.0402	28.99 DNA.unspecified	at1g18090	exonuclease, putative
256858_at	1.60322	0.680973	1.69065	0.757576	28.99 DNA.unspecified	at3g15140	exonuclease family protein
257211_at	1.63732	0.711338	1.57408	0.65451	28.99 DNA.unspecified	at3g15080	exonuclease family protein
258861_at	1.51757	0.601762	1.58647	0.665822	28.99 DNA.unspecified	at3g02060	DEAD/DEAH box helicase, putative
262636_at	1.47264	0.558401	2.00912	1.00657	28.99 DNA.unspecified	at1g06670	NIH (NUCLEAR DEIH-BOXHELICASE); DNA binding / DNA helicase
258820_at	1.34779	0.430592	1.42289	0.50882	29.1 protein.aa activation	at3g04600	tRNA synthetase class I (W and Y) family protein
266057_at	1.33901	0.421171	1.29755	0.375791	29.1 protein.aa activation	at2g40660	tRNA-binding region domain-containing protein
266648_at	1.41067	0.496381	3.09665	1.63071	29.1 protein.aa activation	at2g25840	OVA4 (ovule abortion 4); ATP binding / aminoacyl-tRNA ligase/ nucleotide binding / tryptophan-tRNA ligase
258475_at	1.30471	0.383733	1.55142	0.633589	29.1.1 protein.aa activation.tyrosine-tRNA ligase	at3g02660	emb2768 (EMBRYO DEFECTIVE 2768); ATP binding / RNA binding / aminoacyl-tRNA ligase/ nucleotide binding / tyrosine-tRNA ligase
251807_at	1.55441	0.636363	2.61442	1.38649	29.1.10 protein.aa activation.methionine-tRNA ligase	at3g55400	OVA1 (OVULE ABORTION 1); ATP binding / aminoacyl-tRNA ligase/ methionine-tRNA ligase/ nucleotide binding
253295_at	1.73696	0.796561	3.22153	1.68775	29.1.12 protein.aa activation.aspartate-tRNA ligase	at4g33760	tRNA synthetase class II (D, K and N) family protein
252404_at	1.62174	0.697542	4.04255	2.01527	29.1.14 protein.aa activation.glycine-tRNA ligase	at3g48110	EDD1 (EMBRYO-DEFECTIVE-DEVELOPMENT 1); glycine-tRNA ligase
251728_at	1.45998	0.545949	1.46053	0.546495	29.1.16 protein.aa activation.cysteine-tRNA ligase	at3g56300	tRNA synthetase class I (C) family protein
266478_at	1.74524	0.803429	4.0365	2.0131	29.1.16 protein.aa activation.cysteine-tRNA ligase	at2g31170	SYCO ARATH; ATP binding / aminoacyl-tRNA ligase/ cysteine-tRNA ligase/ nucleotide binding
246845_at	1.29636	0.374463	1.40769	0.493328	29.1.17 protein.aa activation.glutamate-tRNA ligase	at5g26710	glutamate-tRNA ligase, putative / glutamyl-tRNA synthetase, putatuve / GluRS, putative
247319_at	1.52527	0.609064	2.74443	1.4565	29.1.17 protein.aa activation.glutamate-tRNA ligase	at5g64050	ERS (GLUTAMATE TRNA SYNTHETASE); glutamate-tRNA ligase
254004_at	1.3455	0.428145	2.14902	1.10368	29.1.19 protein.aa activation.arginine-tRNA ligase	at4g26300	emb1027 (embryo defective 1027); ATP binding / aminoacyl-tRNA ligase/ arginine-tRNA ligase/ nucleotide binding
258601_at	1.66642	0.736752	2.6711	1.41744	29.1.21 protein.aa activation.histidine-tRNA ligase	at3g02760	ATP binding / aminoacyl-tRNA ligase/ histidine-tRNA ligase/ nucleotide binding
258009_at	1.46734	0.553199	1.30094	0.379559	29.1.30 protein.aa activation.pseudouridylate synthase	at3g19440	pseudouridine synthase family protein
267017_at	1.34487	0.427464	1.91882	0.940222	29.1.30 protein.aa activation.pseudouridylate synthase	at2g39140	SVR1 (SUPPRESSOR OF VARIEGATION 1); RNA binding / pseudouridine synthase
267018_at	1.81036	0.85628	2.48884	1.31547	29.1.30 protein.aa activation.pseudouridylate synthase	at2g39140	SVR1 (SUPPRESSOR OF VARIEGATION 1); RNA binding / pseudouridine synthase
255328_at	1.33983	0.422048	1.94311	0.958368	29.1.4 protein.aa activation.leucine-tRNA ligase	at4g04350	EMB2369 (EMBRYO DEFECTIVE 2369); ATP binding / aminoacyl-tRNA ligase/ leucine-tRNA ligase/ nucleotide binding
251264_at	1.28785	0.36496	1.90554	0.930203	29.1.40 protein.aa activation.bifunctional aminoacyl-tRNA synthetase	at3g62120	tRNA synthetase class II (G, H, P and S) family protein
256963_at	1.44186	0.527928	1.66785	0.737991	29.1.6 protein.aa activation.lysine-tRNA ligase	at3g13490	OVA5 (OVULE ABORTION 5); ATP binding / aminoacyl-tRNA ligase/ lysine-tRNA ligase/ nucleic acid binding / nucleotide bin
259069_at	1.44018	0.526246	1.50897	0.593568	29.1.6 protein.aa activation.lysine-tRNA ligase	at3g11710	ATKRS-1 (ARABIDOPSIS THALIANA LYSYL-TRNA SYNTHETASE 1); ATP binding / aminoacyl-tRNA ligase/ lysine-tRNA ligase/ nucleic acid
246509_at	1.50718	0.591857	2.39183	1.25811	29.1.9 protein.aa activation.valine-tRNA ligase	at5g16715	EMB2247 (embryo defective 2247); ATP binding / aminoacyl-tRNA ligase/ nucleotide binding / valine-tRNA ligase
260780_at	1.31632	0.396509	1.86455	0.898827	29.1.9 protein.aa activation.valine-tRNA ligase	at1g14610	TWN2 (TWIN 2); ATP binding / aminoacyl-tRNA ligase/ nucleotide binding / valine-tRNA ligase
262859_at	1.40231	0.487805	2.59157	1.37383	29.2 protein.synthesis	at1g64790	binding
246517_at	1.51634	0.600589	2.14073	1.0981	29.2.1.1.1.1.83 protein.synthesis.ribosomal protein.prokaryotic.chloroplast.30S subunit.PSRP3	at5g15760	plastid-specific 30S ribosomal protein 3, putative / PSRP-3, putative
258466_at	1.30917	0.388651	1.92458	0.944545	29.2.1.1.1.2.12 protein.synthesis.ribosomal protein.prokaryotic.chloroplast.50S subunit.L12	at3g06040	ribosomal protein L12 family protein
258404_at	1.43576	0.521817	1.29957	0.378033	29.2.1.1.1.2.3 protein.synthesis.ribosomal protein.prokaryotic.chloroplast.50S subunit.L3	at3g17465	RPL3P (RIBOSOMAL PROTEIN L3 PLASTID); structural constituent of ribosome
259196_at	1.28369	0.360299	1.82476	0.867709	29.2.1.1.2.1.2 protein.synthesis.ribosomal protein.prokaryotic.mitochondrion.30S subunit.S2	at3g03600	RPS2 (RIBOSOMAL PROTEIN S2); structural constituent of ribosome
256106_at	1.35159	0.43466	1.46679	0.552663	29.2.1.1.2.1.29 protein.synthesis.ribosomal protein.prokaryotic.mitochondrion.30S subunit.S29	at1g16870	mitochondrial 28S ribosomal protein S29-related
251483_at	1.6638	0.734484	3.11993	1.64151	29.2.1.1.2.51 protein.synthesis.ribosomal protein.prokaryotic.mitochondrion.L51/S25/CI-B8	at3g59650	mitochondrial ribosomal protein L51/S25/CI-B8 family protein
259861_at	1.68837	0.755629	2.58606	1.37075	29.2.1.1.3.1.15 protein.synthesis.ribosomal protein.prokaryotic.unknown organellar.30S subunit.S15	at1g80620	ribosomal protein S15 family protein
262880_at	1.36253	0.446283	2.01409	1.01013	29.2.1.1.3.1.5 protein.synthesis.ribosomal protein.prokaryotic.unknown organellar.30S subunit.S5	at1g64880	ribosomal protein S5 family protein
257891_at	2.40426	1.26559	6.99914	2.80718	29.2.1.1.3.1.6 protein.synthesis.ribosomal protein.prokaryotic.unknown organellar.30S subunit.S6	at3g17170	RFC3 (REGULATOR OF FATTY-ACID COMPOSITION 3); structural constituent of ribosome
246746_at	1.3996	0.485015	2.71745	1.44225	29.2.1.1.3.2.18 protein.synthesis.ribosomal protein.prokaryotic.unknown organellar.50S subunit.L18	at5g27820	ribosomal protein L18 family protein
253538_at	1.41448	0.500276	1.78075	0.832484	29.2.1.1.3.2.28 protein.synthesis.ribosomal protein.prokaryotic.unknown organellar.50S subunit.L28	at4g31460	ribosomal protein L28 family protein
265594_at	1.52559	0.609371	1.28327	0.359822	29.2.1.1.3.2.4 protein.synthesis.ribosomal protein.prokaryotic.unknown organellar.50S subunit.L4	at2g20060	ribosomal protein L4 family protein
261694_at	1.71666	0.779607	3.71987	1.89525	29.2.1.1.3.2.510 protein.synthesis.ribosomal protein.prokaryotic.unknown organellar.50S subunit.L10A	at1g08360	60S ribosomal protein L10A (RPL10aA)
248295_at	1.61204	0.688886	2.80763	1.48935	29.2.1.1.3.2.9 protein.synthesis.ribosomal protein.prokaryotic.unknown organellar.50S subunit.L9	at5g53070	ribosomal protein L9 family protein
248331_at	1.77157	0.825027	3.90791	1.9664	29.2.1.2.1.10 protein.synthesis.ribosomal protein.eukaryotic.40S subunit.S10	at5g52650	40S ribosomal protein S10 (RPS10C)
249310_at	1.50563	0.590369	2.48818	1.31509	29.2.1.2.1.10 protein.synthesis.ribosomal protein.eukaryotic.40S subunit.S10	at5g41520	40S ribosomal protein S10 (RPS10B)
254049_at	1.568	0.648923	3.30067	1.72276	29.2.1.2.1.10 protein.synthesis.ribosomal protein.eukaryotic.40S subunit.S10	at4g25740	40S ribosomal protein S10 (RPS10A)
249795_at	1.55279	0.634859	4.84579	2.27673	29.2.1.2.1.11 protein.synthesis.ribosomal protein.eukaryotic.40S subunit.S11	at5g23740	RPS11-BETA (RIBOSOMAL PROTEIN S11-BETA); structural constituent of ribosome
252297_at	1.79331	0.842622	5.00079	2.32216	29.2.1.2.1.11 protein.synthesis.ribosomal protein.eukaryotic.40S subunit.S11	at3g48930	EMB1080 (embryo defective 1080); structural constituent of ribosome
253598_at	1.95598	0.967895	3.64373	1.86542	29.2.1.2.1.11 protein.synthesis.ribosomal protein.eukaryotic.40S subunit.S11	at4g30800	40S ribosomal protein S11 (RPS11B)
261789_at	1.77516	0.827947	4.91399	2.2969	29.2.1.2.1.12 protein.synthesis.ribosomal protein.eukaryotic.40S subunit.S12	at1g15930	40S ribosomal protein S12 (RPS12A)
265671_at	1.88108	0.911558	4.79579	2.26177	29.2.1.2.1.12 protein.synthesis.ribosomal protein.eukaryotic.40S subunit.S12	at2g32060	40S ribosomal protein S12 (RPS12C)
251341_at	1.52552	0.609305	2.93561	1.55366	29.2.1.2.1.13 protein.synthesis.ribosomal protein.eukaryotic.40S subunit.S13	at3g60770	40S ribosomal protein S13 (RPS13A)
255706_at	1.79245	0.841932	3.80254	1.92696	29.2.1.2.1.13 protein.synthesis.ribosomal protein.eukaryotic.40S subunit.S13	at4g00100	ATRPS13A (ARABIDOPSIS THALIANA RIBOSOMAL PROTEIN S13A); structural constituent of ribosome
252055_at	1.85545	0.891766	4.6003	2.20173	29.2.1.2.1.14 protein.synthesis.ribosomal protein.eukaryotic.40S subunit.S14	at3g52580	40S ribosomal protein S14 (RPS14C)
259239_at	1.57859	0.658637	4.35456	2.12253	29.2.1.2.1.14 protein.synthesis.ribosomal protein.eukaryotic.40S subunit.S14	at3g11510	40S ribosomal protein S14 (RPS14B)
263286_at	1.65004	0.722502	3.53955	1.82357	29.2.1.2.1.14 protein.synthesis.ribosomal protein.eukaryotic.40S subunit.S14	at2g36160	40S ribosomal protein S14 (RPS14A)
245886_at	2.07818	1.05532	6.14379	2.61913	29.2.1.2.1.15 protein.synthesis.ribosomal protein.eukaryotic.40S subunit.S15	at5g09510	40S ribosomal protein S15 (RPS15D)
263667_at	1.64744	0.720227	4.20316	2.07148	29.2.1.2.1.15 protein.synthesis.ribosomal protein.eukaryotic.40S subunit.S15	at1g04270	RPS15 (CYTOSOLIC RIBOSOMAL PROTEIN S15); structural constituent of ribosome
263821_s_at	1.49666	0.581745	2.60771	1.38279	29.2.1.2.1.16 protein.synthesis.ribosomal protein.eukaryotic.40S subunit.S16	MULTIPLE HITS	ATARD1 (ACIREDUCTONE DIOXYGENASE 1); acireductone dioxygenase [iron(II)-requiring]/ metal
250862_s_at	1.55577	0.637628	3.0537	1.61056	29.2.1.2.1.17 protein.synthesis.ribosomal protein.eukaryotic.40S subunit.S17	MULTIPLE HITS	ATARD1 (ACIREDUCTONE DIOXYGENASE 1); acireductone dioxygenase [iron(II)-requiring]/ metal
258922_at	2.08667	1.06121	5.69207	2.50895	29.2.1.2.1.17 protein.synthesis.ribosomal protein.eukaryotic.40S subunit.S17	at3g10610	40S ribosomal protein S17 (RPS17C)
262415_at	1.56977	0.650552	1.5476	0.630033	29.2.1.2.1.17 protein.synthesis.ribosomal protein.eukaryotic.40S subunit.S17	at1g49400	emb1129 (embryo defective 1129); structural constituent of ribosome
255977_at	1.73267	0.793	4.27698	2.09659	29.2.1.2.1.18 protein.synthesis.ribosomal protein.eukaryotic.40S subunit.S18	at1g34030	40S ribosomal protein S18 (RPS18B)
264203_at	1.55394	0.635935	4.82452	2.27038	29.2.1.2.1.18 protein.synthesis.ribosomal protein.eukaryotic.40S subunit.S18	at1g22780	PFL (POINTED FIRST LEAVES); RNA binding / nucleic acid binding / structural constituent of ribosome
246538_at	1.42096	0.506861	2.50845	1.3268	29.2.1.2.1.19 protein.synthesis.ribosomal protein.eukaryotic.40S subunit.S19	at5g15520	40S ribosomal protein S19 (RPS19B)
247566_at	1.69002	0.757042	4.96267	2.31112	29.2.1.2.1.19 protein.synthesis.ribosomal protein.eukaryotic.40S subunit.S19	at5g61170	40S ribosomal protein S19 (RPS19C)
258858_at	1.49264	0.57787	3.49615	1.80577	29.2.1.2.1.19 protein.synthesis.ribosomal protein.eukaryotic.40S subunit.S19	at3g02080	40S ribosomal protein S19 (RPS19A)
245841_s_at	1.5263	0.610035	2.38695	1.25517	29.2.1.2.1.2 protein.synthesis.ribosomal protein.eukaryotic.40S subunit.S2	MULTIPLE HITS	ATARD1 (ACIREDUCTONE DIOXYGENASE 1); acireductone dioxygenase [iron(II)-requiring]/ metal
251638_at	2.36913	1.24436	4.09413	2.03356	29.2.1.2.1.2 protein.synthesis.ribosomal protein.eukaryotic.40S subunit.S2	at3g57490	40S ribosomal protein S2 (RPS2D)
260497_at	1.70406	0.768977	4.75189	2.2485	29.2.1.2.1.2 protein.synthesis.ribosomal protein.eukaryotic.40S subunit.S2	at2g41840	40S ribosomal protein S2 (RPS2C)
252413_at	1.514	0.598365	2.68665	1.42581	29.2.1.2.1.20 protein.synthesis.ribosomal protein.eukaryotic.40S subunit.S20	at3g47370	40S ribosomal protein S20 (RPS20B)
252601_s_at	1.74426	0.802619	4.69099	2.22989	29.2.1.2.1.20 protein.synthesis.ribosomal protein.eukaryotic.40S subunit.S20	MULTIPLE HITS	ATARD1 (ACIREDUCTONE DIOXYGENASE 1); acireductone dioxygenase [iron(II)-requiring]/ metal
246747_at	1.30857	0.387992	2.43594	1.28448	29.2.1.2.1.21 protein.synthesis.ribosomal protein.eukaryotic.40S subunit.S21	at5g27700	structural constituent of ribosome
251921_at	1.49593	0.581038	3.48316	1.8004	29.2.1.2.1.21 protein.synthesis.ribosomal protein.eukaryotic.40S subunit.S21	at3g53890	40S ribosomal protein S21 (RPS21B)
258712_s_at	1.38027	0.464949	2.9257	1.54878	29.2.1.2.1.23 protein.synthesis.ribosomal protein.eukaryotic.40S subunit.S23	MULTIPLE HITS	ATARD1 (ACIREDUCTONE DIOXYGENASE 1); acireductone dioxygenase [iron(II)-requiring]/ metal
246730_at	1.74377	0.802209	5.55967	2.475	29.2.1.2.1.24 protein.synthesis.ribosomal protein.eukaryotic.40S subunit.S24	at5g28060	40S ribosomal protein S24 (RPS24B)
252912_at	1.573	0.653522	3.94878	1.98141	29.2.1.2.1.25 protein.synthesis.ribosomal protein.eukaryotic.40S subunit.S25	at4g39200	40S ribosomal protein S25 (RPS25E)
253202_at	1.57486	0.655222	3.23078	1.69188	29.2.1.2.1.25 protein.synthesis.ribosomal protein.eukaryotic.40S subunit.S25	at4g34555	40S ribosomal protein S25, putative
263519_at	1.7006	0.766047	3.27834	1.71296	29.2.1.2.1.25 protein.synthesis.ribosomal protein.eukaryotic.40S subunit.S25	at2g21580	40S ribosomal protein S25 (RPS25B)
251737_at	1.78634	0.837008	5.65279	2.49896	29.2.1.2.1.26 protein.synthesis.ribosomal protein.eukaryotic.40S subunit.S26	at3g56340	40S ribosomal protein S26 (RPS26C)
255819_s_at	1.54002	0.622946	2.92164	1.54678	29.2.1.2.1.26 protein.synthesis.ribosomal protein.eukaryotic.40S subunit.S26	MULTIPLE HITS	ATARD1 (ACIREDUCTONE DIOXYGENASE 1); acireductone dioxygenase [iron(II)-requiring]/ metal
248747_at	1.63254	0.707116	3.41148	1.7704	29.2.1.2.1.27 protein.synthesis.ribosomal protein.eukaryotic.40S subunit.S27	at5g47930	40S ribosomal protein S27 (RPS27D)
251357_at	1.35688	0.440297	2.55712	1.35452	29.2.1.2.1.27 protein.synthesis.ribosomal protein.eukaryotic.40S subunit.S27	at3g61110	ARS27A (ARABIDOPSIS RIBOSOMAL PROTEIN S27); structural constituent of ribosome
267507_at	1.5264	0.610133	2.41974	1.27485	29.2.1.2.1.27 protein.synthesis.ribosomal protein.eukaryotic.40S subunit.S27	at2g45710	40S ribosomal protein S27 (RPS27A)
247267_at	1.58982	0.668865	4.12723	2.04518	29.2.1.2.1.28 protein.synthesis.ribosomal protein.eukaryotic.40S subunit.S28	at5g64140	RPS28 (RIBOSOMAL PROTEIN S28); structural constituent of ribosome
250895_at	1.58074	0.660597	3.92235	1.97172	29.2.1.2.1.28 protein.synthesis.ribosomal protein.eukaryotic.40S subunit.S28	at5g03850	40S ribosomal protein S28 (RPS28B)
249700_at	1.51987	0.603949	2.09449	1.0666	29.2.1.2.1.3 protein.synthesis.ribosomal protein.eukaryotic.40S subunit.S3	at5g35530	40S ribosomal protein S3 (RPS3C)
263400_s_at	1.75069	0.807925	4.69459	2.231	29.2.1.2.1.3 protein.synthesis.ribosomal protein.eukaryotic.40S subunit.S3	MULTIPLE HITS	ATARD1 (ACIREDUCTONE DIOXYGENASE 1); acireductone dioxygenase [iron(II)-requiring]/ metal
247968_at	1.37855	0.463156	3.40666	1.76836	29.2.1.2.1.30 protein.synthesis.ribosomal protein.eukaryotic.40S subunit.S30	at5g56670	40S ribosomal protein S30 (RPS30C)
253715_at	1.39768	0.483038	2.15907	1.11041	29.2.1.2.1.30 protein.synthesis.ribosomal protein.eukaryotic.40S subunit.S30	at4g29390	40S ribosomal protein S30 (RPS30B)
266705_at	1.82525	0.868092	4.03852	2.01383	29.2.1.2.1.30 protein.synthesis.ribosomal protein.eukaryotic.40S subunit.S30	at2g19750	40S ribosomal protein S30 (RPS30A)
258799_at	1.63562	0.709841	1.614	0.690642	29.2.1.2.1.31 protein.synthesis.ribosomal protein.eukaryotic.40S subunit.SA	at3g04770	RPSAb (40S ribosomal protein SA B); structural constituent of ribosome
260426_at	1.8267	0.869237	4.03738	2.01342	29.2.1.2.1.31 protein.synthesis.ribosomal protein.eukaryotic.40S subunit.SA	at1g72370	P40; structural constituent of ribosome
247815_at	2.08521	1.06019	4.52481	2.17786	29.2.1.2.1.4 protein.synthesis.ribosomal protein.eukaryotic.40S subunit.S4	at5g58420	40S ribosomal protein S4 (RPS4D)
250667_at	1.88033	0.910984	6.12138	2.61386	29.2.1.2.1.4 protein.synthesis.ribosomal protein.eukaryotic.40S subunit.S4	at5g07090	40S ribosomal protein S4 (RPS4B)
264849_at	1.69788	0.763736	4.98212	2.31676	29.2.1.2.1.4 protein.synthesis.ribosomal protein.eukaryotic.40S subunit.S4	at2g17360	40S ribosomal protein S4 (RPS4A)
265963_s_at	1.66834	0.738415	3.32752	1.73445	29.2.1.2.1.5 protein.synthesis.ribosomal protein.eukaryotic.40S subunit.S5	MULTIPLE HITS	ATARD1 (ACIREDUCTONE DIOXYGENASE 1); acireductone dioxygenase [iron(II)-requiring]/ metal
247654_at	1.90751	0.931689	5.03453	2.33186	29.2.1.2.1.515 protein.synthesis.ribosomal protein.eukaryotic.40S subunit.S15A	at5g59850	40S ribosomal protein S15A (RPS15aF)
252566_at	1.53563	0.61883	2.72999	1.4489	29.2.1.2.1.515 protein.synthesis.ribosomal protein.eukaryotic.40S subunit.S15A	at3g46040	RPS15AD (ribosomal protein S15A D); structural constituent of ribosome
261416_at	1.27346	0.348751	3.7603	1.91085	29.2.1.2.1.515 protein.synthesis.ribosomal protein.eukaryotic.40S subunit.S15A	at1g07770	RPS15A (ribosomal protein s15a); structural constituent of ribosome
253248_at	1.77255	0.825826	3.17952	1.66881	29.2.1.2.1.53 protein.synthesis.ribosomal protein.eukaryotic.40S subunit.S3A	at4g34670	40S ribosomal protein S3A (RPS3aB)
259096_at	1.8509	0.888226	6.06304	2.60004	29.2.1.2.1.53 protein.synthesis.ribosomal protein.eukaryotic.40S subunit.S3A	at3g04840	40S ribosomal protein S3A (RPS3aA)
250440_at	1.83926	0.879127	3.44685	1.78528	29.2.1.2.1.6 protein.synthesis.ribosomal protein.eukaryotic.40S subunit.S6	at5g10360	EMB3010 (embryo defective 3010); structural constituent of ribosome
253487_at	1.77396	0.826971	5.47035	2.45163	29.2.1.2.1.6 protein.synthesis.ribosomal protein.eukaryotic.40S subunit.S6	at4g31700	RPS6 (RIBOSOMAL PROTEIN S6); structural constituent of ribosome
246503_at	1.83779	0.877973	5.69382	2.5094	29.2.1.2.1.7 protein.synthesis.ribosomal protein.eukaryotic.40S subunit.S7	at5g16130	40S ribosomal protein S7 (RPS7C)
258486_at	1.91822	0.939772	5.60193	2.48592	29.2.1.2.1.7 protein.synthesis.ribosomal protein.eukaryotic.40S subunit.S7	at3g02560	40S ribosomal protein S7 (RPS7B)
246068_at	1.56597	0.647061	2.82556	1.49854	29.2.1.2.1.8 protein.synthesis.ribosomal protein.eukaryotic.40S subunit.S8	at5g20290	40S ribosomal protein S8 (RPS8A)
247739_at	1.65635	0.728007	1.98509	0.989201	29.2.1.2.1.8 protein.synthesis.ribosomal protein.eukaryotic.40S subunit.S8	at5g59240	40S ribosomal protein S8 (RPS8B)
250703_at	1.4678	0.553659	1.72185	0.78396	29.2.1.2.1.8 protein.synthesis.ribosomal protein.eukaryotic.40S subunit.S8	at5g06360	ribosomal protein S8e family protein
250159_at	1.38194	0.466693	2.966	1.56852	29.2.1.2.1.9 protein.synthesis.ribosomal protein.eukaryotic.40S subunit.S9	at5g15200	40S ribosomal protein S9 (RPS9B)
259392_at	1.65701	0.728583	1.87326	0.905549	29.2.1.2.2.1 protein.synthesis.ribosomal protein.eukaryotic.60S subunit.L1	at1g06380	ribosomal protein-related
256385_at	1.56864	0.649511	2.1968	1.1354	29.2.1.2.2.10 protein.synthesis.ribosomal protein.eukaryotic.60S subunit.L10	at1g66580	60S ribosomal protein L10 (RPL10C)
261490_at	1.5031	0.587946	2.76437	1.46695	29.2.1.2.2.10 protein.synthesis.ribosomal protein.eukaryotic.60S subunit.L10	at1g14320	SAC52 (SUPPRESSOR OF ACAULIS 52); structural constituent of ribosome
263686_at	1.88874	0.917421	3.52298	1.8168	29.2.1.2.2.10 protein.synthesis.ribosomal protein.eukaryotic.60S subunit.L10	at1g26910	60S ribosomal protein L10 (RPL10B)
251552_at	2.00613	1.00442	4.71833	2.23828	29.2.1.2.2.11 protein.synthesis.ribosomal protein.eukaryotic.60S subunit.L11	at3g58700	60S ribosomal protein L11 (RPL11B)
254617_s_at	1.6851	0.752832	3.85945	1.9484	29.2.1.2.2.11 protein.synthesis.ribosomal protein.eukaryotic.60S subunit.L11 AND 29.2.1.2.2.16 protein.synthesis.ribosomal protein.eukaryotic.60S subunit.L16	MULTIPLE HITS	ATARD1 (ACIREDUCTONE DIOXYGENASE 1); acireductone dioxygenase [iron(II)-requiring]/ metal
247584_at	1.80403	0.851221	5.3752	2.42632	29.2.1.2.2.12 protein.synthesis.ribosomal protein.eukaryotic.60S subunit.L12	at5g60670	60S ribosomal protein L12 (RPL12C)
251938_at	1.27349	0.348785	1.74704	0.804909	29.2.1.2.2.12 protein.synthesis.ribosomal protein.eukaryotic.60S subunit.L12	at3g53430	60S ribosomal protein L12 (RPL12B)
265445_at	1.71329	0.776774	4.56868	2.19178	29.2.1.2.2.12 protein.synthesis.ribosomal protein.eukaryotic.60S subunit.L12	at2g37190	60S ribosomal protein L12 (RPL12A)
249815_at	1.4898	0.575116	3.71629	1.89386	29.2.1.2.2.13 protein.synthesis.ribosomal protein.eukaryotic.60S subunit.L13	at5g23900	60S ribosomal protein L13 (RPL13D)
252294_at	1.69087	0.757764	3.67454	1.87756	29.2.1.2.2.13 protein.synthesis.ribosomal protein.eukaryotic.60S subunit.L13	at3g49010	ATBBC1 (ARABIDOPSIS THALIANA BREAST BASIC CONSERVED 1); structural constituent of ribosome
258995_at	1.65385	0.725832	2.57645	1.36539	29.2.1.2.2.13 protein.synthesis.ribosomal protein.eukaryotic.60S subunit.L13	at3g01790	ribosomal protein L13 family protein
253901_at	1.58101	0.660846	3.43567	1.78059	29.2.1.2.2.14 protein.synthesis.ribosomal protein.eukaryotic.60S subunit.L14	at4g27090	60S ribosomal protein L14 (RPL14B)
263372_at	1.70335	0.768374	4.09493	2.03384	29.2.1.2.2.14 protein.synthesis.ribosomal protein.eukaryotic.60S subunit.L14	at2g20450	60S ribosomal protein L14 (RPL14A)
250973_at	1.72635	0.787722	3.43617	1.7808	29.2.1.2.2.141 protein.synthesis.ribosomal protein.eukaryotic.60S subunit.L4/L1	at5g02870	60S ribosomal protein L4/L1 (RPL4D)
258715_at	1.81574	0.860558	3.62369	1.85746	29.2.1.2.2.141 protein.synthesis.ribosomal protein.eukaryotic.60S subunit.L4/L1	at3g09630	60S ribosomal protein L4/L1 (RPL4A)
245342_at	1.57019	0.650941	3.02181	1.59541	29.2.1.2.2.15 protein.synthesis.ribosomal protein.eukaryotic.60S subunit.L15	at4g16720	60S ribosomal protein L15 (RPL15A)
245355_at	1.70515	0.769898	6.02933	2.592	29.2.1.2.2.15 protein.synthesis.ribosomal protein.eukaryotic.60S subunit.L15	at4g17390	60S ribosomal protein L15 (RPL15B)
263973_at	1.75018	0.807504	5.18732	2.37499	29.2.1.2.2.16 protein.synthesis.ribosomal protein.eukaryotic.60S subunit.L16	at2g42740	RPL16A; structural constituent of ribosome
264233_at	1.82381	0.866955	3.97175	1.98977	29.2.1.2.2.17 protein.synthesis.ribosomal protein.eukaryotic.60S subunit.L17	at1g67430	60S ribosomal protein L17 (RPL17B)
264438_at	1.90129	0.92698	5.03498	2.33199	29.2.1.2.2.17 protein.synthesis.ribosomal protein.eukaryotic.60S subunit.L17	at1g27400	60S ribosomal protein L17 (RPL17A)
250546_at	1.82323	0.866495	3.16	1.65992	29.2.1.2.2.1730 protein.synthesis.ribosomal protein.eukaryotic.60S subunit.L7/L30/S12 AND 29.2.2.3.1 protein.synthesis.ribosome biogenesis.Pre-rRNA processing and modifications.snoRNPs	at5g08180	ribosomal protein L7Ae/L30e/S12e/Gadd45 family protein
246758_at	1.74476	0.803028	4.18815	2.06631	29.2.1.2.2.18 protein.synthesis.ribosomal protein.eukaryotic.60S subunit.L18	at5g27850	60S ribosomal protein L18 (RPL18C)
258900_at	1.93236	0.950364	4.83049	2.27217	29.2.1.2.2.18 protein.synthesis.ribosomal protein.eukaryotic.60S subunit.L18	at3g05590	RPL18 (RIBOSOMAL PROTEIN L18); structural constituent of ribosome
255520_at	1.44449	0.530559	1.49655	0.58164	29.2.1.2.2.19 protein.synthesis.ribosomal protein.eukaryotic.60S subunit.L19	at4g02230	60S ribosomal protein L19 (RPL19C)
258410_at	2.18676	1.1288	5.56793	2.47714	29.2.1.2.2.19 protein.synthesis.ribosomal protein.eukaryotic.60S subunit.L19	at3g16780	60S ribosomal protein L19 (RPL19B)
262117_at	1.41439	0.500175	1.85971	0.89508	29.2.1.2.2.19 protein.synthesis.ribosomal protein.eukaryotic.60S subunit.L19	at1g02780	emb2386 (embryo defective 2386); structural constituent of ribosome
246379_s_at	1.44655	0.532614	3.23363	1.69316	29.2.1.2.2.21 protein.synthesis.ribosomal protein.eukaryotic.60S subunit.L21	MULTIPLE HITS	ATARD1 (ACIREDUCTONE DIOXYGENASE 1); acireductone dioxygenase [iron(II)-requiring]/ metal
264679_s_at	1.64536	0.718408	4.18117	2.06391	29.2.1.2.2.21 protein.synthesis.ribosomal protein.eukaryotic.60S subunit.L21	MULTIPLE HITS	ATARD1 (ACIREDUCTONE DIOXYGENASE 1); acireductone dioxygenase [iron(II)-requiring]/ metal
246745_at	1.42912	0.515127	2.81037	1.49076	29.2.1.2.2.22 protein.synthesis.ribosomal protein.eukaryotic.60S subunit.L22	at5g27770	60S ribosomal protein L22 (RPL22C)
259112_at	1.70861	0.77282	4.45135	2.15424	29.2.1.2.2.22 protein.synthesis.ribosomal protein.eukaryotic.60S subunit.L22	at3g05560	60S ribosomal protein L22-2 (RPL22B)
255789_at	1.79065	0.840482	5.96878	2.57743	29.2.1.2.2.23 protein.synthesis.ribosomal protein.eukaryotic.60S subunit.L23	at2g33370	60S ribosomal protein L23 (RPL23B)
263665_at	1.50905	0.593644	2.27311	1.18467	29.2.1.2.2.23 protein.synthesis.ribosomal protein.eukaryotic.60S subunit.L23	at1g04480	60S ribosomal protein L23 (RPL23A)
251997_at	1.39321	0.478409	2.11958	1.08378	29.2.1.2.2.24 protein.synthesis.ribosomal protein.eukaryotic.60S subunit.L24	at3g53020	STV1 (SHORT VALVE1); structural constituent of ribosome
265210_at	1.92075	0.941672	7.113	2.83046	29.2.1.2.2.24 protein.synthesis.ribosomal protein.eukaryotic.60S subunit.L24	at2g36620	RPL24A (ribosomal protein L24); structural constituent of ribosome
266822_at	1.78217	0.833638	2.40123	1.26377	29.2.1.2.2.24 protein.synthesis.ribosomal protein.eukaryotic.60S subunit.L24	at2g44860	60S ribosomal protein L24, putative
247010_at	1.4471	0.533167	2.74493	1.45677	29.2.1.2.2.26 protein.synthesis.ribosomal protein.eukaryotic.60S subunit.L26	at5g67510	60S ribosomal protein L26 (RPL26B)
252235_at	1.68061	0.748989	3.47448	1.7968	29.2.1.2.2.26 protein.synthesis.ribosomal protein.eukaryotic.60S subunit.L26	at3g49910	60S ribosomal protein L26 (RPL26A)
245372_at	1.64772	0.720471	5.23345	2.38776	29.2.1.2.2.27 protein.synthesis.ribosomal protein.eukaryotic.60S subunit.L27	at4g15000	60S ribosomal protein L27 (RPL27C)
256794_at	1.49148	0.57674	4.62824	2.21046	29.2.1.2.2.27 protein.synthesis.ribosomal protein.eukaryotic.60S subunit.L27	at3g22230	60S ribosomal protein L27 (RPL27B)
265730_at	1.62899	0.703974	2.91032	1.54118	29.2.1.2.2.27 protein.synthesis.ribosomal protein.eukaryotic.60S subunit.L27	at2g32220	60S ribosomal protein L27 (RPL27A)
253728_at	1.5898	0.668842	4.02254	2.00811	29.2.1.2.2.28 protein.synthesis.ribosomal protein.eukaryotic.60S subunit.L28	at4g29410	60S ribosomal protein L28 (RPL28C)
266699_at	1.51105	0.595552	3.73576	1.9014	29.2.1.2.2.28 protein.synthesis.ribosomal protein.eukaryotic.60S subunit.L28	at2g19730	60S ribosomal protein L28 (RPL28A)
258521_at	1.5302	0.613718	4.10565	2.03761	29.2.1.2.2.29 protein.synthesis.ribosomal protein.eukaryotic.60S subunit.L29	at3g06680	60S ribosomal protein L29 (RPL29B)
258532_at	1.70094	0.766333	4.36727	2.12673	29.2.1.2.2.29 protein.synthesis.ribosomal protein.eukaryotic.60S subunit.L29	at3g06700	60S ribosomal protein L29 (RPL29A)
264421_at	1.52211	0.606075	3.26577	1.70742	29.2.1.2.2.3 protein.synthesis.ribosomal protein.eukaryotic.60S subunit.L3	at1g43170	ARP1 (ARABIDOPSIS RIBOSOMAL PROTEIN 1); structural constituent of ribosome
265032_at	2.22456	1.15352	3.39145	1.7619	29.2.1.2.2.3 protein.synthesis.ribosomal protein.eukaryotic.60S subunit.L3	at1g61580	RPL3B (R-PROTEIN L3 B); structural constituent of ribosome
257753_at	1.31192	0.391681	2.60853	1.38324	29.2.1.2.2.30 protein.synthesis.ribosomal protein.eukaryotic.60S subunit.L30	at3g18740	60S ribosomal protein L30 (RPL30C)
262163_at	1.5435	0.626205	4.7998	2.26297	29.2.1.2.2.30 protein.synthesis.ribosomal protein.eukaryotic.60S subunit.L30	at1g77940	60S ribosomal protein L30 (RPL30B)
247978_at	1.66514	0.735647	4.43089	2.1476	29.2.1.2.2.31 protein.synthesis.ribosomal protein.eukaryotic.60S subunit.L31	at5g56710	60S ribosomal protein L31 (RPL31C)
254012_at	1.32843	0.409721	4.09212	2.03285	29.2.1.2.2.31 protein.synthesis.ribosomal protein.eukaryotic.60S subunit.L31	at4g26230	60S ribosomal protein L31 (RPL31B)
266700_at	1.6812	0.74949	2.98695	1.57868	29.2.1.2.2.31 protein.synthesis.ribosomal protein.eukaryotic.60S subunit.L31	at2g19740	60S ribosomal protein L31 (RPL31A)
254655_s_at	1.59996	0.678039	4.14949	2.05293	29.2.1.2.2.32 protein.synthesis.ribosomal protein.eukaryotic.60S subunit.L32	MULTIPLE HITS	ATARD1 (ACIREDUCTONE DIOXYGENASE 1); acireductone dioxygenase [iron(II)-requiring]/ metal
257141_at	1.86344	0.897968	6.40862	2.68001	29.2.1.2.2.34 protein.synthesis.ribosomal protein.eukaryotic.60S subunit.L34	at3g28900	60S ribosomal protein L34 (RPL34C)
260369_at	1.32951	0.410898	2.51462	1.33034	29.2.1.2.2.34 protein.synthesis.ribosomal protein.eukaryotic.60S subunit.L34	at1g69620	RPL34 (RIBOSOMAL PROTEIN L34); structural constituent of ribosome
263691_at	1.53973	0.622679	3.09202	1.62855	29.2.1.2.2.34 protein.synthesis.ribosomal protein.eukaryotic.60S subunit.L34	at1g26880	60S ribosomal protein L34 (RPL34A)
251018_at	1.94457	0.95945	4.79528	2.26161	29.2.1.2.2.36 protein.synthesis.ribosomal protein.eukaryotic.60S subunit.L36	at5g02450	60S ribosomal protein L36 (RPL36C)
267174_at	1.70486	0.769655	4.30494	2.10599	29.2.1.2.2.36 protein.synthesis.ribosomal protein.eukaryotic.60S subunit.L36	at2g37600	60S ribosomal protein L36 (RPL36A)
258284_at	1.81244	0.857935	4.79074	2.26025	29.2.1.2.2.37 protein.synthesis.ribosomal protein.eukaryotic.60S subunit.L37	at3g16080	60S ribosomal protein L37 (RPL37C)
259612_at	1.49021	0.575518	2.97259	1.57172	29.2.1.2.2.37 protein.synthesis.ribosomal protein.eukaryotic.60S subunit.L37	at1g52300	60S ribosomal protein L37 (RPL37B)
262594_at	2.04214	1.03008	3.42116	1.77449	29.2.1.2.2.37 protein.synthesis.ribosomal protein.eukaryotic.60S subunit.L37	at1g15250	60S ribosomal protein L37 (RPL37A)
251486_at	1.66764	0.737804	5.34948	2.4194	29.2.1.2.2.38 protein.synthesis.ribosomal protein.eukaryotic.60S subunit.L38	at3g59540	60S ribosomal protein L38 (RPL38B)
253482_at	1.67393	0.743239	4.12455	2.04424	29.2.1.2.2.39 protein.synthesis.ribosomal protein.eukaryotic.60S subunit.L39	at4g31985	60S ribosomal protein L39 (RPL39C)
263585_at	1.73285	0.793144	6.318	2.65947	29.2.1.2.2.39 protein.synthesis.ribosomal protein.eukaryotic.60S subunit.L39	at2g25210	60S ribosomal protein L39 (RPL39A)
263289_at	1.45664	0.542647	3.73279	1.90025	29.2.1.2.2.40 protein.synthesis.ribosomal protein.eukaryotic.60S subunit.L40	at2g36170	ubiquitin extension protein 2 (UBQ2) / 60S ribosomal protein L40 (RPL40A)
252056_at	1.39292	0.47811	2.64333	1.40236	29.2.1.2.2.40 protein.synthesis.ribosomal protein.eukaryotic.60S subunit.L40 AND 29.5.11 protein.degradation.ubiquitin	at3g52590	UBQ1 (UBIQUITIN EXTENSION PROTEIN 1); protein binding / structural constituent of ribosome
249466_at	2.06435	1.04569	4.21735	2.07634	29.2.1.2.2.5 protein.synthesis.ribosomal protein.eukaryotic.60S subunit.L5	at5g39740	60S ribosomal protein L5 (RPL5B)
257906_at	2.02957	1.02117	4.45678	2.156	29.2.1.2.2.5 protein.synthesis.ribosomal protein.eukaryotic.60S subunit.L5	at3g25520	ATL5 (A. THALIANA RIBOSOMAL PROTEIN L5); 5S rRNA binding / structural constituent of ribosome
249945_at	2.26995	1.18266	6.46763	2.69324	29.2.1.2.2.510 protein.synthesis.ribosomal protein.eukaryotic.60S subunit.L10A	at5g22440	60S ribosomal protein L10A (RPL10aC)
266210_at	1.62489	0.700338	4.64694	2.21628	29.2.1.2.2.510 protein.synthesis.ribosomal protein.eukaryotic.60S subunit.L10A	at2g27530	PGY1 (PIGGYBACK1); RNA binding / structural constituent of ribosome
248655_at	1.42709	0.513079	2.20278	1.13933	29.2.1.2.2.513 protein.synthesis.ribosomal protein.eukaryotic.60S subunit.L13A	at5g48760	60S ribosomal protein L13A (RPL13aD)
254763_at	1.67016	0.739984	2.87932	1.52573	29.2.1.2.2.513 protein.synthesis.ribosomal protein.eukaryotic.60S subunit.L13A	at4g13170	60S ribosomal protein L13A (RPL13aC)
257599_at	1.56019	0.641724	3.01171	1.59058	29.2.1.2.2.513 protein.synthesis.ribosomal protein.eukaryotic.60S subunit.L13A	at3g24830	60S ribosomal protein L13A (RPL13aB)
258837_at	1.687	0.754458	3.869	1.95196	29.2.1.2.2.513 protein.synthesis.ribosomal protein.eukaryotic.60S subunit.L13A	at3g07110	60S ribosomal protein L13A (RPL13aA)
258090_at	1.53279	0.616156	3.65593	1.87024	29.2.1.2.2.518 protein.synthesis.ribosomal protein.eukaryotic.60S subunit.L18A	at3g14600	60S ribosomal protein L18A (RPL18aC)
267007_at	1.53687	0.619996	3.54505	1.82581	29.2.1.2.2.518 protein.synthesis.ribosomal protein.eukaryotic.60S subunit.L18A	at2g34480	60S ribosomal protein L18A (RPL18aB)
251783_at	2.15762	1.10944	5.94642	2.57202	29.2.1.2.2.523 protein.synthesis.ribosomal protein.eukaryotic.60S subunit.L23A	at3g55280	RPL23AB (RIBOSOMAL PROTEIN L23AB); RNA binding / nucleotide binding / structural constituent of ribosome
266981_at	1.43724	0.523301	4.59034	2.1986	29.2.1.2.2.523 protein.synthesis.ribosomal protein.eukaryotic.60S subunit.L23A	at2g39460	RPL23AA (RIBOSOMAL PROTEIN L23AA); RNA binding / nucleotide binding / structural constituent of ribosome
262985_s_at	1.56588	0.646978	3.08705	1.62623	29.2.1.2.2.527 protein.synthesis.ribosomal protein.eukaryotic.60S subunit.L27A	at1g23290	RPL27AB; structural constituent of ribosome
251409_at	1.46302	0.548948	4.05009	2.01796	29.2.1.2.2.537 protein.synthesis.ribosomal protein.eukaryotic.60S subunit.L37A	at3g60245	60S ribosomal protein L37a (RPL37aC)
245121_at	1.77051	0.824168	4.69522	2.23119	29.2.1.2.2.57 protein.synthesis.ribosomal protein.eukaryotic.60S subunit.L7A	at2g47610	60S ribosomal protein L7A (RPL7aA)
246070_at	1.63862	0.712479	2.18469	1.12743	29.2.1.2.2.57 protein.synthesis.ribosomal protein.eukaryotic.60S subunit.L7A	at5g20160	ribosomal protein L7Ae/L30e/S12e/Gadd45 family protein
251185_at	1.63961	0.71335	3.55922	1.83156	29.2.1.2.2.57 protein.synthesis.ribosomal protein.eukaryotic.60S subunit.L7A	at3g62870	60S ribosomal protein L7A (RPL7aB)
254831_at	2.27991	1.18898	5.90121	2.56101	29.2.1.2.2.57 protein.synthesis.ribosomal protein.eukaryotic.60S subunit.L7A	at4g12600	ribosomal protein L7Ae/L30e/S12e/Gadd45 family protein
255776_at	2.16098	1.11168	5.67237	2.50395	29.2.1.2.2.6 protein.synthesis.ribosomal protein.eukaryotic.60S subunit.L6	at1g18540	60S ribosomal protein L6 (RPL6A)
260383_s_at	1.54375	0.626444	2.80382	1.48739	29.2.1.2.2.6 protein.synthesis.ribosomal protein.eukaryotic.60S subunit.L6	MULTIPLE HITS	ATARD1 (ACIREDUCTONE DIOXYGENASE 1); acireductone dioxygenase [iron(II)-requiring]/ metal
256648_at	1.60325	0.681004	2.71781	1.44245	29.2.1.2.2.7 protein.synthesis.ribosomal protein.eukaryotic.60S subunit.L7	at3g13580	60S ribosomal protein L7 (RPL7D)
261911_at	1.5883	0.667482	1.84676	0.884998	29.2.1.2.2.7 protein.synthesis.ribosomal protein.eukaryotic.60S subunit.L7	at1g80750	60S ribosomal protein L7 (RPL7A)
265736_at	1.67158	0.741213	4.46337	2.15813	29.2.1.2.2.7 protein.synthesis.ribosomal protein.eukaryotic.60S subunit.L7	at2g01250	60S ribosomal protein L7 (RPL7B)
267213_at	1.80632	0.853053	5.22011	2.38408	29.2.1.2.2.7 protein.synthesis.ribosomal protein.eukaryotic.60S subunit.L7	at2g44120	60S ribosomal protein L7 (RPL7C)
265805_s_at	1.44992	0.535973	2.34487	1.22951	29.2.1.2.2.8 protein.synthesis.ribosomal protein.eukaryotic.60S subunit.L8	MULTIPLE HITS	ATARD1 (ACIREDUCTONE DIOXYGENASE 1); acireductone dioxygenase [iron(II)-requiring]/ metal
245639_at	1.8471	0.885262	2.90323	1.53766	29.2.1.2.2.80 protein.synthesis.ribosomal protein.eukaryotic.60S subunit.P0	at1g25260	acidic ribosomal protein P0-related
256253_at	1.72125	0.783457	2.26735	1.181	29.2.1.2.2.80 protein.synthesis.ribosomal protein.eukaryotic.60S subunit.P0	at3g11250	60S acidic ribosomal protein P0 (RPP0C)
259006_at	1.73389	0.794011	3.36187	1.74926	29.2.1.2.2.80 protein.synthesis.ribosomal protein.eukaryotic.60S subunit.P0	at3g09200	60S acidic ribosomal protein P0 (RPP0B)
267349_at	2.59399	1.37517	5.51908	2.46443	29.2.1.2.2.80 protein.synthesis.ribosomal protein.eukaryotic.60S subunit.P0	at2g40010	60S acidic ribosomal protein P0 (RPP0A)
248768_at	1.61573	0.692188	4.93891	2.30419	29.2.1.2.2.81 protein.synthesis.ribosomal protein.eukaryotic.60S subunit.P1	at5g47700	60S acidic ribosomal protein P1 (RPP1C)
255657_at	1.50098	0.5859	4.08214	2.02932	29.2.1.2.2.81 protein.synthesis.ribosomal protein.eukaryotic.60S subunit.P1	at4g00810	60S acidic ribosomal protein P1 (RPP1B)
261578_at	1.7789	0.830986	3.52086	1.81593	29.2.1.2.2.81 protein.synthesis.ribosomal protein.eukaryotic.60S subunit.P1	at1g01100	60S acidic ribosomal protein P1 (RPP1A)
252643_at	2.07649	1.05415	3.93187	1.97522	29.2.1.2.2.82 protein.synthesis.ribosomal protein.eukaryotic.60S subunit.P2	at3g44590	60S acidic ribosomal protein P2 (RPP2D)
266256_at	1.74563	0.803747	5.39626	2.43196	29.2.1.2.2.82 protein.synthesis.ribosomal protein.eukaryotic.60S subunit.P2	at2g27710	60S acidic ribosomal protein P2 (RPP2B)
266258_at	1.5929	0.671659	4.23782	2.08332	29.2.1.2.2.82 protein.synthesis.ribosomal protein.eukaryotic.60S subunit.P2	at2g27720	60S acidic ribosomal protein P2 (RPP2A)
247900_at	1.49296	0.578175	2.98345	1.57698	29.2.1.2.2.83 protein.synthesis.ribosomal protein.eukaryotic.60S subunit.P3	at5g57290	60S acidic ribosomal protein P3 (RPP3B)
254030_at	1.82498	0.867878	4.84398	2.27619	29.2.1.2.2.83 protein.synthesis.ribosomal protein.eukaryotic.60S subunit.P3	at4g25890	60S acidic ribosomal protein P3 (RPP3A)
254980_at	2.23069	1.15749	6.04887	2.59667	29.2.1.2.2.9 protein.synthesis.ribosomal protein.eukaryotic.60S subunit.L9	at4g10450	60S ribosomal protein L9 (RPL90D)
261620_s_at	1.78807	0.838401	3.05695	1.61209	29.2.1.2.2.9 protein.synthesis.ribosomal protein.eukaryotic.60S subunit.L9	MULTIPLE HITS	ATARD1 (ACIREDUCTONE DIOXYGENASE 1); acireductone dioxygenase [iron(II)-requiring]/ metal
251538_at	2.39412	1.25949	3.38457	1.75897	29.2.1.2.2.99 protein.synthesis.ribosomal protein.eukaryotic.60S subunit.unknown	at3g58660	60S ribosomal protein-related
246527_at	1.8716	0.904276	1.87826	0.909395	29.2.1.99.1.4 protein.synthesis.ribosomal protein.unknown.small subunit.S4	at5g15750	RNA-binding S4 domain-containing protein
252287_at	1.6191	0.695191	2.37329	1.24689	29.2.1.99.1.9 protein.synthesis.ribosomal protein.unknown.small subunit.S9	at3g49080	ribosomal protein S9 family protein
252288_at	1.50503	0.589789	1.62734	0.702512	29.2.1.99.1.9 protein.synthesis.ribosomal protein.unknown.small subunit.S9	at3g49080	ribosomal protein S9 family protein
252850_at	1.36786	0.451926	1.926	0.945611	29.2.1.99.2.23 protein.synthesis.ribosomal protein.unknown.large subunit.L23	at4g39880	ribosomal protein L23 family protein
255759_at	1.48737	0.572761	1.93685	0.953709	29.2.1.99.99 protein.synthesis.ribosomal protein.unknown.unknown	at1g16790	ribosomal protein-related
245512_at	1.70071	0.766134	2.02465	1.01767	29.2.2 protein.synthesis.ribosome biogenesis	at4g15770	RNA binding / protein binding
249554_at	1.28596	0.36285	1.74155	0.800368	29.2.2 protein.synthesis.ribosome biogenesis	at5g38290	peptidyl-tRNA hydrolase family protein
262272_at	1.68066	0.749029	1.50644	0.591145	29.2.2 protein.synthesis.ribosome biogenesis	at1g42440	FUNCTIONS IN: molecular_function unknown; INVOLVED IN: ribosome biogenesis; LOCATED IN: nucleus; EXPRESSED IN: 22 plant structures; EXPRESSED DU
261314_at	1.62748	0.702636	2.22627	1.15463	29.2.2 protein.synthesis.ribosome biogenesis AND 30.5 signalling.G-proteins	at1g52980	GTP-binding family protein
256207_at	1.99877	0.999116	3.0673	1.61697	29.2.2.1 protein.synthesis.ribosome biogenesis.export from nucleus AND 30.5 signalling.G-proteins	at1g50920	GTP-binding protein-related
258545_at	3.10751	1.63576	5.32166	2.41188	29.2.2.1 protein.synthesis.ribosome biogenesis.export from nucleus AND 30.5 signalling.G-proteins	at3g07050	GTP-binding family protein
264948_at	1.58918	0.668281	1.56193	0.643333	29.2.2.2.1 protein.synthesis.ribosome biogenesis.Assembly factors.DExD-box helicases AND 29.2.2.3.5 protein.synthesis.ribosome biogenesis.Pre-rRNA processing and modifications.DExD-box helicases	at1g77030	DEAD/DEAH box helicase, putative; Identical to Putative DEAD-box ATP-dependent RNA helicase 29 (RH29) [Arabidopsis Thaliana] (GB:O49289); simila
260824_at	2.23439	1.15988	2.85138	1.51166	29.2.2.2.2 protein.synthesis.ribosome biogenesis.Assembly factors.GTPases AND 29.2.2.3.99 protein.synthesis.ribosome biogenesis.Pre-rRNA processing and modifications.misc	at1g06720	INVOLVED IN: ribosome biogenesis; LOCATED IN: nucleus; EXPRESSED IN: 21 plant structures; EXPRESSED DURING: 13 growth stages; CONTAINS InterPro
246623_at	2.13787	1.09617	2.25089	1.1705	29.2.2.3.1 protein.synthesis.ribosome biogenesis.Pre-rRNA processing and modifications.snoRNPs	at1g48920	ATNUC-L1, PARL1 ATNUC-L1; nucleic acid binding / nucleotide binding
247046_at	1.7527	0.809582	2.95038	1.5609	29.2.2.3.1 protein.synthesis.ribosome biogenesis.Pre-rRNA processing and modifications.snoRNPs	at5g66540	FUNCTIONS IN: molecular_function unknown; INVOLVED IN: rRNA processing; LOCATED IN: cytosol, nucleolus, nucleus; EXPRESSED IN: 22 plant structur
251667_at	2.3231	1.21605	4.06415	2.02296	29.2.2.3.1 protein.synthesis.ribosome biogenesis.Pre-rRNA processing and modifications.snoRNPs	at3g57150	NAP57 (Arabidopsis thaliana homologue of NAP57); pseudouridine synthase
258505_at	2.52835	1.3382	4.39257	2.13507	29.2.2.3.1 protein.synthesis.ribosome biogenesis.Pre-rRNA processing and modifications.snoRNPs	at3g06530	binding
259311_at	2.26955	1.18241	2.60843	1.38318	29.2.2.3.1 protein.synthesis.ribosome biogenesis.Pre-rRNA processing and modifications.snoRNPs	at3g05060	SAR DNA-binding protein, putative
259347_at	1.71055	0.774463	3.27003	1.7093	29.2.2.3.1 protein.synthesis.ribosome biogenesis.Pre-rRNA processing and modifications.snoRNPs	at3g03920	Gar1 RNA-binding region family protein
263371_at	1.9555	0.967541	2.53043	1.33939	29.2.2.3.1 protein.synthesis.ribosome biogenesis.Pre-rRNA processing and modifications.snoRNPs	at2g20490	NOP10; RNA binding
248036_at	1.90661	0.931012	2.13979	1.09747	29.2.2.3.3 protein.synthesis.ribosome biogenesis.Pre-rRNA processing and modifications.methylotransferases	at5g55920	nucleolar protein, putative
253975_at	1.5358	0.618994	1.59436	0.672975	29.2.2.3.3 protein.synthesis.ribosome biogenesis.Pre-rRNA processing and modifications.methylotransferases	at4g26600	nucleolar protein, putative
254079_at	2.86016	1.51609	3.89938	1.96325	29.2.2.3.3 protein.synthesis.ribosome biogenesis.Pre-rRNA processing and modifications.methylotransferases	at4g25730	FtsJ-like methyltransferase family protein
254080_at	3.01185	1.59065	5.53723	2.46917	29.2.2.3.3 protein.synthesis.ribosome biogenesis.Pre-rRNA processing and modifications.methylotransferases	at4g25630	FIB2 (FIBRILLARIN 2); snoRNA binding
257903_at	1.46913	0.554962	2.8865	1.52932	29.2.2.3.3 protein.synthesis.ribosome biogenesis.Pre-rRNA processing and modifications.methylotransferases	at3g28460	unknown protein
264222_at	1.42056	0.506457	1.98516	0.989252	29.2.2.3.3 protein.synthesis.ribosome biogenesis.Pre-rRNA processing and modifications.methylotransferases	at1g60230	radical SAM domain-containing protein
267562_at	1.63341	0.70789	2.74355	1.45604	29.2.2.3.3 protein.synthesis.ribosome biogenesis.Pre-rRNA processing and modifications.methylotransferases	at2g39670	radical SAM domain-containing protein
246457_at	1.76179	0.817045	1.58282	0.662497	29.2.2.3.4 protein.synthesis.ribosome biogenesis.Pre-rRNA processing and modifications.WD-repeat proteins	at5g16750	TOZ (TORMOZEMBRYO DEFECTIVE); nucleotide binding
250222_at	2.20068	1.13795	2.75932	1.46431	29.2.2.3.4 protein.synthesis.ribosome biogenesis.Pre-rRNA processing and modifications.WD-repeat proteins	at5g14050	transducin family protein / WD-40 repeat family protein
255278_at	1.98122	0.98639	2.26743	1.18106	29.2.2.3.4 protein.synthesis.ribosome biogenesis.Pre-rRNA processing and modifications.WD-repeat proteins	at4g04940	transducin family protein / WD-40 repeat family protein
258166_at	1.50793	0.592569	1.81343	0.858717	29.2.2.3.4 protein.synthesis.ribosome biogenesis.Pre-rRNA processing and modifications.WD-repeat proteins	at3g21540	transducin family protein / WD-40 repeat family protein
263824_at	1.97489	0.981772	2.04054	1.02895	29.2.2.3.4 protein.synthesis.ribosome biogenesis.Pre-rRNA processing and modifications.WD-repeat proteins	at2g40360	transducin family protein / WD-40 repeat family protein
247608_at	1.47974	0.565347	1.66278	0.733601	29.2.2.3.5 protein.synthesis.ribosome biogenesis.Pre-rRNA processing and modifications.DExD-box helicases	at5g60990	DEAD/DEAH box helicase, putative (RH10)
255749_at	1.60555	0.683066	2.22519	1.15393	29.2.2.3.5 protein.synthesis.ribosome biogenesis.Pre-rRNA processing and modifications.DExD-box helicases	at1g31970	STRS1 (STRESS RESPONSE SUPPRESSOR 1); ATP binding / ATP-dependent helicase/ helicase/ nucleic acid binding
262706_at	1.64773	0.720478	1.47823	0.563872	29.2.2.3.5 protein.synthesis.ribosome biogenesis.Pre-rRNA processing and modifications.DExD-box helicases	at1g16280	DEAD/DEAH box helicase, putative
266501_at	1.44004	0.526106	1.68096	0.749288	29.2.2.3.5 protein.synthesis.ribosome biogenesis.Pre-rRNA processing and modifications.DExD-box helicases	at2g06990	HEN2 (hua enhancer 2); ATP-dependent helicase/ RNA helicase
258316_at	2.28298	1.19092	2.48301	1.31209	29.2.2.3.99 protein.synthesis.ribosome biogenesis.Pre-rRNA processing and modifications.misc	at3g22660	rRNA processing protein-related
251776_at	1.46974	0.555563	1.36375	0.447579	29.2.2.3.99 protein.synthesis.ribosome biogenesis.Pre-rRNA processing and modifications.misc AND 29.2.3 protein.synthesis.initiation	at3g55620	emb1624 (embryo defective 1624); ribosome binding / translation initiation factor
247497_at	1.7386	0.797929	2.39206	1.25825	29.2.2.50 protein.synthesis.ribosome biogenesis.BRIX	at5g61770	PPAN (PETER PAN-LIKE PROTEIN)
255586_at	1.70615	0.770742	2.22063	1.15097	29.2.2.50 protein.synthesis.ribosome biogenesis.BRIX	at4g01560	MEE49 (maternal effect embryo arrest 49)
258104_at	1.81746	0.861921	1.96129	0.971805	29.2.2.50 protein.synthesis.ribosome biogenesis.BRIX	at3g23620	brix domain-containing protein
258396_at	1.81506	0.860017	2.19029	1.13112	29.2.2.50 protein.synthesis.ribosome biogenesis.BRIX	at3g15460	brix domain-containing protein
260157_at	2.23852	1.16255	3.98012	1.99281	29.2.2.50 protein.synthesis.ribosome biogenesis.BRIX	at1g52930	brix domain-containing protein
260323_at	1.47488	0.5606	1.44726	0.533327	29.2.2.50 protein.synthesis.ribosome biogenesis.BRIX	at1g63780	IMP4
246865_s_at	1.38342	0.468237	1.69052	0.757468	29.2.3 protein.synthesis.initiation	MULTIPLE HITS	ATARD1 (ACIREDUCTONE DIOXYGENASE 1); acireductone dioxygenase [iron(II)-requiring]/ metal
247839_at	1.37219	0.456477	1.2643	0.33834	29.2.3 protein.synthesis.initiation	at5g57870	eukaryotic translation initiation factor 4F, putative / eIF-4F, putative
249948_at	1.43664	0.522697	1.72454	0.786213	29.2.3 protein.synthesis.initiation	at5g19210	DEAD/DEAH box helicase, putative
250779_at	1.41741	0.503255	1.44848	0.534543	29.2.3 protein.synthesis.initiation	at5g05470	EIF2 ALPHA; RNA binding / translation initiation factor
251628_at	1.7353	0.795188	2.78877	1.47963	29.2.3 protein.synthesis.initiation	at3g57290	EIF3E (EUKARYOTIC TRANSLATION INITIATION FACTOR 3E); translation initiation factor
251738_at	1.60099	0.678962	1.87888	0.909874	29.2.3 protein.synthesis.initiation	at3g56150	EIF3C (EUKARYOTIC TRANSLATION INITIATION FACTOR 3C); translation initiation factor
253336_at	1.33752	0.419563	1.83575	0.876371	29.2.3 protein.synthesis.initiation	at4g33250	EIF3K (EUKARYOTIC TRANSLATION INITIATION FACTOR 3K); translation initiation factor
253583_at	1.50379	0.588604	2.04194	1.02994	29.2.3 protein.synthesis.initiation	at4g30680	MA3 domain-containing protein
254873_at	1.5534	0.635431	2.53089	1.33964	29.2.3 protein.synthesis.initiation	at4g11420	EIF3A (EUKARYOTIC TRANSLATION INITIATION FACTOR 3A); translation initiation factor
256523_at	1.2504	0.322387	1.4423	0.52837	29.2.3 protein.synthesis.initiation	at1g66070	translation initiation factor-related
258210_at	1.49162	0.57688	2.83936	1.50556	29.2.3 protein.synthesis.initiation	at3g13920	EIF4A1 (EUKARYOTIC TRANSLATION INITIATION FACTOR 4A1); ATP-dependent helicase/ translation initiation factor
259238_at	1.45793	0.543923	1.99087	0.993402	29.2.3 protein.synthesis.initiation	at3g11400	eukaryotic translation initiation factor 3G / eIF3g
259891_at	2.02469	1.0177	3.13656	1.64918	29.2.3 protein.synthesis.initiation	at1g72730	eukaryotic translation initiation factor 4A, putative / eIF-4A, putative
260099_at	1.29067	0.36812	1.50536	0.59011	29.2.3 protein.synthesis.initiation	at1g73180	eukaryotic translation initiation factor-related
262790_at	1.34561	0.42826	2.01655	1.01189	29.2.3 protein.synthesis.initiation	at1g10840	TIF3H1; translation initiation factor
262956_at	1.48592	0.571355	1.31487	0.394921	29.2.3 protein.synthesis.initiation	at1g54270	EIF4A-2; ATP-dependent helicase/ translation initiation factor
263835_at	1.33402	0.415777	2.04497	1.03208	29.2.3 protein.synthesis.initiation	at2g40290	eukaryotic translation initiation factor 2 subunit 1, putative / eIF-2A, putative / eIF-2-alpha, putative
264327_at	1.54107	0.623931	2.45004	1.2928	29.2.3 protein.synthesis.initiation	at1g04170	EIF2 GAMMA; translation factor, nucleic acid binding / translation initiation factor
266567_at	1.58683	0.66615	3.02056	1.59481	29.2.3 protein.synthesis.initiation	at2g24050	MIF4G domain-containing protein / MA3 domain-containing protein
266575_at	1.56038	0.641896	4.03159	2.01135	29.2.3 protein.synthesis.initiation	at2g24060	translation initiation factor 3 (IF-3) family protein
245949_at	1.68286	0.750919	2.9421	1.55685	29.2.4 protein.synthesis.elongation	at5g19510	elongation factor 1B alpha-subunit 2 (eEF1Balpha2)
247644_s_at	1.39412	0.479358	1.58823	0.667418	29.2.4 protein.synthesis.elongation	MULTIPLE HITS	ATARD1 (ACIREDUCTONE DIOXYGENASE 1); acireductone dioxygenase [iron(II)-requiring]/ metal
254981_at	1.71701	0.779902	3.68773	1.88273	29.2.4 protein.synthesis.elongation	at4g10480	nascent polypeptide associated complex alpha chain protein, putative / alpha-NAC, putative
255455_at	1.56692	0.647929	1.94036	0.956325	29.2.4 protein.synthesis.elongation	at4g02930	elongation factor Tu, putative / EF-Tu, putative
256241_at	1.32302	0.403834	2.08222	1.05812	29.2.4 protein.synthesis.elongation	at3g12390	nascent polypeptide associated complex alpha chain protein, putative / alpha-NAC, putative
260786_s_at	1.44727	0.533333	1.8553	0.891652	29.2.4 protein.synthesis.elongation	MULTIPLE HITS	ATARD1 (ACIREDUCTONE DIOXYGENASE 1); acireductone dioxygenase [iron(II)-requiring]/ metal
262017_at	1.62437	0.699884	2.67409	1.41905	29.2.4 protein.synthesis.elongation	at1g35550	elongation factor Tu C-terminal domain-containing protein
262064_at	1.40742	0.493049	1.82488	0.867803	29.2.4 protein.synthesis.elongation	at1g56070	LOS1; copper ion binding / translation elongation factor/ translation factor, nucleic acid binding
264670_s_at	1.47648	0.56216	1.83787	0.878035	29.2.4 protein.synthesis.elongation	MULTIPLE HITS	ATARD1 (ACIREDUCTONE DIOXYGENASE 1); acireductone dioxygenase [iron(II)-requiring]/ metal
251193_at	1.49443	0.579592	1.99633	0.997347	29.2.5 protein.synthesis.release	at3g62910	APG3 (ALBINO AND PALE GREEN); translation release factor/ translation release factor, codon specific
261204_s_at	1.33835	0.420457	1.56636	0.647416	29.2.5 protein.synthesis.release	MULTIPLE HITS	ATARD1 (ACIREDUCTONE DIOXYGENASE 1); acireductone dioxygenase [iron(II)-requiring]/ metal
266093_at	1.96946	0.977802	2.56779	1.36053	29.2.6 protein.synthesis.ribosomal RNA	at2g37990	ribosome biogenesis regulatory protein (RRS1) family protein
250066_at	1.44939	0.535444	1.82807	0.870318	29.2.99 protein.synthesis.misc	at5g17930	binding / protein binding
246112_at	1.3665	0.450481	1.96906	0.97751	29.3.1 protein.targeting.nucleus	at5g20200	nucleoporin-related
249067_at	1.60819	0.685435	1.8517	0.888848	29.3.1 protein.targeting.nucleus	at5g43960	nuclear transport factor 2 (NTF2) family protein / RNA recognition motif (RRM)-containing protein
249354_at	1.95628	0.968115	2.61212	1.38522	29.3.1 protein.targeting.nucleus	at5g40480	EMB3012 (embryo defective 3012)
251495_at	1.3388	0.420938	1.41751	0.503354	29.3.1 protein.targeting.nucleus	at3g59020	binding / protein transporter
253881_at	1.85133	0.888565	1.77176	0.825179	29.3.1 protein.targeting.nucleus	at4g27640	importin beta-2 subunit family protein
256070_at	1.99622	0.997273	2.79332	1.48198	29.3.1 protein.targeting.nucleus	at1g13730	nuclear transport factor 2 (NTF2) family protein / RNA recognition motif (RRM)-containing protein
260338_at	1.49886	0.58387	1.5244	0.608244	29.3.1 protein.targeting.nucleus	at1g69250	nuclear transport factor 2 (NTF2) family protein / RNA recognition motif (RRM)-containing protein
263448_at	1.3998	0.485226	1.52884	0.612436	29.3.1 protein.targeting.nucleus	at2g31660	SAD2 (SUPER SENSITIVE TO ABA AND DROUGHT2); binding / protein transporter
253981_at	1.52877	0.612368	1.77001	0.823757	29.3.2 protein.targeting.mitochondria	at4g26670	mitochondrial import inner membrane translocase subunit Tim17/Tim22/Tim23 family protein
256628_at	1.4985	0.583516	2.41598	1.27261	29.3.2 protein.targeting.mitochondria	at3g20000	TOM40; P-P-bond-hydrolysis-driven protein transmembrane transporter/ voltage-gated anion channel
259326_at	1.35798	0.441459	1.71085	0.774711	29.3.2 protein.targeting.mitochondria	at3g16480	MPPalpha (mitochondrial processing peptidase alpha subunit); catalytic/ metal ion binding / metalloendopeptidase/ zinc ion b
263778_at	1.39278	0.477963	1.7161	0.779135	29.3.2 protein.targeting.mitochondria	at2g46470	OXA1L (INNER MEMBRANE PROTEIN OXA1-LIKE)
263939_at	1.53592	0.619106	1.72111	0.783338	29.3.2 protein.targeting.mitochondria	at2g36070	ATTIM44-2; protein-transmembrane transporting ATPase
264490_at	1.45856	0.544548	1.43168	0.517712	29.3.2 protein.targeting.mitochondria	at1g27390	TOM20-2 (TRANSLOCASE OUTER MEMBRANE 20-2); P-P-bond-hydrolysis-driven protein transmembrane transporter/ metal ion binding
261664_s_at	1.56089	0.642369	1.67498	0.744148	29.3.2 protein.targeting.mitochondria AND 34.9 transport.metabolite transporters at the mitochondrial membrane	MULTIPLE HITS	ATARD1 (ACIREDUCTONE DIOXYGENASE 1); acireductone dioxygenase [iron(II)-requiring]/ metal
250080_at	1.59529	0.673821	2.24547	1.16702	29.3.3 protein.targeting.chloroplast	at5g16620	TIC40
252492_at	1.47483	0.560544	2.14995	1.1043	29.3.3 protein.targeting.chloroplast	at3g46740	TOC75-III (TRANSLOCON AT THE OUTER ENVELOPE MEMBRANE OF CHLOROPLASTS 75-III); P-P-bond-hydrolysis-driven protein transmembr
255482_at	1.45052	0.536568	2.23399	1.15962	29.3.3 protein.targeting.chloroplast	at4g02510	TOC159 (TRANSLOCON AT THE OUTER ENVELOPE MEMBRANE OF CHLOROPLASTS 159); transmembrane receptor
258214_at	1.61943	0.695485	1.70679	0.771284	29.3.3 protein.targeting.chloroplast	at3g17970	atToc64-III (Arabidopsis thaliana translocon at the outer membrane of chloroplasts 64-III); binding / carbon-nitrogen lig
258215_at	2.01961	1.01407	3.49098	1.80363	29.3.3 protein.targeting.chloroplast	at3g17970	atToc64-III (Arabidopsis thaliana translocon at the outer membrane of chloroplasts 64-III); binding / carbon-nitrogen lig
260815_at	2.20683	1.14198	5.85204	2.54894	29.3.3 protein.targeting.chloroplast	at1g06950	TIC110 (TRANSLOCON AT THE INNER ENVELOPE MEMBRANE OF CHLOROPLASTS 110)
266463_at	1.53463	0.617886	1.8626	0.897318	29.3.3 protein.targeting.chloroplast	at2g47840	tic20 protein-related
264121_at	1.47354	0.559285	4.3647	2.12588	29.3.3 protein.targeting.chloroplast AND 30.5 signalling.G-proteins	at1g02280	TOC33 (TRANSLOCON AT THE OUTER ENVELOPE MEMBRANE OF CHLOROPLASTS 33); GTP binding / GTPase/ protein binding
250768_at	1.35518	0.438485	1.62932	0.704268	29.3.4.99 protein.targeting.secretory pathway.unspecified	at5g05670	signal recognition particle binding
252080_at	1.2537	0.326191	1.51558	0.599868	29.3.4.99 protein.targeting.secretory pathway.unspecified	at3g51670	SEC14 cytosolic factor family protein / phosphoglyceride transfer family protein
261563_at	1.67075	0.740496	1.9221	0.942681	29.3.4.99 protein.targeting.secretory pathway.unspecified	at1g01630	SEC14 cytosolic factor, putative / phosphoglyceride transfer protein, putative
263226_at	1.97371	0.980907	2.36033	1.23899	29.3.4.99 protein.targeting.secretory pathway.unspecified	at1g30690	SEC14 cytosolic factor family protein / phosphoglyceride transfer family protein
263765_at	2.07393	1.05237	4.4322	2.14802	29.3.4.99 protein.targeting.secretory pathway.unspecified	at2g21540	SFH3 (SEC14-LIKE 3); phosphatidylinositol transporter
252576_s_at	2.17476	1.12086	3.10036	1.63243	29.3.99 protein.targeting.unknown AND 29.5.5 protein.degradation.serine protease	MULTIPLE HITS	ATARD1 (ACIREDUCTONE DIOXYGENASE 1); acireductone dioxygenase [iron(II)-requiring]/ metal
245458_at	1.34341	0.425895	1.54278	0.625535	29.4 protein.postranslational modification	at4g16970	ATP binding / kinase/ protein kinase/ protein serine/threonine kinase
248249_at	1.33865	0.420778	1.19937	0.262277	29.4 protein.postranslational modification	at5g53140	protein phosphatase 2C, putative / PP2C, putative
250428_at	1.50962	0.594185	1.93423	0.951761	29.4 protein.postranslational modification	at5g10480	PAS2 (PASTICCINO 2); enoyl-CoA hydratase/ protein tyrosine phosphatase
250981_at	1.34184	0.424209	1.622	0.697773	29.4 protein.postranslational modification	at5g03140	lectin protein kinase family protein
251059_at	1.36479	0.448679	1.534	0.617302	29.4 protein.postranslational modification	at5g01810	CIPK15 (CBL-INTERACTING PROTEIN KINASE 15); kinase/ protein kinase
252105_at	1.55474	0.636671	2.64428	1.40288	29.4 protein.postranslational modification	at3g51470	protein phosphatase 2C, putative / PP2C, putative
255298_at	2.20246	1.13912	10.83	3.43695	29.4 protein.postranslational modification	at4g04840	methionine sulfoxide reductase domain-containing protein / SeIR domain-containing protein
257024_at	1.83545	0.876133	1.40013	0.485564	29.4 protein.postranslational modification	at3g19100	calcium-dependent protein kinase, putative / CDPK, putative
258155_at	2.66153	1.41226	10.6364	3.41094	29.4 protein.postranslational modification	at3g18130	RACK1C_AT (RECEPTOR FOR ACTIVATED C KINASE 1 C); nucleotide binding
259859_at	1.30093	0.379547	1.38993	0.475009	29.4 protein.postranslational modification	at1g68410	protein phosphatase 2C-related / PP2C-related
261427_at	1.48094	0.56651	1.32918	0.41054	29.4 protein.postranslational modification	at1g18670	IBS1 (IMPAIRED IN BABA-INDUCED STERILITY 1); ATP binding / kinase/ protein kinase/ protein serine/threonine kinase/ protein tyro
264266_at	1.4548	0.540818	2.18978	1.13079	29.4 protein.postranslational modification	at1g09160	protein phosphatase 2C-related / PP2C-related
265010_at	1.29646	0.374579	1.44807	0.534132	29.4 protein.postranslational modification	at1g24510	T-complex protein 1 epsilon subunit, putative / TCP-1-epsilon, putative / chaperonin, putative
265886_at	1.38677	0.471733	1.30898	0.388446	29.4 protein.postranslational modification	at2g25620	protein phosphatase 2C, putative / PP2C, putative
266812_at	1.38308	0.467885	1.53767	0.620742	29.4 protein.postranslational modification	at2g44830	protein kinase, putative
267200_at	1.3468	0.429532	1.30457	0.383574	29.4 protein.postranslational modification	at2g31010	protein kinase family protein
267613_at	1.31475	0.394789	1.28279	0.359283	29.4 protein.postranslational modification	at2g26700	PID2 (PINOID2); ATP binding / kinase/ protein kinase
249985_at	1.49131	0.576584	2.89026	1.5312	29.4.1.55 protein.postranslational modification.kinase.receptor like cytoplasmatic kinase V	at5g18500	protein kinase family protein
266946_at	1.92418	0.944244	3.07399	1.62011	29.4.1.56 protein.postranslational modification.kinase.receptor like cytoplasmatic kinase VI	at2g18890	protein kinase family protein
245142_at	1.51859	0.60273	1.99792	0.998501	29.5 protein.degradation	at2g45270	glycoprotease M22 family protein
246307_at	1.70112	0.766488	3.02029	1.59469	29.5 protein.degradation	at3g51800	ATG2; aminopeptidase/ metalloexopeptidase
246654_s_at	1.2755	0.351066	1.74706	0.804933	29.5 protein.degradation	MULTIPLE HITS	ATARD1 (ACIREDUCTONE DIOXYGENASE 1); acireductone dioxygenase [iron(II)-requiring]/ metal
249782_at	1.27562	0.351204	1.32105	0.401686	29.5 protein.degradation	at5g24260	prolyl oligopeptidase family protein
253005_at	1.53759	0.620667	2.69933	1.4326	29.5 protein.degradation	at4g38100	unknown protein
255569_at	1.37538	0.45983	1.36707	0.451092	29.5 protein.degradation	at4g01320	ATSTE24; endopeptidase/ metalloendopeptidase
260817_at	1.53047	0.613978	1.82517	0.868032	29.5 protein.degradation	at1g06900	catalytic/ metal ion binding / metalloendopeptidase/ zinc ion binding
261602_at	1.6586	0.729969	2.25573	1.1736	29.5 protein.degradation	at1g49630	ATPREP2 (ARABIDOPSIS THALIANA PRESEQUENCE PROTEASE 2); catalytic/ metal ion binding / metalloendopeptidase/ metallopeptidase/
248427_at	1.44416	0.530229	2.42349	1.27709	29.5.1 protein.degradation.subtilases	at5g51750	ATSBT1.3 (ARABIDOPSIS THALIANA SUBTILASE 1.3); identical protein binding / serine-type endopeptidase
249059_at	1.43597	0.522022	2.91733	1.54465	29.5.1 protein.degradation.subtilases	at5g44530	subtilase family protein
254466_at	1.42787	0.513868	2.01453	1.01044	29.5.1 protein.degradation.subtilases	at4g20430	subtilase family protein
261653_at	1.51898	0.603107	2.47888	1.30969	29.5.1 protein.degradation.subtilases	at1g01900	SBTI1.1; serine-type endopeptidase
264319_at	1.71884	0.781438	2.47044	1.30477	29.5.1 protein.degradation.subtilases	at1g04110	SDD1 (STOMATAL DENSITY AND DISTRIBUTION); serine-type endopeptidase
266768_s_at	1.39307	0.478266	2.48093	1.31088	29.5.11 protein.degradation.ubiquitin	MULTIPLE HITS	ATARD1 (ACIREDUCTONE DIOXYGENASE 1); acireductone dioxygenase [iron(II)-requiring]/ metal
258871_at	1.60216	0.680017	1.5794	0.659375	29.5.11.20 protein.degradation.ubiquitin.proteasom	at3g03060	ATP binding / ATPase/ nucleoside-triphosphatase/ nucleotide binding
259123_at	1.46164	0.547589	2.13577	1.09475	29.5.11.20 protein.degradation.ubiquitin.proteasom	at3g02200	proteasome family protein
267338_at	1.50397	0.58878	1.84535	0.883895	29.5.11.20 protein.degradation.ubiquitin.proteasom	at2g39990	EIF2; translation initiation factor
245264_at	1.54856	0.630928	4.91246	2.29645	29.5.11.4.2 protein.degradation.ubiquitin.E3.RING	at4g17245	zinc finger (C3HC4-type RING finger) family protein
248759_at	1.60478	0.682379	2.44347	1.28893	29.5.11.4.2 protein.degradation.ubiquitin.E3.RING	at5g47610	zinc finger (C3HC4-type RING finger) family protein
255670_at	1.32223	0.402972	0.725119	-0.46371	29.5.11.4.2 protein.degradation.ubiquitin.E3.RING	at4g00335	RHB1A; protein binding / zinc ion binding
264770_at	1.51079	0.5953	2.66333	1.41323	29.5.11.4.2 protein.degradation.ubiquitin.E3.RING	at1g23030	armadillo/beta-catenin repeat family protein / U-box domain-containing protein
253364_at	1.59596	0.674423	1.70772	0.772068	29.5.11.4.3.2 protein.degradation.ubiquitin.E3.SCF.FBOX	at4g33160	ubiquitin-protein ligase
252367_at	1.44075	0.526819	2.34135	1.22734	29.5.11.4.5.2 protein.degradation.ubiquitin.E3.BTB/POZ Cullin3.BTB/POZ	at3g48360	BT2 (BTB AND TAZ DOMAIN PROTEIN 2); protein binding / transcription factor/ transcription regulator
257697_at	1.61903	0.695131	2.59919	1.37806	29.5.4 protein.degradation.aspartate protease	at3g12700	aspartyl protease family protein
267592_at	1.54743	0.629876	1.45934	0.545318	29.5.4 protein.degradation.aspartate protease	at2g39710	aspartyl protease family protein
249396_at	1.27211	0.347221	1.59145	0.670345	29.5.5 protein.degradation.serine protease	at5g40200	DegP9 (DegP protease 9); catalytic/ protein binding / serine-type endopeptidase/ serine-type peptidase
249847_at	1.52577	0.609535	1.65847	0.729856	29.5.5 protein.degradation.serine protease	at5g23210	SCPL34; serine-type carboxypeptidase
258633_at	1.56791	0.648838	1.70413	0.769036	29.5.5 protein.degradation.serine protease	at3g07990	SCPL27 (serine carboxypeptidase-like 27); serine-type carboxypeptidase
258857_at	1.37738	0.46193	1.68288	0.750935	29.5.5 protein.degradation.serine protease	at3g02110	scpl25 (serine carboxypeptidase-like 25); serine-type carboxypeptidase
260739_at	1.43542	0.521473	1.64845	0.721111	29.5.5 protein.degradation.serine protease	at1g15000	scpl50 (serine carboxypeptidase-like 50); serine-type carboxypeptidase
262823_at	1.34128	0.423612	1.55556	0.637434	29.5.5 protein.degradation.serine protease	at1g11750	CLPP6; serine-type endopeptidase
254181_at	1.6982	0.764009	3.24757	1.69936	29.5.7 protein.degradation.metalloprotease	at4g23940	FtsH protease, putative
258585_at	1.37759	0.462148	2.12149	1.08508	29.5.7 protein.degradation.metalloprotease	at3g04340	emb2458 (embryo defective 2458); ATP binding / ATPase/ metalloendopeptidase/ nucleoside-triphosphatase/ nucleotide binding
259363_at	1.60882	0.686002	2.41988	1.27494	29.5.7 protein.degradation.metalloprotease	at1g13270	MAP1C (METHIONINE AMINOPEPTIDASE 1B); aminopeptidase/ metalloexopeptidase
262937_at	2.04445	1.03171	3.57677	1.83866	29.5.7 protein.degradation.metalloprotease	at1g79560	FTSH12 (FTSH PROTEASE 12); ATP-dependent peptidase/ ATPase/ metallopeptidase
247235_at	1.67347	0.742844	2.53267	1.34066	29.5.9 protein.degradation.AAA type	at5g64580	AAA-type ATPase family protein
254027_at	1.36232	0.446061	1.43361	0.51965	29.5.9 protein.degradation.AAA type	at4g25835	AAA-type ATPase family protein
255308_at	1.30846	0.387869	1.74835	0.805997	29.5.9 protein.degradation.AAA type	at4g04910	NSF (N-ethylmaleimide sensitive factor); ATP binding / binding / nucleoside-triphosphatase/ nucleotide binding
264027_at	1.73813	0.797534	1.54541	0.62799	29.5.9 protein.degradation.AAA type	at2g03670	CDC48B; ATP binding / ATPase/ nucleoside-triphosphatase/ nucleotide binding
245164_at	2.00742	1.00534	2.3466	1.23057	29.6 protein.folding	at2g33210	HSP60-2 (HEAT SHOCK PROTEIN 60-2); ATP binding
246191_at	1.36033	0.443961	1.45107	0.537118	29.6 protein.folding	at5g20890	chaperonin, putative
246830_at	1.42166	0.50758	1.53868	0.621696	29.6 protein.folding	at5g26360	chaperonin, putative
248094_at	1.63974	0.713464	6.02459	2.59086	29.6 protein.folding	at5g55220	trigger factor type chaperone family protein
249977_at	1.64157	0.715079	1.4126	0.498354	29.6 protein.folding	at5g18820	EMB3007 (embryo defective 3007); ATP binding / protein binding
250061_at	1.64615	0.719096	3.66659	1.87444	29.6 protein.folding	at5g17710	EMB1241 (embryo defective 1241); adenyl-nucleotide exchange factor/ chaperone binding / protein binding / protein homodimeriz
254076_at	2.014	1.01007	2.3037	1.20395	29.6 protein.folding	at4g25340	immunophilin-related / FKBP-type peptidyl-prolyl cis-trans isomerase-related
256230_at	1.50953	0.594103	1.39662	0.481935	29.6 protein.folding	at3g12340	FK506 binding / peptidyl-prolyl cis-trans isomerase
256905_at	1.73599	0.795755	2.21926	1.15008	29.6 protein.folding	at3g23990	HSP60 (HEAT SHOCK PROTEIN 60); ATP binding
256983_at	1.52404	0.607896	5.00328	2.32287	29.6 protein.folding	at3g13470	chaperonin, putative
257125_at	1.25846	0.331656	1.44999	0.536039	29.6 protein.folding	at3g20050	ATTCP-1; ATP binding / protein binding / unfolded protein binding
257608_at	1.56787	0.648806	1.23361	0.302888	29.6 protein.folding	at3g13860	HSP60-3A (HEAT SHOCK PROTEIN 60-3A); ATP binding / protein binding
258152_at	1.42055	0.506452	1.67262	0.742112	29.6 protein.folding	at3g18190	chaperonin, putative
258482_at	1.45075	0.536803	1.47223	0.558006	29.6 protein.folding	at3g02530	chaperonin, putative
258776_at	1.60792	0.685192	1.86326	0.897827	29.6 protein.folding	at3g11830	chaperonin, putative
258816_at	1.64546	0.718491	1.98603	0.989889	29.6 protein.folding	at3g03960	chaperonin, putative
265776_at	1.71808	0.780796	3.10621	1.63515	29.6 protein.folding	at2g07340	prefoldin-related KE2 family protein
251626_at	1.37463	0.459041	1.94554	0.960174	29.7 protein.glycosylation	at3g57220	UDP-GlcNAc:dolichol phosphate N-acetylglucosamine-1-phosphate transferase, putative
264793_at	1.32794	0.409188	1.31828	0.39866	29.7 protein.glycosylation	at1g08660	glycosyl transferase family 29 protein / sialyltransferase family protein
249411_at	1.34397	0.426496	1.48986	0.575178	3.1.2.1 minor CHO metabolism.raffinose family.raffinose synthases.known	at5g40390	SIP1 (seed imbibition 1-like); galactinol-sucrose galactosyltransferase/ hydrolase, hydrolyzing O-glycosyl compounds
252934_at	1.28662	0.363589	1.36386	0.447694	3.4.5 minor CHO metabolism.myo-inositol.inositol phosphatase	at4g39120	IMPL2 (MYO-INOSITOL MONOPHOSPHATASE LIKE 2); 3'(2'),5'-bisphosphate nucleotidase/ L-galactose-1-phosphate phosphatase/ inositol
251319_at	1.41756	0.50341	1.41312	0.498888	3.5 minor CHO metabolism.others	at3g61610	aldose 1-epimerase family protein
247563_at	1.46651	0.552388	2.0326	1.02332	3.6 minor CHO metabolism.callose	at5g61130	PDCB1 (PLASMODESMATA CALLOSE-BINDING PROTEIN 1); callose binding / polysaccharide binding
251499_at	1.34601	0.428689	1.41932	0.505198	3.6 minor CHO metabolism.callose	at3g59100	ATGSL11 (glucan synthase-like 11); 1,3-beta-glucan synthase/ transferase, transferring glycosyl groups
263053_at	1.37043	0.454624	1.3585	0.442014	30.1 signalling.in sugar and nutrient physiology	at2g13440	glucose-inhibited division family A protein
261480_at	1.54487	0.627487	1.53033	0.613839	30.11 signalling.light	at1g14280	PKS2 (PHYTOCHROME KINASE SUBSTRATE 2)
261796_at	1.83479	0.875615	2.7068	1.43659	30.11 signalling.light	at1g30440	phototropic-responsive NPH3 family protein
265248_at	1.37347	0.45783	2.33039	1.22057	30.11 signalling.light	at2g43010	PIF4 (phytochrome interacting factor 4); DNA binding / protein binding / transcription factor
266745_at	1.55714	0.638897	3.76633	1.91316	30.11 signalling.light	at2g02950	PKS1 (PHYTOCHROME KINASE SUBSTRATE 1); protein binding
267516_at	1.68353	0.751486	4.62109	2.20823	30.11 signalling.light	at2g30520	RPT2 (ROOT PHOTOTROPISM 2); protein binding
253974_at	1.56539	0.646526	1.82743	0.869816	30.2.11 signalling.receptor kinases.leucine rich repeat XI	at4g26540	kinase
259848_at	1.36753	0.451571	1.49165	0.576911	30.2.11 signalling.receptor kinases.leucine rich repeat XI	at1g72180	leucine-rich repeat transmembrane protein kinase, putative
250642_at	1.36179	0.445505	1.4705	0.556303	30.2.13 signalling.receptor kinases.leucine rich repeat XIII	at5g07180	ERL2 (ERECTA-LIKE 2); kinase
267376_at	1.53592	0.619106	3.0524	1.60995	30.2.13 signalling.receptor kinases.leucine rich repeat XIII	at2g26330	ER (ERECTA); transmembrane receptor protein kinase
248179_at	1.4752	0.560914	3.86276	1.94963	30.2.16 signalling.receptor kinases.Catharanthus roseus-like RLK1	at5g54380	THE1 (THESEUS1); kinase/ protein kinase
249410_at	1.7071	0.77155	2.92093	1.54643	30.2.17 signalling.receptor kinases.DUF 26	at5g40380	protein kinase family protein
255817_at	2.10002	1.0704	6.49962	2.70036	30.2.17 signalling.receptor kinases.DUF 26	at2g33330	PDLP3 (PLASMODESMATA-LOCATED PROTEIN 3)
[truncated: 183 more rows]

## Sheet: LED100_LED500 FC≥1
Up-regulated genes in LED 500
Identifier	FC LED 500	log FC LED 500	BIN	Gene ID	Annotation
259970_at	3.81836	-1.93295	1.1.1.1 PS.lightreaction.photosystem II.LHC-II	at1g76570	chlorophyll A-B binding family protein |
254848_at	4.43762	-2.14979	1.1.40 PS.lightreaction.cyclic electron flow-chlororespiration	at4g11960	PGRL1B | PGRL1B (PGR5-Like B) |
254335_at	2.48409	-1.31272	1.1.40 PS.lightreaction.cyclic electron flow-chlororespiration	at4g22260	IM, IM1 | IM (IMMUTANS); alternative oxidase |
258223_at	2.13647	-1.09523	1.1.40 PS.lightreaction.cyclic electron flow-chlororespiration	at3g15840	PIFI | PIFI (post-illumination chlorophyll fluorescence increase) |
257004_s_at	2.13995	-1.09757	1.2.2 PS.photorespiration.glycolate oxydase	at3g14130,at3g14150 . at3g14130	(S)-2-hydroxy-acid oxidase, peroxisomal, putative / glycolate oxidase, putative / short chain alpha-hydroxy acid oxidase, putative |
254630_at	2.05518	-1.03926	1.2.2 PS.photorespiration.glycolate oxydase	at4g18360	(S)-2-hydroxy-acid oxidase, peroxisomal, putative / glycolate oxidase, putative / short chain alpha-hydroxy acid oxidase, putative |
260309_at	2.06397	-1.04542	1.2.3 PS.photorespiration.aminotransferases peroxisomal AND 13.1.1.3.1 amino acid metabolism.synthesis.central amino acid metabolism.alanine.alanine aminotransferase AND 13.1.5.2.2 amino acid metabolism.synthesis.serine-glycine-cysteine group.glycine.glycine transaminase	at1g70580	AOAT2, GGT2 | AOAT2 (ALANINE-2-OXOGLUTARATE AMINOTRANSFERASE 2); L-alanine
245060_at	2.20625	-1.1416	10.1.1.1 cell wall.precursor synthesis.NDP sugar pyrophosphorylase.GDP mannose	at2g39770	CYT1, VTC1, SOZ1, EMB101, GMP1 | CYT1 (CYTOKINESIS DEFECTIVE 1); mannose-1-phosphate guanylyltransferase/ nucleotidyltransferase |
261211_at	2.22643	-1.15473	10.1.2 cell wall.precursor synthesis.UGE	at1g12780	UGE1 | UGE1 (UDP-D-glucose/UDP-D-galactose 4-epimerase 1); UDP-glucose 4-epimerase/ protein dimerization |
254952_at	2.76094	-1.46516	10.1.2 cell wall.precursor synthesis.UGE AND 11.9.2.1 lipid metabolism.lipid degradation.lipases.triacylglycerol lipase	at4g10960,at4g10955 . at4g10960	UGE5 | UGE5 (UDP-D-glucose/UDP-D-galactose 4-epimerase 5); UDP-glucose 4-epimerase/ protein dimerization |
245465_at	7.37401	-2.88245	10.2 cell wall.cellulose synthesis	at4g16590	ATCSLA01, CSLA01, ATCSLA1 | ATCSLA01; cellulose synthase/ glucosyltransferase/ transferase, transferring glycosyl groups |
263031_at	2.62505	-1.39234	10.2 cell wall.cellulose synthesis	at1g24070	ATCSLA10, CSLA10 | ATCSLA10; cellulose synthase/ transferase, transferring glycosyl groups |
254185_at	12.1124	-3.59842	10.2.1 cell wall.cellulose synthesis.cellulose synthase	at4g23990	ATCSLG3, CSLG3 | ATCSLG3; cellulose synthase/ transferase/ transferase, transferring glycosyl groups |
260592_at	4.4995	-2.16977	10.2.1 cell wall.cellulose synthesis.cellulose synthase	at1g55850	ATCSLE1, CSLE1 | ATCSLE1; cellulose synthase/ transferase, transferring glycosyl groups |
254189_at	2.41616	-1.27272	10.2.1 cell wall.cellulose synthesis.cellulose synthase	at4g24000	ATCSLG2, CSLG2 | ATCSLG2; cellulose synthase/ transferase/ transferase, transferring glycosyl groups |
254186_at	2.05511	-1.03921	10.2.1 cell wall.cellulose synthesis.cellulose synthase	at4g24010	ATCSLG1, CSLG1 | ATCSLG1; cellulose synthase/ transferase/ transferase, transferring glycosyl groups |
245228_at	2.43636	-1.28473	10.2.2 cell wall.cellulose synthesis.COBRA	at3g29810	COBL2 | COBL2 (COBRA-LIKE PROTEIN 2 PRECURSOR) |
247429_at	2.16032	-1.11125	10.3 cell wall.hemicellulose synthesis AND 26.2 misc.UDP glucosyl and glucoronyl transferases	at5g62620	galactosyltransferase family protein |
260666_at	2.33506	-1.22346	10.3.2 cell wall.hemicellulose synthesis.glucuronoxylan	at1g19300	GATL1, PARVUS, GLZ1 | PARVUS (PARVUS); polygalacturonate 4-alpha-galacturonosyltransferase/ transferase, transferring glycosyl groups / transferase, transferring hexosyl groups |
246682_at	3.97388	-1.99055	10.4.4.1 cell wall.pectin synthesis.Xylogalacturonan.Xylose Transferase	at5g33290	XGD1 | XGD1 (XYLOGALACTURONAN DEFICIENT 1); UDP-xylosyltransferase/ catalytic |
245384_at	2.13996	-1.09759	10.5.4 cell wall.cell wall proteins.HRGP	at4g16790	hydroxyproline-rich glycoprotein family protein |
253666_at	2.26534	-1.17973	10.6.2 cell wall.degradation.mannan-xylose-arabinose-fucose	at4g30270	MERI5B, MERI-5, SEN4 | MERI5B (meristem-5); hydrolase, acting on glycosyl bonds / xyloglucan
247266_at	1.99501	-0.996396	10.6.2 cell wall.degradation.mannan-xylose-arabinose-fucose	at5g64570	XYL4, ATBXL4 | XYL4; hydrolase, hydrolyzing O-glycosyl compounds / xylan 1,4-beta-xylosidase |
266070_at	6.47179	-2.69416	10.7 cell wall.modification	at2g18660	EXLB3 | EXLB3 (EXPANSIN-LIKE B3 PRECURSOR) |
267590_at	2.37602	-1.24854	10.7 cell wall.modification	at2g39700	ATEXPA4, ATEXP4, ATHEXP ALPHA 1.6 | ATEXPA4 (ARABIDOPSIS THALIANA EXPANSIN A4) |
245052_at	3.18594	-1.67172	10.8.1 cell wall.pectin*esterases.PME	at2g26440	pectinesterase family protein |
248263_at	1.99767	-0.99832	10.8.1 cell wall.pectin*esterases.PME	at5g53370	ATPMEPCRF, PMEPCRF | PMEPCRF (PECTIN METHYLESTERASE PCR FRAGMENT F); pectinesterase |
246403_at	21.822	-4.44771	10.8.2 cell wall.pectin*esterases.acetyl esterase	at1g57590	carboxylesterase |
254573_at	3.40264	-1.76665	10.8.2 cell wall.pectin*esterases.acetyl esterase	at4g19420	pectinacetylesterase family protein |
264318_at	2.04211	-1.03006	11.1.10 lipid metabolism.FA synthesis and FA elongation.beta ketoacyl CoA synthase	at1g04220	KCS2 | KCS2 (3-KETOACYL-COA SYNTHASE 2); fatty acid elongase |
253840_at	2.33484	-1.22332	11.1.13 lipid metabolism.FA synthesis and FA elongation.acyl-CoA binding protein	at4g27780	ACBP2 | ACBP2 (ACYL-COA BINDING PROTEIN ACBP 2); acyl-CoA binding / lead ion binding |
258485_at	2.36448	-1.24152	11.1.15 lipid metabolism.FA synthesis and FA elongation.ACP desaturase	at3g02630	acyl-(acyl-carrier-protein) desaturase, putative / stearoyl-ACP desaturase, putative |
257196_at	3.78285	-1.91948	11.1.8 lipid metabolism.FA synthesis and FA elongation.acyl coa ligase	at3g23790	AMP-binding protein, putative |
259545_at	3.13319	-1.64763	11.1.8 lipid metabolism.FA synthesis and FA elongation.acyl coa ligase	at1g20560	AAE1 | AAE1 (ACYL ACTIVATING ENZYME 1); AMP binding |
259568_at	3.04462	-1.60626	11.1.8 lipid metabolism.FA synthesis and FA elongation.acyl coa ligase	at1g20490	AMP-dependent synthetase and ligase family protein |
258312_at	2.25106	-1.17061	11.1.8 lipid metabolism.FA synthesis and FA elongation.acyl coa ligase	at3g16170	acyl-activating enzyme 13 (AAE13) |
249869_at	2.24688	-1.16792	11.1.8 lipid metabolism.FA synthesis and FA elongation.acyl coa ligase	at5g23050	AAE17 | AAE17 (ACYL-ACTIVATING ENZYME 17); catalytic/ ligase |
246789_at	7.29153	-2.86622	11.1.9 lipid metabolism.FA synthesis and FA elongation.long chain fatty acid CoA ligase	at5g27600	LACS7, ATLACS7 | LACS7 (LONG-CHAIN ACYL-COA SYNTHETASE 7); long-chain-fatty-acid-CoA ligase/ protein binding |
258563_at	2.06695	-1.0475	11.1.9 lipid metabolism.FA synthesis and FA elongation.long chain fatty acid CoA ligase	at3g05970	LACS6, ATLACS6 | LACS6 (long-chain acyl-CoA synthetase 6); long-chain-fatty-acid-CoA ligase |
263391_at	2.2413	-1.16433	11.10.1 lipid metabolism.glycolipid synthesis.MGDG synthase	at2g11810	MGDC, MGD3, ATMGD3 | MGDC; 1,2-diacylglycerol 3-beta-galactosyltransferase |
259070_at	2.04952	-1.03529	11.10.2 lipid metabolism.glycolipid synthesis.DGDG synthase	at3g11670	DGD1 | DGD1 (DIGALACTOSYL DIACYLGLYCEROL DEFICIENT 1); UDP-galactosyltransferase/ galactolipid galactosyltransferase/ transferase, transferring glycosyl groups |
254998_at	3.91004	-1.96718	11.3.2 lipid metabolism.Phospholipid synthesis.choline kinase	at4g09760	choline kinase, putative |
254360_at	2.96895	-1.56995	11.3.3 lipid metabolism.Phospholipid synthesis.phosphatidate cytidylyltransferase	at4g22340	phosphatidate cytidylyltransferase, putative / CDP-diglyceride synthetase, putative |
250556_at	2.34423	-1.22911	11.3.5 lipid metabolism.Phospholipid synthesis.diacylglycerol kinase	at5g07920	DGK1, ATDGK1 | DGK1 (DIACYLGLYCEROL KINASE1); calcium ion binding / diacylglycerol kinase |
266359_at	2.38007	-1.251	11.3.6 lipid metabolism.Phospholipid synthesis.choline-phosphate cytidylyltransferase	at2g32260	ATCCT1, CCT1 | cholinephosphate cytidylyltransferase, putative / phosphorylcholine transferase, putative / CTP
254035_at	2.18066	-1.12476	11.3.8 lipid metabolism.Phospholipid synthesis.phosphatidylserine decarboxylase	at4g25970	PSD3 | PSD3 (phosphatidylserine decarboxylase 3); phosphatidylserine decarboxylase |
247718_at	30.913	-4.95014	11.6 lipid metabolism.lipid transfer proteins etc	at5g59310	LTP4 | LTP4 (LIPID TRANSFER PROTEIN 4); lipid binding |
247717_at	23.1057	-4.53018	11.6 lipid metabolism.lipid transfer proteins etc	at5g59320	LTP3 | LTP3 (LIPID TRANSFER PROTEIN 3); lipid binding |
264186_at	2.02856	-1.02045	11.7 lipid metabolism.unassigned	at1g54570	esterase/lipase/thioesterase family protein |
261771_at	2.53414	-1.3415	11.8 lipid metabolism.'exotics'(steroids, squalene etc)	at1g76150	ECH2, ATECH2 | maoC-like dehydratase domain-containing protein |
259598_at	5.30467	-2.40726	11.8.1 lipid metabolism.'exotics' (steroids, squalene etc).sphingolipids	at1g27980	DPL1, ATDPL1 | DPL1; carboxy-lyase/ catalytic/ pyridoxal phosphate binding |
261071_at	2.37516	-1.24802	11.8.1.1 lipid metabolism.'exotics' (steroids, squalene etc).sphingolipids.ceramidase	at1g07380	ceramidase family protein |
259057_at	2.249	-1.16929	11.8.10 lipid metabolism.'exotics' (steroids, squalene etc).phosphatidylcholinesterol O-acyltransferase	at3g03310	lecithin
254547_at	2.20859	-1.14313	11.8.10 lipid metabolism.'exotics' (steroids, squalene etc).phosphatidylcholinesterol O-acyltransferase	at4g19860	lecithin
248812_at	3.47408	-1.79663	11.9.1 lipid metabolism.lipid degradation.palmitoyl[protein] hydrolase	at5g47330	palmitoyl protein thioesterase family protein |
260153_at	1.99539	-0.996669	11.9.2 lipid metabolism.lipid degradation.lipases	at1g52760	esterase/lipase/thioesterase family protein |
251191_at	3.91198	-1.9679	11.9.2.1 lipid metabolism.lipid degradation.lipases.triacylglycerol lipase	at3g62590	lipase class 3 family protein |
254715_at	2.85033	-1.51113	11.9.2.1 lipid metabolism.lipid degradation.lipases.triacylglycerol lipase	at4g13550	triacylglycerol lipase |
259708_at	3.60074	-1.84829	11.9.3 lipid metabolism.lipid degradation.lysophospholipases	at1g77420	hydrolase, alpha/beta fold family protein |
258270_at	15.8471	-3.98614	11.9.3.2 lipid metabolism.lipid degradation.lysophospholipases.carboxylesterase	at3g15650	phospholipase/carboxylesterase family protein |
262229_at	6.81369	-2.76844	11.9.3.2 lipid metabolism.lipid degradation.lysophospholipases.carboxylesterase	at1g68620	hydrolase |
260254_at	6.8482	-2.77572	11.9.3.3 lipid metabolism.lipid degradation.lysophospholipases.glycerophosphodiester phosphodiesterase	at1g74210	glycerophosphoryl diester phosphodiesterase family protein |
259169_at	2.52818	-1.3381	11.9.3.5 lipid metabolism.lipid degradation.lysophospholipases.phosphoinositide phospholipase C	at3g03520	phosphoesterase family protein |
245249_at	2.55832	-1.3552	11.9.4.2 lipid metabolism.lipid degradation.beta-oxidation.acyl CoA DH	at4g16760	ACX1, ATACX1 | ACX1 (ACYL-COA OXIDASE 1); acyl-CoA oxidase |
245484_at	2.98881	-1.57957	11.9.4.4 lipid metabolism.lipid degradation.beta-oxidation.hydroxybutyryl CoA DH AND 13.2.6.3 amino acid metabolism.degradation.aromatic aa.tryptophan	at4g16210	ECHIA, E-COAH-2 | ECHIA (ENOYL-COA HYDRATASE/ISOMERASE A); catalytic |
265699_at	2.41381	-1.27131	11.9.4.5 lipid metabolism.lipid degradation.beta-oxidation.acyl-CoA thioesterase	at2g03550	hydrolase |
262237_at	2.16353	-1.11338	11.9.4.5 lipid metabolism.lipid degradation.beta-oxidation.acyl-CoA thioesterase	at1g48320	thioesterase family protein |
258555_at	3.32372	-1.7328	11.9.4.9 lipid metabolism.lipid degradation.beta-oxidation.multifunctional	at3g06860	MFP2, ATMFP2 | MFP2 (MULTIFUNCTIONAL PROTEIN 2); 3-hydroxyacyl-CoA dehydrogenase/ enoyl-CoA hydratase |
253759_at	2.19073	-1.13141	11.9.4.9 lipid metabolism.lipid degradation.beta-oxidation.multifunctional	at4g29010	AIM1 | AIM1 (ABNORMAL INFLORESCENCE MERISTEM); enoyl-CoA hydratase |
266365_at	4.75316	-2.24889	12.2.1.1 N-metabolism.ammonia metabolism.glutamate synthase.ferredoxin dependent	at2g41220	GLU2 | GLU2 (GLUTAMATE SYNTHASE 2); glutamate synthase (ferredoxin) |
249581_at	8.17141	-3.03058	12.2.2 N-metabolism.ammonia metabolism.glutamine synthetase	at5g37600	ATGSR1, GLN1;1, GSR 1 | ATGSR1; copper ion binding / glutamate-ammonia ligase |
250100_at	6.06921	-2.60151	12.2.2 N-metabolism.ammonia metabolism.glutamine synthetase	at5g16570	GLN1;4 | GLN1;4; glutamate-ammonia ligase |
250580_at	4.015	-2.0054	12.3.1 N-metabolism.N-degradation.glutamate dehydrogenase	at5g07440	GDH2 | GDH2 (GLUTAMATE DEHYDROGENASE 2); ATP binding / glutamate dehydrogenase [NAD(P)+]/ glutamate dehydrogenase/ oxidoreductase |
265221_s_at	4.97762	-2.31546	13.1.1.1.1 amino acid metabolism.synthesis.central amino acid metabolism.GABA.Glutamate decarboxylase	at2g02000,at2g02010 . at2g02000	GAD3 | GAD3 (glutamate decarboxylase 3); calmodulin binding |
250090_at	4.78842	-2.25955	13.1.1.1.1 amino acid metabolism.synthesis.central amino acid metabolism.GABA.Glutamate decarboxylase	at5g17330	GAD, GAD1 | GAD; calmodulin binding / glutamate decarboxylase |
256765_at	2.35547	-1.23602	13.1.1.1.2 amino acid metabolism.synthesis.central amino acid metabolism.GABA.GABA transaminase	at3g22200	POP2, GABA-T, HER1 | POP2 (POLLEN-PISTIL INCOMPATIBILITY 2); 4-aminobutyrate transaminase/ 4-aminobutyrate
267035_at	2.28474	-1.19203	13.1.1.3.11 amino acid metabolism.synthesis.central amino acid metabolism.alanine.alanine-glyoxylate aminotransferase	at2g38400	AGT3 | AGT3 (ALANINE
262582_at	5.41863	-2.43793	13.1.2.3.31 amino acid metabolism.synthesis.glutamate family.arginine.aspartate racemase	at1g15410	aspartate-glutamate racemase family |
267066_at	3.26186	-1.70569	13.1.3.4.12 amino acid metabolism.synthesis.aspartate family.methionine.homocysteine S-methyltransferase	at2g41040	methyltransferase-related |
258417_at	2.29902	-1.20102	13.1.3.4.12 amino acid metabolism.synthesis.aspartate family.methionine.homocysteine S-methyltransferase	at3g17365	catalytic/ methyltransferase |
254232_at	6.46972	-2.6937	13.1.3.4.2 amino acid metabolism.synthesis.aspartate family.methionine.cystathionine beta-lyase	at4g23600	CORI3, JR2 | CORI3 (CORONATINE INDUCED 1); cystathionine beta-lyase/ transaminase |
264524_at	5.51735	-2.46397	13.1.4.1.4 amino acid metabolism.synthesis.branched chain group.common.branched-chain amino acid aminotransferase AND 18.4.1 Co-factor and vitamine metabolism.pantothenate.branched-chain amino acid aminotransferase	at1g10070	ATBCAT-2 | ATBCAT-2 (ARABIDOPSIS THALIANA BRANCHED-CHAIN AMINO ACID TRANSAMINASE 2); branched-chain-amino-acid transaminase/ catalytic |
259403_at	6.05123	-2.59723	13.1.5.1.1 amino acid metabolism.synthesis.serine-glycine-cysteine group.serine.phosphoglycerate dehydrogenase	at1g17745	PGDH | PGDH (3-PHOSPHOGLYCERATE DEHYDROGENASE); phosphoglycerate dehydrogenase |
257194_at	2.10248	-1.07209	13.1.5.3.2 amino acid metabolism.synthesis.serine-glycine-cysteine group.cysteine.SAT	at3g13110	ATSERAT2;2, SAT-1, SAT-A, SAT3, SAT-M | ATSERAT2;2 (SERINE ACETYLTRANSFERASE 2;2); serine O-acetyltransferase |
263897_at	2.8114	-1.49129	13.1.6.1.5 amino acid metabolism.synthesis.aromatic aa.chorismate.shikimate kinase	at2g21940	shikimate kinase, putative |
260328_at	2.03265	-1.02336	13.1.6.2 amino acid metabolism.synthesis.aromatic aa.phenylalanine and tyrosine	at1g80360	aminotransferase class I and II family protein |
263539_at	11.0694	-3.4685	13.1.6.4.3 amino acid metabolism.synthesis.aromatic aa.tyrosine.tyrosine transaminase	at2g24850	TAT3, TAT | TAT3 (TYROSINE AMINOTRANSFERASE 3); L-tyrosine
258457_at	2.05737	-1.0408	13.1.7.6 amino acid metabolism.synthesis.histidine.imidazoleglycerol-phosphate dehydratase	at3g22425	IGPD | IGPD; imidazoleglycerol-phosphate dehydratase |
257315_at	2.31855	-1.21323	13.2.2.2 amino acid metabolism.degradation.glutamate family.proline	at3g30775	ERD5, PRODH, AT-POX, ATPOX, ATPDH, PRO1 | ERD5 (EARLY RESPONSIVE TO DEHYDRATION 5); proline dehydrogenase |
248879_at	3.39002	-1.76129	13.2.2.3 amino acid metabolism.degradation.glutamate family.arginine	at5g46180	DELTA-OAT | delta-OAT; ornithine-oxo-acid transaminase |
255065_s_at	3.09258	-1.62881	13.2.2.3 amino acid metabolism.degradation.glutamate family.arginine	at4g08870,at4g08900 . at4g08870	arginase, putative |
267001_at	2.33043	-1.2206	13.2.2.3 amino acid metabolism.degradation.glutamate family.arginine	at2g34470	UREG, PSKF109 | UREG (UREASE ACCESSORY PROTEIN G); ATP binding / metal ion binding / nickel ion binding / nucleotide binding |
258338_at	9.49959	-3.24787	13.2.3.1.1 amino acid metabolism.degradation.aspartate family.asparagine.L-asparaginase	at3g16150	L-asparaginase, putative / L-asparagine amidohydrolase, putative |
253373_at	2.44533	-1.29003	13.2.3.5 amino acid metabolism.degradation.aspartate family.lysine	at4g33150	lysine-ketoglutarate reductase/saccharopine dehydrogenase bifunctional enzyme |
258983_at	141.564	-7.14531	13.2.4.1 amino acid metabolism.degradation.branched chain group.shared	at3g08860	alanine--glyoxylate aminotransferase, putative / beta-alanine-pyruvate aminotransferase, putative / AGT, putative |
245884_at	2.34251	-1.22806	13.2.4.1 amino acid metabolism.degradation.branched chain group.shared	at5g09300	2-oxoisovalerate dehydrogenase, putative / 3-methyl-2-oxobutanoate dehydrogenase, putative / branched-chain alpha-keto acid dehydrogenase E1 alpha subunit, putative |
245168_at	2.17118	-1.11848	13.2.4.1 amino acid metabolism.degradation.branched chain group.shared	at2g33150	PKT3, PED1, KAT2 | PKT3 (PEROXISOMAL 3-KETOACYL-COA THIOLASE 3); acetyl-CoA C-acyltransferase |
260900_s_at	6.06785	-2.60119	13.2.4.1 amino acid metabolism.degradation.branched chain group.shared AND 18.4.3 Co-factor and vitamine metabolism.pantothenate.2-dehydropantoate 2-reductase	at5g34780,at1g21400 . at5g34780	dehydrogenase E1 component family protein |
254445_at	2.45614	-1.29639	13.2.4.3 amino acid metabolism.degradation.branched chain group.valine	at4g20930	3-hydroxyisobutyrate dehydrogenase, putative |
263275_at	2.29461	-1.19825	13.2.4.3 amino acid metabolism.degradation.branched chain group.valine	at2g14170	ALDH6B2 | ALDH6B2; 3-chloroallyl aldehyde dehydrogenase/ methylmalonate-semialdehyde dehydrogenase (acylating)/ oxidoreductase |
252570_at	2.402	-1.26424	13.2.4.4 amino acid metabolism.degradation.branched chain group.leucine	at3g45300	IVD, ATIVD | IVD (ISOVALERYL-COA-DEHYDROGENASE); ATP binding / isovaleryl-CoA dehydrogenase |
248625_at	3.76076	-1.91102	13.2.4.5 amino acid metabolism.degradation.branched chain group.isoleucine	at5g48880	PKT2, KAT5 | PKT2 (PEROXISOMAL 3-KETO-ACYL-COA THIOLASE 2); acetyl-CoA C-acyltransferase/ catalytic |
248779_at	2.15867	-1.11014	13.2.4.5 amino acid metabolism.degradation.branched chain group.isoleucine AND 13.2.6.3 amino acid metabolism.degradation.aromatic aa.tryptophan AND 16.1.2.1 secondary metabolism.isoprenoids.mevalonate pathway.acetyl-CoA C-acyltransferase	at5g47720	acetyl-CoA C-acyltransferase, putative / 3-ketoacyl-CoA thiolase, putative |
264777_at	4.53727	-2.18183	13.2.5.2 amino acid metabolism.degradation.serine-glycine-cysteine group.glycine	at1g08630	THA1 | THA1 (Threonine Aldolase 1); aldehyde-lyase/ threonine aldolase |
258599_at	2.34943	-1.23231	13.2.5.2 amino acid metabolism.degradation.serine-glycine-cysteine group.glycine	at3g04520	THA2 | THA2 (Threonine Aldolase 2); threonine aldolase |
248193_at	4.69987	-2.23262	13.2.6.2 amino acid metabolism.degradation.aromatic aa.tyrosine	at5g54080	HGO | HGO (HOMOGENTISATE 1,2-DIOXYGENASE); homogentisate 1,2-dioxygenase |					Archae - 0; Bacteria - 0; Metazoa - 152; Fungi - 442; Plants - 243; Viruses - 0; Other Eukaryotes - 74 (source
264396_at	2.8843	-1.52822	13.2.6.2 amino acid metabolism.degradation.aromatic aa.tyrosine	at1g12050	fumarylacetoacetase, putative |
248207_at	2.09249	-1.06522	13.2.6.2 amino acid metabolism.degradation.aromatic aa.tyrosine	at5g53970	aminotransferase, putative |
259819_at	2.81201	-1.4916	13.99 amino acid metabolism.misc	at1g49820	ATMTK | ATMTK (ARABIDOPSIS THALIANA S-METHYL-5-THIORIBOSE KINASE); S-methyl-5-thioribose kinase |
247005_at	3.71146	-1.89199	14.15 S-assimilation.AKN	at5g67520	adenylylsulfate kinase, putative |
254343_at	2.17916	-1.12377	14.2 S-assimilation.APR	at4g21990	APR3, PRH-26, PRH26, ATAPR3 | APR3 (APS REDUCTASE 3); adenylyl-sulfate reductase |
249922_at	3.48722	-1.80208	15 metal handling	at5g19140	ATAILP1, AILP1 | AILP1 |
248540_at	2.2771	-1.1872	15.1 metal handling.acquisition	at5g50160	ATFRO8, FRO8 | FRO8 (FERRIC REDUCTION OXIDASE 8); ferric-chelate reductase/ oxidoreductase |
259008_at	5.62837	-2.49272	15.2 metal handling.binding, chelation and storage	at3g09390	MT2A, ATMT-K, ATMT-1 | MT2A (METALLOTHIONEIN 2A); copper ion binding |
253172_at	4.34515	-2.11941	15.2 metal handling.binding, chelation and storage	at4g35060	heavy-metal-associated domain-containing protein / copper chaperone (CCH)-related |
251109_at	3.69089	-1.88397	15.2 metal handling.binding, chelation and storage	at5g01600	ATFER1, FER1 | ATFER1; ferric iron binding / iron ion binding |
257054_at	2.85638	-1.51419	15.2 metal handling.binding, chelation and storage	at3g15353	MT3 | MT3 (METALLOTHIONEIN 3); copper ion binding |
246429_at	2.74758	-1.45816	15.2 metal handling.binding, chelation and storage	at5g17450	heavy-metal-associated domain-containing protein / copper chaperone (CCH)-related |
252956_at	2.5182	-1.3324	15.2 metal handling.binding, chelation and storage	at4g38580	ATFP6, HIPP26 | ATFP6 (FARNESYLATED PROTEIN 6); metal ion binding |
264261_at	2.32664	-1.21825	15.2 metal handling.binding, chelation and storage	at1g09240	NAS3, ATNAS3 | NAS3 (NICOTIANAMINE SYNTHASE 3); nicotianamine synthase |
259824_at	2.22369	-1.15296	15.2 metal handling.binding, chelation and storage	at1g66240	ATX1, ATATX1 | ATX1 (ARABIDOPSIS HOMOLOG OF ANTI-OXIDANT 1); metal ion binding |
267405_at	2.06165	-1.0438	15.2 metal handling.binding, chelation and storage	at2g33740	CUTA | CUTA; copper ion binding |
251733_at	2.02803	-1.02008	15.2 metal handling.binding, chelation and storage	at3g56240	CCH | CCH (COPPER CHAPERONE); copper chaperone |
245373_s_at	2.66654	-1.41497	15.3 metal handling.regulation	at4g14716,at4g14710 . at4g14716	ATARD1 | ATARD1 (ACIREDUCTONE DIOXYGENASE 1); acireductone dioxygenase [iron(II)-requiring]/ metal ion binding |
250313_at	2.09344	-1.06588	16.1.1 secondary metabolism.isoprenoids.non-mevalonate pathway	at5g12210	geranylgeranyl transferase type II beta subunit, putative / RAB geranylgeranyltransferase beta subunit, putative |
252996_s_at	2.23305	-1.15902	16.1.1.10 secondary metabolism.isoprenoids.non-mevalonate pathway.geranylgeranyl pyrophosphate synthase	at4g38460	GGR | GGR (geranylgeranyl reductase); farnesyltranstransferase |
247637_at	2.18199	-1.12565	16.1.1.6 secondary metabolism.isoprenoids.non-mevalonate pathway.HDS	at5g60600	GCPE, ISPG, CSB3, CLB4, HDS | HDS (4-HYDROXY-3-METHYLBUT-2-ENYL DIPHOSPHATE SYNTHASE); 4 iron, 4 sulfur cluster binding / 4-hydroxy-3-methylbut-2-en-1-yl diphosphate synthase |
262635_at	2.28191	-1.19024	16.1.3.1 secondary metabolism.isoprenoids.tocopherol biosynthesis.hydroxyphenylpyruvate dioxygenase	at1g06570	PDS1, HPD | PDS1 (PHYTOENE DESATURATION 1); 4-hydroxyphenylpyruvate dioxygenase |
266938_at	2.05841	-1.04153	16.1.3.2 secondary metabolism.isoprenoids.tocopherol biosynthesis.homogentisate phytyltransferase	at2g18950	HPT1, TPT1, ATHPT, VTE2 | HPT1 (HOMOGENTISATE PHYTYLTRANSFERASE 1); homogentisate phytyltransferase/ prenyltransferase |
253394_at	2.22863	-1.15616	16.1.3.4 secondary metabolism.isoprenoids.tocopherol biosynthesis.tocopherol cyclase	at4g32770	VTE1, ATSDX1 | VTE1 (VITAMIN E DEFICIENT 1); tocopherol cyclase |
262875_at	2.89155	-1.53184	16.1.3.5 secondary metabolism.isoprenoids.tocopherol biosynthesis.tocopherol methyltransferase	at1g64970	G-TMT, TMT1, VTE4 | G-TMT (GAMMA-TOCOPHEROL METHYLTRANSFERASE); tocopherol O-methyltransferase |
263122_at	2.2843	-1.19175	16.1.5 secondary metabolism.isoprenoids.terpenoids	at1g78510	SPS1 | SPS1 (solanesyl diphosphate synthase 1); trans-octaprenyltranstransferase |
247038_at	3.99747	-1.99909	16.2 secondary metabolism.phenylpropanoids	at5g67160	EPS1 | EPS1 (ENHANCED PSEUDOMONAS SUSCEPTIBILTY 1); transferase/ transferase, transferring acyl groups other than amino-acyl groups |
252200_at	3.67518	-1.87781	16.2 secondary metabolism.phenylpropanoids	at3g50280	transferase family protein |
259518_at	2.92974	-1.55077	16.2 secondary metabolism.phenylpropanoids	at1g20510	OPCL1 | OPCL1 (OPC-8
266578_at	2.3163	-1.21182	16.2 secondary metabolism.phenylpropanoids	at2g23910	cinnamoyl-CoA reductase-related |
249849_at	2.16407	-1.11375	16.2 secondary metabolism.phenylpropanoids	at5g23230	NIC2 | NIC2 (NICOTINAMIDASE 2); catalytic/ nicotinamidase |
260260_at	2.06427	-1.04563	16.2 secondary metabolism.phenylpropanoids	at1g68540	oxidoreductase family protein |
262744_at	1.99926	-0.999466	16.2 secondary metabolism.phenylpropanoids	at1g28680	transferase family protein |
252183_at	2.70206	-1.43406	16.2.1 secondary metabolism.phenylpropanoids.lignin biosynthesis	at3g50740	UGT72E1 | UGT72E1 (UDP-glucosyl transferase 72E1); UDP-glycosyltransferase/ coniferyl-alcohol glucosyltransferase/ transferase, transferring glycosyl groups |
259911_at	4.12143	-2.04315	16.2.1.10 secondary metabolism.phenylpropanoids.lignin biosynthesis.CAD	at1g72680	ATCAD1, CAD1 | cinnamyl-alcohol dehydrogenase, putative |
253277_at	3.53026	-1.81977	16.2.1.10 secondary metabolism.phenylpropanoids.lignin biosynthesis.CAD	at4g34230	CAD5, ATCAD5, CAD-5 | ATCAD5 (CINNAMYL ALCOHOL DEHYDROGENASE 5); cinnamyl-alcohol dehydrogenase |
258037_at	3.59616	-1.84646	16.2.1.3 secondary metabolism.phenylpropanoids.lignin biosynthesis.4CL	at3g21230	4CL5 | 4CL5 (4-coumarate
253276_at	2.11179	-1.07846	16.2.1.6 secondary metabolism.phenylpropanoids.lignin biosynthesis.CCoAOMT	at4g34050	caffeoyl-CoA 3-O-methyltransferase, putative |
252117_at	6.08188	-2.60452	16.4.1 secondary metabolism.N misc.alkaloid-like	at3g51430	YLS2 | YLS2; strictosidine synthase |
245756_at	3.89141	-1.96029	16.4.1 secondary metabolism.N misc.alkaloid-like	at1g35190	oxidoreductase, 2OG-Fe(II) oxygenase family protein |
252068_at	3.05561	-1.61146	16.4.1 secondary metabolism.N misc.alkaloid-like	at3g51440	strictosidine synthase family protein |
252114_at	2.36114	-1.23948	16.4.1 secondary metabolism.N misc.alkaloid-like	at3g51450	strictosidine synthase family protein |
262173_at	2.0485	-1.03457	16.4.2.1 secondary metabolism.N misc.betaine.betaine-aldehyde dehydrogenase	at1g74920	ALDH10A8 | ALDH10A8; 3-chloroallyl aldehyde dehydrogenase/ oxidoreductase |
263256_at	2.15961	-1.11077	16.5 secondary metabolism.sulfur-containing	at1g10500	ATCPISCA | ATCPISCA (chloroplast-localized IscA-like protein); structural molecule |
265122_at	6.1961	-2.63136	16.5.1.1.1.10 secondary metabolism.sulfur-containing.glucosinolates.synthesis.aliphatic.flavin-containing monooxygenase AND 26.7 misc.oxidases - copper, flavone etc	at1g62540	FMO GS-OX2 | FMO GS-OX2 (FLAVIN-MONOOXYGENASE GLUCOSINOLATE S-OXYGENASE 2); 3-methylthiopropyl glucosinolate S-oxygenase/ 4-methylthiopropyl glucosinolate S-oxygenase/ 5-methylthiopropyl glucosinolate S-oxygenase/ 7-methylthiopropyl glucosinolate S-oxygenase/ 8-methyl |
248713_at	5.69369	-2.50936	16.5.1.3.2 secondary metabolism.sulfur-containing.glucosinolates.degradation.nitrilespecifier protein AND 17.7.3 hormone metabolism.jasmonate.induced-regulated-responsive-activated	at5g48180	NSP5 | NSP5 (NITRILE SPECIFIER PROTEIN 5) |
259381_s_at	2.02944	-1.02108	16.5.1.3.2 secondary metabolism.sulfur-containing.glucosinolates.degradation.nitrilespecifier protein AND 17.7.3 hormone metabolism.jasmonate.induced-regulated-responsive-activated AND 26.16 misc.myrosinases-lectin-jacalin	at3g16410,at3g16390,at3g16400 . at3g16410	NSP4 | NSP4 (NITRILE SPECIFIER PROTEIN 4) |	ATMLP-470, NSP1, ATNSP1 | NSP1 (NITRILE SPECIFIER PROTEIN 1) | chr3	5566086-5568545 FORWARD
249942_at	4.77231	-2.25469	16.5.1.3.3 secondary metabolism.sulfur-containing.glucosinolates.degradation.nitrilase AND 26.8 misc.nitrilases, *nitrile lyases, berberine bridge enzymes, reticuline oxidases, troponine reductases	at5g22300	NIT4 | NIT4 (NITRILASE 4); 3-cyanoalanine hydratase/ cyanoalanine nitrilase/ indole-3-acetonitrile nitrilase/ nitrilase/ nitrile hydratase |
256008_s_at	54.1388	-5.75859	16.5.99.1 secondary metabolism.sulfur-containing.misc.alliinase	at1g34040,at1g34060 . at1g34040	alliinase family protein |
245628_at	25.7633	-4.68725	16.8.1 secondary metabolism.flavonoids.anthocyanins	at1g56650	PAP1, MYB75, SIAA1, ATMYB75 | PAP1 (PRODUCTION OF ANTHOCYANIN PIGMENT 1); DNA binding / transcription factor |
250793_at	2.09824	-1.06918	16.8.1 secondary metabolism.flavonoids.anthocyanins	at5g05600	oxidoreductase, 2OG-Fe(II) oxygenase family protein |
254283_s_at	35.2929	-5.1413	16.8.1.1 secondary metabolism.flavonoids.anthocyanins.leucocyanidin dioxygenase	at4g22870,at4g22880 . at4g22870	leucoanthocyanidin dioxygenase, putative / anthocyanidin synthase, putative |
265091_s_at	68.6476	-6.10114	16.8.1.21 secondary metabolism.flavonoids.anthocyanins.anthocyanin 5-aromatic acyltransferase	at1g03940,at1g03495 . at1g03940	transferase family protein |
256924_at	6.5705	-2.716	16.8.1.21 secondary metabolism.flavonoids.anthocyanins.anthocyanin 5-aromatic acyltransferase	at3g29590	AT5MAT | AT5MAT; O-malonyltransferase/ transferase |
249489_at	3.14732	-1.65412	16.8.1.21 secondary metabolism.flavonoids.anthocyanins.anthocyanin 5-aromatic acyltransferase	at5g39090	transferase family protein |
250794_at	2.90415	-1.53812	16.8.2 secondary metabolism.flavonoids.chalcones	at5g05270	chalcone-flavanone isomerase family protein |
250207_at	2.08074	-1.0571	16.8.2.1 secondary metabolism.flavonoids.chalcones.naringenin-chalcone synthase	at5g13930	CHS, TT4, ATCHS | TT4 (TRANSPARENT TESTA 4); naringenin-chalcone synthase |
251827_at	2.35774	-1.23741	16.8.2.2 secondary metabolism.flavonoids.chalcones.chalcone isomerase	at3g55120	TT5, A11, CFI | TT5 (TRANSPARENT TESTA 5); chalcone isomerase |
248185_at	48.5439	-5.60122	16.8.3 secondary metabolism.flavonoids.dihydroflavonols	at5g54060	UF3GT | UF3GT (udp-glucose
255622_at	3.3992	-1.7652	16.8.3 secondary metabolism.flavonoids.dihydroflavonols	at4g01070	GT72B1, UGT72B1 | GT72B1; UDP-glucosyltransferase/ UDP-glycosyltransferase/ transferase, transferring glycosyl groups |
249754_at	2.48755	-1.31473	16.8.3 secondary metabolism.flavonoids.dihydroflavonols	at5g24530	DMR6 | DMR6 (DOWNY MILDEW RESISTANT 6); oxidoreductase/ oxidoreductase, acting on paired donors, with incorporation or reduction of molecular oxygen, 2-oxoglutarate as one donor, and incorporation of one atom each of oxygen into both donors |
249215_at	51.6009	-5.68932	16.8.3.1 secondary metabolism.flavonoids.dihydroflavonols.dihydroflavonol 4-reductase	at5g42800	DFR, TT3, M318 | DFR (DIHYDROFLAVONOL 4-REDUCTASE); dihydrokaempferol 4-reductase |
252123_at	4.76916	-2.25373	16.8.3.2 secondary metabolism.flavonoids.dihydroflavonols.flavanone 3-hydroxylase	at3g51240	F3H, TT6, F3'H | F3H (FLAVANONE 3-HYDROXYLASE); naringenin 3-dioxygenase |
250558_at	14.8014	-3.88767	16.8.3.3 secondary metabolism.flavonoids.dihydroflavonols.flavonoid 3''-monooxygenase	at5g07990	TT7, CYP75B1, D501 | TT7 (TRANSPARENT TESTA 7); flavonoid 3'-monooxygenase/ oxygen binding |
254834_at	3.57402	-1.83755	16.8.3.3 secondary metabolism.flavonoids.dihydroflavonols.flavonoid 3''-monooxygenase	at4g12300	CYP706A4 | CYP706A4; electron carrier/ heme binding / iron ion binding / monooxygenase/ oxygen binding |
252213_at	3.52769	-1.81872	16.8.4 secondary metabolism.flavonoids.flavonols	at3g50210	2-oxoacid-dependent oxidase, putative |
262482_at	2.89639	-1.53426	16.8.4 secondary metabolism.flavonoids.flavonols	at1g17020	SRG1, ATSRG1 | SRG1 (SENESCENCE-RELATED GENE 1); oxidoreductase, acting on diphenols and related substances as donors, oxygen as acceptor / oxidoreductase, acting on paired donors, with incorporation or reduction of molecular oxygen, 2-oxoglutarate as one donor, and inc |
254053_s_at	2.84254	-1.50718	16.8.4 secondary metabolism.flavonoids.flavonols	at4g25310,at4g25300 . at4g25310	oxidoreductase, 2OG-Fe(II) oxygenase family protein |
265200_s_at	2.62744	-1.39366	16.8.4 secondary metabolism.flavonoids.flavonols AND 20.1 stress.biotic	at2g36800,at2g36790 . at2g36800	DOGT1, UGT73C5 | DOGT1 (DON-GLUCOSYLTRANSFERASE 1); UDP-glycosyltransferase/ cis-zeatin O-beta-D-glucosyltransferase/ glucosyltransferase/ quercetin 4'-O-glucosyltransferase/ quercetin 7-O-glucosyltransferase/ trans-zeatin O-beta-D-glucosyltransferase/ transferase, transf |
253268_s_at	2.59275	-1.37448	16.8.4.2 secondary metabolism.flavonoids.flavonols.flavonol 3-O-glycosyltransferase AND 26.2 misc.UDP glucosyl and glucoronyl transferases	at4g34131,at4g34135 . at4g34131	UGT73B3 | UGT73B3 (UDP-glucosyl transferase 73B3); UDP-glycosyltransferase/ abscisic acid glucosyltransferase/ quercetin 3-O-glucosyltransferase/ transferase, transferring hexosyl groups |
246468_at	3.98641	-1.99509	16.8.4.3 secondary metabolism.flavonoids.flavonols.flavonol-3-O-rhamnosyltransferase	at5g17050	UGT78D2 | UGT78D2 (UDP-GLUCOSYL TRANSFERASE 78D2); UDP-glycosyltransferase/ anthocyanidin 3-O-glucosyltransferase/ quercetin 3-O-glucosyltransferase/ transferase, transferring glycosyl groups |
256454_at	4.71772	-2.23809	16.8.5.1 secondary metabolism.flavonoids.isoflavones.isoflavone reductase	at1g75280	isoflavone reductase, putative |
256509_at	3.95668	-1.98429	16.8.5.1 secondary metabolism.flavonoids.isoflavones.isoflavone reductase	at1g75300	isoflavone reductase, putative |
248330_at	3.16793	-1.66354	16.99 secondary metabolism.unspecified	at5g52810	ornithine cyclodeaminase/mu-crystallin family protein |
254564_at	2.33942	-1.22615	17.1.1.1.10 hormone metabolism.abscisic acid.synthesis-degradation.synthesis.9-cis-epoxycarotenoid dioxygenase	at4g19170	NCED4 | NCED4 (NINE-CIS-EPOXYCAROTENOID DIOXYGENASE 4) |
253994_at	3.21516	-1.68489	17.1.2 hormone metabolism.abscisic acid.signal transduction	at4g26080	ABI1 | ABI1 (ABA INSENSITIVE 1); calcium ion binding / protein serine/threonine phosphatase |
251169_at	2.78833	-1.4794	17.1.2 hormone metabolism.abscisic acid.signal transduction	at3g63210	MARD1 | MARD1 |
247957_at	3.5145	-1.81332	17.1.2 hormone metabolism.abscisic acid.signal transduction AND 29.4 protein.postranslational modification	at5g57050	ABI2 | ABI2 (ABA INSENSITIVE 2); protein serine/threonine phosphatase |
248466_at	2.90178	-1.53694	17.1.3 hormone metabolism.abscisic acid.induced-regulated-responsive-activated	at5g50720	ATHVA22E, HVA22E | ATHVA22E |
250279_at	2.31505	-1.21104	17.1.3 hormone metabolism.abscisic acid.induced-regulated-responsive-activated	at5g13200	GRAM domain-containing protein / ABA-responsive protein-related |
258610_at	4.01086	-2.00391	17.2.1 hormone metabolism.auxin.synthesis-degradation	at3g02875	ILR1 | ILR1 (IAA-LEUCINE RESISTANT 1); IAA-Leu conjugate hydrolase/ IAA-Phe conjugate hydrolase/ metallopeptidase |
263184_at	2.28076	-1.18952	17.2.1 hormone metabolism.auxin.synthesis-degradation	at1g05560	UGT1, UGT75B1 | UGT75B1 (UDP-GLUCOSYLTRANSFERASE 75B1); UDP-glucose
250123_at	2.39672	-1.26106	17.2.2 hormone metabolism.auxin.signal transduction	at5g16530	PIN5 | PIN5 (PIN-FORMED 5); auxin
[truncated: 2,140 more rows]

## Sheet: LED100-LED200 FC≥1
Up-regulated genes in LED200
Identifier	FC LED 200	log FC LED200	BIN	Gene ID	annotation
[truncated: 343 more rows]

## Sheet: Paper FC≥1 LED100_LED200_500
Up-regulated genes in LED 200/LED 500
[truncated: 1,325 more rows]

[truncated: 4 more sheets: Übersicht RB_Red_blue, LED100_Rot, LED100-Blue, LED100_RB]
